# Supplementary material
Source: Research Square preprint supplement (doi:10.21203/rs.3.rs-9182910/v1)
Supplement: Supplementary file 1 [file 466e80cc67dd58229b36d869.xlsx]

## Sheet: Variable mapping
Abbreviation	Full name	Description
EQ	Experience Quality	Outcome variable used in configurational analysis
SSQ	Slope and Snow Quality	Evaluation of slope conditions, snow quality, and core skiing infrastructure
REQ	Rental and Equipment	Evaluation of rental service adequacy and equipment provision
AT	Accessibility and Transport	Evaluation of access convenience and transport conditions
NSE	Natural Scenery and Environment	Evaluation of scenery and environmental atmosphere
TOP	Ticketing and On-site Process	Evaluation of ticketing efficiency and on-site operational processes
SEI	Service Encounter and Instruction	Evaluation of staff professionalism and instructional support
PFV	Price Fairness and Value	Evaluation of price fairness and value for money

## Sheet: Calibration anchors
Variable	Full out (Q1)	Cross-over (Median)	Full in (Q3)
EQ	0.647665	0.703703	0.742301
SSQ	0.5825	0.677	0.7525
REQ	0.622	0.682	0.751
AT	0.5535	0.721	0.791
NSE	0.6185	0.712	0.7835
TOP	0.682	0.721	0.7515
SEI	0.6855	0.752	0.7905
PFV	0.652	0.722	0.806

## Sheet: NCA results
Condition	CE-FDH d	p_value	Condition inefficiency	Outcome inefficiency
TOP	0.502471	0.00899101	0.964861	0.133215
SSQ	0.420393	0.000999001	0.782609	0.0390692
REQ	0.323229	0.000999001	0.680431	0.128909
PFV	0.254904	0.000999001	0.880252	0.468671
NSE	0.237378	0.023976	0.617363	0.571566
AT	0.215731	0.0829171	0.732394	0.17051
SEI	0.207996	0.434565	0.850812	0.585003
NCA Bottleneck Value Table (Outcome Target: Raw num Value)
Outcome target	A	B	C	D
0.65	0.385	0.388	0.352	0.369
0.7	0.5522	0.49	0.352	0.369
0.75	0.677	0.629	0.352	0.695
0.8	0.726	0.716	0.696	0.712

## Sheet: fsQCA necessity
Condition	Consistency	Coverage
SSQ	0.880235	0.866941
NSE	0.866691	0.851103
PFV	0.846441	0.808243
REQ	0.823482	0.822776
SEI	0.726437	0.705975
~AT	0.631205	0.63192
TOP	0.603995	0.607477
~TOP	0.558924	0.543775
AT	0.543163	0.530818
~SEI	0.460138	0.463316
~REQ	0.344566	0.33739
~NSE	0.342531	0.341231
~PFV	0.339821	0.348583
~SSQ	0.318399	0.316252

## Sheet: Truth table
SSQ	REQ	AT	NSE	TOP	SEI	PFV	row	n	consistency	PRI	Selected
1	1	0	1	0	1	1	1101011	9	1	1	TRUE
1	1	0	1	1	1	1	1101111	6	1	1	TRUE
1	1	1	0	1	0	1	1110101	3	1	1	TRUE
1	1	1	1	1	1	1	1111111	3	1	1	TRUE
1	1	1	1	0	1	1	1111011	2	1	1	TRUE
1	1	0	1	1	0	1	1101101	2	0.99876	0.996177	TRUE
0	0	1	0	1	0	0	10100	8	0.573907	-64.2425	FALSE
0	0	0	0	0	0	0	0	6	0.512371	-310.573	FALSE
0	0	1	0	1	1	0	10110	4	0.587548	-19.0898	FALSE
0	0	1	0	0	0	0	10000	3	0.668636		FALSE
0	1	1	1	0	1	1	111011	2	0.949496	0.295053	FALSE
1	0	0	0	0	1	1	1000011	2	0.944172	0.170942	FALSE
1	1	0	1	0	0	0	1101000	2	0.916724	0.497192	FALSE
0	0	0	1	0	0	1	1001	2	0.852008	-44.6523	FALSE
0	1	1	0	1	1	0	110110	2	0.814166	-2.70527	FALSE
0	0	1	0	0	1	0	10010	2	0.794037	-45.3351	FALSE
1	0	1	1	0	1	1	1011011	1	1	1	FALSE
1	0	1	1	1	0	1	1011101	1	1	1	FALSE
1	1	1	1	0	0	1	1111001	1	1	1	FALSE
1	1	1	1	1	1	0	1111110	1	1	1	FALSE
1	1	0	1	0	0	1	1101001	1	0.999071	0.996648	FALSE
1	1	0	0	1	0	0	1100100	1	0.998209	0.96549	FALSE
1	0	1	0	1	0	1	1010101	1	0.994277	0.948768	FALSE
0	1	0	1	0	1	1	101011	1	0.989142	0.891622	FALSE
0	1	1	1	1	1	0	111110	1	0.983153	0.862316	FALSE
1	1	0	1	0	1	0	1101010	1	0.982736	0.884029	FALSE
0	0	1	1	1	0	1	11101	1	0.98109	0.779576	FALSE
0	0	1	1	0	1	0	11010	1	0.965185	-0.792226	FALSE
1	0	1	1	1	0	0	1011100	1	0.962994	0.478131	FALSE
1	1	0	0	0	0	0	1100000	1	0.928983	0.140016	FALSE
0	1	0	0	0	1	0	100010	1	0.928052	-2.17561	FALSE
0	0	1	0	1	1	1	10111	1	0.923688	-0.49398	FALSE
1	0	0	0	1	0	1	1000101	1	0.916726	-0.75741	FALSE
0	1	1	0	0	1	0	110010	1	0.886056	-39.7423	FALSE
0	0	0	0	0	1	1	11	1	0.871921	-3.34645	FALSE
0	0	0	0	1	1	0	110	1	0.864779	-6.7854	FALSE
1	0	1	0	1	0	0	1010100	1	0.863534	-5.18277	FALSE
0	0	0	1	1	0	1	1101	1	0.863406	-4.45803	FALSE
1	1	1	0	0	0	0	1110000	1	0.86004	-2.58769	FALSE
0	0	0	0	1	0	0	100	1	0.844328	-13.5219	FALSE
0	0	0	0	0	0	1	1	1	0.838792	-57.8484	FALSE

## Sheet: Parsimonious solution
Solution	Expression	Solution consistency	Solution coverage
Parsimonious	B*E*G + A*B*F*G	0.989996	0.654056
Path	Raw coverage	Unique coverage	Consistency
B*E*G	0.440579	0.0982373	0.98522
A*B*F*G	0.555819	0.213477	1

## Sheet: Complex solution
Solution	Expression	Solution consistency	Solution coverage
Complex	A*B*D*F*G + A*B*~C*D*E*G + A*B*C*~D*E*~F*G	0.999599	0.628455
Path	Raw coverage	Unique coverage	Consistency
A*B*D*F*G	0.554571	0.282862	1
A*B*~C*D*E*G	0.29883	0.0279084	0.999157
A*B*C*~D*E*~F*G	0.171134	0.0422261	1

## Sheet: Case membership
name	row	Selected	n	consistency	PRI
万科石京龙滑雪场	1101011	TRUE	9	1	1
五峰国际滑雪场	1101011	TRUE	9	1	1
兴隆山滑雪场	1101011	TRUE	9	1	1
太白鳌山滑雪场	1101011	TRUE	9	1	1
嵩顶滑雪度假区	1101011	TRUE	9	1	1
照金国际滑雪场	1101011	TRUE	9	1	1
神农架中和滑雪场	1101011	TRUE	9	1	1
神农架国际滑雪场	1101011	TRUE	9	1	1
龙山国际滑雪场	1101011	TRUE	9	1	1
大连林海滑雪场	1101101	TRUE	2	0.99876	0.996177
天桥沟滑雪场	1101101	TRUE	2	0.99876	0.996177
英山大别山南武当滑雪场	1101101	TRUE	2	0.99876	0.996177
可可托海国际滑雪度假区	1101111	TRUE	6	1	1
呼伦贝尔市·凤凰山滑雪中心	1101111	TRUE	6	1	1
沈阳怪坡滑雪场	1101111	TRUE	6	1	1
留坝县紫柏山国际滑雪场	1101111	TRUE	6	1	1
辽阳弓长岭温泉滑雪场	1101111	TRUE	6	1	1
青格里狼山国际滑雪场	1101111	TRUE	6	1	1
万达长白山国际滑雪场	1110101	TRUE	3	1	1
太舞滑雪场	1110101	TRUE	3	1	1
长白山国际滑雪场	1110101	TRUE	3	1	1
莲花山滑雪场	1111011	TRUE	2	1	1
长春庙香山滑雪场	1111011	TRUE	2	1	1
千山滑雪场	1111111	TRUE	3	1	1
将军山滑雪场	1111111	TRUE	3	1	1
棋盘山冰雪大世界	1111111	TRUE	3	1	1
长春净月潭滑雪场	1111111	TRUE	3	1	1
五龙高尔夫滑雪场	0	FALSE	6	0.512371	-310.573
何家沟滑雪场	0	FALSE	6	0.512371	-310.573
八达岭滑雪场	0	FALSE	6	0.512371	-310.573
多乐美地滑雪度假区	0	FALSE	6	0.512371	-310.573
密云苑云顶滑雪场	0	FALSE	6	0.512371	-310.573
莲花山滑雪场	0	FALSE	6	0.512371	-310.573
牡丹峰滑雪场	1	FALSE	1	0.838792	-57.8484
东北亚滑雪场	11	FALSE	1	0.871921	-3.34645
雪都滑雪场	100	FALSE	1	0.844328	-13.5219
黄冈桃花冲滑雪场	100	FALSE	1	0.844328	-13.5219
长白山和平滑雪场	110	FALSE	1	0.864779	-6.7854
哈体院帽儿山滑雪场	1001	FALSE	2	0.852008	-44.6523
白清寨滑雪场	1001	FALSE	2	0.852008	-44.6523
美林谷滑雪场	1101	FALSE	1	0.863406	-4.45803
哈尔滨玉泉霜雪滑雪场	10000	FALSE	3	0.668636
玉泉威虎山滑雪场	10000	FALSE	3	0.668636
金龙山滑雪场	10000	FALSE	3	0.668636
哈尔滨名都滑雪场	10010	FALSE	2	0.794037	-45.3351
平山神鹿滑雪场	10010	FALSE	2	0.794037	-45.3351
丰原必捷滑雪场	10100	FALSE	8	0.573907	-64.2425
九龙口滑雪乐园	10100	FALSE	8	0.573907	-64.2425
冯家塬必捷滑雪场	10100	FALSE	8	0.573907	-64.2425
当阳峪滑雪乐园	10100	FALSE	8	0.573907	-64.2425
海兰江滑雪场	10100	FALSE	8	0.573907	-64.2425
白云滑雪场	10100	FALSE	8	0.573907	-64.2425
翠云山银河滑雪场	10100	FALSE	8	0.573907	-64.2425
袁家村北必捷滑雪场	10100	FALSE	8	0.573907	-64.2425
倒盏村奥斯陆滑雪场	10110	FALSE	4	0.587548	-19.0898
和平湾冰雪大世界	10110	FALSE	4	0.587548	-19.0898
天恒山冰雪运动大世界	10110	FALSE	4	0.587548	-19.0898
极地冰雪小镇(郑州人民公园店)	10110	FALSE	4	0.587548	-19.0898
白鹿原滑雪场	10110	FALSE	4	0.587548	-19.0898
郑州豫龙滑雪场	10110	FALSE	4	0.587548	-19.0898
丝绸之路国际滑雪场	10111	FALSE	1	0.923688	-0.49398
亚布力雪都滑雪度假中心	11010	FALSE	1	0.965185	-0.792226
长春天定山滑雪场	11101	FALSE	1	0.98109	0.779576
上京国际滑雪场	100010	FALSE	1	0.928052	-2.17561
梦都美民俗旅游度假村滑雪场	101011	FALSE	1	0.989142	0.891622
华彬生态园滑雪场	110000	FALSE	0	0.879083
东村·滑雪公园	110010	FALSE	1	0.886056	-39.7423
翠华山滑雪场	110110	FALSE	2	0.814166	-2.70527
蓝调庄园-滑雪场	110110	FALSE	2	0.814166	-2.70527
北京西山滑雪场	111011	FALSE	2	0.949496	0.295053
哈尔滨热雪奇迹	111011	FALSE	2	0.949496	0.295053
西安竹林畔滑雪场	111110	FALSE	1	0.983153	0.862316
军都山滑雪场	1000011	FALSE	2	0.944172	0.170942
大连铭湖温泉滑雪度假园区	1000011	FALSE	2	0.944172	0.170942
大跳台	1000101	FALSE	1	0.916726	-0.75741
天山·天池国际滑雪场	1000111	FALSE	0	1	1
万峰通化滑雪度假区	1010100	FALSE	1	0.863534	-5.18277
南山滑雪场	1010101	FALSE	1	0.994277	0.948768
北京渔阳国际滑雪场	1011011	FALSE	1	1	1
北京怀北国际滑雪场	1011100	FALSE	1	0.962994	0.478131
长白山华美胜地山地滑雪场	1011101	FALSE	1	1	1
赤峰道谷南山滑雪场	1100000	FALSE	1	0.928983	0.140016
伊龙国际滑雪场	1100100	FALSE	1	0.998209	0.96549
北京云佛山滑雪场	1101000	FALSE	2	0.916724	0.497192
维斯特滑雪场	1101000	FALSE	2	0.916724	0.497192
华山国际滑雪场	1101001	FALSE	1	0.999071	0.996648
云居滑雪场	1101010	FALSE	1	0.982736	0.884029
北大湖滑雪度假区	1101010	FALSE	1	0.982736	0.884029
阿那亚拾雪川滑雪场	1110000	FALSE	1	0.86004	-2.58769
吉克普林国际滑雪度假区	1111001	FALSE	1	1	1
万龙滑雪场	1111110	FALSE	1	1	1

## Sheet: Truth table (low EQ)
Path	Formula	Consistency	Coverage	Unique coverage
S1	~SSQ*~REQ*AT*~NSE*~PFV	0.984	0.458	0.248
S2	SSQ*~REQ*~AT*~NSE*~TOP*SEI*PFV	0.933	0.143	0.028
S3	~SSQ*~REQ*~NSE*~TOP*~SEI*~PFV	0.996	0.335	0.118
S4	~SSQ*~REQ*~AT*NSE*~TOP*~SEI*PFV	0.997	0.157	0.034
Note	Low-EQ paths retained under the manuscript thresholds (consistency ≥ 0.80, PRI ≥ 0.70, frequency cutoff = 2).

## Sheet: Parsimonious solution (low EQ)
Solution	Expression	Solution consistency	Solution coverage
Parsimonious	SSQ*SEI*~NSE + ~REQ*~AT*NSE*~TOP + ~REQ*~NSE*~TOP*~PFV + ~SSQ*~REQ*AT*~NSE*~PFV	0.942	0.67
Path	Expression	Raw coverage	Consistency
P1	SSQ*SEI*~NSE	0.187	0.862
P2	~REQ*~AT*NSE*~TOP	0.194	0.933
P3	~REQ*~NSE*~TOP*~PFV	0.379	0.983
P4	~SSQ*~REQ*AT*~NSE*~PFV	0.458	0.984

[truncated: 6 more sheets: Intermediate solution (low EQ), Complex solution (low EQ), Case membership (low EQ), Robustness (high EQ), Robustness (low EQ), Update notes]
