# Supplementary material
Source: Research Square preprint supplement (doi:10.21203/rs.3.rs-9182910/v1)
Supplement: Supplementary file 3 [file e9c387238819aa33fc6a0335.xlsx]

## Sheet: Analytical data
Destination_name	EQ	SSQ	REQ	AT	NSE	TOP	SEI	PFV
哈尔滨热雪奇迹	0.699103	0.6528	0.8032	0.9015	0.7526	0.6018	0.8531	0.8024
哈尔滨名都滑雪场	0.65013	0.5523	0.6518	0.8521	0.6025	0.7032	0.7526	0.6519
亚布力雪都滑雪度假中心	0.705863	0.66	0.575	0.777	0.717	0.65	0.984	0.512
哈体院帽儿山滑雪场	0.681587	0.594	0.479	0.53	0.785	0.711	0.681	0.84
哈尔滨玉泉霜雪滑雪场	0.583087	0.5015	0.5517	0.7522	0.5521	0.6523	0.6016	0.5518
牡丹峰滑雪场	0.627755	0.591	0.608	0.27	0.616	0.682	0.73	0.92
平山神鹿滑雪场	0.702438	0.5522	0.6521	0.8023	0.7024	0.7028	0.7525	0.7022
玉泉威虎山滑雪场	0.607323	0.5016	0.6018	0.7521	0.602	0.6019	0.6518	0.6017
上京国际滑雪场	0.644933	0.6523	0.7022	0.5016	0.6521	0.6522	0.7524	0.6519
东村·滑雪公园	0.638073	0.4517	0.7021	0.8022	0.6019	0.6018	0.8023	0.702
天恒山冰雪运动大世界	0.647428	0.451	0.62	0.88	0.682	0.721	0.78	0.63
万峰通化滑雪度假区	0.678624	0.731	0.603	0.798	0.583	0.772	0.713	0.574
长春天定山滑雪场	0.71161	0.571	0.49	0.759	0.758	0.73	0.588	0.939
莲花山滑雪场	0.79395	0.736	0.772	0.723	0.767	0.705	0.854	0.936
长春庙香山滑雪场	0.793592	0.736	0.772	0.723	0.767	0.705	0.854	0.936
长春净月潭滑雪场	0.81643	0.782	0.81	0.851	0.823	0.75	0.831	0.802
梦都美民俗旅游度假村滑雪场	0.704115	0.653	0.701	0.62	0.751	0.71	0.76	0.731
长白山和平滑雪场	0.647902	0.538	0.356	0.597	0.491	0.736	0.896	0.696
海兰江滑雪场	0.663495	0.521	0.63	0.78	0.601	0.73	0.75	0.651
万达长白山国际滑雪场	0.731893	0.719	0.711	0.753	0.369	0.916	0.605	0.988
北大湖滑雪度假区	0.703703	0.693	0.737	0.708	0.729	0.609	0.84	0.544
长白山国际滑雪场	0.732818	0.719	0.711	0.753	0.369	0.916	0.605	0.988
长白山华美胜地山地滑雪场	0.728863	0.749	0.508	0.869	0.863	0.724	0.689	0.754
东北亚滑雪场	0.661755	0.572	0.388	0.7	0.677	0.585	0.796	0.898
棋盘山冰雪大世界	0.815578	0.827	0.785	0.852	0.834	0.767	0.812	0.807
白清寨滑雪场	0.616857	0.603	0.353	0.68	0.798	0.49	0.6	0.913
和平湾冰雪大世界	0.670177	0.582	0.623	0.902	0.652	0.723	0.752	0.682
沈阳怪坡滑雪场	0.7495	0.72	0.75	0.65	0.8	0.74	0.78	0.76
辽阳弓长岭温泉滑雪场	0.75846	0.802	0.792	0.552	0.852	0.772	0.762	0.802
五龙高尔夫滑雪场	0.61917	0.602	0.652	0.502	0.652	0.682	0.622	0.652
天桥沟滑雪场	0.7398	0.752	0.762	0.452	0.822	0.742	0.722	0.782
千山滑雪场	0.74735	0.682	0.702	0.752	0.762	0.782	0.752	0.722
何家沟滑雪场	0.61473	0.622	0.652	0.552	0.602	0.652	0.622	0.632
大连林海滑雪场	0.732	0.702	0.732	0.602	0.782	0.722	0.742	0.752
大连铭湖温泉滑雪度假园区	0.708876	0.705	0.515	0.656	0.71	0.556	0.998	0.965
南山滑雪场	0.713909	0.745	0.642	0.744	0.676	0.741	0.633	0.775
北京渔阳国际滑雪场	0.789205	0.77	0.635	0.782	0.759	0.706	0.851	0.929
大跳台	0.677361	0.71	0.549	0.554	0.462	0.758	0.599	0.97
军都山滑雪场	0.680195	0.702	0.515	0.697	0.628	0.66	0.774	0.802
蓝调庄园-滑雪场	0.660576	0.452	0.721	0.883	0.654	0.825	0.782	0.621
云居滑雪场	0.70475	0.783	0.752	0.521	0.763	0.682	0.752	0.721
北京西山滑雪场	0.703491	0.652	0.783	0.821	0.723	0.621	0.802	0.752
雪都滑雪场	0.619341	0.582	0.652	0.621	0.621	0.721	0.682	0.621
北京怀北国际滑雪场	0.705525	0.684	0.59	0.738	0.737	0.736	0.737	0.651
万科石京龙滑雪场	0.743507	0.853	0.821	0.421	0.823	0.652	0.853	0.802
八达岭滑雪场	0.639496	0.621	0.621	0.552	0.682	0.652	0.652	0.621
北京云佛山滑雪场	0.679486	0.721	0.721	0.452	0.752	0.682	0.682	0.652
华彬生态园滑雪场	0.593322	0.352	0.682	0.721	0.521	0.552	0.582	0.721
伏龙滑雪场	0.624571	0.621	0.652	0.652	0.621	0.682	0.652	0.621
太舞滑雪场	0.830593	0.904	0.91	0.98	0.712	0.824	0.624	0.792
翠云山银河滑雪场	0.659143	0.676	0.657	0.819	0.689	0.822	0.455	0.575
阿那亚拾雪川滑雪场	0.617985	0.808	0.862	0.804	0.459	0.233	0.593	0.598
多乐美地滑雪度假区	0.61347	0.631	0.506	0.548	0.598	0.666	0.578	0.604
密云苑云顶滑雪场	0.612633	0.631	0.506	0.548	0.598	0.666	0.578	0.604
万龙滑雪场	0.800685	0.813	0.851	0.818	0.768	0.784	0.781	0.695
赤峰道谷南山滑雪场	0.719502	0.726	0.708	0.685	0.712	0.698	0.732	0.705
美林谷滑雪场	0.630064	0.522	0.459	0.528	0.864	0.777	0.409	0.872
呼伦贝尔市·凤凰山滑雪中心	0.792961	0.853	0.785	0.655	0.832	0.748	0.773	0.798
金龙山滑雪场	0.69921	0.655	0.673	0.723	0.688	0.713	0.708	0.683
留坝县紫柏山国际滑雪场	0.76634	0.813	0.798	0.488	0.838	0.728	0.768	0.803
白鹿原滑雪场	0.660905	0.426	0.653	0.913	0.623	0.788	0.803	0.673
翠华山滑雪场	0.71541	0.583	0.688	0.858	0.693	0.753	0.778	0.703
西安竹林畔滑雪场	0.712365	0.638	0.713	0.783	0.723	0.738	0.758	0.698
照金国际滑雪场	0.779082	0.823	0.815	0.553	0.843	0.708	0.813	0.828
冯家塬必捷滑雪场	0.638034	0.453	0.623	0.823	0.585	0.763	0.733	0.653
太白鳌山滑雪场	0.788257	0.902	0.853	0.423	0.883	0.625	0.833	0.843
丰原必捷滑雪场	0.62946	0.438	0.618	0.798	0.593	0.773	0.723	0.648
华山国际滑雪场	0.72881	0.753	0.733	0.603	0.788	0.688	0.743	0.738
袁家村北必捷滑雪场	0.641977	0.463	0.633	0.753	0.613	0.792	0.748	0.663
维斯特滑雪场	0.721524	0.715	0.702	0.685	0.723	0.705	0.742	0.718
丝绸之路国际滑雪场	0.697264	0.635	0.533	0.767	0.652	0.742	0.765	0.729
白云滑雪场	0.703447	0.652	0.675	0.723	0.688	0.732	0.715	0.692
可可托海国际滑雪度假区	0.833865	0.726	0.716	0.696	0.991	0.724	0.908	0.951
青格里狼山国际滑雪场	0.765024	0.825	0.795	0.512	0.805	0.728	0.765	0.805
天山·天池国际滑雪场	0.756958	0.677	0.629	0.684	0.695	0.733	0.96	0.789
将军山滑雪场	0.845053	0.784	0.732	0.79	0.753	0.892	0.897	0.931
吉克普林国际滑雪度假区	0.736338	0.787	0.758	0.78	0.901	0.618	0.321	0.858
龙山国际滑雪场	0.755587	0.768	0.742	0.685	0.775	0.698	0.758	0.762
兴隆山滑雪场	0.765688	0.802	0.788	0.558	0.815	0.715	0.772	0.795
极地冰雪小镇(郑州人民公园店)	0.652595	0.385	0.675	0.935	0.585	0.782	0.815	0.682
嵩顶滑雪度假区	0.790144	0.852	0.825	0.582	0.845	0.685	0.825	0.832
郑州豫龙滑雪场	0.670089	0.592	0.658	0.785	0.672	0.755	0.762	0.705
九龙口滑雪乐园	0.610376	0.425	0.615	0.752	0.595	0.772	0.708	0.625
伊龙国际滑雪场	0.716109	0.685	0.702	0.658	0.712	0.725	0.748	0.715
倒盏村奥斯陆滑雪场	0.645812	0.412	0.632	0.825	0.608	0.812	0.775	0.665
当阳峪滑雪乐园	0.631029	0.458	0.628	0.792	0.615	0.795	0.695	0.642
黄冈桃花冲滑雪场	0.671256	0.625	0.668	0.425	0.702	0.738	0.712	0.688
英山大别山南武当滑雪场	0.716563	0.705	0.715	0.458	0.758	0.745	0.735	0.722
五峰国际滑雪场	0.728651	0.815	0.792	0.385	0.832	0.718	0.762	0.808
神农架国际滑雪场	0.759416	0.885	0.732	0.352	0.862	0.635	0.818	0.842
神农架中和滑雪场	0.741094	0.792	0.775	0.378	0.818	0.682	0.785	0.812

## Sheet: Variable mapping
Code	Full label	Description
EQ	Experience Quality	Destination-level outcome variable before calibration.
SSQ	Slope and Snow Quality	Quality of slopes, snow conditions and related skiing infrastructure.
REQ	Rental and Equipment	Adequacy and efficiency of rental services and equipment provision.
AT	Accessibility and Transport	Travel convenience and access costs associated with reaching the destination.
NSE	Natural Scenery and Environment	Scenic and environmental atmosphere perceived by visitors.
TOP	Ticketing and On-site Process	Efficiency and transparency of ticketing and on-site operational processes.
SEI	Service Encounter and Instruction	Professionalism and responsiveness of staff and instructors.
PFV	Price Fairness and Value	Visitors’ assessment of price fairness and value for money.

## Sheet: Notes
Item	Content
Purpose	This workbook provides the destination-level analytical dataset before fuzzy-set calibration.
Sample size	91 ski tourism destinations
Use in manuscript	Supports the descriptive statistics in Table 2 and serves as the basis for direct-method calibration (25th percentile, median, 75th percentile).

## Sheet: Descriptive stats
Variable	Full membership (Q3)	Crossover point (Median)	Full non-membership (Q1)
EQ	0.7423	0.7037	0.6477
SSQ	0.7525	0.677	0.5825
REQ	0.751	0.682	0.622
AT	0.791	0.721	0.5535
NSE	0.7835	0.712	0.6185
TOP	0.7515	0.721	0.682
SEI	0.7905	0.752	0.6855
PFV	0.806	0.722	0.652
