# Supplementary material
Source: Research Square preprint supplement (doi:10.21203/rs.3.rs-9182910/v1)
Supplement: Supplementary file 4 [file eca1e80b11aa97f13252a734.xlsx]

## Sheet: Supplementary Data 1. Ski-relat
OID_	id	province	city	city_or_prefecture	city_display	county_or_district	resort_name_cn	amap_address	indoor_outdoor	resource_type	industry_type	data_source	经度	纬度	amap_id	city_clean	冰雪资源类型	res_type_code	multi_year_winter_mean_snow_depth_cm	winter_mean_temp	snow_score	temp_score	resource_index	resource_class	gdp_2024_万元_	F2020旅游收入_万亿_	常住人口_万人_	F2023路网密度	gdp_2024_万元__标准化	F2020旅游收入_万亿__标准化	常住人口_万人__标准化	F2023路网密度_标准化	产业根植性指数	res_hi	ind_hi	combo_type
1	382	广东省	东莞市	东莞市	东莞市	东莞市	奇幻冰雪世界(虎门万达店)	虎门镇连升北路万达购物广场1号门3楼(万达影院楼下)	室内	待划分	城市综合体室内雪场型	GaodeAPI_text(冰雪世界)	113.684	22.8341	B0K0J5BB0S	东莞市	低海拔人工造雪型	3	0	17.3856	0	0	0	Ⅰ 很低	122821500	358.63	1048.53	5.03387	0.227756	0.107522	0.489899	0.606915	0.358023	0	1	Ⅲ类 低资源-高产业型
2	398	广东省	汕尾市	汕尾市	汕尾市	城区	冰雪世界	241省道红海湾遮浪奇观旅游区内	室内	待划分	城市综合体室内雪场型	GaodeAPI_text(冰雪乐园)	115.57	22.6606	B0HBLG8BXU	汕尾市	低海拔人工造雪型	3	0	16.8216	0	0.0179029	0.00716115	Ⅰ 很低	15008900	69.02	269.13	0.927175	0.027832	0.0206932	0.125744	0.105449	0.0699295	0	0	Ⅳ类 低资源-低产业型
3	712	海南省	海口市	海口市	海口市	美兰区	雪乐山室内滑雪(北海岸店)	海甸岛人民大道88号	室内	待划分	城市综合体室内雪场型	GaodeAPI_text(滑雪训练)	110.336	20.0676	B0G3A48EYJ	海口市	低海拔人工造雪型	3	0	16.6525	0	0.0232701	0.00930805	Ⅰ 很低	24706300	201.39	300.16	2.14141	0.0458146	0.0603796	0.140242	0.253718	0.125039	0	0	Ⅳ类 低资源-低产业型
4	392	广东省	广州市	广州市	广州市	白云区	Snow Show雪秀·城市滑雪(白云店)	百顺北路1号云门New Park商场三楼L319	待识别	待划分	城市综合体室内雪场型	GaodeAPI_text(滑雪训练)	113.292	23.2362	B0LBXSI18K	广州市	低海拔人工造雪型	3	0	16.4045	0	0.0311429	0.0124572	Ⅰ 很低	310325000	2679.07	1882.7	3.98867	0.575457	0.803223	0.879643	0.479286	0.684402	0	1	Ⅲ类 低资源-高产业型
5	402	广东省	深圳市	深圳市	深圳市	南山区	四季滑雪(南山店)	金鸡路1-31号七巧国1层	待识别	待划分	城郊体验型	GaodeAPI_text(滑雪场)	113.923	22.533	B0KDJC0UGS	深圳市	低海拔人工造雪型	3	0	15.9787	0	0.0446581	0.0178632	Ⅰ 很低	368018700	1383.74	1779.01	8.25299	0.682442	0.414865	0.831197	1	0.732126	0	1	Ⅲ类 低资源-高产业型
6	404	广东省	深圳市	深圳市	深圳市	南山区	阿尔卑斯冰雪世界	深南大道9037号(世界之窗欧陆风情酒吧街)	室内	待划分	城市综合体室内雪场型	GaodeAPI_text(滑雪场)	113.973	22.5345	B0FFGQ1RH9	深圳市	低海拔人工造雪型	3	0	15.7452	0	0.0520686	0.0208274	Ⅰ 很低	368018700	1383.74	1779.01	8.25299	0.682442	0.414865	0.831197	1	0.732126	0	1	Ⅲ类 低资源-高产业型
7	763	福建省	龙岩市	龙岩市	龙岩市	长汀县	伊利·冰雪世界(兆征路店)	兆征路96-13号	室内	待划分	城市综合体室内雪场型	GaodeAPI_text(冰雪世界)	116.351	25.8362	B0J0MC14SZ	龙岩市	低海拔人工造雪型	3	0	15.6289	0	0.0557621	0.0223048	Ⅰ 很低	34186800	402.27	269.3	0.512425	0.0633949	0.120606	0.125823	0.0548037	0.0911571	0	0	Ⅳ类 低资源-低产业型
8	770	贵州省	贵阳市	贵阳市	贵阳市	花溪区	花溪云顶滑雪场	高坡乡云顶花海景区内	待识别	待划分	城郊体验型	GaodeAPI_text(滑雪场)	106.839	26.2743	B0FFHMTJVW	贵阳市	低海拔人工造雪型	3	0	15.0988	0	0.0725894	0.0290358	Ⅰ 很低	57774100	1619.8	640.29	1.10069	0.107134	0.485639	0.299159	0.126636	0.254642	0	1	Ⅲ类 低资源-高产业型
9	399	广东省	河源市	河源市	河源市	源城区	河源梦幻冰雪大世界(暂停营业)	客天下大道1号客天下国际大酒店一层内	待识别	待划分	城市综合体室内雪场型	GaodeAPI_text(冰雪乐园)	114.63	23.6266	B0I1NM3M13	河源市	低海拔人工造雪型	3	0	14.6675	0	0.0862788	0.0345115	Ⅰ 很低	14077200	53.35	283.83	0.479998	0.0261043	0.0159951	0.132612	0.0508441	0.0563889	0	0	Ⅳ类 低资源-低产业型
10	393	广东省	广州市	广州市	广州市	花都区	广州热雪奇迹	新华平步大道融创文旅城内	室内	待划分	城市综合体室内雪场型	GaodeAPI_text(融创雪世界)	113.233	23.4277	B0FFKJ04AN	广州市	低海拔人工造雪型	3	0	14.3844	0	0.0952635	0.0381054	Ⅰ 很低	310325000	2679.07	1882.7	3.98867	0.575457	0.803223	0.879643	0.479286	0.684402	0	1	Ⅲ类 低资源-高产业型
11	410	广东省	深圳市	深圳市	深圳市	龙华区	卡鲁冰雪世界	观澜湖生态运动公社内	室内	待划分	城市综合体室内雪场型	GaodeAPI_text(滑雪中心)	114.08	22.718	B0H1U91IUN	深圳市	低海拔人工造雪型	3	0	14.3539	0	0.0962331	0.0384932	Ⅰ 很低	368018700	1383.74	1779.01	8.25299	0.682442	0.414865	0.831197	1	0.732126	0	1	Ⅲ类 低资源-高产业型
12	396	广东省	广州市	广州市	广州市	越秀区	SNOWGATExJSKI室内滑雪模拟中心(北京路店)	中山四路317号东山印象台201房自编200-1	室内	待划分	城市综合体室内雪场型	GaodeAPI_text(滑雪场)	113.272	23.1256	B0JU2M1LCQ	广州市	低海拔人工造雪型	3	0	13.7333	0	0.115932	0.0463728	Ⅰ 很低	310325000	2679.07	1882.7	3.98867	0.575457	0.803223	0.879643	0.479286	0.684402	0	1	Ⅲ类 低资源-高产业型
13	391	广东省	广州市	广州市	广州市	海珠区	四季滑雪	新港西路新港中路354号大院11号	待识别	待划分	城郊体验型	GaodeAPI_text(滑雪场)	113.322	23.0949	B0J1RCR11O	广州市	低海拔人工造雪型	3	0	13.46	0	0.124608	0.049843	Ⅰ 很低	310325000	2679.07	1882.7	3.98867	0.575457	0.803223	0.879643	0.479286	0.684402	0	1	Ⅲ类 低资源-高产业型
14	407	广东省	深圳市	深圳市	深圳市	宝安区	乐漫冰雪王国(海雅缤纷城)	宝民一路99号海雅缤纷城L4层	待识别	待划分	城市综合体室内雪场型	GaodeAPI_text(冰雪世界)	113.906	22.5604	B0G35HV7Z1	深圳市	低海拔人工造雪型	3	0	13.2573	0	0.131041	0.0524164	Ⅰ 很低	368018700	1383.74	1779.01	8.25299	0.682442	0.414865	0.831197	1	0.732126	0	1	Ⅲ类 低资源-高产业型
15	408	广东省	深圳市	深圳市	深圳市	宝安区	华发冰雪热雪奇迹	沙井南环路(会展城地铁站D口步行400米)	室内	待划分	城市综合体室内雪场型	GaodeAPI_text(华发冰雪世界)	113.769	22.7153	B0LA5ZQDSF	深圳市	低海拔人工造雪型	3	0	13.2045	0	0.132718	0.053087	Ⅰ 很低	368018700	1383.74	1779.01	8.25299	0.682442	0.414865	0.831197	1	0.732126	0	1	Ⅲ类 低资源-高产业型
16	390	广东省	广州市	广州市	广州市	天河区	北极小镇冰雪乐园(暂停营业)	天河路299号时尚天河商业广场中C区北极小镇冰雪乐园	室内	待划分	城市综合体室内雪场型	GaodeAPI_text(冰雪世界)	113.325	23.1366	B0FFLDTFSK	广州市	低海拔人工造雪型	3	0	13.0406	0	0.13792	0.055168	Ⅰ 很低	310325000	2679.07	1882.7	3.98867	0.575457	0.803223	0.879643	0.479286	0.684402	0	1	Ⅲ类 低资源-高产业型
17	403	广东省	深圳市	深圳市	深圳市	南山区	奇幻冰雪营地(暂停营业)	侨城西街1号欢乐谷内	待识别	待划分	城郊体验型	GaodeAPI_text(滑雪场)	113.98	22.539	B0FFH0YWWX	深圳市	低海拔人工造雪型	3	0	13.0366	0	0.138046	0.0552185	Ⅰ 很低	368018700	1383.74	1779.01	8.25299	0.682442	0.414865	0.831197	1	0.732126	0	1	Ⅲ类 低资源-高产业型
18	21	云南省	曲靖市	曲靖市	曲靖市	会泽县	大海草山国际滑雪场(暂停营业)	大海乡大海草山风景区内	待识别	待划分	滑雪+度假综合型	GaodeAPI_text(滑雪度假区)	103.285	26.2059	B0FFIR8EKM	曲靖市	低海拔人工造雪型	3	0	12.9701	0	0.140158	0.0560632	Ⅰ 很低	36772200	367.68	568.8	0.501652	0.0681892	0.110236	0.265757	0.0534882	0.124418	0	0	Ⅳ类 低资源-低产业型
19	412	广东省	深圳市	深圳市	深圳市	龙华区	奇幻冰雪世界	华荣路后浪新天地7栋4楼	室内	待划分	城市综合体室内雪场型	GaodeAPI_text(冰雪世界)	113.995	22.6778	B0KAU5HV5S	深圳市	低海拔人工造雪型	3	0	12.8588	0	0.143692	0.0574769	Ⅰ 很低	368018700	1383.74	1779.01	8.25299	0.682442	0.414865	0.831197	1	0.732126	0	1	Ⅲ类 低资源-高产业型
20	409	广东省	深圳市	深圳市	深圳市	福田区	SNOWGATExDEEPSNOW滑雪·华雪梦(会展中心店)	福华一路1号BitCity次元小镇F1层	待识别	待划分	城郊体验型	GaodeAPI_text(滑雪场)	114.062	22.5365	B0J1H5C37I	深圳市	低海拔人工造雪型	3	0	12.3678	0	0.159277	0.0637109	Ⅰ 很低	368018700	1383.74	1779.01	8.25299	0.682442	0.414865	0.831197	1	0.732126	0	1	Ⅲ类 低资源-高产业型
21	400	广东省	深圳市	深圳市	深圳市	南山区	SNOW51城市滑雪(万象前海店)	桂湾四路169号万象前海购物中心B1层133SNOW51滑雪	待识别	待划分	城市综合体室内雪场型	GaodeAPI_text(滑雪场)	113.899	22.5308	B0HKNSPKY1	深圳市	低海拔人工造雪型	3	0	12.3345	0	0.160333	0.0641334	Ⅰ 很低	368018700	1383.74	1779.01	8.25299	0.682442	0.414865	0.831197	1	0.732126	0	1	Ⅲ类 低资源-高产业型
22	761	福建省	福州市	福州市	福州市	连江县	冰雪世界	贵安新天地休闲旅游度假区	室内	待划分	城市综合体室内雪场型	GaodeAPI_text(雪世界)	119.4	26.2433	B0KUFC8LMT	福州市	低海拔人工造雪型	3	0	12.1132	0	0.167358	0.0669431	Ⅰ 很低	142367600	921.89	846.9	2.38327	0.264002	0.276396	0.395692	0.283251	0.304835	0	1	Ⅲ类 低资源-高产业型
23	406	广东省	深圳市	深圳市	深圳市	南山区	雪尔马特室内滑雪	科技南路滨福世纪广场2楼(科苑地铁站B口步行420米)	室内	待划分	城市综合体室内雪场型	GaodeAPI_text(滑雪场)	113.949	22.5252	B0IRPC7Q7S	深圳市	低海拔人工造雪型	3	0	12.0791	0	0.168441	0.0673764	Ⅰ 很低	368018700	1383.74	1779.01	8.25299	0.682442	0.414865	0.831197	1	0.732126	0	1	Ⅲ类 低资源-高产业型
24	416	广西壮族自治区	桂林市	桂林市	桂林市	灌阳县	北纬25°滑雪度假区(暂停营业)	宝盖山云湖路	待识别	待划分	滑雪+度假综合型	GaodeAPI_text(滑雪度假区)	110.978	25.5522	B0K6UCU1NU	桂林市	低海拔人工造雪型	3	0	12.0373	0	0.169766	0.0679066	Ⅰ 很低	25173900	1233.54	495.07	0.584336	0.0466817	0.369833	0.231309	0.0635848	0.177852	0	1	Ⅲ类 低资源-高产业型
25	414	广西壮族自治区	柳州市	柳州市	柳州市	柳南区	柳州冰雪大世界	动物园-百鸟园西南侧70米	待识别	待划分	城市综合体室内雪场型	GaodeAPI_text(冰雪世界)	109.406	24.2625	B0KUNZC45W	柳州市	低海拔人工造雪型	3	0	11.9896	0	0.171281	0.0685124	Ⅰ 很低	29506700	602.01	415.35	0.517402	0.0547163	0.180491	0.194062	0.0554115	0.12117	0	0	Ⅳ类 低资源-低产业型
26	772	贵州省	贵阳市	贵阳市	贵阳市	观山湖区	雪乐山滑雪SKINOW	金朱东路麦田成长中心负一层	室内	待划分	城市综合体室内雪场型	GaodeAPI_text(滑雪场)	106.637	26.6559	B0FFLIT9I0	贵阳市	低海拔人工造雪型	3	0	11.9413	0	0.172814	0.0691254	Ⅰ 很低	57774100	1619.8	640.29	1.10069	0.107134	0.485639	0.299159	0.126636	0.254642	0	1	Ⅲ类 低资源-高产业型
27	388	广东省	佛山市	佛山市	佛山市	顺德区	长鹿冰雪世界	伦教建设东路8号	室内	待划分	城市综合体室内雪场型	GaodeAPI_text(滑雪场)	113.286	22.8775	B0FFLBD3F8	佛山市	低海拔人工造雪型	3	0	11.9163	0	0.173608	0.0694433	Ⅰ 很低	133619000	325.05	961.54	4.77243	0.247779	0.0974546	0.449255	0.574991	0.34237	0	1	Ⅲ类 低资源-高产业型
28	753	福建省	厦门市	厦门市	厦门市	思明区	冰雪世界	观音山商业街环岛东路2188-1号	室内	待划分	城市综合体室内雪场型	GaodeAPI_text(冰雪世界)	118.198	24.4978	B0FFHBIUBF	厦门市	低海拔人工造雪型	3	0	11.9154	0	0.173635	0.0694542	Ⅰ 很低	85890100	1045.8	532.7	4.42498	0.159272	0.313546	0.24889	0.532564	0.313568	0	1	Ⅲ类 低资源-高产业型
29	385	广东省	佛山市	佛山市	佛山市	南海区	冰极人冰雪大世界	桂业路88号金铂中心B1层	待识别	待划分	城市综合体室内雪场型	GaodeAPI_text(冰雪世界)	113.156	23.0114	B0LR6ZFRY3	佛山市	低海拔人工造雪型	3	0	11.6512	0	0.182023	0.0728092	Ⅰ 很低	133619000	325.05	961.54	4.77243	0.247779	0.0974546	0.449255	0.574991	0.34237	0	1	Ⅲ类 低资源-高产业型
30	384	广东省	中山市	中山市	中山市	中山市	冬夏同在·冰雪世界游乐园(建设中)	菊城大道西与九洲大道交叉口西北240米	室内	待划分	城市综合体室内雪场型	GaodeAPI_text(雪世界)	113.227	22.6495	B0LB3CCHR4	中山市	低海拔人工造雪型	3	0	11.489	0	0.187172	0.0748688	Ⅰ 很低	41432500	120.45	445.82	4.90655	0.0768311	0.0361126	0.208298	0.591368	0.228152	0	1	Ⅲ类 低资源-高产业型
31	767	贵州省	六盘水市	六盘水市	六盘水市	盘州市	乌蒙滑雪场	坪地乡小树林村乌蒙大草原景区内	待识别	待划分	城市综合体室内雪场型	GaodeAPI_text(冰雪世界)	104.612	26.1549	B0FFJB6BVX	六盘水市	低海拔人工造雪型	3	0	11.4843	0	0.187321	0.0749283	Ⅰ 很低	17105900	250.5	302.85	0.874457	0.0317206	0.0751034	0.141499	0.0990113	0.0868336	0	0	Ⅳ类 低资源-低产业型
32	181	四川省	成都市	成都市	成都市	新都区	新都尖锋旱雪四季滑雪场	[]	待识别	待划分	城郊体验型	GaodeAPI_text(滑雪场)	104.101	30.8478	B0JULRW93G	成都市	低海拔人工造雪型	3	0	11.3943	0	0.190179	0.0760715	Ⅰ 很低	235113000	3005.2	2140.3	3.17627	0.435986	0.901001	1	0.380084	0.679268	0	1	Ⅲ类 低资源-高产业型
33	394	广东省	广州市	广州市	广州市	花都区	滑雪之后	凤凰北路63号广州融创茂商业中心室外步行街层(W1058)号商铺	待识别	待划分	城郊体验型	GaodeAPI_text(滑雪中心)	113.234	23.4285	B0LGALHH44	广州市	低海拔人工造雪型	3	0	11.3291	0	0.192247	0.076899	Ⅰ 很低	310325000	2679.07	1882.7	3.98867	0.575457	0.803223	0.879643	0.479286	0.684402	0	1	Ⅲ类 低资源-高产业型
34	383	广东省	东莞市	东莞市	东莞市	东莞市	海之韵冰雪世界(大和国际购物中心店)	大朗镇富民中路399号大和国际购物中心	室内	待划分	城市综合体室内雪场型	GaodeAPI_text(冰雪世界)	113.935	22.9272	B0JDR4PIDJ	东莞市	低海拔人工造雪型	3	0	11.3075	0	0.192933	0.0771733	Ⅰ 很低	122821500	358.63	1048.53	5.03387	0.227756	0.107522	0.489899	0.606915	0.358023	0	1	Ⅲ类 低资源-高产业型
35	23	云南省	楚雄彝族自治州	楚雄彝族自治州	楚雄彝族自治州	禄丰市	智龙冰雪世界(暂停开放)	恐龙山镇老长箐世界恐龙谷内(北侧)	室内	待划分	城市综合体室内雪场型	GaodeAPI_text(冰雪世界)	102.075	24.9765	B0GDHR2TTN	楚雄彝族自治州	低海拔人工造雪型	3	0	11.2557	0	0.194577	0.0778307	Ⅰ 很低			234.2	0.446935			0.109424	0.0468068	0.0781153	0	0	Ⅳ类 低资源-低产业型
36	415	广西壮族自治区	桂林市	桂林市	桂林市	全州县	广西桂林全州天湖生态旅游度假区-冰雪世界滑雪场(暂停营业)	桂林天湖	室内	待划分	城市综合体室内雪场型	GaodeAPI_text(滑雪场)	110.905	26.1388	B0FFIS829G	桂林市	低海拔人工造雪型	3	0	11.1267	0	0.198671	0.0794683	Ⅰ 很低	25173900	1233.54	495.07	0.584336	0.0466817	0.369833	0.231309	0.0635848	0.177852	0	1	Ⅲ类 低资源-高产业型
37	389	广东省	广州市	广州市	广州市	增城区	欢乐湾冰雪王国	荔湖街连江路68号	待识别	待划分	城市综合体室内雪场型	GaodeAPI_text(冰雪世界)	113.832	23.2444	B0K0DU9HIW	广州市	低海拔人工造雪型	3	0	11.1267	0	0.198673	0.0794693	Ⅰ 很低	310325000	2679.07	1882.7	3.98867	0.575457	0.803223	0.879643	0.479286	0.684402	0	1	Ⅲ类 低资源-高产业型
38	411	广东省	深圳市	深圳市	深圳市	龙华区	卡鲁滑雪大师学院 (卡鲁冰雪世界店)	观澜湖生态运动公社入园后步行180米卡鲁冰雪世界内	室内	待划分	城市综合体室内雪场型	GaodeAPI_text(滑雪场)	114.08	22.718	B0JDYHOSCQ	深圳市	低海拔人工造雪型	3	0	10.9729	0	0.203554	0.0814217	Ⅰ 很低	368018700	1383.74	1779.01	8.25299	0.682442	0.414865	0.831197	1	0.732126	0	1	Ⅲ类 低资源-高产业型
39	18	云南省	昆明市	昆明市	昆明市	禄劝彝族苗族自治县	轿子雪山室外滑雪场	乌蒙乡东北角轿子雪山景区	待识别	待划分	城郊体验型	GaodeAPI_text(滑雪场)	102.821	26.0552	B0FFIS0DBS	昆明市	低海拔人工造雪型	3	0	10.7999	0	0.209045	0.0836181	Ⅰ 很低	82752200	1900.57	868	1.42585	0.153453	0.569818	0.405551	0.166341	0.323791	0	1	Ⅲ类 低资源-高产业型
40	526	江西省	吉安市	吉安市	吉安市	吉州区	七星雪冰雪王国(暂停营业)	白塘街道东塘大道与阳明西路交叉路口往西北约220米	待识别	待划分	城市综合体室内雪场型	GaodeAPI_text(冰雪世界)	114.956	27.1265	B0IKJ775P8	吉安市	低海拔人工造雪型	3	0	10.7315	0	0.211217	0.0844869	Ⅰ 很低	29172700	783.86	438.61	0.477859	0.0540969	0.235012	0.204929	0.0505829	0.136155	0	1	Ⅲ类 低资源-高产业型
41	395	广东省	广州市	广州市	广州市	花都区	融创雪世界玩乐	凤凰北路与杜鹃二街交叉口西北260米	室内	待划分	城市综合体室内雪场型	GaodeAPI_text(融创雪世界)	113.233	23.4307	B0I11Y7QF8	广州市	低海拔人工造雪型	3	0	10.6841	0	0.212721	0.0850883	Ⅰ 很低	310325000	2679.07	1882.7	3.98867	0.575457	0.803223	0.879643	0.479286	0.684402	0	1	Ⅲ类 低资源-高产业型
42	25	云南省	玉溪市	玉溪市	玉溪市	红塔区	承德峡谷水乡冰雪大世界	彩虹路与中卫东路交叉口东南100米	待识别	待划分	城市综合体室内雪场型	GaodeAPI_text(冰雪世界)	102.538	24.3594	B0KUFCY0MD	玉溪市	低海拔人工造雪型	3	0	10.5749	0	0.216187	0.0864747	Ⅰ 很低	25820500	266.21	226.5	0.640013	0.0478807	0.0798135	0.105826	0.0703834	0.075976	0	0	Ⅳ类 低资源-低产业型
43	758	福建省	漳州市	漳州市	漳州市	东山县	东山岛冰雪乐园	康美镇马銮湾景区对面	室内	待划分	城市综合体室内雪场型	GaodeAPI_text(冰雪世界)	117.497	23.7292	B0HU6S2ESD	漳州市	低海拔人工造雪型	3	0	10.3718	0	0.222634	0.0890535	Ⅰ 很低	60637100	424.08	506.3	1.17176	0.112444	0.127145	0.236556	0.135315	0.152865	0	1	Ⅲ类 低资源-高产业型
44	755	福建省	厦门市	厦门市	厦门市	湖里区	海上世界雪亦世界滑雪场	厦门海上世界购物中心3楼	待识别	待划分	城郊体验型	GaodeAPI_text(滑雪场)	118.077	24.4924	B0JA29L48O	厦门市	低海拔人工造雪型	3	0	10.3236	0	0.224164	0.0896655	Ⅰ 很低	85890100	1045.8	532.7	4.42498	0.159272	0.313546	0.24889	0.532564	0.313568	0	1	Ⅲ类 低资源-高产业型
45	417	广西壮族自治区	梧州市	梧州市	梧州市	龙圩区	启迪鸿星梧州雪立方冰雪世界	天水路10号合景启迪冰雪小镇	室内	待划分	城市综合体室内雪场型	GaodeAPI_text(冰雪世界)	111.246	23.391	B0G369ML6N	梧州市	低海拔人工造雪型	3	0	10.2667	0	0.225972	0.0903888	Ⅰ 很低	16224900	331.14	283.3	0.386038	0.0300869	0.0992804	0.132365	0.0393707	0.0752757	0	0	Ⅳ类 低资源-低产业型
46	714	湖北省	宜昌市	宜昌市	宜昌市	五峰土家族自治县	五峰国际滑雪场(暂停营业)	湾潭镇茅庄村二组	待识别	待划分	城郊体验型	GaodeAPI_text(滑雪基地)	110.502	30.134	B0FFJ8SFQC	宜昌市	低海拔人工造雪型	3	0	10.0917	0	0.231526	0.0926106	Ⅰ 很低	61911200	695.1	392.4	0.711579	0.114806	0.208401	0.183339	0.0791223	0.146417	0	1	Ⅲ类 低资源-高产业型
47	405	广东省	深圳市	深圳市	深圳市	南山区	雪域鑫潮·室内滑雪连锁品牌(深圳湾店)	白石三道与深湾二路交汇处深湾睿云中心深圳湾睿印RAIL INB1层	室内	待划分	城市综合体室内雪场型	GaodeAPI_text(滑雪中心)	113.97	22.5236	B0KB2KG909	深圳市	低海拔人工造雪型	3	0	10.0903	0	0.231569	0.0926274	Ⅰ 很低	368018700	1383.74	1779.01	8.25299	0.682442	0.414865	0.831197	1	0.732126	0	1	Ⅲ类 低资源-高产业型
48	765	贵州省	六盘水市	六盘水市	六盘水市	水城区	六盘水梅花山国际滑雪场(暂停营业)	湾子大山	待识别	待划分	城郊体验型	GaodeAPI_text(滑雪中心)	104.746	26.5999	B0FFGNHARQ	六盘水市	低海拔人工造雪型	3	0	10.0618	0	0.232476	0.0929904	Ⅰ 很低	17105900	250.5	302.85	0.874457	0.0317206	0.0751034	0.141499	0.0990113	0.0868336	0	0	Ⅳ类 低资源-低产业型
49	754	福建省	厦门市	厦门市	厦门市	思明区	雪乐山室内滑雪(CocoPark店)	星河CocoPark商场3楼L3-032	室内	待划分	城市综合体室内雪场型	GaodeAPI_text(冰雪世界)	118.189	24.4751	B0JKHSXT0C	厦门市	低海拔人工造雪型	3	0	10.0512	0	0.232812	0.0931248	Ⅰ 很低	85890100	1045.8	532.7	4.42498	0.159272	0.313546	0.24889	0.532564	0.313568	0	1	Ⅲ类 低资源-高产业型
50	16	云南省	昆明市	昆明市	昆明市	官渡区	RX城市滑雪空间(世纪金源购物中心店)(暂停营业)	世纪金源购物中心B馆1层右侧(原车立方内)	待识别	待划分	城市综合体室内雪场型	GaodeAPI_text(滑雪场)	102.763	24.9776	B0IRXA1Q23	昆明市	低海拔人工造雪型	3	0	9.99512	0	0.234591	0.0938365	Ⅰ 很低	82752200	1900.57	868	1.42585	0.153453	0.569818	0.405551	0.166341	0.323791	0	1	Ⅲ类 低资源-高产业型
51	769	贵州省	贵阳市	贵阳市	贵阳市	云岩区	ONESKI滑雪馆	宝山北路372号	待识别	待划分	城市综合体室内雪场型	GaodeAPI_text(滑雪场)	106.719	26.595	B0JRMZFAWI	贵阳市	低海拔人工造雪型	3	0	9.94042	0	0.236328	0.094531	Ⅰ 很低	57774100	1619.8	640.29	1.10069	0.107134	0.485639	0.299159	0.126636	0.254642	0	1	Ⅲ类 低资源-高产业型
52	419	广西壮族自治区	玉林市	玉林市	玉林市	容县	大容山国家森林公园雪乐源滑雪馆	大容山国家森林公园	待识别	待划分	城市综合体室内雪场型	GaodeAPI_text(滑雪场)	110.273	22.8783	B0H0RZCNSK	玉林市	低海拔人工造雪型	3	0	9.89887	0	0.237646	0.0950585	Ⅰ 很低	23467800	570.16	582.41	0.530817	0.043518	0.170942	0.272116	0.0570496	0.135906	0	0	Ⅳ类 低资源-低产业型
53	401	广东省	深圳市	深圳市	深圳市	南山区	kkpark滑雪场(世界之窗店)	深南大道9037号	待识别	待划分	城郊体验型	GaodeAPI_text(滑雪场)	113.973	22.5347	B0KAFCMIX6	深圳市	低海拔人工造雪型	3	0	9.84319	0	0.239414	0.0957656	Ⅰ 很低	368018700	1383.74	1779.01	8.25299	0.682442	0.414865	0.831197	1	0.732126	0	1	Ⅲ类 低资源-高产业型
54	774	贵州省	黔南布依族苗族自治州	黔南布依族苗族自治州	黔南布依族苗族自治州	龙里县	龙里油画大草原滑雪场	龙里油画大草原景区内	待识别	待划分	城郊体验型	GaodeAPI_text(滑雪场)	106.916	26.3966	B0H0CUVSRC	黔南布依族苗族自治州	低海拔人工造雪型	3	0	9.80106	0	0.240751	0.0963005	Ⅰ 很低			348.96	0.455831			0.163043	0.0478931	0.105468	0	0	Ⅳ类 低资源-低产业型
55	771	贵州省	贵阳市	贵阳市	贵阳市	花溪区	贵阳奇幻冰雪王国(暂停开放)	青岩镇青岩古镇北门新桥旁	待识别	待划分	城市综合体室内雪场型	GaodeAPI_text(冰雪王国)	106.691	26.338	B0FFL9NHGB	贵阳市	低海拔人工造雪型	3	0	9.73048	0	0.242992	0.0971966	Ⅰ 很低	57774100	1619.8	640.29	1.10069	0.107134	0.485639	0.299159	0.126636	0.254642	0	1	Ⅲ类 低资源-高产业型
56	687	浙江省	丽水市	丽水市	丽水市	青田县	奇想探索乐园·室内滑雪场	高市乡高市村1号	室内	待划分	城市综合体室内雪场型	GaodeAPI_text(冰雪世界)	120.133	28.2617	B0FFGY7MTT	丽水市	低海拔人工造雪型	3	0	9.67304	0	0.244815	0.0979259	Ⅰ 很低	21811800	655.99	252.8	0.634258	0.0404471	0.196675	0.118114	0.0696807	0.106229	0	0	Ⅳ类 低资源-低产业型
57	716	湖北省	武汉市	武汉市	武汉市	武昌区	冰雪乐园(武商梦时代店)	武商梦时代购物中心	室内	待划分	城市综合体室内雪场型	GaodeAPI_text(滑雪场)	114.341	30.5287	B0I0MZ20LJ	武汉市	低海拔人工造雪型	3	0	9.62766	0	0.246255	0.0985021	Ⅰ 很低	211062300	2906.29	1377.4	2.85035	0.391387	0.871347	0.643555	0.340286	0.561644	0	1	Ⅲ类 低资源-高产业型
58	22	云南省	曲靖市	曲靖市	曲靖市	会泽县	大海草山国际滑雪度假区	大海乡东南部大海草山	待识别	待划分	滑雪+度假综合型	GaodeAPI_text(滑雪度假区)	103.279	26.2037	B0IACMK6LN	曲靖市	低海拔人工造雪型	3	0	9.5892	0	0.247476	0.0989904	Ⅰ 很低	36772200	367.68	568.8	0.501652	0.0681892	0.110236	0.265757	0.0534882	0.124418	0	0	Ⅳ类 低资源-低产业型
59	816	重庆市	重庆市	重庆市	重庆市	沙坪坝区	重庆融创雪世界(暂停营业)	西林大道84号融创茂F1层	室内	待划分	城市综合体室内雪场型	GaodeAPI_text(融创雪世界)	106.358	29.6251	B0K2OMYEO3	重庆市	低海拔人工造雪型	3	0	9.54146	0	0.248991	0.0995965	Ⅰ 很低	321931500	0		0.99409	0.59698	0		0.11362	0.236866	0	1	Ⅲ类 低资源-高产业型
60	808	重庆市	重庆市	重庆市	重庆市	南川区	重庆金佛山滑雪场	金佛山风景区内	待识别	待划分	城郊体验型	GaodeAPI_text(滑雪场)	107.189	29.0377	B00179AC15	重庆市	低海拔人工造雪型	3	0	9.42337	0	0.25274	0.101096	Ⅰ 很低	321931500	0		0.99409	0.59698	0		0.11362	0.236866	0	1	Ⅲ类 低资源-高产业型
61	759	福建省	漳州市	漳州市	漳州市	漳浦县	冰雪世界	六鳌半岛鳌西村六鳌翡翠湾景区内	室内	待划分	城市综合体室内雪场型	GaodeAPI_text(冰雪世界)	117.773	23.9448	B0FFGA4VU4	漳州市	低海拔人工造雪型	3	0	9.32518	0	0.255857	0.102343	Ⅰ 很低	60637100	424.08	506.3	1.17176	0.112444	0.127145	0.236556	0.135315	0.152865	0	1	Ⅲ类 低资源-高产业型
62	17	云南省	昆明市	昆明市	昆明市	晋宁区	梦幻冰雪城	七彩云南·欢乐世界内	室内	待划分	城市综合体室内雪场型	GaodeAPI_text(冰雪世界)	102.739	24.7693	B0G30PGVCC	昆明市	低海拔人工造雪型	3	0	9.27733	0	0.257376	0.10295	Ⅰ 很低	82752200	1900.57	868	1.42585	0.153453	0.569818	0.405551	0.166341	0.323791	0	1	Ⅲ类 低资源-高产业型
63	19	云南省	昆明市	昆明市	昆明市	西山区	昆明热雪奇迹	碧鸡路2999-2	室内	待划分	城市综合体室内雪场型	GaodeAPI_text(滑雪场)	102.65	25.0154	B0FFLIWWOR	昆明市	低海拔人工造雪型	3	0	9.27042	0	0.257595	0.103038	Ⅰ 很低	82752200	1900.57	868	1.42585	0.153453	0.569818	0.405551	0.166341	0.323791	0	1	Ⅲ类 低资源-高产业型
64	703	浙江省	温州市	温州市	温州市	文成县	天鹅堡滑雪场	铜铃山镇体育场路12号	待识别	待划分	城市综合体室内雪场型	GaodeAPI_text(冰雪世界)	119.837	27.8619	B0FFIRHCUR	温州市	低海拔人工造雪型	3	0	9.23379	0	0.258758	0.103503	Ⅰ 很低	97188500	1294.1	976.1	2.0831	0.180223	0.387989	0.456058	0.246598	0.317717	0	1	Ⅲ类 低资源-高产业型
65	397	广东省	梅州市	梅州市	梅州市	兴宁市	熙和湾冰雪世界	永和镇兴宁熙和湾客乡文化旅游产业园内(东侧)	室内	待划分	城市综合体室内雪场型	GaodeAPI_text(冰雪乐园)	115.832	24.134	B0FFLMLWPS	梅州市	低海拔人工造雪型	3	0	9.22162	0	0.259144	0.103658	Ⅰ 很低	15081800	106.96	384.91	1.48568	0.0279672	0.0320681	0.179839	0.173648	0.103381	0	0	Ⅳ类 低资源-低产业型
66	528	江西省	宜春市	宜春市	宜春市	铜鼓县	七星岭国际滑雪场(暂停营业)	排埠镇七星岭	待识别	待划分	城郊体验型	GaodeAPI_text(滑雪场)	114.193	28.4378	B0FFGM00TD	宜春市	低海拔人工造雪型	3	0	9.16147	0	0.261053	0.104421	Ⅰ 很低	37110500	1017.29	494.43	0.659084	0.0688165	0.304998	0.23101	0.0727122	0.169384	0	1	Ⅲ类 低资源-高产业型
67	803	重庆市	重庆市	重庆市	重庆市	两江新区	重庆环球游乐城冰雪大世界(暂停营业)	回兴服装城大道圣名世贸城内	待识别	待划分	城市综合体室内雪场型	GaodeAPI_text(冰雪世界)	106.617	29.6555	B0FFIBHJMU	重庆市	低海拔人工造雪型	3	0	9.10944	0	0.262705	0.105082	Ⅰ 很低	321931500	0		0.99409	0.59698	0		0.11362	0.236866	0	1	Ⅲ类 低资源-高产业型
68	179	四川省	成都市	成都市	成都市	大邑县	中国·成都市·西岭雪山滑雪场	[]	待识别	待划分	城郊体验型	GaodeAPI_text(滑雪场)	103.227	30.7018	B0K6FLRVKY	成都市	低海拔人工造雪型	3	0	8.98944	0	0.266514	0.106606	Ⅰ 很低	235113000	3005.2	2140.3	3.17627	0.435986	0.901001	1	0.380084	0.679268	0	1	Ⅲ类 低资源-高产业型
69	193	四川省	雅安市	雅安市	雅安市	石棉县	雅安市王岗坪贡嘎滑雪场(暂停营业)	王岗坪乡新桥村二组35号王岗坪旅游景区	待识别	待划分	滑雪+度假综合型	GaodeAPI_text(滑雪度假区)	102.248	29.4591	B0HK7MKXQL	雅安市	低海拔人工造雪型	3	0	8.88881	0	0.269708	0.107883	Ⅰ 很低	10829800	342.08	142.9	0.448592	0.0200824	0.10256	0.0667663	0.0470091	0.0591046	0	0	Ⅳ类 低资源-低产业型
70	768	贵州省	六盘水市	六盘水市	六盘水市	盘州市	盘州滑雪场	212省道	待识别	待划分	城市综合体室内雪场型	GaodeAPI_text(冰雪世界)	104.63	26.2223	B0FFGK2XND	六盘水市	低海拔人工造雪型	3	0	8.87311	0	0.270206	0.108083	Ⅰ 很低	17105900	250.5	302.85	0.874457	0.0317206	0.0751034	0.141499	0.0990113	0.0868336	0	0	Ⅳ类 低资源-低产业型
71	24	云南省	玉溪市	玉溪市	玉溪市	江川区	冰雪世界	大街街道普照线古滇国城西南侧约70米	室内	待划分	城市综合体室内雪场型	GaodeAPI_text(冰雪世界)	102.742	24.2954	B0FFL0XH36	玉溪市	低海拔人工造雪型	3	0	8.87056	0	0.270287	0.108115	Ⅰ 很低	25820500	266.21	226.5	0.640013	0.0478807	0.0798135	0.105826	0.0703834	0.075976	0	0	Ⅳ类 低资源-低产业型
72	530	江西省	宜春市	宜春市	宜春市	靖安县	靖安国际滑雪场	中源乡353国道	待识别	待划分	城郊体验型	GaodeAPI_text(滑雪场)	114.916	28.8512	B0J0JMHSW0	宜春市	低海拔人工造雪型	3	0	8.85215	0	0.270872	0.108349	Ⅰ 很低	37110500	1017.29	494.43	0.659084	0.0688165	0.304998	0.23101	0.0727122	0.169384	0	1	Ⅲ类 低资源-高产业型
73	7	上海市	上海市	上海市	上海市	浦东新区	9isnow城市滑雪	腾飞路九号	待识别	待划分	城市综合体室内雪场型	GaodeAPI_text(滑雪场)	121.685	31.1709	B0JRPUO1SL	上海市	低海拔人工造雪型	3	0	8.828	0	0.271638	0.108655	Ⅰ 很低	539267100	0		5.7535	1	0		0.694789	0.56493	0	1	Ⅲ类 低资源-高产业型
74	523	江西省	南昌市	南昌市	南昌市	新建区	九龙溪冰雪王国	九龙溪生态休闲公园孔雀园	待识别	待划分	城市综合体室内雪场型	GaodeAPI_text(冰雪世界)	115.72	28.7987	B0J1Y5LCWR	南昌市	低海拔人工造雪型	3	0	8.75897	0	0.27383	0.109532	Ⅰ 很低	78003700	1475.24	656.82	2.06906	0.144648	0.442298	0.306882	0.244884	0.284678	0	1	Ⅲ类 低资源-高产业型
75	698	浙江省	杭州市	杭州市	杭州市	拱墅区	Hopo Snow城市滑雪空间(乐堤港A区店)	丽水路58号远洋乐堤港3层A302	待识别	待划分	城市综合体室内雪场型	GaodeAPI_text(滑雪场)	120.142	30.3044	B0H2CHTORN	杭州市	低海拔人工造雪型	3	0	8.75076	0	0.27409	0.109636	Ⅰ 很低	218603200	3335.4	1252.2	2.15564	0.405371	1	0.585058	0.255455	0.561471	0	1	Ⅲ类 低资源-高产业型
76	727	湖南省	长沙市	长沙市	长沙市	浏阳市	大围山英华锋滑雪运动场	大围山国家森林公园红莲寺景区	待识别	待划分	城郊体验型	GaodeAPI_text(滑雪场)	114.129	28.4201	B02DB10KOJ	长沙市	低海拔人工造雪型	3	0	8.70594	0	0.275513	0.110205	Ⅰ 很低	152687800	1661.32	1051.31	1.44892	0.283139	0.498087	0.491197	0.169159	0.360396	0	1	Ⅲ类 低资源-高产业型
77	4	上海市	上海市	上海市	上海市	普陀区	SKINOW雪乐山室内滑雪(长风大悦城)	大渡河路196号外场四楼L4-05-06商铺	室内	待划分	城市综合体室内雪场型	GaodeAPI_text(滑雪场)	121.395	31.2227	B0IKAZMV3H	上海市	低海拔人工造雪型	3	0	8.67007	0	0.276652	0.110661	Ⅰ 很低	539267100	0		5.7535	1	0		0.694789	0.56493	0	1	Ⅲ类 低资源-高产业型
78	386	广东省	佛山市	佛山市	佛山市	南海区	冰雪世界	南新二路与中约村北一巷交叉口西20米	室内	待划分	城市综合体室内雪场型	GaodeAPI_text(冰雪世界)	113.161	23.0248	B0LR9ORO7J	佛山市	低海拔人工造雪型	3	0	8.59042	0	0.27918	0.111672	Ⅰ 很低	133619000	325.05	961.54	4.77243	0.247779	0.0974546	0.449255	0.574991	0.34237	0	1	Ⅲ类 低资源-高产业型
79	495	江苏省	常州市	常州市	常州市	武进区	淹城冰雪世界(暂停营业)	武宜中路197号淹城春秋乐园	室内	待划分	城市综合体室内雪场型	GaodeAPI_text(冰雪城)	119.933	31.7036	B0K0OZLGDM	常州市	低海拔人工造雪型	3	0	8.57512	0	0.279665	0.111866	Ⅰ 很低	108135900	829.23	537.5	3.47053	0.200524	0.248615	0.251133	0.416017	0.279072	0	1	Ⅲ类 低资源-高产业型
80	805	重庆市	重庆市	重庆市	重庆市	丰都县	南天湖国际滑雪场(暂停营业)	仙女湖镇	待识别	待划分	城郊体验型	GaodeAPI_text(滑雪场)	107.819	29.5876	B0FFIR500E	重庆市	低海拔人工造雪型	3	0	8.42594	0	0.284401	0.11376	Ⅰ 很低	321931500	0		0.99409	0.59698	0		0.11362	0.236866	0	1	Ⅲ类 低资源-高产业型
81	708	浙江省	湖州市	湖州市	湖州市	安吉县	那鹿湾·Narok Bay·天池之巅江南滑雪场店	205省道	待识别	待划分	城郊体验型	GaodeAPI_text(滑雪场)	119.593	30.4597	B0KKSAUOYY	湖州市	低海拔人工造雪型	3	0	8.39349	0	0.285431	0.114172	Ⅰ 很低	42134200	1284.83	343.9	1.77536	0.0781323	0.38521	0.160678	0.20902	0.20826	0	1	Ⅲ类 低资源-高产业型
82	726	湖南省	长沙市	长沙市	长沙市	岳麓区	大王山旅游度假区欢乐雪域	潭州大道二段167号(大王山地铁站1号口步行430米)	待识别	待划分	滑雪+度假综合型	GaodeAPI_text(滑雪场)	112.918	28.0864	B0FFGOCP72	长沙市	低海拔人工造雪型	3	0	8.2701	0	0.289348	0.115739	Ⅰ 很低	152687800	1661.32	1051.31	1.44892	0.283139	0.498087	0.491197	0.169159	0.360396	0	1	Ⅲ类 低资源-高产业型
83	762	福建省	福州市	福州市	福州市	鼓楼区	雪乐山室内滑雪(香格里拉八匚汇店)	新权南路9号香格里拉八匚汇L316-318铺	室内	待划分	城市综合体室内雪场型	GaodeAPI_text(雪乐山)	119.306	26.0754	B0L15Z0FTV	福州市	低海拔人工造雪型	3	0	8.25487	0	0.289831	0.115932	Ⅰ 很低	142367600	921.89	846.9	2.38327	0.264002	0.276396	0.395692	0.283251	0.304835	0	1	Ⅲ类 低资源-高产业型
84	760	福建省	福州市	福州市	福州市	晋安区	雪乐山室内滑雪(东泰禾店)	竹屿路6号泰禾广场(东二环店)东区L3层	室内	待划分	城市综合体室内雪场型	GaodeAPI_text(雪乐山)	119.339	26.0898	B0JKRSVR6C	福州市	低海拔人工造雪型	3	0	8.18925	0	0.291914	0.116766	Ⅰ 很低	142367600	921.89	846.9	2.38327	0.264002	0.276396	0.395692	0.283251	0.304835	0	1	Ⅲ类 低资源-高产业型
85	705	浙江省	湖州市	湖州市	湖州市	安吉县	云上草原滑雪场(暂停营业)	山川乡山川村	待识别	待划分	城郊体验型	GaodeAPI_text(滑雪场)	119.647	30.4461	B0FFM15KX3	湖州市	低海拔人工造雪型	3	0	8.15551	0	0.292985	0.117194	Ⅰ 很低	42134200	1284.83	343.9	1.77536	0.0781323	0.38521	0.160678	0.20902	0.20826	0	1	Ⅲ类 低资源-高产业型
86	757	福建省	泉州市	泉州市	泉州市	泉港区	金钟潭景区-冰雪大世界	涂岭镇樟脚村樟脚78号	待识别	待划分	城市综合体室内雪场型	GaodeAPI_text(冰雪世界)	118.774	25.1603	B0FFL81I8L	泉州市	低海拔人工造雪型	3	0	8.14562	0	0.293299	0.11732	Ⅰ 很低	130948700	747.04	888.3	1.28909	0.242827	0.223973	0.415035	0.149642	0.257869	0	1	Ⅲ类 低资源-高产业型
87	766	贵州省	六盘水市	六盘水市	六盘水市	水城区	玉舍雪山滑雪场	玉舍国家森林公园(东南角)	待识别	待划分	城市综合体室内雪场型	GaodeAPI_text(冰雪世界)	104.816	26.4454	B035A0N87Q	六盘水市	低海拔人工造雪型	3	0	8.11133	0	0.294387	0.117755	Ⅰ 很低	17105900	250.5	302.85	0.874457	0.0317206	0.0751034	0.141499	0.0990113	0.0868336	0	0	Ⅳ类 低资源-低产业型
88	525	江西省	南昌市	南昌市	南昌市	青山湖区	长荣冰雪俱乐部(普天店)	南昌高新技术开发区昌东大道8899号普天线缆集团有限公司	待识别	待划分	体育赛事/训练型	GaodeAPI_text(滑雪训练)	116.006	28.7027	B0K0M7RZD0	南昌市	低海拔人工造雪型	3	0	8.04029	0	0.296642	0.118657	Ⅰ 很低	78003700	1475.24	656.82	2.06906	0.144648	0.442298	0.306882	0.244884	0.284678	0	1	Ⅲ类 低资源-高产业型
89	942	西藏自治区	日喀则市	日喀则市		萨嘎县	萨嘎滑雪场		户外		城郊体验型	手工补录：锡林浩特市正达滑雪场.docx	85.1159	29.4908		日喀则市	低海拔人工造雪型	3	0.245455	8.02809	0.0230326	0.297029	0.132631	Ⅰ 很低										0	0	Ⅳ类 低资源-低产业型
90	764	西藏自治区	拉萨市	拉萨市	拉萨市	墨竹工卡县	拉萨墨多滑雪场(暂停营业)	中国林拉公路日多服务区	待识别	待划分	城郊体验型	GaodeAPI_text(滑雪场)	92.2814	29.656	B0JKT5BKQP	拉萨市	低海拔人工造雪型	3	0.343182	7.98932	0.032203	0.29826	0.138626	Ⅰ 很低	9900400	301.84	0	0.245129	0.018359	0.0904959	0	0.0221643	0.0327548	0	0	Ⅳ类 低资源-低产业型
91	177	四川省	成都市	成都市	成都市	双流区	冰雪世界(建设中)	华阳南湖路南湖梦幻岛内	室内	待划分	城市综合体室内雪场型	GaodeAPI_text(冰雪世界)	104.054	30.5004	B0FFJD0SQD	成都市	低海拔人工造雪型	3	0	7.91401	0	0.300651	0.12026	Ⅰ 很低	235113000	3005.2	2140.3	3.17627	0.435986	0.901001	1	0.380084	0.679268	0	1	Ⅲ类 低资源-高产业型
92	692	浙江省	杭州市	杭州市	杭州市	上城区	LINKSNOW领雪室内滑雪(杭州大厦501城市广场店)	景昙路9号杭州大厦501城市广场F3层	室内	待划分	城市综合体室内雪场型	GaodeAPI_text(滑雪场)	120.204	30.2597	B0JABLSFJI	杭州市	低海拔人工造雪型	3	0	7.89748	0	0.301175	0.12047	Ⅰ 很低	218603200	3335.4	1252.2	2.15564	0.405371	1	0.585058	0.255455	0.561471	0	1	Ⅲ类 低资源-高产业型
93	661	河南省	洛阳市	洛阳市	洛阳市	洛龙区	伊龙滑雪场(暂停营业)	马营社区1号	待识别	待划分	城郊体验型	GaodeAPI_text(滑雪场)	112.453	34.5301	B0FFFPWERZ	洛阳市	低海拔人工造雪型	3	0	7.86019	0	0.302359	0.120944	Ⅰ 很低	58186000	795.4	707.9	0.913638	0.107898	0.238472	0.330748	0.103796	0.195229	0	1	Ⅲ类 低资源-高产业型
94	690	浙江省	宁波市	宁波市	宁波市	海曙区	宁波冰雪小镇	复悦城2层	待识别	待划分	滑雪+度假综合型	GaodeAPI_text(冰雪城)	121.536	29.8669	B0LUASO1CC	宁波市	低海拔人工造雪型	3	0	7.79585	0	0.304401	0.121761	Ⅰ 很低	181477000	1999.46	969.7	2.47056	0.336525	0.599466	0.453067	0.29391	0.420742	0	1	Ⅲ类 低资源-高产业型
95	700	浙江省	杭州市	杭州市	杭州市	萧山区	LINK SNOW领雪室内滑雪(萧山店)	博学路618萧山科创中心A座3层	室内	待划分	城市综合体室内雪场型	GaodeAPI_text(滑雪场)	120.265	30.1877	B0J6AATRQ9	杭州市	低海拔人工造雪型	3	0	7.76668	0	0.305327	0.122131	Ⅰ 很低	218603200	3335.4	1252.2	2.15564	0.405371	1	0.585058	0.255455	0.561471	0	1	Ⅲ类 低资源-高产业型
96	810	重庆市	重庆市	重庆市	重庆市	南川区	金佛山西坡滑雪场(暂停营业)	头渡镇金佛山景区	待识别	待划分	城郊体验型	GaodeAPI_text(滑雪场)	107.184	29.015	B00178YJUL	重庆市	低海拔人工造雪型	3	0	7.75903	0	0.30557	0.122228	Ⅰ 很低	321931500	0		0.99409	0.59698	0		0.11362	0.236866	0	1	Ⅲ类 低资源-高产业型
97	830	陕西省	宝鸡市	宝鸡市	宝鸡市	太白县	鳌山小野极限滑雪俱乐部	鳌山滑雪场雪具大厅顶楼东侧	待识别	待划分	城郊体验型	GaodeAPI_text(滑雪场)	107.406	34.0252	B0J31ULH8W	宝鸡市	低海拔人工造雪型	3	0.05	7.75561	0.00469183	0.305679	0.125087	Ⅰ 很低	0	484.89	0	0.780279	0	0.145377	0	0.0875113	0.058222	0	0	Ⅳ类 低资源-低产业型
98	701	浙江省	杭州市	杭州市	杭州市	萧山区	萧山冰雪世界	山阴路688号萧山众安广场5楼	室内	待划分	城市综合体室内雪场型	GaodeAPI_text(冰雪世界)	120.262	30.1782	B0LR5CBAVK	杭州市	低海拔人工造雪型	3	0	7.72939	0	0.306511	0.122604	Ⅰ 很低	218603200	3335.4	1252.2	2.15564	0.405371	1	0.585058	0.255455	0.561471	0	1	Ⅲ类 低资源-高产业型
99	695	浙江省	杭州市	杭州市	杭州市	临平区	杭州雪极星城市滑雪中心	杭辰星万里一楼(港北路兴元路交叉口)	待识别	待划分	城市综合体室内雪场型	GaodeAPI_text(滑雪场)	120.221	30.459	B0IBARK725	杭州市	低海拔人工造雪型	3	0	7.71798	0	0.306873	0.122749	Ⅰ 很低	218603200	3335.4	1252.2	2.15564	0.405371	1	0.585058	0.255455	0.561471	0	1	Ⅲ类 低资源-高产业型
100	807	重庆市	重庆市	重庆市	重庆市	南川区	奥悦湖畔滑雪场	头渡镇金山湖路99号	待识别	待划分	城郊体验型	GaodeAPI_text(滑雪场)	107.183	28.9302	B0I0RUXYIP	重庆市	低海拔人工造雪型	3	0	7.70097	0	0.307413	0.122965	Ⅰ 很低	321931500	0		0.99409	0.59698	0		0.11362	0.236866	0	1	Ⅲ类 低资源-高产业型
101	855	陕西省	渭南市	渭南市	渭南市	临渭区	渭南必捷滑雪场(暂停营业)	丰源镇龙尾坡	待识别	待划分	城郊体验型	GaodeAPI_text(滑雪场)	109.544	34.4693	B0FFFP75FF	渭南市	低海拔人工造雪型	3	0.0363636	7.6776	0.00341224	0.308155	0.125309	Ⅰ 很低	21577300	352.06	0	0.835477	0.0400123	0.105553	0	0.0942515	0.0599541	0	0	Ⅳ类 低资源-低产业型
102	724	湖南省	张家界市	张家界市	张家界市	慈利县	张家界冰雪世界	张家界冰雪世界	室内	待划分	城市综合体室内雪场型	GaodeAPI_text(雪世界)	110.712	29.2599	B0FFH2UBYQ	张家界市	低海拔人工造雪型	3	0	7.65189	0	0.308971	0.123588	Ⅰ 很低	6544100	568.95	149.7	0.387896	0.0121352	0.170579	0.0699435	0.0395976	0.0730639	0	0	Ⅳ类 低资源-低产业型
103	722	湖北省	神农架林区	神农架林区	神农架林区	神农架林区	神农架龙降坪国际生态旅游度假区	木鱼镇龙降坪	待识别	待划分	滑雪+度假综合型	GaodeAPI_text(滑雪旅游度假区)	110.39	31.5048	B0FFHGWV49	神农架林区	低海拔人工造雪型	3	0	7.58241	0	0.311176	0.124471	Ⅰ 很低				0.225239				0.0197356	0.0197356	0	0	Ⅳ类 低资源-低产业型
104	725	湖南省	长沙市	长沙市	长沙市	天心区	万达冰雪大世界	解放西路198号	待识别	待划分	城市综合体室内雪场型	GaodeAPI_text(冰雪世界)	112.975	28.1912	B0LU27TF5S	长沙市	低海拔人工造雪型	3	0	7.56449	0	0.311745	0.124698	Ⅰ 很低	152687800	1661.32	1051.31	1.44892	0.283139	0.498087	0.491197	0.169159	0.360396	0	1	Ⅲ类 低资源-高产业型
105	814	重庆市	重庆市	重庆市	重庆市	沙坪坝区	热雪奇迹体育	西林大道与永泰路交叉口西北180米	室内	待划分	城市综合体室内雪场型	GaodeAPI_text(热雪奇迹)	106.36	29.6254	B0K37PJL2U	重庆市	低海拔人工造雪型	3	0	7.47389	0	0.314621	0.125848	Ⅰ 很低	321931500	0		0.99409	0.59698	0		0.11362	0.236866	0	1	Ⅲ类 低资源-高产业型
106	182	四川省	成都市	成都市	成都市	武侯区	SKINOW雪乐山室内滑雪(凯德天府)	桂西路凯德天府商场四层(火车南站地铁站H1口旁)	室内	待划分	城市综合体室内雪场型	GaodeAPI_text(滑雪场)	104.069	30.6028	B0FFLPCCZ7	成都市	低海拔人工造雪型	3	0	7.42091	0	0.316303	0.126521	Ⅰ 很低	235113000	3005.2	2140.3	3.17627	0.435986	0.901001	1	0.380084	0.679268	0	1	Ⅲ类 低资源-高产业型
107	508	江苏省	淮安市	淮安市	淮安市	淮阴区	淮安古运河滑雪场(水世界)(暂停营业)	码头镇明远路二桥左转500米	待识别	待划分	城郊体验型	GaodeAPI_text(滑雪场)	118.955	33.5394	B0FFGG83HU	淮安市	低海拔人工造雪型	3	0	7.40417	0	0.316834	0.126734	Ⅰ 很低	54130200	266.87	453.8	1.07703	0.100377	0.0800114	0.212026	0.123747	0.12904	0	0	Ⅳ类 低资源-低产业型
108	818	重庆市	重庆市	重庆市	重庆市	綦江区	南天门冰雪世界(暂停营业)	万盛经开区万盛经济技术开发区石林镇茶园村	室内	待划分	城市综合体室内雪场型	GaodeAPI_text(冰雪世界)	106.936	28.8032	B0FFHM957M	重庆市	低海拔人工造雪型	3	0	7.37944	0	0.317619	0.127048	Ⅰ 很低	321931500	0		0.99409	0.59698	0		0.11362	0.236866	0	1	Ⅲ类 低资源-高产业型
109	696	浙江省	杭州市	杭州市	杭州市	余杭区	JRay snow室内滑雪(极瑞雪)	五常街道未尚名府21-4650	室内	待划分	城市综合体室内雪场型	GaodeAPI_text(滑雪场)	120.043	30.2945	B0I3TRHGEY	杭州市	低海拔人工造雪型	3	0	7.32935	0	0.319209	0.127684	Ⅰ 很低	218603200	3335.4	1252.2	2.15564	0.405371	1	0.585058	0.255455	0.561471	0	1	Ⅲ类 低资源-高产业型
110	752	福建省	南平市	南平市	南平市	武夷山市	武夷山冰雪世界	大王峰北路三姑度假区极地海洋公园一层	室内	待划分	城市综合体室内雪场型	GaodeAPI_text(冰雪世界)	117.987	27.6625	B0FFH0ECXN	南平市	低海拔人工造雪型	3	0	7.3055	0	0.319966	0.127987	Ⅰ 很低	20903000	676.2	263	0.431346	0.0387619	0.202734	0.12288	0.0449032	0.10232	0	0	Ⅳ类 低资源-低产业型
111	187	四川省	成都市	成都市	成都市	都江堰市	成都热雪奇迹	玉堂镇至臻路31号	室内	待划分	城市综合体室内雪场型	GaodeAPI_text(滑雪场)	103.619	30.952	B0GDLZHH7V	成都市	低海拔人工造雪型	3	0	7.29024	0	0.320451	0.12818	Ⅰ 很低	235113000	3005.2	2140.3	3.17627	0.435986	0.901001	1	0.380084	0.679268	0	1	Ⅲ类 低资源-高产业型
112	507	江苏省	无锡市	无锡市	无锡市	滨湖区	无锡热雪奇迹	融创文化旅游城66号融创茂内2楼	室内	待划分	城市综合体室内雪场型	GaodeAPI_text(热雪奇迹)	120.269	31.4469	B0FFKQ76UH	无锡市	低海拔人工造雪型	3	0	7.27911	0	0.320804	0.128322	Ⅰ 很低	162632900	1057.89	749.5	3.91387	0.301581	0.31717	0.350185	0.470153	0.359772	0	1	Ⅲ类 低资源-高产业型
113	531	江西省	萍乡市	萍乡市	萍乡市	湘东区	冰雪世界	泉湖南路2号	室内	待划分	城市综合体室内雪场型	GaodeAPI_text(冰雪世界)	113.763	27.6422	B0KG1ZYPMH	萍乡市	低海拔人工造雪型	3	0	7.24839	0	0.321779	0.128712	Ⅰ 很低	12114400	229.97	180.16	0.899834	0.0224646	0.0689483	0.0841751	0.10211	0.0694245	0	0	Ⅳ类 低资源-低产业型
114	8	上海市	上海市	上海市	上海市	浦东新区	WOWski浦东滑雪训练中心	金科路1800号	待识别	待划分	体育赛事/训练型	GaodeAPI_text(滑雪训练)	121.591	31.2246	B0K3M7U1N5	上海市	低海拔人工造雪型	3	0	7.15719	0	0.324674	0.12987	Ⅰ 很低	539267100	0		5.7535	1	0		0.694789	0.56493	0	1	Ⅲ类 低资源-高产业型
115	185	四川省	成都市	成都市	成都市	武侯区	武外滑雪馆	成双大道中段886号	待识别	待划分	城市综合体室内雪场型	GaodeAPI_text(滑雪场)	103.981	30.6016	B0I3TCBQX7	成都市	低海拔人工造雪型	3	0	7.13553	0	0.325362	0.130145	Ⅰ 很低	235113000	3005.2	2140.3	3.17627	0.435986	0.901001	1	0.380084	0.679268	0	1	Ⅲ类 低资源-高产业型
116	228	安徽省	合肥市	合肥市	合肥市	长丰县	雪乐山滑雪(世纪金源购物中心A座店)	世纪金源购物中心A座	室内	待划分	城市综合体室内雪场型	GaodeAPI_text(滑雪中心)	117.246	32.0042	B0JDPGVXPE	合肥市	低海拔人工造雪型	3	0	7.11418	0	0.326039	0.130416	Ⅰ 很低	135077000	976.78	985.3	1.80622	0.250483	0.292852	0.460356	0.212789	0.30412	0	1	Ⅲ类 低资源-高产业型
117	657	河南省	洛阳市	洛阳市	洛阳市	嵩县	白云小镇冰雪乐园滑雪场(暂停营业)	白云小镇	室内	待划分	城市综合体室内雪场型	GaodeAPI_text(滑雪场)	111.948	33.7584	B0FFHHPHIH	洛阳市	低海拔人工造雪型	3	0	7.09054	0	0.32679	0.130716	Ⅰ 很低	58186000	795.4	707.9	0.913638	0.107898	0.238472	0.330748	0.103796	0.195229	0	1	Ⅲ类 低资源-高产业型
118	827	陕西省	安康市	安康市	安康市	岚皋县	巴山秋池冰雪大世界(暂停营业)	月城公路	待识别	待划分	城市综合体室内雪场型	GaodeAPI_text(冰雪城)	108.845	32.0533	B0K0SC742L	安康市	低海拔人工造雪型	3	0	7.02402	0	0.328901	0.13156	Ⅰ 很低	0	75.38	0	0.450143	0	0.0226	0	0.0471985	0.0174496	0	0	Ⅳ类 低资源-低产业型
119	3	上海市	上海市	上海市	上海市	徐汇区	Hypersnow城市滑雪营地(龙华会店)	龙华路2778号上海龙华会C5L1层	待识别	待划分	城市综合体室内雪场型	GaodeAPI_text(滑雪小镇)	121.453	31.172	B0K2OL9OFH	上海市	低海拔人工造雪型	3	0	6.96401	0	0.330806	0.132322	Ⅰ 很低	539267100	0		5.7535	1	0		0.694789	0.56493	0	1	Ⅲ类 低资源-高产业型
120	804	重庆市	重庆市	重庆市	重庆市	两江新区	际华园滑雪馆	际华园南路188号	待识别	待划分	城市综合体室内雪场型	GaodeAPI_text(滑雪中心)	106.832	29.6859	B0H04A8HDM	重庆市	低海拔人工造雪型	3	0	6.89728	0	0.332924	0.13317	Ⅰ 很低	321931500	0		0.99409	0.59698	0		0.11362	0.236866	0	1	Ⅲ类 低资源-高产业型
121	819	重庆市	重庆市	重庆市	重庆市	綦江区	恐龙冰雪世界(暂停开放)	石林镇万盛经开区石海路100号万盛奥陶纪旅游度假区	室内	待划分	城市综合体室内雪场型	GaodeAPI_text(冰雪世界)	106.942	28.8325	B0FFL4Q617	重庆市	低海拔人工造雪型	3	0	6.84798	0	0.334489	0.133796	Ⅰ 很低	321931500	0		0.99409	0.59698	0		0.11362	0.236866	0	1	Ⅲ类 低资源-高产业型
122	188	四川省	成都市	成都市	成都市	都江堰市	热雪奇迹体育(成都滑雪训练中心)	青城山大道与乐园路交叉口东200米	室内	待划分	城市综合体室内雪场型	GaodeAPI_text(热雪奇迹)	103.619	30.9523	B0JRUKRDVV	成都市	低海拔人工造雪型	3	0	6.80846	0	0.335744	0.134297	Ⅰ 很低	235113000	3005.2	2140.3	3.17627	0.435986	0.901001	1	0.380084	0.679268	0	1	Ⅲ类 低资源-高产业型
123	255	山东省	枣庄市	枣庄市	枣庄市	薛城区	新城游乐场水上乐园冰雪世界(暂停营业)	天衢商贸城A座13楼东数第二间	室内	待划分	城市综合体室内雪场型	GaodeAPI_text(冰雪世界)	117.32	34.7847	B0I6ZZ5GNW	枣庄市	低海拔人工造雪型	3	0	6.73378	0	0.338114	0.135246	Ⅰ 很低	23864100	132.5	380.98	1.77219	0.0442528	0.0397254	0.178003	0.208633	0.117654	0	0	Ⅳ类 低资源-低产业型
124	10	上海市	上海市	上海市	上海市	长宁区	SOLOX城市滑雪(虹桥南丰城店)	遵义路102号	待识别	待划分	城市综合体室内雪场型	GaodeAPI_text(滑雪小镇)	121.408	31.2075	B0K3DHUHVA	上海市	低海拔人工造雪型	3	0	6.72255	0	0.33847	0.135388	Ⅰ 很低	539267100	0		5.7535	1	0		0.694789	0.56493	0	1	Ⅲ类 低资源-高产业型
125	720	湖北省	武汉市	武汉市	武汉市	黄陂区	武汉城建热雪奇迹	G318黄陂大道与纵四路交汇处	室内	待划分	城市综合体室内雪场型	GaodeAPI_text(滑雪训练)	114.402	30.8864	B0K0KCCWB5	武汉市	低海拔人工造雪型	3	0	6.71825	0	0.338607	0.135443	Ⅰ 很低	211062300	2906.29	1377.4	2.85035	0.391387	0.871347	0.643555	0.340286	0.561644	0	1	Ⅲ类 低资源-高产业型
126	717	湖北省	武汉市	武汉市	武汉市	汉阳区	武汉冰雪中心	四新南路610号	室内	待划分	城市综合体室内雪场型	GaodeAPI_text(滑雪场)	114.21	30.5185	B0KDUNXXP7	武汉市	低海拔人工造雪型	3	0	6.66578	0	0.340273	0.136109	Ⅰ 很低	211062300	2906.29	1377.4	2.85035	0.391387	0.871347	0.643555	0.340286	0.561644	0	1	Ⅲ类 低资源-高产业型
127	638	河南省	南阳市	南阳市	南阳市	南召县	南召大宝天曼滑雪场	乔端镇玉藏村六组	待识别	待划分	城郊体验型	GaodeAPI_text(滑雪场)	111.96	33.5205	B0L61AMQF1	南阳市	低海拔人工造雪型	3	0	6.66104	0	0.340423	0.136169	Ⅰ 很低	48790800	227.12	949.7	0.759692	0.0904761	0.0680938	0.443723	0.0849974	0.171823	0	1	Ⅲ类 低资源-高产业型
128	773	贵州省	遵义市	遵义市	遵义市	桐梓县	大娄山滑雪场(暂停营业)	[]	待识别	待划分	城市综合体室内雪场型	GaodeAPI_text(冰雪世界)	106.99	28.468	B0FFHK5Q02	遵义市	低海拔人工造雪型	3	0	6.64178	0	0.341034	0.136414	Ⅰ 很低	50272000	911.9	658.06	0.574397	0.0932228	0.2734	0.307462	0.0623711	0.184114	0	1	Ⅲ类 低资源-高产业型
129	648	河南省	平顶山市	平顶山市	平顶山市	鲁山县	金汤山温泉滑雪旅游度假景区	瓦屋镇官樊沟(金汤山滑雪场)	待识别	待划分	滑雪+度假综合型	GaodeAPI_text(滑雪度假区)	112.644	33.8928	B0I6YUPEQ6	平顶山市	低海拔人工造雪型	3	0	6.61242	0	0.341966	0.136787	Ⅰ 很低	28319700	0	492	0.913446	0.0525152	0	0.229874	0.103772	0.0965404	0	0	Ⅳ类 低资源-低产业型
130	1	上海市	上海市	上海市	上海市	宝山区	G·SNOW城市滑雪(日月光店)	日月光中心(宝山店)(大场镇地铁站出入口步行240米)	待识别	待划分	城市综合体室内雪场型	GaodeAPI_text(滑雪小镇)	121.417	31.2946	B0L6NAHOU6	上海市	低海拔人工造雪型	3	0	6.55416	0	0.343816	0.137526	Ⅰ 很低	539267100	0		5.7535	1	0		0.694789	0.56493	0	1	Ⅲ类 低资源-高产业型
131	813	重庆市	重庆市	重庆市	重庆市	武隆区	仙女山国际滑雪场(暂停营业)	仙女山国家森林公园内(西南角)	待识别	待划分	城郊体验型	GaodeAPI_text(滑雪场)	107.724	29.4709	B00179APGS	重庆市	低海拔人工造雪型	3	0	6.54725	0	0.344035	0.137614	Ⅰ 很低	321931500	0		0.99409	0.59698	0		0.11362	0.236866	0	1	Ⅲ类 低资源-高产业型
132	809	重庆市	重庆市	重庆市	重庆市	南川区	金佛山北坡滑雪场	金佛山景区	待识别	待划分	城郊体验型	GaodeAPI_text(滑雪场)	107.191	29.0228	B00178YIZ8	重庆市	低海拔人工造雪型	3	0	6.52788	0	0.34465	0.13786	Ⅰ 很低	321931500	0		0.99409	0.59698	0		0.11362	0.236866	0	1	Ⅲ类 低资源-高产业型
133	288	山东省	济宁市	济宁市	济宁市	金乡县	金乡水云台壹号院滑雪场(暂停营业)	水云台壹号院售楼处南侧	待识别	待划分	城郊体验型	GaodeAPI_text(滑雪场)	116.342	35.0539	B0GR61147X	济宁市	低海拔人工造雪型	3	0.00454545	6.51866	0.00042653	0.344943	0.138233	Ⅰ 很低	58675000	453.1	824.05	1.31227	0.108805	0.135846	0.385016	0.152472	0.195535	0	1	Ⅲ类 低资源-高产业型
134	211	天津市	天津市	天津市	天津市	西青区	天津燕翔滑雪城市空间(梅江店)	梅江会展中心二期三层(山姆会员商店楼上三层)	待识别	待划分	城郊体验型	GaodeAPI_text(滑雪场)	117.213	39.037	B0JKH5VH5E	天津市	低海拔人工造雪型	3	0	6.45293	0	0.347029	0.138812	Ⅰ 很低	180243200	0		2.77744	0.334237	0		0.331384	0.221874	0	1	Ⅲ类 低资源-高产业型
135	237	山东省	临沂市	临沂市	临沂市	河东区	立晨农庄滑雪场	立晨农庄内	待识别	待划分	滑雪+度假综合型	GaodeAPI_text(滑雪场)	118.447	35.1815	B0I6Y5VLB3	临沂市	低海拔人工造雪型	3	0.0340909	6.42816	0.00319898	0.347815	0.141045	Ⅰ 很低	65558000	475.6	1094.38	1.87332	0.121569	0.142592	0.511321	0.220982	0.249116	0	1	Ⅲ类 低资源-高产业型
136	189	四川省	资阳市	资阳市	资阳市	雁江区	ONESNOW临空四季滑雪场	雁栖湖中路2楼	待识别	待划分	城郊体验型	GaodeAPI_text(滑雪场)	104.559	30.1831	B0KUH5JD9O	资阳市	低海拔人工造雪型	3	0	6.39319	0	0.348925	0.13957	Ⅰ 很低	10900000	145.59	225.3	0.815611	0.0202126	0.0436499	0.105266	0.0918256	0.0652385	0	0	Ⅳ类 低资源-低产业型
137	20	云南省	昭通市	昭通市	昭通市	鲁甸县	鲁甸轿顶山冰雪世界	轿顶山景区游客服务中心西北侧240米	室内	待划分	城市综合体室内雪场型	GaodeAPI_text(华发冰雪世界)	103.352	27.173	B0KBCUI4A9	昭通市	低海拔人工造雪型	3	0	6.36313	0	0.349879	0.139952	Ⅰ 很低	20169100	205.48	485.4	0.606968	0.0374009	0.0616058	0.226791	0.0663483	0.0980364	0	0	Ⅳ类 低资源-低产业型
138	178	四川省	成都市	成都市	成都市	双流区	滑噜噜四季滑雪场(暂停营业)	华阳街道麓湖中路西段998号	待识别	待划分	城郊体验型	GaodeAPI_text(滑雪场)	104.064	30.4578	B0FFK756AI	成都市	低海拔人工造雪型	3	0	6.32315	0	0.351148	0.140459	Ⅰ 很低	235113000	3005.2	2140.3	3.17627	0.435986	0.901001	1	0.380084	0.679268	0	1	Ⅲ类 低资源-高产业型
139	812	重庆市	重庆市	重庆市	重庆市	武隆区	仙女山冰雪城(暂停营业)	仙女山国家森林公园内(西南角)	室内	待划分	城市综合体室内雪场型	GaodeAPI_text(冰雪城)	107.732	29.4766	B0FFJD4E6V	重庆市	低海拔人工造雪型	3	0	6.29156	0	0.352151	0.14086	Ⅰ 很低	321931500	0		0.99409	0.59698	0		0.11362	0.236866	0	1	Ⅲ类 低资源-高产业型
140	13	上海市	上海市	上海市	上海市	闵行区	S.H.O.W滑雪场(紫竹店)	东川路333弄31号2楼	待识别	待划分	城郊体验型	GaodeAPI_text(滑雪场)	121.468	31.0269	B0JA7HZNLM	上海市	低海拔人工造雪型	3	0	6.28022	0	0.352511	0.141004	Ⅰ 很低	539267100	0		5.7535	1	0		0.694789	0.56493	0	1	Ⅲ类 低资源-高产业型
141	806	重庆市	重庆市	重庆市	重庆市	云阳县	云阳龙缸滑雪场(暂停营业)	清水土家族乡岐山村一组	待识别	待划分	城郊体验型	GaodeAPI_text(滑雪场)	108.913	30.5841	B0FFIQXZ7F	重庆市	低海拔人工造雪型	3	0	6.24259	0	0.353706	0.141482	Ⅰ 很低	321931500	0		0.99409	0.59698	0		0.11362	0.236866	0	1	Ⅲ类 低资源-高产业型
142	529	江西省	宜春市	宜春市	宜春市	靖安县	三爪仑四季滑雪场	三爪仑红星村龙山组	待识别	待划分	城郊体验型	GaodeAPI_text(滑雪场)	115.272	29.0438	B0J0350338	宜春市	低海拔人工造雪型	3	0	6.21619	0	0.354544	0.141817	Ⅰ 很低	37110500	1017.29	494.43	0.659084	0.0688165	0.304998	0.23101	0.0727122	0.169384	0	1	Ⅲ类 低资源-高产业型
143	811	重庆市	重庆市	重庆市	重庆市	武隆区	仙女山冰雪世界(暂停营业)	乌江北岸仙女山	室内	待划分	城市综合体室内雪场型	GaodeAPI_text(冰雪世界)	107.747	29.5017	B0FFJP7CMC	重庆市	低海拔人工造雪型	3	0	6.21397	0	0.354614	0.141846	Ⅰ 很低	321931500	0		0.99409	0.59698	0		0.11362	0.236866	0	1	Ⅲ类 低资源-高产业型
144	709	浙江省	衢州市	衢州市	衢州市	柯城区	耀雪冰雪世界	鹿鸣银泰	室内	待划分	城市综合体室内雪场型	GaodeAPI_text(耀雪冰雪世界)	118.858	28.959	B0L1KHUJZ6	衢州市	低海拔人工造雪型	3	0	6.2074	0	0.354823	0.141929	Ⅰ 很低	22628300	403.56	229.7	2.43811	0.0419612	0.120993	0.107321	0.289949	0.140056	0	1	Ⅲ类 低资源-高产业型
145	378	山西省	运城市	运城市	运城市	绛县	东华山滑雪场	卫庄镇	待识别	待划分	城郊体验型	GaodeAPI_text(滑雪场)	111.658	35.4823	B0FFFQVGXE	运城市	低海拔人工造雪型	3	0	6.18198	0	0.35563	0.142252	Ⅰ 很低	21906000	231.8	470.56	0.992662	0.0406218	0.0694969	0.219857	0.113445	0.110855	0	0	Ⅳ类 低资源-低产业型
146	704	浙江省	温州市	温州市	温州市	文成县	绿水尖室外滑雪场(暂停营业)	铜铃山镇上垟村	待识别	待划分	城市综合体室内雪场型	GaodeAPI_text(冰雪世界)	119.867	27.8467	B0FFHNL5BO	温州市	低海拔人工造雪型	3	0	6.09269	0	0.358464	0.143385	Ⅰ 很低	97188500	1294.1	976.1	2.0831	0.180223	0.387989	0.456058	0.246598	0.317717	0	1	Ⅲ类 低资源-高产业型
147	815	重庆市	重庆市	重庆市	重庆市	沙坪坝区	重庆热雪奇迹	西林大道84号融创茂1层	室内	待划分	城市综合体室内雪场型	GaodeAPI_text(滑雪训练)	106.36	29.6261	B0FFMBT7ER	重庆市	低海拔人工造雪型	3	0	6.07157	0	0.359134	0.143654	Ⅰ 很低	321931500	0		0.99409	0.59698	0		0.11362	0.236866	0	1	Ⅲ类 低资源-高产业型
148	501	江苏省	徐州市	徐州市	徐州市	铜山区	汉王冰雪大世界(暂停开放)	汉王镇纪信路圣得户外基地	待识别	待划分	城市综合体室内雪场型	GaodeAPI_text(冰雪乐园)	117.076	34.2059	B0G3M71GHQ	徐州市	低海拔人工造雪型	3	0.0295455	6.04509	0.00277245	0.359975	0.145653	Ⅰ 很低	95371200	323.59	902	1.31565	0.176853	0.0970168	0.421436	0.152885	0.212048	0	1	Ⅲ类 低资源-高产业型
149	693	浙江省	杭州市	杭州市	杭州市	上城区	城市滑雪空间(杭州来福士中心店)	新业路228号杭州来福士广场4F层	待识别	待划分	城市综合体室内雪场型	GaodeAPI_text(滑雪场)	120.213	30.248	B0HADOHLO9	杭州市	低海拔人工造雪型	3	0	6.00113	0	0.36137	0.144548	Ⅰ 很低	218603200	3335.4	1252.2	2.15564	0.405371	1	0.585058	0.255455	0.561471	0	1	Ⅲ类 低资源-高产业型
150	524	江西省	南昌市	南昌市	南昌市	红谷滩区	融创冰雪世界	南龙蟠街888号南昌融创乐园	室内	待划分	城市综合体室内雪场型	GaodeAPI_text(雪世界)	115.785	28.5768	B0I13CWDR9	南昌市	低海拔人工造雪型	3	0	5.99731	0	0.361491	0.144597	Ⅰ 很低	78003700	1475.24	656.82	2.06906	0.144648	0.442298	0.306882	0.244884	0.284678	0	1	Ⅲ类 低资源-高产业型
151	723	湖北省	黄冈市	黄冈市	黄冈市	罗田县	红花尖滑雪度假村(暂停营业)	红花尖滑雪场售票厅西南侧80米	待识别	待划分	滑雪+度假综合型	GaodeAPI_text(滑雪旅游度假区)	115.71	31.0596	B0FFIOVG1A	黄冈市	低海拔人工造雪型	3	0	5.99597	0	0.361534	0.144614	Ⅰ 很低	32166500	241.62	579.22	0.996965	0.0596485	0.0724411	0.270626	0.113971	0.129171	0	0	Ⅳ类 低资源-低产业型
152	718	湖北省	武汉市	武汉市	武汉市	江汉区	武汉冰雪小镇	江汉路M商场4层	待识别	待划分	滑雪+度假综合型	GaodeAPI_text(冰雪乐园)	114.286	30.5835	B0LUCUX2QH	武汉市	低海拔人工造雪型	3	0	5.99311	0	0.361625	0.14465	Ⅰ 很低	211062300	2906.29	1377.4	2.85035	0.391387	0.871347	0.643555	0.340286	0.561644	0	1	Ⅲ类 低资源-高产业型
153	829	陕西省	宝鸡市	宝鸡市	宝鸡市	太白县	太白鳌山滑雪场	咀头镇塘口村2组	待识别	待划分	城郊体验型	GaodeAPI_text(滑雪场)	107.404	34.0166	B0FFHO9MOQ	宝鸡市	低海拔人工造雪型	3	0.05	5.9841	0.00469183	0.361911	0.147579	Ⅰ 很低	0	484.89	0	0.780279	0	0.145377	0	0.0875113	0.058222	0	0	Ⅳ类 低资源-低产业型
154	674	河南省	许昌市	许昌市	许昌市	禹州市	大鸿寨滑雪场(暂停营业)	鸠山镇后地村	待识别	待划分	城郊体验型	GaodeAPI_text(滑雪场)	113.093	34.2546	B0FFFPL9EH	许昌市	低海拔人工造雪型	3	0.0931818	5.96392	0.00874387	0.362551	0.150267	Ⅰ 很低	34411000	87.56	438.3	1.40528	0.0638107	0.0262517	0.204784	0.16383	0.114669	0	0	Ⅳ类 低资源-低产业型
155	862	陕西省	西安市	西安市	西安市	蓝田县	白鹿原影视城四季滑雪场	夜谭·白鹿原西侧250米	待识别	待划分	滑雪+度假综合型	GaodeAPI_text(滑雪场)	109.273	34.0752	B0FFK0RZ27	西安市	低海拔人工造雪型	3	0.00227273	5.95485	0.000213265	0.362839	0.145264	Ⅰ 很低	133177800	1882.42	1307.82	2.01536	0.246961	0.564376	0.611045	0.238326	0.415177	0	1	Ⅲ类 低资源-高产业型
156	694	浙江省	杭州市	杭州市	杭州市	临安区	大明山万松岭滑雪场(暂停营业)	清凉峰镇白果村横溪桥158号	待识别	待划分	城郊体验型	GaodeAPI_text(滑雪场)	118.995	30.0236	B0FFIP5AKW	杭州市	低海拔人工造雪型	3	0	5.92963	0	0.36364	0.145456	Ⅰ 很低	218603200	3335.4	1252.2	2.15564	0.405371	1	0.585058	0.255455	0.561471	0	1	Ⅲ类 低资源-高产业型
157	706	浙江省	湖州市	湖州市	湖州市	安吉县	安吉江南天池滑雪场(暂停营业)	江南天池度假村景区内	待识别	待划分	城郊体验型	GaodeAPI_text(滑雪场)	119.597	30.4706	B023C02Y24	湖州市	低海拔人工造雪型	3	0	5.9161	0	0.364069	0.145628	Ⅰ 很低	42134200	1284.83	343.9	1.77536	0.0781323	0.38521	0.160678	0.20902	0.20826	0	1	Ⅲ类 低资源-高产业型
158	689	浙江省	宁波市	宁波市	宁波市	奉化区	商量岗滑雪场(暂停营业)	溪口镇商量岗森林旅游度假区内	待识别	待划分	城市综合体室内雪场型	GaodeAPI_text(冰雪世界)	121.203	29.7201	B023E13W11	宁波市	低海拔人工造雪型	3	0	5.89727	0	0.364667	0.145867	Ⅰ 很低	181477000	1999.46	969.7	2.47056	0.336525	0.599466	0.453067	0.29391	0.420742	0	1	Ⅲ类 低资源-高产业型
159	684	河南省	郑州市	郑州市	郑州市	荥阳市	郑州豫龙滑雪场(暂停营业)	广武镇张庄村黄河彩虹谷景区内	待识别	待划分	城郊体验型	GaodeAPI_text(滑雪场)	113.444	34.9364	B0HK3AJSQK	郑州市	低海拔人工造雪型	3	0	5.8605	0	0.365834	0.146334	Ⅰ 很低	145321000	1401.1	1300.8	2.99446	0.269479	0.42007	0.607765	0.357884	0.413799	0	1	Ⅲ类 低资源-高产业型
160	721	湖北省	武汉市	武汉市	武汉市	黄陂区	武汉甘露山国际滑雪场	G318黄陂大道与纵四路交汇处武汉甘露山文创城	待识别	待划分	城郊体验型	GaodeAPI_text(滑雪场)	114.404	30.8834	B0H0M5HJMK	武汉市	低海拔人工造雪型	3	0	5.84737	0	0.366251	0.1465	Ⅰ 很低	211062300	2906.29	1377.4	2.85035	0.391387	0.871347	0.643555	0.340286	0.561644	0	1	Ⅲ类 低资源-高产业型
161	702	浙江省	杭州市	杭州市	杭州市	西湖区	Hopo Snow城市滑雪空间(西湖文体中心店)	蒋村街道晴川街217号A座一层滑雪馆	待识别	待划分	城市综合体室内雪场型	GaodeAPI_text(滑雪中心)	120.071	30.2828	B0LRMCYCUA	杭州市	低海拔人工造雪型	3	0	5.83207	0	0.366737	0.146695	Ⅰ 很低	218603200	3335.4	1252.2	2.15564	0.405371	1	0.585058	0.255455	0.561471	0	1	Ⅲ类 低资源-高产业型
162	697	浙江省	杭州市	杭州市	杭州市	余杭区	浙里趣滑呗·室内滑雪	西溪印象城B座3楼	室内	待划分	城市综合体室内雪场型	GaodeAPI_text(滑雪训练)	120.047	30.2467	B0K3FHJSNR	杭州市	低海拔人工造雪型	3	0	5.76101	0	0.368992	0.147597	Ⅰ 很低	218603200	3335.4	1252.2	2.15564	0.405371	1	0.585058	0.255455	0.561471	0	1	Ⅲ类 低资源-高产业型
163	498	江苏省	徐州市	徐州市	徐州市	贾汪区	茱萸山滑雪场(暂停营业)	山水大道与茱萸路交叉路口茱萸谷冰雪大世界	待识别	待划分	城郊体验型	GaodeAPI_text(滑雪场)	117.527	34.4323	B0FFLM2I6S	徐州市	低海拔人工造雪型	3	0.0295455	5.75948	0.00277245	0.36904	0.14928	Ⅰ 很低	95371200	323.59	902	1.31565	0.176853	0.0970168	0.421436	0.152885	0.212048	0	1	Ⅲ类 低资源-高产业型
164	186	四川省	成都市	成都市	成都市	武侯区	美洲四季滑雪场	高新区锦城大道1999号	待识别	待划分	城郊体验型	GaodeAPI_text(滑雪场)	104.032	30.578	B0FFF0B9U2	成都市	低海拔人工造雪型	3	0	5.74447	0	0.369517	0.147807	Ⅰ 很低	235113000	3005.2	2140.3	3.17627	0.435986	0.901001	1	0.380084	0.679268	0	1	Ⅲ类 低资源-高产业型
165	833	陕西省	宝鸡市	宝鸡市	宝鸡市	金台区	西府冰雪大世界	北坡胜利塬西府欢乐世界内东南角	待识别	待划分	城市综合体室内雪场型	GaodeAPI_text(冰雪乐园)	107.138	34.3906	B0IKPHZA68	宝鸡市	低海拔人工造雪型	3	0.05	5.74303	0.00469183	0.369563	0.15064	Ⅰ 很低	0	484.89	0	0.780279	0	0.145377	0	0.0875113	0.058222	0	0	Ⅳ类 低资源-低产业型
166	502	江苏省	扬州市	扬州市	扬州市	仪征市	冰雪世界	枣林湾生态园景区扬州世博园内(原方块花园)	室内	待划分	城市综合体室内雪场型	GaodeAPI_text(雪世界)	119.102	32.3279	B0LBFUZ8MP	扬州市	低海拔人工造雪型	3	0	5.72931	0	0.369998	0.147999	Ⅰ 很低	78096400	610.33	458.5	2.0811	0.14482	0.182986	0.214222	0.246355	0.197095	0	1	Ⅲ类 低资源-高产业型
167	658	河南省	洛阳市	洛阳市	洛阳市	栾川县	洛阳伏牛山四季旅游度假区	石庙镇杨树坪村内	待识别	待划分	滑雪+度假综合型	GaodeAPI_text(滑雪场)	111.483	33.7403	B017B00SCE	洛阳市	低海拔人工造雪型	3	0	5.66166	0	0.372146	0.148858	Ⅰ 很低	58186000	795.4	707.9	0.913638	0.107898	0.238472	0.330748	0.103796	0.195229	0	1	Ⅲ类 低资源-高产业型
168	515	江苏省	苏州市	苏州市	苏州市	相城区	MEETSNOW雪遇城市滑雪俱乐部(苏城外店)	玉成路与金砖路交叉口西120米	待识别	待划分	城市综合体室内雪场型	GaodeAPI_text(滑雪场)	120.604	31.3846	B0I30XOL68	苏州市	低海拔人工造雪型	3	0	5.57862	0	0.374782	0.149913	Ⅰ 很低	267269800	1147.52	1295.8	3.67673	0.495617	0.344043	0.605429	0.441196	0.471571	0	1	Ⅲ类 低资源-高产业型
169	180	四川省	成都市	成都市	成都市	大邑县	西岭雪山滑雪场(暂停营业)	西岭镇	待识别	待划分	城郊体验型	GaodeAPI_text(滑雪场)	103.209	30.6988	B001C7U51S	成都市	低海拔人工造雪型	3	0	5.55573	0	0.375508	0.150203	Ⅰ 很低	235113000	3005.2	2140.3	3.17627	0.435986	0.901001	1	0.380084	0.679268	0	1	Ⅲ类 低资源-高产业型
170	621	河北省	邢台市	邢台市	邢台市	沙河市	红薯岭滑雪场	沙河红薯岭油菜花海西南侧460米	待识别	待划分	城郊体验型	GaodeAPI_text(滑雪场)	114.376	36.9274	B0FFM3ZE8X	邢台市	低海拔人工造雪型	3	0.00909091	5.49541	0.00085306	0.377423	0.151481	Ⅰ 很低	27659000	191.23	695.55	2.06729	0.05129	0.0573335	0.324978	0.244667	0.169567	0	1	Ⅲ类 低资源-高产业型
171	527	江西省	宜春市	宜春市	宜春市	袁州区	明月山滑雪场(暂停营业)	宜春市明月山国家级风景名胜区内	待识别	待划分	城郊体验型	GaodeAPI_text(滑雪场)	114.293	27.5886	B0I6TDM26O	宜春市	低海拔人工造雪型	3	0	5.48323	0	0.37781	0.151124	Ⅰ 很低	37110500	1017.29	494.43	0.659084	0.0688165	0.304998	0.23101	0.0727122	0.169384	0	1	Ⅲ类 低资源-高产业型
172	940	西藏自治区	日喀则市	日喀则市		定日县	日喀则市珠峰滑雪场		户外		城郊体验型	手工补录：锡林浩特市正达滑雪场.docx	86.843	28.1658		日喀则市	低海拔人工造雪型	3	0.245455	5.41807	0.0230326	0.379878	0.165771	Ⅱ 较低										0	0	Ⅳ类 低资源-低产业型
173	229	安徽省	马鞍山市	马鞍山市	马鞍山市	和县	冰雪大世界(暂停营业)	陋室西街150号	待识别	待划分	城市综合体室内雪场型	GaodeAPI_text(雪世界)	118.363	31.7194	B0LAV163DA	马鞍山市	低海拔人工造雪型	3	0	5.31551	0	0.383133	0.153253	Ⅰ 很低	27846500	204.25	219.1	1.51296	0.0516377	0.061237	0.102369	0.176979	0.0980556	0	0	Ⅳ类 低资源-低产业型
174	510	江苏省	淮安市	淮安市	淮安市	金湖县	金湖荷花荡滑雪场(暂停开放)	塔集镇荷花荡景区内	待识别	待划分	滑雪+度假综合型	GaodeAPI_text(滑雪场)	119.26	32.8696	B0IKT5DX0A	淮安市	低海拔人工造雪型	3	0	5.30069	0	0.383604	0.153441	Ⅰ 很低	54130200	266.87	453.8	1.07703	0.100377	0.0800114	0.212026	0.123747	0.12904	0	0	Ⅳ类 低资源-低产业型
175	532	江西省	萍乡市	萍乡市	萍乡市	芦溪县	武功山七星雪冰雪大世界	新泉乡芦万武旅游公路774乡	待识别	待划分	城市综合体室内雪场型	GaodeAPI_text(冰雪大世界)	114.137	27.4955	B0KDO7VLQO	萍乡市	低海拔人工造雪型	3	0	5.29417	0	0.383811	0.153524	Ⅰ 很低	12114400	229.97	180.16	0.899834	0.0224646	0.0689483	0.0841751	0.10211	0.0694245	0	0	Ⅳ类 低资源-低产业型
176	2	上海市	上海市	上海市	上海市	宝山区	S.H.O.W滑雪场	真陈路719号国金仓储	待识别	待划分	城郊体验型	GaodeAPI_text(滑雪场)	121.348	31.2996	B0I0350C59	上海市	低海拔人工造雪型	3	0	5.27982	0	0.384266	0.153707	Ⅰ 很低	539267100	0		5.7535	1	0		0.694789	0.56493	0	1	Ⅲ类 低资源-高产业型
177	504	江苏省	无锡市	无锡市	无锡市	宜兴市	宜兴竹海滑雪场(暂停营业)	湖父镇竹海村岗下村99号到101号	待识别	待划分	城郊体验型	GaodeAPI_text(滑雪场)	119.733	31.1875	B0JK2ZPUOM	无锡市	低海拔人工造雪型	3	0	5.2743	0	0.384441	0.153777	Ⅰ 很低	162632900	1057.89	749.5	3.91387	0.301581	0.31717	0.350185	0.470153	0.359772	0	1	Ⅲ类 低资源-高产业型
178	6	上海市	上海市	上海市	上海市	松江区	滑雪馆	泗凯路650号新凯体育中心3层	待识别	待划分	城市综合体室内雪场型	GaodeAPI_text(滑雪小镇)	121.242	31.1119	B0JUVA56LQ	上海市	低海拔人工造雪型	3	0	5.25322	0	0.385111	0.154044	Ⅰ 很低	539267100	0		5.7535	1	0		0.694789	0.56493	0	1	Ⅲ类 低资源-高产业型
179	707	浙江省	湖州市	湖州市	湖州市	安吉县	安吉观音堂滑雪场(暂停营业)	上墅乡东坞村小岭头	待识别	待划分	城郊体验型	GaodeAPI_text(滑雪场)	119.596	30.4746	B0FFIG852B	湖州市	低海拔人工造雪型	3	0	5.23694	0	0.385627	0.154251	Ⅰ 很低	42134200	1284.83	343.9	1.77536	0.0781323	0.38521	0.160678	0.20902	0.20826	0	1	Ⅲ类 低资源-高产业型
180	376	山西省	运城市	运城市	运城市	盐湖区	凤凰欢乐谷滑雪场(暂停开放)	运城市凤凰谷东沟	待识别	待划分	滑雪+度假综合型	GaodeAPI_text(滑雪场)	111.042	34.9617	B0FFHJHTCE	运城市	低海拔人工造雪型	3	0	5.23601	0	0.385657	0.154263	Ⅰ 很低	21906000	231.8	470.56	0.992662	0.0406218	0.0694969	0.219857	0.113445	0.110855	0	0	Ⅳ类 低资源-低产业型
181	861	陕西省	西安市	西安市	西安市	灞桥区	西安热雪奇迹	国际港务区港务大道与绿茵路交汇处西南角	室内	待划分	城市综合体室内雪场型	GaodeAPI_text(热雪奇迹)	109.066	34.3709	B0JG1SDUNY	西安市	低海拔人工造雪型	3	0.00227273	5.23162	0.000213265	0.385796	0.154446	Ⅰ 很低	133177800	1882.42	1307.82	2.01536	0.246961	0.564376	0.611045	0.238326	0.415177	0	1	Ⅲ类 低资源-高产业型
182	719	湖北省	武汉市	武汉市	武汉市	蔡甸区	中润趣谷四季滑雪场	军山新城	待识别	待划分	城郊体验型	GaodeAPI_text(滑雪场)	114.124	30.4333	B0I6USDF53	武汉市	低海拔人工造雪型	3	0	5.22887	0	0.385884	0.154353	Ⅰ 很低	211062300	2906.29	1377.4	2.85035	0.391387	0.871347	0.643555	0.340286	0.561644	0	1	Ⅲ类 低资源-高产业型
183	251	山东省	日照市	日照市	日照市	五莲县	五莲山滑雪场	五莲山兰陵路(杜鹃山庄北、334省道南)	待识别	待划分	城郊体验型	GaodeAPI_text(滑雪场)	119.399	35.7051	B02790PB8Q	日照市	低海拔人工造雪型	3	0	5.21039	0	0.38647	0.154588	Ⅰ 很低	25568900	221.9	308.36	1.73341	0.0474142	0.0665288	0.144073	0.203898	0.115479	0	0	Ⅳ类 低资源-低产业型
184	677	河南省	郑州市	郑州市	郑州市	巩义市	探路者中岳嵩顶滑雪度假区	夹津口镇公川村内	待识别	待划分	滑雪+度假综合型	GaodeAPI_text(滑雪度假区)	113.007	34.5283	B0HK7SKYJS	郑州市	低海拔人工造雪型	3	0	5.20731	0	0.386568	0.154627	Ⅰ 很低	145321000	1401.1	1300.8	2.99446	0.269479	0.42007	0.607765	0.357884	0.413799	0	1	Ⅲ类 低资源-高产业型
185	286	山东省	济宁市	济宁市	济宁市	邹城市	峄山风景区滑雪场	峄山镇纪前村临菏路东100米	待识别	待划分	滑雪+度假综合型	GaodeAPI_text(滑雪场)	117.029	35.3017	B0FFF438H4	济宁市	低海拔人工造雪型	3	0.00454545	5.20657	0.00042653	0.386591	0.154892	Ⅰ 很低	58675000	453.1	824.05	1.31227	0.108805	0.135846	0.385016	0.152472	0.195535	0	1	Ⅲ类 低资源-高产业型
186	820	陕西省	咸阳市	咸阳市	咸阳市	旬邑县	雁岭冰雪嘉年华	清塬镇	待识别	待划分	城郊体验型	GaodeAPI_text(冰雪乐园)	108.54	35.0474	B0IKUCET5R	咸阳市	低海拔人工造雪型	3	0.0295455	5.15228	0.00277245	0.388315	0.156989	Ⅱ 较低	30012700	341.53	412.1	1.15529	0.0556546	0.102396	0.192543	0.133304	0.120974	0	0	Ⅳ类 低资源-低产业型
187	318	山东省	菏泽市	菏泽市	菏泽市	曹县	冰雪世界	闫店楼镇练庄行政村十字路口西南角	室内	待划分	城市综合体室内雪场型	GaodeAPI_text(冰雪世界)	115.587	34.7281	B0KUBUYZVD	菏泽市	低海拔人工造雪型	3	0	5.15024	0	0.388379	0.155352	Ⅰ 很低	48025800	124.2	863.55	1.26763	0.0890575	0.0372369	0.403471	0.147021	0.169197	0	1	Ⅲ类 低资源-高产业型
188	5	上海市	上海市	上海市	上海市	杨浦区	WINFLO滑雪·健身运动综合馆	黄兴路168号长阳创谷体育中心一楼	待识别	待划分	城市综合体室内雪场型	GaodeAPI_text(滑雪小镇)	121.531	31.2735	B0LG1H4KNL	上海市	低海拔人工造雪型	3	0	5.11104	0	0.389624	0.155849	Ⅰ 很低	539267100	0		5.7535	1	0		0.694789	0.56493	0	1	Ⅲ类 低资源-高产业型
189	851	陕西省	汉中市	汉中市	汉中市	南郑区	汉中龙头山滑雪场(暂停营业)	小南海镇汉中龙头山国际旅游度假区内(西南角)	待识别	待划分	城郊体验型	GaodeAPI_text(滑雪场)	106.97	32.736	B0FFM889IU	汉中市	低海拔人工造雪型	3	0	5.05716	0	0.391334	0.156534	Ⅰ 很低	0	0	0	0.513111	0	0	0	0.0548875	0.0137219	0	0	Ⅳ类 低资源-低产业型
190	853	陕西省	汉中市	汉中市	汉中市	汉台区	汉中冰雪奇幻世界(暂停营业)	滨江路文投影城(天汉店)1楼	待识别	待划分	城郊体验型	GaodeAPI_text(冰雪城)	107.013	33.0531	B0LARCDXKB	汉中市	低海拔人工造雪型	3	0	4.99818	0	0.393206	0.157282	Ⅱ 较低	0	0	0	0.513111	0	0	0	0.0548875	0.0137219	0	0	Ⅳ类 低资源-低产业型
191	9	上海市	上海市	上海市	上海市	浦东新区	耀雪冰雪世界	南汇新城镇沪城环路2088弄1-5号	室内	待划分	城市综合体室内雪场型	GaodeAPI_text(滑雪场)	121.906	30.9189	B0FFL5P95R	上海市	低海拔人工造雪型	3	0	4.9524	0	0.394659	0.157864	Ⅱ 较低	539267100	0		5.7535	1	0		0.694789	0.56493	0	1	Ⅲ类 低资源-高产业型
192	636	河南省	三门峡市	三门峡市	三门峡市	陕州区	甘山森林滑雪场	甘山国家森林公园内	待识别	待划分	城郊体验型	GaodeAPI_text(滑雪场)	111.208	34.5013	B0HBPHB24O	三门峡市	低海拔人工造雪型	3	0.025	4.92721	0.00234592	0.395459	0.159591	Ⅱ 较低	16186900	195.1	202	0.570534	0.0300165	0.0584937	0.0943793	0.0618994	0.0611972	0	0	Ⅳ类 低资源-低产业型
193	825	陕西省	商洛市	商洛市	商洛市	商州区	陕西商州牧护关滑雪场(暂停开放)	西北部牧护关生态旅游度假区	待识别	待划分	滑雪+度假综合型	GaodeAPI_text(滑雪场)	109.573	34.0434	B03920O7NB	商洛市	低海拔人工造雪型	3	0.0818182	4.92107	0.00767754	0.395654	0.162868	Ⅱ 较低	0	202.12	0	0.339888	0	0.0605984	0	0.0337353	0.0235834	0	0	Ⅳ类 低资源-低产业型
194	822	陕西省	咸阳市	咸阳市	咸阳市	渭城区	际华冰雪·西安冰雪中心	张裕路与景致一路交叉口东南340米	室内	待划分	城市综合体室内雪场型	GaodeAPI_text(滑雪中心)	108.789	34.392	B0KUZMZRTU	咸阳市	低海拔人工造雪型	3	0.0295455	4.89869	0.00277245	0.396364	0.160209	Ⅱ 较低	30012700	341.53	412.1	1.15529	0.0556546	0.102396	0.192543	0.133304	0.120974	0	0	Ⅳ类 低资源-低产业型
195	676	河南省	郑州市	郑州市	郑州市	巩义市	嵩顶滑雪度假区(暂停营业)	夹津口镇卧龙村	待识别	待划分	滑雪+度假综合型	GaodeAPI_text(滑雪场)	113.004	34.5311	B0FFGDVCKW	郑州市	低海拔人工造雪型	3	0	4.89564	0	0.396461	0.158584	Ⅱ 较低	145321000	1401.1	1300.8	2.99446	0.269479	0.42007	0.607765	0.357884	0.413799	0	1	Ⅲ类 低资源-高产业型
196	691	浙江省	宁波市	宁波市	宁波市	象山县	冰雪大世界	新桥镇神雕侠侣城鸳鸯二路7号9号	待识别	待划分	城市综合体室内雪场型	GaodeAPI_text(冰雪世界)	121.838	29.2863	B0KBK5DL1E	宁波市	低海拔人工造雪型	3	0	4.88382	0	0.396836	0.158734	Ⅱ 较低	181477000	1999.46	969.7	2.47056	0.336525	0.599466	0.453067	0.29391	0.420742	0	1	Ⅲ类 低资源-高产业型
197	327	山东省	青岛市	青岛市	青岛市	平度市	茶山风景区滑雪场(暂停营业)	琥珀杨家茶山风景区内(西南角)	待识别	待划分	滑雪+度假综合型	GaodeAPI_text(滑雪场)	119.982	36.9218	B0FFFRUFYT	青岛市	低海拔人工造雪型	3	0	4.79363	0	0.399699	0.15988	Ⅱ 较低	167194600	1019.3	1037.15	2.35537	0.31004	0.305601	0.484582	0.279845	0.345017	0	1	Ⅲ类 低资源-高产业型
198	656	河南省	洛阳市	洛阳市	洛阳市	嵩县	洛阳木札岭滑雪场(暂停营业)	车村镇龙王村	待识别	待划分	城郊体验型	GaodeAPI_text(滑雪场)	112.246	33.773	B0HKXRUNZ2	洛阳市	低海拔人工造雪型	3	0	4.77215	0	0.400381	0.160152	Ⅱ 较低	58186000	795.4	707.9	0.913638	0.107898	0.238472	0.330748	0.103796	0.195229	0	1	Ⅲ类 低资源-高产业型
199	817	重庆市	重庆市	重庆市	重庆市	石柱土家族自治县	石柱天山国际滑雪场	八龙村碓窝坝组	待识别	待划分	城郊体验型	GaodeAPI_text(滑雪场)	108.536	30.1701	B0K07U9BPT	重庆市	低海拔人工造雪型	3	0	4.7611	0	0.400732	0.160293	Ⅱ 较低	321931500	0		0.99409	0.59698	0		0.11362	0.236866	0	1	Ⅲ类 低资源-高产业型
200	871	青海省	海东市	海东市	海东市	平安区	平安莲花山滑雪场	古城乡青海省海东市石碑村188号	待识别	待划分	滑雪+度假综合型	GaodeAPI_text(滑雪场)	102	36.3085	B0JK6G32GE	海东市	低海拔人工造雪型	3	1.03409	4.74031	0.0970356	0.401392	0.218778	Ⅲ 中等	6054600	53.88	133.8	0.507025	0.0112275	0.016154	0.0625146	0.0541443	0.0360101	0	0	Ⅳ类 低资源-低产业型
201	12	上海市	上海市	上海市	上海市	闵行区	G·SNOW城市滑雪空间(古北店)	古北路1699号古北商业广场B2层	待识别	待划分	城市综合体室内雪场型	GaodeAPI_text(滑雪场)	121.403	31.1882	B0J3ZZWTKM	上海市	低海拔人工造雪型	3	0	4.72291	0	0.401944	0.160777	Ⅱ 较低	539267100	0		5.7535	1	0		0.694789	0.56493	0	1	Ⅲ类 低资源-高产业型
202	11	上海市	上海市	上海市	上海市	长宁区	雪酷城市滑雪空间(尚嘉中心)	仙霞路99号尚嘉中心B1层LG113	待识别	待划分	城市综合体室内雪场型	GaodeAPI_text(滑雪场)	121.407	31.2061	B0FFL7D8N9	上海市	低海拔人工造雪型	3	0	4.71178	0	0.402297	0.160919	Ⅱ 较低	539267100	0		5.7535	1	0		0.694789	0.56493	0	1	Ⅲ类 低资源-高产业型
203	728	湖南省	长沙市	长沙市	长沙市	浏阳市	赤马湖体育滑雪	沙市镇长春村赤马湖风景区(西北角)	待识别	待划分	城郊体验型	GaodeAPI_text(滑雪场)	113.429	28.3956	B0FFM7EOYO	长沙市	低海拔人工造雪型	3	0	4.69152	0	0.40294	0.161176	Ⅱ 较低	152687800	1661.32	1051.31	1.44892	0.283139	0.498087	0.491197	0.169159	0.360396	0	1	Ⅲ类 低资源-高产业型
204	711	浙江省	金华市	金华市	金华市	武义县	武义千丈岩滑雪场(暂停营业)	泉溪镇董源村千丈岩	待识别	待划分	城市综合体室内雪场型	GaodeAPI_text(冰雪世界)	119.897	28.7535	B0FFFQ3FZT	金华市	低海拔人工造雪型	3	0	4.68364	0	0.40319	0.161276	Ⅱ 较低	69255200	1298.6	716.3	1.66387	0.128425	0.389339	0.334673	0.195406	0.261961	0	1	Ⅲ类 低资源-高产业型
205	688	浙江省	宁波市	宁波市	宁波市	北仑区	梅山湾冰雪大世界	春晓镇春晓街道港博路6号中国港口博物馆南侧	待识别	待划分	城市综合体室内雪场型	GaodeAPI_text(冰雪世界)	121.911	29.7539	B0FFLECA3I	宁波市	低海拔人工造雪型	3	0	4.65845	0	0.40399	0.161596	Ⅱ 较低	181477000	1999.46	969.7	2.47056	0.336525	0.599466	0.453067	0.29391	0.420742	0	1	Ⅲ类 低资源-高产业型
206	745	甘肃省	兰州市	兰州市	兰州市	西固区	三河口冰雪世界	三河口天鹅滩景区内	室内	待划分	城市综合体室内雪场型	GaodeAPI_text(雪世界)	103.369	36.1218	B0KKO5PETF	兰州市	低海拔人工造雪型	3	0.402273	4.64373	0.0377479	0.404457	0.184432	Ⅱ 较低	37423000	421.4	442.51	1.03271	0.069396	0.126342	0.206751	0.118335	0.130206	0	0	Ⅳ类 低资源-低产业型
207	852	陕西省	汉中市	汉中市	汉中市	南郑区	龙头山冰雪乐园(暂停营业)	小南海龙头山	室内	待划分	城市综合体室内雪场型	GaodeAPI_text(冰雪乐园)	106.997	32.7515	B0K03ZW3CI	汉中市	低海拔人工造雪型	3	0	4.61156	0	0.405478	0.162191	Ⅱ 较低	0	0	0	0.513111	0	0	0	0.0548875	0.0137219	0	0	Ⅳ类 低资源-低产业型
208	710	浙江省	金华市	金华市	金华市	兰溪市	梦幻冰雪大世界	灵洞乡洞源村六洞山景区内	待识别	待划分	城市综合体室内雪场型	GaodeAPI_text(冰雪世界)	119.539	29.2074	B0G2UZ1W2W	金华市	低海拔人工造雪型	3	0	4.58054	0	0.406463	0.162585	Ⅱ 较低	69255200	1298.6	716.3	1.66387	0.128425	0.389339	0.334673	0.195406	0.261961	0	1	Ⅲ类 低资源-高产业型
209	512	江苏省	苏州市	苏州市	苏州市	吴中区	峰玩家滑雪馆(圆融时代广场店)	旺墩路268号圆融时代广场F1层	待识别	待划分	城市综合体室内雪场型	GaodeAPI_text(滑雪场)	120.711	31.3188	B0H6ACLMSR	苏州市	低海拔人工造雪型	3	0	4.56521	0	0.40695	0.16278	Ⅱ 较低	267269800	1147.52	1295.8	3.67673	0.495617	0.344043	0.605429	0.441196	0.471571	0	1	Ⅲ类 低资源-高产业型
210	496	江苏省	徐州市	徐州市	徐州市	贾汪区	徐州大景山滑雪场(暂停营业)	山水大道26号	待识别	待划分	城郊体验型	GaodeAPI_text(滑雪场)	117.537	34.434	B0FFFQ63YK	徐州市	低海拔人工造雪型	3	0.0295455	4.56132	0.00277245	0.407073	0.164493	Ⅱ 较低	95371200	323.59	902	1.31565	0.176853	0.0970168	0.421436	0.152885	0.212048	0	1	Ⅲ类 低资源-高产业型
211	256	山东省	枣庄市	枣庄市	枣庄市	薛城区	薛城日月山滑雪场(暂停营业)	森林公园绿道1号	待识别	待划分	城郊体验型	GaodeAPI_text(滑雪场)	117.365	34.7877	B0FFIR5DM6	枣庄市	低海拔人工造雪型	3	0	4.55171	0	0.407378	0.162951	Ⅱ 较低	23864100	132.5	380.98	1.77219	0.0442528	0.0397254	0.178003	0.208633	0.117654	0	0	Ⅳ类 低资源-低产业型
212	629	河北省	邯郸市	邯郸市	邯郸市	永年区	邯郸佛山滑雪场(暂停营业)	永合会镇新安村南	待识别	待划分	城郊体验型	GaodeAPI_text(滑雪场)	114.371	36.7254	B0HKTUH5RW	邯郸市	低海拔人工造雪型	3	0	4.54572	0	0.407568	0.163027	Ⅱ 较低	47043000	420.43	917.31	2.17237	0.0872351	0.126051	0.428589	0.257499	0.224844	0	1	Ⅲ类 低资源-高产业型
213	699	浙江省	杭州市	杭州市	杭州市	桐庐县	杭州生仙里国际滑雪场(暂停营业)	合村乡高凉亭村松树尖	待识别	待划分	城郊体验型	GaodeAPI_text(滑雪场)	119.252	29.9926	B0GKMCSN5K	杭州市	低海拔人工造雪型	3	0	4.54435	0	0.407612	0.163045	Ⅱ 较低	218603200	3335.4	1252.2	2.15564	0.405371	1	0.585058	0.255455	0.561471	0	1	Ⅲ类 低资源-高产业型
214	183	四川省	成都市	成都市	成都市	武侯区	yoski尤斯卡滑雪	高远一路15号1906创意工厂A10场馆	待识别	待划分	城郊体验型	GaodeAPI_text(滑雪场)	104.085	30.6129	B0I2PCKAOL	成都市	低海拔人工造雪型	3	0	4.44638	0	0.410722	0.164289	Ⅱ 较低	235113000	3005.2	2140.3	3.17627	0.435986	0.901001	1	0.380084	0.679268	0	1	Ⅲ类 低资源-高产业型
215	685	河南省	郑州市	郑州市	郑州市	金水区	极地冰雪小镇(郑州人民公园店)	西太康路58号(人民公园地铁站D口步行480米)	待识别	待划分	滑雪+度假综合型	GaodeAPI_text(滑雪场)	113.663	34.7579	B0IUOSAE12	郑州市	低海拔人工造雪型	3	0	4.38439	0	0.412689	0.165076	Ⅱ 较低	145321000	1401.1	1300.8	2.99446	0.269479	0.42007	0.607765	0.357884	0.413799	0	1	Ⅲ类 低资源-高产业型
216	269	山东省	济南市	济南市	济南市	历城区	卧虎山滑雪场(暂停营业)	仲宫街道卧虎路北13号	待识别	待划分	城郊体验型	GaodeAPI_text(滑雪场)	117.017	36.4444	B021306M6M	济南市	低海拔人工造雪型	3	0.0954545	4.29372	0.00895713	0.415567	0.171601	Ⅱ 较低	135276000	702.8	943.7	2.22687	0.250852	0.210709	0.440919	0.264154	0.291659	0	1	Ⅲ类 低资源-高产业型
217	377	山西省	运城市	运城市	运城市	盐湖区	南山新境滑雪场	南山新境市民广场生态体育公园鑫郁禾康体中心1层101室	待识别	待划分	城郊体验型	GaodeAPI_text(滑雪场)	111.07	34.9765	B0I0DAOC7E	运城市	低海拔人工造雪型	3	0	4.23926	0	0.417296	0.166918	Ⅱ 较低	21906000	231.8	470.56	0.992662	0.0406218	0.0694969	0.219857	0.113445	0.110855	0	0	Ⅳ类 低资源-低产业型
218	612	河北省	邢台市	邢台市	邢台市	信都区	九龙山滑雪场(暂停营业)	太子井乡323省道九龙山一家亲游乐园北130米	待识别	待划分	城郊体验型	GaodeAPI_text(滑雪场)	114.258	37.0663	B0J3UL1SMR	邢台市	低海拔人工造雪型	3	0.00909091	4.23523	0.00085306	0.417424	0.167482	Ⅱ 较低	27659000	191.23	695.55	2.06729	0.05129	0.0573335	0.324978	0.244667	0.169567	0	1	Ⅲ类 低资源-高产业型
219	865	陕西省	西安市	西安市	西安市	长安区	西安沣峪庄园滑雪场	滦镇青岗树村即沣峪口进山22公里处	待识别	待划分	城郊体验型	GaodeAPI_text(滑雪场)	108.856	33.8988	B001D08LYP	西安市	低海拔人工造雪型	3	0.00227273	4.21191	0.000213265	0.418164	0.167394	Ⅱ 较低	133177800	1882.42	1307.82	2.01536	0.246961	0.564376	0.611045	0.238326	0.415177	0	1	Ⅲ类 低资源-高产业型
220	713	湖北省	咸宁市	咸宁市	咸宁市	咸安区	际华冰雪·香城滑雪馆	和谐大道与桂乡大道交叉口西240米	待识别	待划分	城市综合体室内雪场型	GaodeAPI_text(滑雪场)	114.285	29.9582	B0IRT5DLDU	咸宁市	低海拔人工造雪型	3	0	4.17588	0	0.419308	0.167723	Ⅱ 较低	19445700	355	260.84	0.496531	0.0360595	0.106434	0.121871	0.0528629	0.0793068	0	0	Ⅳ类 低资源-低产业型
221	192	四川省	阿坝藏族羌族自治州	阿坝藏族羌族自治州	阿坝藏族羌族自治州	理县	鹧鸪山冰雪世界	Z034北50米	室内	待划分	城市综合体室内雪场型	GaodeAPI_text(冰雪大世界)	102.743	31.8781	B0FFHNSUO8	阿坝藏族羌族自治州	低海拔人工造雪型	3	4.11364	4.15424	0.38601	0.419995	0.399604	Ⅴ 很高			82.5	0.192922			0.038546	0.0157894	0.0271677	1	0	Ⅱ类 高资源-低产业型
222	631	河北省	邯郸市	邯郸市	邯郸市	涉县	太行五指山滑雪场(暂停营业)	河南店镇南庄村五指山景区内	待识别	待划分	城郊体验型	GaodeAPI_text(滑雪场)	113.659	36.5193	B0HKXUSS0G	邯郸市	低海拔人工造雪型	3	0	4.1494	0	0.420148	0.168059	Ⅱ 较低	47043000	420.43	917.31	2.17237	0.0872351	0.126051	0.428589	0.257499	0.224844	0	1	Ⅲ类 低资源-高产业型
223	227	安徽省	合肥市	合肥市	合肥市	蜀山区	HiMount海山轻极限城市滑雪空间	港汇广场7楼(洪岗地铁站D2口步行290米)	待识别	待划分	城市综合体室内雪场型	GaodeAPI_text(滑雪场)	117.232	31.8337	B0I1Z7N0XY	合肥市	低海拔人工造雪型	3	0	4.14251	0	0.420367	0.168147	Ⅱ 较低	135077000	976.78	985.3	1.80622	0.250483	0.292852	0.460356	0.212789	0.30412	0	1	Ⅲ类 低资源-高产业型
224	686	河南省	鹤壁市	鹤壁市	鹤壁市	淇滨区	必捷滑雪场(暂停营业)	上峪乡桑园村桑园小镇	待识别	待划分	城郊体验型	GaodeAPI_text(滑雪场)	114.128	35.8283	B0FFI9N2ET	鹤壁市	低海拔人工造雪型	3	0.025	4.11424	0.00234592	0.421265	0.169913	Ⅱ 较低	10943900	83.73	156.8	3.1716	0.020294	0.0251034	0.0732608	0.379514	0.124543	0	0	Ⅳ类 低资源-低产业型
225	854	陕西省	汉中市	汉中市	汉中市	留坝县	紫柏山国际滑雪场(暂停营业)	留候镇留张路营盘村红水河畔	待识别	待划分	城郊体验型	GaodeAPI_text(滑雪场)	106.725	33.6072	B0FFILBHR0	汉中市	低海拔人工造雪型	3	0	4.10399	0	0.42159	0.168636	Ⅱ 较低	0	0	0	0.513111	0	0	0	0.0548875	0.0137219	0	0	Ⅳ类 低资源-低产业型
226	522	江苏省	连云港市	连云港市	连云港市	连云区	白龙潭生态园滑雪场	韩李站南500米(白龙潭生态园)	待识别	待划分	城郊体验型	GaodeAPI_text(滑雪场)	119.291	34.6695	B0FFFPMWV4	连云港市	低海拔人工造雪型	3	0.0113636	4.10161	0.00106633	0.421665	0.169306	Ⅱ 较低	46631300	587.93	459.4	2.28864	0.0864716	0.17627	0.214643	0.271697	0.18727	0	1	Ⅲ类 低资源-高产业型
227	184	四川省	成都市	成都市	成都市	武侯区	成都坦克滑雪俱乐部	锦城大道1999号美洲四季滑雪场内	待识别	待划分	城郊体验型	GaodeAPI_text(滑雪场)	104.033	30.5781	B0FFLI46IX	成都市	低海拔人工造雪型	3	0	4.04952	0	0.423319	0.169328	Ⅱ 较低	235113000	3005.2	2140.3	3.17627	0.435986	0.901001	1	0.380084	0.679268	0	1	Ⅲ类 低资源-高产业型
228	834	陕西省	延安市	延安市	延安市	宝塔区	圣地河谷·金延安冰雪世界	圣地河谷金延安园区	室内	待划分	城市综合体室内雪场型	GaodeAPI_text(冰雪城)	109.448	36.6561	B0JK2AVARS	延安市	低海拔人工造雪型	3	0	4.00179	0	0.424834	0.169934	Ⅱ 较低	23833600	108.96	226.14	0.324094	0.0441963	0.0326677	0.105658	0.0318067	0.0535822	0	0	Ⅳ类 低资源-低产业型
229	590	河北省	沧州市	沧州市	沧州市	运河区	绿博园滑雪场	刘辛庄村西洼东区东A29号	待识别	待划分	城郊体验型	GaodeAPI_text(滑雪场)	116.84	38.2694	B0JKSMPE1N	沧州市	低海拔人工造雪型	3	0.0204545	3.9643	0.00191939	0.426024	0.171561	Ⅱ 较低	47228000	118.78	726.46	2.12456	0.0875781	0.0356119	0.33942	0.25166	0.178568	0	1	Ⅲ类 低资源-高产业型
230	330	山西省	临汾市	临汾市	临汾市	乡宁县	云丘山滑雪场(暂停营业)	关王庙乡云丘山景区(东南角)	待识别	待划分	城郊体验型	GaodeAPI_text(滑雪场)	111.027	35.7419	B0I6AC5D6Q	临汾市	低海拔人工造雪型	3	0.0409091	3.96332	0.00383877	0.426055	0.172725	Ⅱ 较低	24387000	301.21	388.72	0.531624	0.0452225	0.090307	0.181619	0.0571481	0.0935743	0	0	Ⅳ类 低资源-低产业型
231	254	山东省	枣庄市	枣庄市	枣庄市	滕州市	莲青山滑雪场(暂停营业)	东郭镇莲青山风景区	待识别	待划分	城郊体验型	GaodeAPI_text(滑雪场)	117.304	35.2672	B02780RHP8	枣庄市	低海拔人工造雪型	3	0	3.90058	0	0.428047	0.171219	Ⅱ 较低	23864100	132.5	380.98	1.77219	0.0442528	0.0397254	0.178003	0.208633	0.117654	0	0	Ⅳ类 低资源-低产业型
232	828	陕西省	安康市	安康市	安康市	平利县	天书峡景区冰雪乐园(暂停营业)	天书峡	室内	待划分	城市综合体室内雪场型	GaodeAPI_text(冰雪乐园)	109.31	32.0124	B0L6GCGKVT	安康市	低海拔人工造雪型	3	0	3.89448	0	0.42824	0.171296	Ⅱ 较低	0	75.38	0	0.450143	0	0.0226	0	0.0471985	0.0174496	0	0	Ⅳ类 低资源-低产业型
233	222	宁夏回族自治区	银川市	银川市	银川市	西夏区	西夏风情园滑雪场(暂停营业)	宁华路街道北京西路1496号西夏风情园内(东侧)	待识别	待划分	城郊体验型	GaodeAPI_text(滑雪场)	106.042	38.4793	B0FFFR5ZKI	银川市	低海拔人工造雪型	3	0	3.86752	0	0.429096	0.171638	Ⅱ 较低	29395300	0	290.81	1.21049	0.0545097	0	0.135873	0.140044	0.0826067	0	0	Ⅳ类 低资源-低产业型
234	513	江苏省	苏州市	苏州市	苏州市	张家港市	OASIS·城市滑雪	戴巷路288号金茂览秀城F4层	待识别	待划分	城市综合体室内雪场型	GaodeAPI_text(滑雪场)	120.571	31.8837	B0JBMCY8E1	苏州市	低海拔人工造雪型	3	0	3.85756	0	0.429412	0.171765	Ⅱ 较低	267269800	1147.52	1295.8	3.67673	0.495617	0.344043	0.605429	0.441196	0.471571	0	1	Ⅲ类 低资源-高产业型
235	516	江苏省	苏州市	苏州市	苏州市	虎丘区	苏州热雪奇迹	龙塘港路599号	室内	待划分	城市综合体室内雪场型	GaodeAPI_text(热雪奇迹)	120.394	31.3565	B0LRHA81L3	苏州市	低海拔人工造雪型	3	0	3.84434	0	0.429832	0.171933	Ⅱ 较低	267269800	1147.52	1295.8	3.67673	0.495617	0.344043	0.605429	0.441196	0.471571	0	1	Ⅲ类 低资源-高产业型
236	316	山东省	菏泽市	菏泽市	菏泽市	定陶区	仿山滑雪场(暂停营业)	仿山乡仿山风景区内	待识别	待划分	城郊体验型	GaodeAPI_text(滑雪场)	115.553	35.1221	B0FFFQSQM0	菏泽市	低海拔人工造雪型	3	0	3.84335	0	0.429863	0.171945	Ⅱ 较低	48025800	124.2	863.55	1.26763	0.0890575	0.0372369	0.403471	0.147021	0.169197	0	1	Ⅲ类 低资源-高产业型
237	214	宁夏回族自治区	固原市	固原市	固原市	泾源县	宁夏雅豪国际滑雪度假区(暂停营业)	新旗村宁夏娅豪国际滑雪度假区	待识别	待划分	滑雪+度假综合型	GaodeAPI_text(滑雪度假区)	106.333	35.4505	B0FFL6YON6	固原市	低海拔人工造雪型	3	0.422727	3.81158	0.0396673	0.430872	0.196149	Ⅱ 较低	4637300	0	114.77	0.612601	0.00859926	0	0.0536233	0.0670362	0.0323147	0	0	Ⅳ类 低资源-低产业型
238	870	青海省	海东市	海东市	海东市	互助土族自治县	古城山彩虹滑雪场(暂停营业)	彩虹部落土族园西侧	待识别	待划分	城郊体验型	GaodeAPI_text(滑雪场)	101.935	36.8335	B0FFGAIVP7	海东市	低海拔人工造雪型	3	1.03409	3.78154	0.0970356	0.431825	0.230951	Ⅲ 中等	6054600	53.88	133.8	0.507025	0.0112275	0.016154	0.0625146	0.0541443	0.0360101	1	0	Ⅱ类 高资源-低产业型
239	259	山东省	泰安市	泰安市	泰安市	岱岳区	石敢当滑雪场(暂停营业)	旅游经济开发区天平街道石敢当街泰山石敢当文化园内滑草场区域	待识别	待划分	城郊体验型	GaodeAPI_text(滑雪场)	117.013	36.2121	B0J09SLMV6	泰安市	低海拔人工造雪型	3	0.0477273	3.76717	0.00447857	0.432281	0.1756	Ⅱ 较低	36221000	482.1	534.87	1.54469	0.0671671	0.14454	0.249904	0.180853	0.160616	0	1	Ⅲ类 低资源-高产业型
240	514	江苏省	苏州市	苏州市	苏州市	昆山市	雪遇城市滑雪俱乐部	大渔街与武汉大学路交叉口南60米	待识别	待划分	城市综合体室内雪场型	GaodeAPI_text(滑雪场)	120.896	31.4111	B0HA7MZME3	苏州市	低海拔人工造雪型	3	0	3.73021	0	0.433454	0.173382	Ⅱ 较低	267269800	1147.52	1295.8	3.67673	0.495617	0.344043	0.605429	0.441196	0.471571	0	1	Ⅲ类 低资源-高产业型
241	317	山东省	菏泽市	菏泽市	菏泽市	巨野县	白虎山滑雪场(暂停营业)	核桃园镇白虎山景区内(北侧)	待识别	待划分	城郊体验型	GaodeAPI_text(滑雪场)	116.261	35.2625	B0H2FSLGSI	菏泽市	低海拔人工造雪型	3	0	3.69601	0	0.43454	0.173816	Ⅱ 较低	48025800	124.2	863.55	1.26763	0.0890575	0.0372369	0.403471	0.147021	0.169197	0	1	Ⅲ类 低资源-高产业型
242	746	甘肃省	庆阳市	庆阳市	庆阳市	西峰区	乐翻天冰雪乐园(暂停营业)	北京大道东湖公园东门北侧	室内	待划分	城市综合体室内雪场型	GaodeAPI_text(冰雪乐园)	107.655	35.7401	B0K0KSDQSQ	庆阳市	低海拔人工造雪型	3	0	3.67749	0	0.435128	0.174051	Ⅱ 较低	12132200	43.1	213.25	0.464542	0.0224976	0.012922	0.0996356	0.0489568	0.046003	0	0	Ⅳ类 低资源-低产业型
243	505	江苏省	无锡市	无锡市	无锡市	梁溪区	FEARLESS无畏滑雪俱乐部(锡上MONO店)	梁溪区东岭锡上MONO6楼	待识别	待划分	城郊体验型	GaodeAPI_text(滑雪场)	120.304	31.5777	B0JRR9VVEG	无锡市	低海拔人工造雪型	3	0	3.56043	0	0.438844	0.175538	Ⅱ 较低	162632900	1057.89	749.5	3.91387	0.301581	0.31717	0.350185	0.470153	0.359772	0	1	Ⅲ类 低资源-高产业型
244	826	陕西省	安康市	安康市	安康市	宁陕县	秦岭四季滑雪场(暂停营业)	210国道绿都山庄对面	待识别	待划分	城郊体验型	GaodeAPI_text(滑雪场)	108.704	33.7563	B0FFH0HDQA	安康市	低海拔人工造雪型	3	0	3.55905	0	0.438888	0.175555	Ⅱ 较低	0	75.38	0	0.450143	0	0.0226	0	0.0471985	0.0174496	0	0	Ⅳ类 低资源-低产业型
245	730	甘肃省	临夏回族自治州	临夏回族自治州	临夏回族自治州	康乐县	康乐白桦林冰雪乐园	白桦林景区售票处东侧150米	室内	待划分	城市综合体室内雪场型	GaodeAPI_text(冰雪世界)	103.448	35.2751	B0FFK76BH4	临夏回族自治州	低海拔人工造雪型	3	0.772727	3.5444	0.0725101	0.439353	0.219247	Ⅲ 中等			210.11	1.25903			0.0981685	0.145971	0.12207	0	0	Ⅳ类 低资源-低产业型
246	238	山东省	临沂市	临沂市	临沂市	莒南县	茶溪川滑雪场(暂停营业)	洙边镇府前街村7号镇政府东800米往北	待识别	待划分	城郊体验型	GaodeAPI_text(滑雪场)	118.872	35.0925	B0G0HZHEDY	临沂市	低海拔人工造雪型	3	0.0340909	3.48643	0.00319898	0.441193	0.178396	Ⅱ 较低	65558000	475.6	1094.38	1.87332	0.121569	0.142592	0.511321	0.220982	0.249116	0	1	Ⅲ类 低资源-高产业型
247	630	河北省	邯郸市	邯郸市	邯郸市	永年区	青青冰雪小镇(暂停营业)	永合会镇新安村(佛山景区西南1公里)	待识别	待划分	滑雪+度假综合型	GaodeAPI_text(滑雪场)	114.367	36.7233	B0FFI0JV4Y	邯郸市	低海拔人工造雪型	3	0	3.4743	0	0.441578	0.176631	Ⅱ 较低	47043000	420.43	917.31	2.17237	0.0872351	0.126051	0.428589	0.257499	0.224844	0	1	Ⅲ类 低资源-高产业型
248	503	江苏省	无锡市	无锡市	无锡市	宜兴市	宜兴梅园滑雪场(暂停营业)	新长线与宁杭高铁交汇处附近	待识别	待划分	城郊体验型	GaodeAPI_text(滑雪场)	119.797	31.3144	B0FFHJLV0C	无锡市	低海拔人工造雪型	3	0	3.46882	0	0.441752	0.176701	Ⅱ 较低	162632900	1057.89	749.5	3.91387	0.301581	0.31717	0.350185	0.470153	0.359772	0	1	Ⅲ类 低资源-高产业型
249	616	河北省	邢台市	邢台市	邢台市	信都区	邢台玉泉山滑雪场(暂停营业)	皇寺镇玉泉山渡假村内	待识别	待划分	城郊体验型	GaodeAPI_text(滑雪场)	114.348	37.1821	B0FFFJDDFL	邢台市	低海拔人工造雪型	3	0.00909091	3.37181	0.00085306	0.444831	0.178444	Ⅱ 较低	27659000	191.23	695.55	2.06729	0.05129	0.0573335	0.324978	0.244667	0.169567	0	1	Ⅲ类 低资源-高产业型
250	491	江苏省	南京市	南京市	南京市	浦口区	金陵冰雪大世界(暂停营业)	岔琥路29号	待识别	待划分	城市综合体室内雪场型	GaodeAPI_text(冰雪世界)	118.594	32.1264	B0L66CM3UT	南京市	低海拔人工造雪型	3	0	3.31611	0	0.446599	0.17864	Ⅱ 较低	185008100	1822.64	954.7	2.87093	0.343073	0.546453	0.446059	0.3428	0.419596	0	1	Ⅲ类 低资源-高产业型
251	941	西藏自治区	日喀则市	日喀则市		江孜县	江孜滑雪场		户外		城郊体验型	手工补录：锡林浩特市正达滑雪场.docx	89.6045	28.9148		日喀则市	低海拔人工造雪型	3	0.245455	3.25736	0.0230326	0.448464	0.193205	Ⅱ 较低										0	0	Ⅳ类 低资源-低产业型
252	517	江苏省	连云港市	连云港市	连云港市	东海县	东海湖西滑雪场	[]	待识别	待划分	城郊体验型	GaodeAPI_text(滑雪场)	118.691	34.5462	B0KB4HZL97	连云港市	低海拔人工造雪型	3	0.0113636	3.24028	0.00106633	0.449006	0.180242	Ⅱ 较低	46631300	587.93	459.4	2.28864	0.0864716	0.17627	0.214643	0.271697	0.18727	0	1	Ⅲ类 低资源-高产业型
253	867	陕西省	铜川市	铜川市	铜川市	宜君县	花溪谷冰雪乐园(暂停营业)	兴宜路13号	室内	待划分	城市综合体室内雪场型	GaodeAPI_text(冰雪乐园)	109.125	35.3986	B0JKY71W67	铜川市	低海拔人工造雪型	3	0.184091	3.21513	0.0172745	0.449804	0.190286	Ⅱ 较低	5888200	52.6	70.49	0.648789	0.0109189	0.0157702	0.0329346	0.0714551	0.0327697	0	0	Ⅳ类 低资源-低产业型
254	499	江苏省	徐州市	徐州市	徐州市	铜山区	徐州园博园滑雪场	徐州市园博园内(东侧)	待识别	待划分	城郊体验型	GaodeAPI_text(滑雪场)	117.494	34.1589	B0KKFSNE42	徐州市	低海拔人工造雪型	3	0.0295455	3.19491	0.00277245	0.450446	0.181842	Ⅱ 较低	95371200	323.59	902	1.31565	0.176853	0.0970168	0.421436	0.152885	0.212048	0	1	Ⅲ类 低资源-高产业型
255	494	江苏省	常州市	常州市	常州市	武进区	常州龙凤谷滑雪场	雪堰镇凤凰村委潘村288号	待识别	待划分	城郊体验型	GaodeAPI_text(滑雪场)	120.031	31.5421	B0FFGRCYWP	常州市	低海拔人工造雪型	3	0	3.17988	0	0.450923	0.180369	Ⅱ 较低	108135900	829.23	537.5	3.47053	0.200524	0.248615	0.251133	0.416017	0.279072	0	1	Ⅲ类 低资源-高产业型
256	824	陕西省	咸阳市	咸阳市	咸阳市	礼泉县	袁家村必捷滑雪场(暂停营业)	烟霞镇礼泉县烟霞镇关中印象之地袁家村北	待识别	待划分	城郊体验型	GaodeAPI_text(滑雪场)	108.527	34.6071	B0FFGEX8ST	咸阳市	低海拔人工造雪型	3	0.0295455	3.17982	0.00277245	0.450925	0.182034	Ⅱ 较低	30012700	341.53	412.1	1.15529	0.0556546	0.102396	0.192543	0.133304	0.120974	0	0	Ⅳ类 低资源-低产业型
257	240	山东省	临沂市	临沂市	临沂市	郯城县	望海楼滑雪场(暂停营业)	红花镇大尚庄山外岩村东望海楼景区内	待识别	待划分	城郊体验型	GaodeAPI_text(滑雪场)	118.406	34.4669	B0HUHAKJZQ	临沂市	低海拔人工造雪型	3	0.0340909	3.14207	0.00319898	0.452124	0.182769	Ⅱ 较低	65558000	475.6	1094.38	1.87332	0.121569	0.142592	0.511321	0.220982	0.249116	0	1	Ⅲ类 低资源-高产业型
258	639	河南省	南阳市	南阳市	南阳市	南召县	南召猿人山滑雪场(暂停营业)	马市坪乡杨盘村小鱼岭组	待识别	待划分	城郊体验型	GaodeAPI_text(滑雪场)	112.302	33.6894	B0FFHKETMJ	南阳市	低海拔人工造雪型	3	0	3.13729	0	0.452275	0.18091	Ⅱ 较低	48790800	227.12	949.7	0.759692	0.0904761	0.0680938	0.443723	0.0849974	0.171823	0	1	Ⅲ类 低资源-高产业型
259	273	山东省	济南市	济南市	济南市	商河县	鹤鸣湖冰雪乐园(暂停营业)	张坊镇鹤鸣湖七彩庄园内(东北角)	室内	待划分	城市综合体室内雪场型	GaodeAPI_text(滑雪场)	117.116	37.3341	B0FFLPFT2B	济南市	低海拔人工造雪型	3	0.0954545	3.12857	0.00895713	0.452552	0.186395	Ⅱ 较低	135276000	702.8	943.7	2.22687	0.250852	0.210709	0.440919	0.264154	0.291659	0	1	Ⅲ类 低资源-高产业型
260	230	安徽省	马鞍山市	马鞍山市	马鞍山市	和县	郑蒲港圣祥冰雪世界	郑蒲港新区中飞大道277号	室内	待划分	城市综合体室内雪场型	GaodeAPI_text(滑雪场)	118.336	31.6229	B0FFI0OID1	马鞍山市	低海拔人工造雪型	3	0	3.11633	0	0.452941	0.181176	Ⅱ 较低	27846500	204.25	219.1	1.51296	0.0516377	0.061237	0.102369	0.176979	0.0980556	0	0	Ⅳ类 低资源-低产业型
261	275	山东省	济南市	济南市	济南市	天桥区	黄河公园冰雪大世界(暂停营业)	泺口街道济泺路与二环北路交叉口路北	待识别	待划分	城市综合体室内雪场型	GaodeAPI_text(冰雪世界)	116.994	36.7235	B0HRUSFVT5	济南市	低海拔人工造雪型	3	0.0954545	3.10963	0.00895713	0.453153	0.186636	Ⅱ 较低	135276000	702.8	943.7	2.22687	0.250852	0.210709	0.440919	0.264154	0.291659	0	1	Ⅲ类 低资源-高产业型
262	741	甘肃省	兰州市	兰州市	兰州市	皋兰县	兰州新天地滑雪场	兰州新区西岔镇南绕城经三十三路与农博南路交汇处东500米	待识别	待划分	城郊体验型	GaodeAPI_text(滑雪场)	103.799	36.4281	B0FFLMYMEL	兰州市	低海拔人工造雪型	3	0.402273	3.10155	0.0377479	0.45341	0.204013	Ⅱ 较低	37423000	421.4	442.51	1.03271	0.069396	0.126342	0.206751	0.118335	0.130206	0	0	Ⅳ类 低资源-低产业型
263	315	山东省	聊城市	聊城市	聊城市	茌平区	茌平滑雪场	新政路最西头路北	待识别	待划分	城郊体验型	GaodeAPI_text(滑雪场)	116.213	36.5869	B0J6JZ9O8Q	聊城市	低海拔人工造雪型	3	0.00681818	3.10111	0.000639795	0.453424	0.181753	Ⅱ 较低	31679600	130.3	585.93	1.479	0.0587457	0.0390658	0.273761	0.172831	0.136101	0	0	Ⅳ类 低资源-低产业型
264	643	河南省	安阳市	安阳市	安阳市	林州市	安阳林州太行山国际滑雪场(暂停营业)	合涧镇北小庄村凤凰大道西太行山滑雪场内	待识别	待划分	城郊体验型	GaodeAPI_text(滑雪场)	113.737	36.0191	B0FFFP9ML9	安阳市	低海拔人工造雪型	3	0.0295455	3.04952	0.00277245	0.455061	0.183688	Ⅱ 较低	26720600	361.23	537.6	2.21085	0.0495498	0.108302	0.25118	0.262197	0.167807	0	1	Ⅲ类 低资源-高产业型
265	821	陕西省	咸阳市	咸阳市	咸阳市	泾阳县	龙泉国际滑雪场(暂停营业)	龙泉公社内(西北角)	待识别	待划分	城郊体验型	GaodeAPI_text(滑雪场)	108.898	34.6903	B0JKHHBSLY	咸阳市	低海拔人工造雪型	3	0.0295455	2.96567	0.00277245	0.457723	0.184753	Ⅱ 较低	30012700	341.53	412.1	1.15529	0.0556546	0.102396	0.192543	0.133304	0.120974	0	0	Ⅳ类 低资源-低产业型
266	744	甘肃省	兰州市	兰州市	兰州市	皋兰县	百花动感体育冰雪乐园	中川园区彩虹城中心社区百花公园内1号	室内	待划分	城市综合体室内雪场型	GaodeAPI_text(冰雪世界)	103.689	36.4902	B0KKJ9YMYR	兰州市	低海拔人工造雪型	3	0.402273	2.95397	0.0377479	0.458094	0.205886	Ⅱ 较低	37423000	421.4	442.51	1.03271	0.069396	0.126342	0.206751	0.118335	0.130206	0	0	Ⅳ类 低资源-低产业型
267	285	山东省	济宁市	济宁市	济宁市	曲阜市	蜗牛谷室内滑雪(暂停营业)	石门山镇石门山村远东大学南	室内	待划分	城市综合体室内雪场型	GaodeAPI_text(滑雪场)	117.111	35.7763	B0G0TSD2O6	济宁市	低海拔人工造雪型	3	0.00454545	2.9411	0.00042653	0.458503	0.183657	Ⅱ 较低	58675000	453.1	824.05	1.31227	0.108805	0.135846	0.385016	0.152472	0.195535	0	1	Ⅲ类 低资源-高产业型
268	115	北京市	北京市	北京市	北京市	通州区	密雪行踪滑雪馆	米开TOWN文创园E座	待识别	待划分	城市综合体室内雪场型	GaodeAPI_text(滑雪场)	116.657	39.9024	B0I2H769P3	北京市	低海拔人工造雪型	3	0	2.91234	0	0.459416	0.183766	Ⅱ 较低	498431000	2914		4.08856	0.924275	0.873658		0.491484	0.763139	0	1	Ⅲ类 低资源-高产业型
269	380	山西省	长治市	长治市	长治市	潞城区	西南山高山滑雪场	潞华街道站前路40号	待识别	待划分	体育赛事/训练型	GaodeAPI_text(滑雪场)	113.219	36.3133	B0JKCCMSQI	长治市	低海拔人工造雪型	3	0.284091	2.88892	0.0266581	0.460159	0.200058	Ⅱ 较低	25934000	271.22	312.66	0.786299	0.0480912	0.0813156	0.146082	0.0882464	0.0909339	0	0	Ⅳ类 低资源-低产业型
270	649	河南省	平顶山市	平顶山市	平顶山市	鲁山县	鲁山天龙池滑雪世界(暂停营业)	尧山镇四道河村天龙池景区内	室内	待划分	城市综合体室内雪场型	GaodeAPI_text(滑雪场)	112.313	33.7469	B01770NNWV	平顶山市	低海拔人工造雪型	3	0	2.88353	0	0.46033	0.184132	Ⅱ 较低	28319700	0	492	0.913446	0.0525152	0	0.229874	0.103772	0.0965404	0	0	Ⅳ类 低资源-低产业型
271	635	河南省	三门峡市	三门峡市	三门峡市	灵宝市	汉山滑雪场	032县道汉山景区内金佛寺旁边	待识别	待划分	城郊体验型	GaodeAPI_text(滑雪场)	110.536	34.4716	B0K61ASQAI	三门峡市	低海拔人工造雪型	3	0.025	2.87644	0.00234592	0.460555	0.18563	Ⅱ 较低	16186900	195.1	202	0.570534	0.0300165	0.0584937	0.0943793	0.0618994	0.0611972	0	0	Ⅳ类 低资源-低产业型
272	659	河南省	洛阳市	洛阳市	洛阳市	栾川县	洛阳伏牛山滑雪乐园	石庙乡伏牛山老界岭北坡	待识别	待划分	滑雪+度假综合型	GaodeAPI_text(滑雪场)	111.486	33.742	B0K0VKCB73	洛阳市	低海拔人工造雪型	3	0	2.86922	0	0.460784	0.184314	Ⅱ 较低	58186000	795.4	707.9	0.913638	0.107898	0.238472	0.330748	0.103796	0.195229	0	1	Ⅲ类 低资源-高产业型
273	654	河南省	洛阳市	洛阳市	洛阳市	伊川县	天室山滑雪场(暂停开放)	葛寨乡张棉村天室山景区	待识别	待划分	滑雪+度假综合型	GaodeAPI_text(滑雪场)	112.403	34.2351	B0FFIQ5TWG	洛阳市	低海拔人工造雪型	3	0	2.86449	0	0.460935	0.184374	Ⅱ 较低	58186000	795.4	707.9	0.913638	0.107898	0.238472	0.330748	0.103796	0.195229	0	1	Ⅲ类 低资源-高产业型
274	331	山西省	临汾市	临汾市	临汾市	尧都区	九龙山滑雪场(暂停营业)	土门镇西环与北环交汇处九龙山森林公园内(大唐热电往西2公里)	待识别	待划分	城郊体验型	GaodeAPI_text(滑雪场)	111.455	36.1698	B0FFF00QL7	临汾市	低海拔人工造雪型	3	0.0409091	2.85393	0.00383877	0.46127	0.186811	Ⅱ 较低	24387000	301.21	388.72	0.531624	0.0452225	0.090307	0.181619	0.0571481	0.0935743	0	0	Ⅳ类 低资源-低产业型
275	640	河南省	南阳市	南阳市	南阳市	方城县	七峰山滑雪场(暂停营业)	七峰山生态旅游区	待识别	待划分	城郊体验型	GaodeAPI_text(滑雪场)	112.949	33.405	B0FFFPUOWC	南阳市	低海拔人工造雪型	3	0	2.8498	0	0.461401	0.18456	Ⅱ 较低	48790800	227.12	949.7	0.759692	0.0904761	0.0680938	0.443723	0.0849974	0.171823	0	1	Ⅲ类 低资源-高产业型
276	355	山西省	晋中市	晋中市	晋中市	榆次区	九龙国际滑雪场	民航路156号五龙沟体育训练基地	待识别	待划分	城郊体验型	GaodeAPI_text(滑雪场)	112.682	37.7932	B0FFGDW9S4	晋中市	低海拔人工造雪型	3	0.025	2.79271	0.00234592	0.463213	0.186693	Ⅱ 较低	24588000	407.9	337.65	0.682164	0.0455952	0.122294	0.157758	0.0755305	0.100295	0	0	Ⅳ类 低资源-低产业型
277	662	河南省	洛阳市	洛阳市	洛阳市	洛龙区	南山牡丹文化园滑雪场	南山牡丹文化园	待识别	待划分	城郊体验型	GaodeAPI_text(滑雪场)	112.457	34.58	B0KK0MCVGH	洛阳市	低海拔人工造雪型	3	0	2.78804	0	0.463361	0.185345	Ⅱ 较低	58186000	795.4	707.9	0.913638	0.107898	0.238472	0.330748	0.103796	0.195229	0	1	Ⅲ类 低资源-高产业型
278	375	山西省	运城市	运城市	运城市	河津市	西窑沟滑雪场	赵家庄乡史恩庄村西沟内	待识别	待划分	城郊体验型	GaodeAPI_text(滑雪场)	110.759	35.6002	B0FFK64LJ6	运城市	低海拔人工造雪型	3	0	2.76784	0	0.464003	0.185601	Ⅱ 较低	21906000	231.8	470.56	0.992662	0.0406218	0.0694969	0.219857	0.113445	0.110855	0	0	Ⅳ类 低资源-低产业型
279	252	山东省	日照市	日照市	日照市	莒县	浮来青四季滑雪场	夏庄镇平安路208号浮来青旅游度假区	待识别	待划分	城郊体验型	GaodeAPI_text(滑雪场)	118.668	35.3949	B0FFFDP8MP	日照市	低海拔人工造雪型	3	0	2.76247	0	0.464173	0.185669	Ⅱ 较低	25568900	221.9	308.36	1.73341	0.0474142	0.0665288	0.144073	0.203898	0.115479	0	0	Ⅳ类 低资源-低产业型
280	262	山东省	泰安市	泰安市	泰安市	泰山区	泰山方特滑雪场	省庄镇泰山区工业园明堂路8号泰安方特欢乐世界南停车场票务服务中心	待识别	待划分	城郊体验型	GaodeAPI_text(滑雪场)	117.196	36.2355	B0IKHSE7JH	泰安市	低海拔人工造雪型	3	0.0477273	2.76201	0.00447857	0.464188	0.188362	Ⅱ 较低	36221000	482.1	534.87	1.54469	0.0671671	0.14454	0.249904	0.180853	0.160616	0	1	Ⅲ类 低资源-高产业型
281	497	江苏省	徐州市	徐州市	徐州市	贾汪区	督公山滑雪乐园(暂停营业)	茱萸山街道督公湖风景区北侧	待识别	待划分	城郊体验型	GaodeAPI_text(滑雪基地)	117.562	34.4635	B02040UFKX	徐州市	低海拔人工造雪型	3	0.0295455	2.7562	0.00277245	0.464372	0.187412	Ⅱ 较低	95371200	323.59	902	1.31565	0.176853	0.0970168	0.421436	0.152885	0.212048	0	1	Ⅲ类 低资源-高产业型
282	663	河南省	洛阳市	洛阳市	洛阳市	洛龙区	洛阳奥斯陆滑雪场	南环线	待识别	待划分	城郊体验型	GaodeAPI_text(滑雪场)	112.552	34.5733	B0FFFQRBO1	洛阳市	低海拔人工造雪型	3	0	2.70337	0	0.466049	0.18642	Ⅱ 较低	58186000	795.4	707.9	0.913638	0.107898	0.238472	0.330748	0.103796	0.195229	0	1	Ⅲ类 低资源-高产业型
283	518	江苏省	连云港市	连云港市	连云港市	灌云县	伊芦山霞波滑雪场(暂停营业)	伊芦山风景区北侧	待识别	待划分	城郊体验型	GaodeAPI_text(滑雪场)	119.343	34.4459	B0FFINBP87	连云港市	低海拔人工造雪型	3	0.0113636	2.68717	0.00106633	0.466563	0.187265	Ⅱ 较低	46631300	587.93	459.4	2.28864	0.0864716	0.17627	0.214643	0.271697	0.18727	0	1	Ⅲ类 低资源-高产业型
284	665	河南省	济源市	济源市	济源市	济源市	乔凹滑雪场	[]	待识别	待划分	城郊体验型	GaodeAPI_text(滑雪场)	112.51	35.0376	B0J6PU45EO	济源市	低海拔人工造雪型	3	0	2.66312	0	0.467327	0.186931	Ⅱ 较低				1.18281				0.136664	0.136664	0	1	Ⅲ类 低资源-高产业型
285	302	山东省	潍坊市	潍坊市	潍坊市	安丘市	青云山滑雪场(暂停营业)	青云山路东首青云山民俗游乐园院内	待识别	待划分	城郊体验型	GaodeAPI_text(滑雪场)	119.248	36.4411	B021816YD3	潍坊市	低海拔人工造雪型	3	0.131818	2.65755	0.0123694	0.467503	0.194423	Ⅱ 较低	82032000	509	936.95	2.20289	0.152118	0.152605	0.437766	0.261226	0.250929	0	1	Ⅲ类 低资源-高产业型
286	610	河北省	衡水市	衡水市	衡水市	武邑县	清凉古镇滑雪场	清凉店镇	待识别	待划分	城郊体验型	GaodeAPI_text(滑雪场)	115.842	37.6833	B0FFK54M38	衡水市	低海拔人工造雪型	3	0.0818182	2.64997	0.00767754	0.467744	0.191704	Ⅱ 较低	19718000	107.73	415.76	2.46783	0.0365644	0.032299	0.194253	0.293577	0.139173	0	1	Ⅲ类 低资源-高产业型
287	868	陕西省	铜川市	铜川市	铜川市	耀州区	照金国际滑雪场	照金红色旅游名镇东侧	待识别	待划分	城郊体验型	GaodeAPI_text(滑雪场)	108.649	35.064	B0FFFRJAGR	铜川市	低海拔人工造雪型	3	0.184091	2.64954	0.0172745	0.467758	0.197468	Ⅱ 较低	5888200	52.6	70.49	0.648789	0.0109189	0.0157702	0.0329346	0.0714551	0.0327697	0	0	Ⅳ类 低资源-低产业型
288	310	山东省	烟台市	烟台市	烟台市	芝罘区	塔山滑雪场(暂停营业)	塔山路36号	待识别	待划分	城郊体验型	GaodeAPI_text(滑雪场)	121.401	37.5118	B02170RQUM	烟台市	低海拔人工造雪型	3	0	2.64496	0	0.467903	0.187161	Ⅱ 较低	107828300	624.4	703.22	2.95762	0.199953	0.187204	0.328561	0.353386	0.267276	0	1	Ⅲ类 低资源-高产业型
289	506	江苏省	无锡市	无锡市	无锡市	滨湖区	MEET SNOW雪遇城市滑雪俱乐部(海岸城店)	立信大道168号海岸城购物中心A座L4层	待识别	待划分	城市综合体室内雪场型	GaodeAPI_text(滑雪场)	120.304	31.4879	B0GRNLCW4V	无锡市	低海拔人工造雪型	3	0	2.62503	0	0.468536	0.187414	Ⅱ 较低	162632900	1057.89	749.5	3.91387	0.301581	0.31717	0.350185	0.470153	0.359772	0	1	Ⅲ类 低资源-高产业型
290	624	河北省	邯郸市	邯郸市	邯郸市	临漳县	邯郸鲲乐湾国际旅游度假区冰雪世界	邯郸鲲乐湾国际旅游度假区东侧380米	室内	待划分	城市综合体室内雪场型	GaodeAPI_text(滑雪度假区)	114.4	36.2903	B0KDVMS2Z1	邯郸市	低海拔人工造雪型	3	0	2.61603	0	0.468821	0.187528	Ⅱ 较低	47043000	420.43	917.31	2.17237	0.0872351	0.126051	0.428589	0.257499	0.224844	0	1	Ⅲ类 低资源-高产业型
291	364	山西省	晋城市	晋城市	晋城市	高平市	卧龙湾滑雪场(暂停营业)	养心湖北侧80米	待识别	待划分	城郊体验型	GaodeAPI_text(滑雪场)	113.037	35.8652	B0L6LCDB5T	晋城市	低海拔人工造雪型	3	0.190909	2.57736	0.0179143	0.470049	0.198768	Ⅱ 较低	24098000	293.45	217.18	0.792354	0.0446866	0.0879805	0.101472	0.0889857	0.0807811	0	0	Ⅳ类 低资源-低产业型
292	664	河南省	洛阳市	洛阳市	洛阳市	西工区	洛阳红山欢乐谷冰雪王国	嗨CAMPING闲聊露营地东侧120米	待识别	待划分	城市综合体室内雪场型	GaodeAPI_text(滑雪场)	112.315	34.7129	B0JRC18956	洛阳市	低海拔人工造雪型	3	0	2.50439	0	0.472365	0.188946	Ⅱ 较低	58186000	795.4	707.9	0.913638	0.107898	0.238472	0.330748	0.103796	0.195229	0	1	Ⅲ类 低资源-高产业型
293	655	河南省	洛阳市	洛阳市	洛阳市	伊川县	天室山滑雪场(暂停营业)	洛阳市天室山景区项目筹建处西侧	待识别	待划分	城郊体验型	GaodeAPI_text(滑雪场)	112.396	34.2442	B0FFJZXSTS	洛阳市	低海拔人工造雪型	3	0	2.5032	0	0.472403	0.188961	Ⅱ 较低	58186000	795.4	707.9	0.913638	0.107898	0.238472	0.330748	0.103796	0.195229	0	1	Ⅲ类 低资源-高产业型
294	374	山西省	运城市	运城市	运城市	永济市	永济市南山滑雪场(暂停营业)	舜帝山森林公园南山体育馆南侧500米	待识别	待划分	城郊体验型	GaodeAPI_text(滑雪场)	110.448	34.8411	B0FFKXEPY5	运城市	低海拔人工造雪型	3	0	2.48881	0	0.47286	0.189144	Ⅱ 较低	21906000	231.8	470.56	0.992662	0.0406218	0.0694969	0.219857	0.113445	0.110855	0	0	Ⅳ类 低资源-低产业型
295	234	山东省	临沂市	临沂市	临沂市	兰山区	临沂茶山滑雪场(暂停营业)	李官镇李官村向西200米	待识别	待划分	城郊体验型	GaodeAPI_text(滑雪场)	118.396	35.2835	B021B0XO5R	临沂市	低海拔人工造雪型	3	0.0340909	2.48347	0.00319898	0.473029	0.191131	Ⅱ 较低	65558000	475.6	1094.38	1.87332	0.121569	0.142592	0.511321	0.220982	0.249116	0	1	Ⅲ类 低资源-高产业型
296	844	陕西省	榆林市	榆林市	榆林市	榆阳区	红石峡生态公园滑雪场(暂停营业)	红石峡生态公园	待识别	待划分	城郊体验型	GaodeAPI_text(滑雪场)	109.72	38.3325	B039000S16	榆林市	低海拔人工造雪型	3	0	2.46843	0	0.473507	0.189403	Ⅱ 较低	75486800	103.37	360.73	0.440279	0.13998	0.0309918	0.168542	0.045994	0.096377	0	0	Ⅳ类 低资源-低产业型
297	511	江苏省	盐城市	盐城市	盐城市	盐都区	雪乐山滑雪(南金鹰店)	解放南路268号金鹰购物中心盐城聚龙湖店B1层	室内	待划分	城市综合体室内雪场型	GaodeAPI_text(滑雪场)	120.165	33.3403	B0J06MGFGE	盐城市	低海拔人工造雪型	3	0	2.45926	0	0.473798	0.189519	Ⅱ 较低	77791800	0	668.9	1.31236	0.144255	0	0.312526	0.152484	0.152316	0	1	Ⅲ类 低资源-高产业型
298	332	山西省	临汾市	临汾市	临汾市	洪洞县	米家沟滑雪场(暂停营业)	广胜寺镇封里村	待识别	待划分	城郊体验型	GaodeAPI_text(滑雪场)	111.754	36.2613	B0FFL6Y81I	临汾市	低海拔人工造雪型	3	0.0409091	2.43832	0.00383877	0.474462	0.192088	Ⅱ 较低	24387000	301.21	388.72	0.531624	0.0452225	0.090307	0.181619	0.0571481	0.0935743	0	0	Ⅳ类 低资源-低产业型
299	362	山西省	晋城市	晋城市	晋城市	泽州县	百花谷滑雪场	高都镇大兴村村西800米	待识别	待划分	城郊体验型	GaodeAPI_text(滑雪场)	113.03	35.578	B0KKC7N68E	晋城市	低海拔人工造雪型	3	0.190909	2.43682	0.0179143	0.47451	0.200553	Ⅱ 较低	24098000	293.45	217.18	0.792354	0.0446866	0.0879805	0.101472	0.0889857	0.0807811	0	0	Ⅳ类 低资源-低产业型
300	325	山东省	青岛市	青岛市	青岛市	崂山区	青岛北宅高山滑雪场(暂停营业)	华阳村七峪社区旁20米	待识别	待划分	体育赛事/训练型	GaodeAPI_text(滑雪场)	120.51	36.2136	B0FFGK85SO	青岛市	低海拔人工造雪型	3	0	2.42234	0	0.47497	0.189988	Ⅱ 较低	167194600	1019.3	1037.15	2.35537	0.31004	0.305601	0.484582	0.279845	0.345017	0	1	Ⅲ类 低资源-高产业型
301	190	四川省	阿坝藏族羌族自治州	阿坝藏族羌族自治州	阿坝藏族羌族自治州	松潘县	奇峡沟滑雪场	川主寺镇牧场村Z091	待识别	待划分	城市综合体室内雪场型	GaodeAPI_text(冰雪大世界)	103.54	32.9415	B0FFIPRGYO	阿坝藏族羌族自治州	低海拔人工造雪型	3	4.11364	2.41785	0.38601	0.475112	0.421651	Ⅴ 很高			82.5	0.192922			0.038546	0.0157894	0.0271677	1	0	Ⅱ类 高资源-低产业型
302	372	山西省	运城市	运城市	运城市	夏县	泗交国际滑雪场(暂停营业)	泗交镇东头泗交滑雪场	待识别	待划分	城郊体验型	GaodeAPI_text(滑雪场)	111.408	35.0894	B0FFF3O23K	运城市	低海拔人工造雪型	3	0	2.41669	0	0.475149	0.19006	Ⅱ 较低	21906000	231.8	470.56	0.992662	0.0406218	0.0694969	0.219857	0.113445	0.110855	0	0	Ⅳ类 低资源-低产业型
303	320	山东省	青岛市	青岛市	青岛市	即墨区	天泰温泉滑雪场	温泉旅游度假区附近	待识别	待划分	城郊体验型	GaodeAPI_text(滑雪场)	120.652	36.4296	B0FFFK31MJ	青岛市	低海拔人工造雪型	3	0	2.40582	0	0.475494	0.190198	Ⅱ 较低	167194600	1019.3	1037.15	2.35537	0.31004	0.305601	0.484582	0.279845	0.345017	0	1	Ⅲ类 低资源-高产业型
304	775	辽宁省	大连市	大连市	大连市	中山区	雪鹿森林劳动公园冰雪王国滑雪场	解放路5号劳动公园内大足球西侧	待识别	待划分	城市综合体室内雪场型	GaodeAPI_text(滑雪度假区)	121.633	38.9104	B0IAP7SQJL	大连市	低海拔人工造雪型	3	0	2.40046	0	0.475664	0.190266	Ⅱ 较低	95169000	610.3	753.9	1.4274	0.176478	0.182977	0.35224	0.166531	0.219557	0	1	Ⅲ类 低资源-高产业型
305	739	甘肃省	兰州市	兰州市	兰州市	榆中县	兰州银山七彩谷滑雪场	银山乡高家湾村	待识别	待划分	城郊体验型	GaodeAPI_text(滑雪场)	103.862	35.8359	B0FFITIHZ1	兰州市	低海拔人工造雪型	3	0.402273	2.38088	0.0377479	0.476286	0.213163	Ⅲ 中等	37423000	421.4	442.51	1.03271	0.069396	0.126342	0.206751	0.118335	0.130206	0	0	Ⅳ类 低资源-低产业型
306	333	山西省	临汾市	临汾市	临汾市	蒲县	西坡国际滑雪场	西坡村西戎故居西南300米	待识别	待划分	城郊体验型	GaodeAPI_text(滑雪场)	111.202	36.3543	B0K0JUDY9X	临汾市	低海拔人工造雪型	3	0.0409091	2.36495	0.00383877	0.476791	0.19302	Ⅱ 较低	24387000	301.21	388.72	0.531624	0.0452225	0.090307	0.181619	0.0571481	0.0935743	0	0	Ⅳ类 低资源-低产业型
307	213	宁夏回族自治区	中卫市	中卫市	中卫市	沙坡头区	沙坡头沙漠星空冰雪乐园	一叶星空帐篷营地西南侧360米	室内	待划分	城市综合体室内雪场型	GaodeAPI_text(冰雪乐园)	104.984	37.5299	B0L62DFKBO	中卫市	低海拔人工造雪型	3	0	2.34483	0	0.47743	0.190972	Ⅱ 较低	6002500	0	108.06	0.43524	0.0111308	0	0.0504882	0.0453787	0.0267495	0	0	Ⅳ类 低资源-低产业型
308	306	山东省	潍坊市	潍坊市	潍坊市	青州市	青州驼山滑雪度假村	王府观光大道	待识别	待划分	滑雪+度假综合型	GaodeAPI_text(滑雪场)	118.446	36.6689	B0FFGLLDEE	潍坊市	低海拔人工造雪型	3	0.131818	2.32596	0.0123694	0.478029	0.198633	Ⅱ 较低	82032000	509	936.95	2.20289	0.152118	0.152605	0.437766	0.261226	0.250929	0	1	Ⅲ类 低资源-高产业型
309	226	安徽省	六安市	六安市	六安市	霍山县	大别山滑雪旅游度假区(暂停开放)	漫水河镇新铺沟村扁担冲组	待识别	待划分	滑雪+度假综合型	GaodeAPI_text(滑雪度假区)	116.076	31.3071	B0J0US3844	六安市	低海拔人工造雪型	3	0	2.32435	0	0.47808	0.191232	Ⅱ 较低	23075000	290.35	434.3	0.769657	0.0427896	0.087051	0.202915	0.0862142	0.104743	0	0	Ⅳ类 低资源-低产业型
310	647	河南省	平顶山市	平顶山市	平顶山市	汝州市	汝州市龙凤山滑雪场(暂停营业)	大峪乡刘何村龙凤山	待识别	待划分	城郊体验型	GaodeAPI_text(滑雪场)	112.939	34.2645	B0FFFQTFWZ	平顶山市	低海拔人工造雪型	3	0	2.27563	0	0.479626	0.191851	Ⅱ 较低	28319700	0	492	0.913446	0.0525152	0	0.229874	0.103772	0.0965404	0	0	Ⅳ类 低资源-低产业型
311	672	河南省	焦作市	焦作市	焦作市	中站区	红砂岭云顶滑雪场(暂停营业)	影视城北2000米红砂岭	待识别	待划分	城郊体验型	GaodeAPI_text(滑雪场)	113.183	35.2881	B0FFFIGD1T	焦作市	低海拔人工造雪型	3	0	2.25937	0	0.480143	0.192057	Ⅱ 较低	23692000	175	352	2.64684	0.0439337	0.0524675	0.164463	0.315436	0.144075	0	1	Ⅲ类 低资源-高产业型
312	235	山东省	临沂市	临沂市	临沂市	兰山区	飞翔滑雪场	长春路与茶山路交汇北侧	待识别	待划分	城郊体验型	GaodeAPI_text(滑雪场)	118.326	35.1541	B0L67AO8FD	临沂市	低海拔人工造雪型	3	0.0340909	2.25555	0.00319898	0.480264	0.194025	Ⅱ 较低	65558000	475.6	1094.38	1.87332	0.121569	0.142592	0.511321	0.220982	0.249116	0	1	Ⅲ类 低资源-高产业型
313	742	甘肃省	兰州市	兰州市	兰州市	皋兰县	兰州龙山冰雪大世界(暂停开放)	什川镇雷神庙沟龙山滑雪场内	待识别	待划分	城市综合体室内雪场型	GaodeAPI_text(滑雪场)	104.003	36.1282	B0GRGKNIWW	兰州市	低海拔人工造雪型	3	0.402273	2.25236	0.0377479	0.480365	0.214795	Ⅲ 中等	37423000	421.4	442.51	1.03271	0.069396	0.126342	0.206751	0.118335	0.130206	0	0	Ⅳ类 低资源-低产业型
314	832	陕西省	宝鸡市	宝鸡市	宝鸡市	眉县	太白山森林公园滑雪场(暂停营业)	太白山国家森林公园(东北角)	待识别	待划分	城郊体验型	GaodeAPI_text(滑雪场)	107.902	34.0579	B0J6JH6U40	宝鸡市	低海拔人工造雪型	3	0.05	2.23807	0.00469183	0.480819	0.195143	Ⅱ 较低	0	484.89	0	0.780279	0	0.145377	0	0.0875113	0.058222	0	0	Ⅳ类 低资源-低产业型
315	634	河南省	三门峡市	三门峡市	三门峡市	湖滨区	欢乐壹号滑雪场	上官路与建工路交叉口东北角	待识别	待划分	城郊体验型	GaodeAPI_text(滑雪场)	111.192	34.7914	B0KK3SX917	三门峡市	低海拔人工造雪型	3	0.025	2.232	0.00234592	0.481011	0.193812	Ⅱ 较低	16186900	195.1	202	0.570534	0.0300165	0.0584937	0.0943793	0.0618994	0.0611972	0	0	Ⅳ类 低资源-低产业型
316	191	四川省	阿坝藏族羌族自治州	阿坝藏族羌族自治州	阿坝藏族羌族自治州	汶川县	汶川羌人谷国际滑雪康养度假区	[]	待识别	待划分	滑雪+度假综合型	GaodeAPI_text(滑雪度假区)	103.561	31.6474	B0L667M42X	阿坝藏族羌族自治州	低海拔人工造雪型	3	4.11364	2.22061	0.38601	0.481373	0.424155	Ⅴ 很高			82.5	0.192922			0.038546	0.0157894	0.0271677	1	0	Ⅱ类 高资源-低产业型
317	831	陕西省	宝鸡市	宝鸡市	宝鸡市	渭滨区	必捷滑雪场(暂停营业)	清姜路冯家塬	待识别	待划分	城郊体验型	GaodeAPI_text(滑雪场)	107.125	34.3298	B03950QG8K	宝鸡市	低海拔人工造雪型	3	0.05	2.16406	0.00469183	0.483168	0.196082	Ⅱ 较低	0	484.89	0	0.780279	0	0.145377	0	0.0875113	0.058222	0	0	Ⅳ类 低资源-低产业型
318	242	山东省	威海市	威海市	威海市	文登区	山泰生态园滑雪场	宋村镇下徐村山泰生态园	待识别	待划分	城郊体验型	GaodeAPI_text(滑雪场)	122.047	37.1051	B0FFFPL79O	威海市	低海拔人工造雪型	3	0	2.15238	0	0.483539	0.193415	Ⅱ 较低	37286200	393.1	291.36	1.60219	0.0691424	0.117857	0.13613	0.187875	0.127751	0	0	Ⅳ类 低资源-低产业型
319	15	上海市	上海市	上海市	上海市	静安区	BoxSpace体育盒子·健身·滑雪·桌球	中兴路1683号金融街购物中心B2-01室	待识别	待划分	城郊体验型	GaodeAPI_text(滑雪中心)	121.463	31.252	B0J2H9OONI	上海市	低海拔人工造雪型	3	0	2.14838	0	0.483666	0.193466	Ⅱ 较低	539267100	0		5.7535	1	0		0.694789	0.56493	0	1	Ⅲ类 低资源-高产业型
320	492	江苏省	南通市	南通市	南通市	崇川区	南通华航冰雪乐园	桃园路7号体育会展中心附10号	室内	待划分	城市综合体室内雪场型	GaodeAPI_text(滑雪中心)	120.898	31.9665	B0J0CUE0HG	南通市	低海拔人工造雪型	3	0	2.12499	0	0.484408	0.193763	Ⅱ 较低	124218900	0	774.9	2.78495	0.230348	0	0.362052	0.332301	0.231175	0	1	Ⅲ类 低资源-高产业型
321	303	山东省	潍坊市	潍坊市	潍坊市	潍城区	浮烟山冰雪谷(暂停营业)	望留街道潍坊天悦山庄西北96米	待识别	待划分	城郊体验型	GaodeAPI_text(滑雪场)	119.009	36.644	B0JKDAZ82W	潍坊市	低海拔人工造雪型	3	0.131818	2.11256	0.0123694	0.484803	0.201343	Ⅱ 较低	82032000	509	936.95	2.20289	0.152118	0.152605	0.437766	0.261226	0.250929	0	1	Ⅲ类 低资源-高产业型
322	261	山东省	泰安市	泰安市	泰安市	泰山区	泰山方特冰雪世界(暂停营业)	碧霞大街	室内	待划分	城市综合体室内雪场型	GaodeAPI_text(滑雪场)	117.194	36.2362	B0IKZZTV2Q	泰安市	低海拔人工造雪型	3	0.0477273	2.09981	0.00447857	0.485207	0.19677	Ⅱ 较低	36221000	482.1	534.87	1.54469	0.0671671	0.14454	0.249904	0.180853	0.160616	0	1	Ⅲ类 低资源-高产业型
323	715	湖北省	武汉市	武汉市	武汉市	武昌区	WS热雪奇迹	武珞路598号武商梦时代L8层A区	室内	待划分	城市综合体室内雪场型	GaodeAPI_text(滑雪场)	114.339	30.5287	B0I1O9EFIX	武汉市	低海拔人工造雪型	3	0	2.07089	0	0.486125	0.19445	Ⅱ 较低	211062300	2906.29	1377.4	2.85035	0.391387	0.871347	0.643555	0.340286	0.561644	0	1	Ⅲ类 低资源-高产业型
324	319	山东省	菏泽市	菏泽市	菏泽市	牡丹区	中国牡丹园滑雪场(暂停营业)	牡丹街道办事处327国道中国牡丹园内(西侧)	待识别	待划分	城郊体验型	GaodeAPI_text(滑雪场)	115.551	35.3091	B0FFKKCN44	菏泽市	低海拔人工造雪型	3	0	2.07001	0	0.486153	0.194461	Ⅱ 较低	48025800	124.2	863.55	1.26763	0.0890575	0.0372369	0.403471	0.147021	0.169197	0	1	Ⅲ类 低资源-高产业型
325	734	甘肃省	兰州市	兰州市	兰州市	城关区	奥赛冰雪室内滑雪馆	南滨河东路5002万达广场兰州南滨河店B1层	室内	待划分	城市综合体室内雪场型	GaodeAPI_text(雪世界)	103.867	36.0773	B0JRDYY45C	兰州市	低海拔人工造雪型	3	0.402273	2.04712	0.0377479	0.48688	0.217401	Ⅲ 中等	37423000	421.4	442.51	1.03271	0.069396	0.126342	0.206751	0.118335	0.130206	0	0	Ⅳ类 低资源-低产业型
326	863	陕西省	西安市	西安市	西安市	蓝田县	西安竹林畔滑雪场(暂停营业)	焦岱镇大洋峪村一组	待识别	待划分	城郊体验型	GaodeAPI_text(滑雪场)	109.259	34.0075	B0FFG7U8DQ	西安市	低海拔人工造雪型	3	0.00227273	2.03187	0.000213265	0.487364	0.195073	Ⅱ 较低	133177800	1882.42	1307.82	2.01536	0.246961	0.564376	0.611045	0.238326	0.415177	0	1	Ⅲ类 低资源-高产业型
327	680	河南省	郑州市	郑州市	郑州市	登封市	嵩山滑雪场	嵩山卢崖瀑布景区内	待识别	待划分	城郊体验型	GaodeAPI_text(滑雪场)	113.079	34.4798	B01730ITEM	郑州市	低海拔人工造雪型	3	0	2.01488	0	0.487903	0.195161	Ⅱ 较低	145321000	1401.1	1300.8	2.99446	0.269479	0.42007	0.607765	0.357884	0.413799	0	1	Ⅲ类 低资源-高产业型
328	679	河南省	郑州市	郑州市	郑州市	新郑市	龙泉国际滑雪场(暂停营业)	龙湖镇龙泉湿地公园内7号	待识别	待划分	城郊体验型	GaodeAPI_text(滑雪场)	113.603	34.577	B0FFGCURZD	郑州市	低海拔人工造雪型	3	0	1.98684	0	0.488793	0.195517	Ⅱ 较低	145321000	1401.1	1300.8	2.99446	0.269479	0.42007	0.607765	0.357884	0.413799	0	1	Ⅲ类 低资源-高产业型
329	625	河北省	邯郸市	邯郸市	邯郸市	广平县	广平冰雪大世界	广安东路与云溪大道南段交叉口东100米	待识别	待划分	城市综合体室内雪场型	GaodeAPI_text(冰雪世界)	114.965	36.474	B0L1BAYLL8	邯郸市	低海拔人工造雪型	3	0	1.96488	0	0.489491	0.195796	Ⅱ 较低	47043000	420.43	917.31	2.17237	0.0872351	0.126051	0.428589	0.257499	0.224844	0	1	Ⅲ类 低资源-高产业型
330	666	河南省	济源市	济源市	济源市	济源市	南山滑雪场水上世界(暂停营业)	克留线附近	待识别	待划分	城郊体验型	GaodeAPI_text(滑雪场)	112.504	35.0528	B0FFI8BMD6	济源市	低海拔人工造雪型	3	0	1.96484	0	0.489492	0.195797	Ⅱ 较低				1.18281				0.136664	0.136664	0	1	Ⅲ类 低资源-高产业型
331	777	辽宁省	大连市	大连市	大连市	金州区	铭湖国际温泉滑雪度假园区	炮台镇沈大高速公路炮台出口1公里	待识别	待划分	滑雪+度假综合型	GaodeAPI_text(滑雪度假区)	121.803	39.5036	B019B09CFI	大连市	低海拔人工造雪型	3	0	1.96172	0	0.489591	0.195836	Ⅱ 较低	95169000	610.3	753.9	1.4274	0.176478	0.182977	0.35224	0.166531	0.219557	0	1	Ⅲ类 低资源-高产业型
332	338	山西省	吕梁市	吕梁市	吕梁市	离石区	千年景区滑雪场(暂停开放)	信义镇千年里千年景区滑雪场	待识别	待划分	滑雪+度假综合型	GaodeAPI_text(滑雪场)	111.476	37.6426	B0FFHQXNJH	吕梁市	低海拔人工造雪型	3	0.422727	1.92475	0.0396673	0.490764	0.220106	Ⅲ 中等	26432400	232.84	334.65	0.428771	0.0490154	0.0698087	0.156357	0.0445888	0.0799424	0	0	Ⅳ类 低资源-低产业型
333	297	山东省	滨州市	滨州市	滨州市	滨城区	滨州领驰玉龙湖滑雪场	玉龙湖畔南400米	待识别	待划分	城郊体验型	GaodeAPI_text(滑雪场)	118.042	37.3616	B0I03SYZBU	滨州市	低海拔人工造雪型	3	0.0454545	1.92103	0.0042653	0.490882	0.198912	Ⅱ 较低	34047400	93	390.41	1.1048	0.0631364	0.0278827	0.182409	0.127139	0.100142	0	0	Ⅳ类 低资源-低产业型
334	246	山东省	威海市	威海市	威海市	环翠区	红松谷	初村镇恒山滑雪场	待识别	待划分	滑雪+度假综合型	GaodeAPI_text(滑雪场)	121.928	37.3994	B02770IJTS	威海市	低海拔人工造雪型	3	0	1.92005	0	0.490913	0.196365	Ⅱ 较低	37286200	393.1	291.36	1.60219	0.0691424	0.117857	0.13613	0.187875	0.127751	0	0	Ⅳ类 低资源-低产业型
335	519	江苏省	连云港市	连云港市	连云港市	赣榆区	塔山湖滑雪场(暂停营业)	塔山湖同乐园内(西侧)	待识别	待划分	城郊体验型	GaodeAPI_text(滑雪场)	118.955	34.9256	B0FFJYAG97	连云港市	低海拔人工造雪型	3	0.0113636	1.8876	0.00106633	0.491943	0.197417	Ⅱ 较低	46631300	587.93	459.4	2.28864	0.0864716	0.17627	0.214643	0.271697	0.18727	0	1	Ⅲ类 低资源-高产业型
336	291	山东省	淄博市	淄博市	淄博市	张店区	齐乐梦华玉黛湖滑雪场(暂停营业)	杏园街道湖田街道办事处309国道6公里处路北玉黛湖滑雪场内向西20米	待识别	待划分	城郊体验型	GaodeAPI_text(滑雪场)	118.143	36.8062	B0FFLJ772L	淄博市	低海拔人工造雪型	3	0.120455	1.88719	0.011303	0.491956	0.203564	Ⅱ 较低	48840800	406.2	467.4	1.46726	0.0905688	0.121784	0.218381	0.171398	0.150533	0	1	Ⅲ类 低资源-高产业型
337	322	山东省	青岛市	青岛市	青岛市	城阳区	体育小镇北岸滑雪场(暂停开放)	火炬路318号青岛市民健身中心	待识别	待划分	滑雪+度假综合型	GaodeAPI_text(滑雪场)	120.221	36.2285	B0HKTCF106	青岛市	低海拔人工造雪型	3	0	1.86722	0	0.49259	0.197036	Ⅱ 较低	167194600	1019.3	1037.15	2.35537	0.31004	0.305601	0.484582	0.279845	0.345017	0	1	Ⅲ类 低资源-高产业型
338	292	山东省	淄博市	淄博市	淄博市	沂源县	龙湾水乡冰雪乐园	007乡道	室内	待划分	城市综合体室内雪场型	GaodeAPI_text(滑雪场)	118.247	36.1563	B0JKPHT4IN	淄博市	低海拔人工造雪型	3	0.120455	1.84448	0.011303	0.493312	0.204107	Ⅱ 较低	48840800	406.2	467.4	1.46726	0.0905688	0.121784	0.218381	0.171398	0.150533	0	1	Ⅲ类 低资源-高产业型
339	284	山东省	济宁市	济宁市	济宁市	曲阜市	石门山滑雪场(暂停营业)	石门山镇梨园村西(石门山滑雪场)	待识别	待划分	城郊体验型	GaodeAPI_text(滑雪场)	117.087	35.7804	B0FFK6209T	济宁市	低海拔人工造雪型	3	0.00454545	1.84032	0.00042653	0.493444	0.197634	Ⅱ 较低	58675000	453.1	824.05	1.31227	0.108805	0.135846	0.385016	0.152472	0.195535	0	1	Ⅲ类 低资源-高产业型
340	14	上海市	上海市	上海市	上海市	青浦区	SKINOW雪乐山室内滑雪(天空万科广场店)	徐泾镇崧泽大道2229弄66号天空万科广场L302b	室内	待划分	城市综合体室内雪场型	GaodeAPI_text(滑雪小镇)	121.253	31.1768	B0KRYZ0W02	上海市	低海拔人工造雪型	3	0	1.83783	0	0.493523	0.197409	Ⅱ 较低	539267100	0		5.7535	1	0		0.694789	0.56493	0	1	Ⅲ类 低资源-高产业型
341	279	山东省	济南市	济南市	济南市	章丘区	金沙湾滑雪场(暂停营业)	埠村办事处沙湾村(济南植物园南行3公里)	待识别	待划分	城郊体验型	GaodeAPI_text(滑雪场)	117.48	36.5781	B0FFF4T796	济南市	低海拔人工造雪型	3	0.0954545	1.83547	0.00895713	0.493598	0.202814	Ⅱ 较低	135276000	702.8	943.7	2.22687	0.250852	0.210709	0.440919	0.264154	0.291659	0	1	Ⅲ类 低资源-高产业型
342	859	陕西省	西安市	西安市	西安市	新城区	西安银基冰雪世界	幸福北路与长缨东路交汇处路北	室内	待划分	城市综合体室内雪场型	GaodeAPI_text(冰雪世界)	109.015	34.279	B0IUOR96ZX	西安市	低海拔人工造雪型	3	0.00227273	1.82355	0.000213265	0.493977	0.197719	Ⅱ 较低	133177800	1882.42	1307.82	2.01536	0.246961	0.564376	0.611045	0.238326	0.415177	0	1	Ⅲ类 低资源-高产业型
343	743	甘肃省	兰州市	兰州市	兰州市	皋兰县	兰州龙山国际滑雪场	什川镇大奔头山开发区	待识别	待划分	城郊体验型	GaodeAPI_text(滑雪场)	103.983	36.1272	B0FFLCVW1D	兰州市	低海拔人工造雪型	3	0.402273	1.82012	0.0377479	0.494085	0.220283	Ⅲ 中等	37423000	421.4	442.51	1.03271	0.069396	0.126342	0.206751	0.118335	0.130206	0	0	Ⅳ类 低资源-低产业型
344	300	山东省	滨州市	滨州市	滨州市	阳信县	阳光田园小镇滑雪场(暂停营业)	七星小镇内	待识别	待划分	城郊体验型	GaodeAPI_text(滑雪场)	117.855	37.5962	B0FFIPGFYN	滨州市	低海拔人工造雪型	3	0.0454545	1.81457	0.0042653	0.494261	0.200264	Ⅱ 较低	34047400	93	390.41	1.1048	0.0631364	0.0278827	0.182409	0.127139	0.100142	0	0	Ⅳ类 低资源-低产业型
345	617	河北省	邢台市	邢台市	邢台市	南和区	嘉年华滑雪场(暂停营业)	贾宋镇s325与中兴东大街交叉口距南和农业嘉年华	待识别	待划分	城郊体验型	GaodeAPI_text(滑雪场)	114.719	37.0628	B0FFIRW8WF	邢台市	低海拔人工造雪型	3	0.00909091	1.79347	0.00085306	0.494931	0.198484	Ⅱ 较低	27659000	191.23	695.55	2.06729	0.05129	0.0573335	0.324978	0.244667	0.169567	0	1	Ⅲ类 低资源-高产业型
346	452	新疆维吾尔自治区	和田地区	和田地区	和田地区	墨玉县	墨玉舞伊纳克滑雪场(暂停营业)	墨玉县滑雪场南侧150米	待识别	待划分	城郊体验型	GaodeAPI_text(滑雪中心)	79.5788	37.1287	B0FFKB0BIW	和田地区	低海拔人工造雪型	3	0.0772727	1.76605	0.00725101	0.495802	0.202671	Ⅱ 较低			0	0.074398			0	0.00131646	0.000658231	0	0	Ⅳ类 低资源-低产业型
347	751	甘肃省	白银市	白银市	白银市	景泰县	白银国家雪上项目训练基地华达滑雪场	中泉乡白银国家雪上项目训练基地内	待识别	待划分	体育赛事/训练型	GaodeAPI_text(滑雪场)	104.113	36.792	B0IAHG3T6N	白银市	低海拔人工造雪型	3	0.143182	1.75836	0.0134357	0.496046	0.20648	Ⅱ 较低	7428700	64.7	148.81	0.562473	0.0137755	0.019398	0.0695276	0.0609151	0.0409041	0	0	Ⅳ类 低资源-低产业型
348	108	北京市	北京市	北京市	北京市	海淀区	五棵松雪世界	复兴路69号万事达中心南广场(乐视体育生态中心内)	室内	待划分	城市综合体室内雪场型	GaodeAPI_text(滑雪中心)	116.281	39.9087	B0FFFQM0FD	北京市	低海拔人工造雪型	3	0	1.75272	0	0.496225	0.19849	Ⅱ 较低	498431000	2914		4.08856	0.924275	0.873658		0.491484	0.763139	0	1	Ⅲ类 低资源-高产业型
349	586	河北省	沧州市	沧州市	沧州市	沧县	事竞成滑雪场(暂停营业)	十户疃村北600米	待识别	待划分	城郊体验型	GaodeAPI_text(滑雪场)	116.747	38.2245	B0FFHJOXRX	沧州市	低海拔人工造雪型	3	0.0204545	1.74996	0.00191939	0.496313	0.199677	Ⅱ 较低	47228000	118.78	726.46	2.12456	0.0875781	0.0356119	0.33942	0.25166	0.178568	0	1	Ⅲ类 低资源-高产业型
350	731	甘肃省	临夏回族自治州	临夏回族自治州	临夏回族自治州	永靖县	凤凰岭滑雪场	关山乡何家沟凤凰岭滑雪场	待识别	待划分	城郊体验型	GaodeAPI_text(滑雪场)	103.574	36.0166	B0FFHF2BKC	临夏回族自治州	低海拔人工造雪型	3	0.772727	1.74711	0.0725101	0.496403	0.242067	Ⅲ 中等			210.11	1.25903			0.0981685	0.145971	0.12207	1	0	Ⅱ类 高资源-低产业型
351	601	河北省	石家庄市	石家庄市	石家庄市	鹿泉区	东飞滑雪场(暂停营业)	上庄镇上庄工业区旺贝特服饰斜对面	待识别	待划分	城郊体验型	GaodeAPI_text(滑雪场)	114.384	38.0177	B0FFK6PVGH	石家庄市	低海拔人工造雪型	3	0.00681818	1.71948	0.000639795	0.49728	0.199296	Ⅱ 较低	82034000	684.2	1123.35	2.03768	0.152121	0.205133	0.524856	0.241052	0.280791	0	1	Ⅲ类 低资源-高产业型
352	860	陕西省	西安市	西安市	西安市	灞桥区	白鹿原滑雪场(暂停营业)	狄寨街办水安路86号	待识别	待划分	城郊体验型	GaodeAPI_text(滑雪场)	109.095	34.2165	B001D08OQ6	西安市	低海拔人工造雪型	3	0.00227273	1.71475	0.000213265	0.49743	0.1991	Ⅱ 较低	133177800	1882.42	1307.82	2.01536	0.246961	0.564376	0.611045	0.238326	0.415177	0	1	Ⅲ类 低资源-高产业型
353	493	江苏省	宿迁市	宿迁市	宿迁市	沭阳县	沭阳官墩山滑雪场(暂停营业)	官墩街88号桃花山庄	待识别	待划分	城郊体验型	GaodeAPI_text(滑雪场)	118.911	34.2041	B0FFFPIG7L	宿迁市	低海拔人工造雪型	3	0	1.70725	0	0.497668	0.199067	Ⅱ 较低	48018500	146.76	497.75	2.47558	0.089044	0.0440007	0.232561	0.294524	0.165032	0	1	Ⅲ类 低资源-高产业型
354	737	甘肃省	兰州市	兰州市	兰州市	安宁区	兰州安宁滑雪场	大青山北	待识别	待划分	滑雪+度假综合型	GaodeAPI_text(滑雪场)	103.724	36.1277	B03A30ZVJA	兰州市	低海拔人工造雪型	3	0.402273	1.69933	0.0377479	0.49792	0.221817	Ⅲ 中等	37423000	421.4	442.51	1.03271	0.069396	0.126342	0.206751	0.118335	0.130206	0	0	Ⅳ类 低资源-低产业型
355	628	河北省	邯郸市	邯郸市	邯郸市	永年区	洺湖西湖冰雪世界(暂停营业)	洺湖公园足球场西侧	室内	待划分	城市综合体室内雪场型	GaodeAPI_text(冰雪世界)	114.533	36.7627	B0KK0ZDOVE	邯郸市	低海拔人工造雪型	3	0	1.69178	0	0.498159	0.199264	Ⅱ 较低	47043000	420.43	917.31	2.17237	0.0872351	0.126051	0.428589	0.257499	0.224844	0	1	Ⅲ类 低资源-高产业型
356	301	山东省	潍坊市	潍坊市	潍坊市	临朐县	官护山滑雪场(暂停营业)	五井镇032县道阳城村东南910米官护山景区内(北侧)	待识别	待划分	城郊体验型	GaodeAPI_text(滑雪场)	118.4	36.4032	B0I0U75YLS	潍坊市	低海拔人工造雪型	3	0.131818	1.67982	0.0123694	0.498539	0.206837	Ⅱ 较低	82032000	509	936.95	2.20289	0.152118	0.152605	0.437766	0.261226	0.250929	0	1	Ⅲ类 低资源-高产业型
357	857	陕西省	渭南市	渭南市	渭南市	华阴市	华山国际滑雪场	孟塬路	待识别	待划分	城郊体验型	GaodeAPI_text(滑雪场)	110.131	34.5537	B0FFGB94XD	渭南市	低海拔人工造雪型	3	0.0363636	1.63071	0.00341224	0.500098	0.202086	Ⅱ 较低	21577300	352.06	0	0.835477	0.0400123	0.105553	0	0.0942515	0.0599541	0	0	Ⅳ类 低资源-低产业型
358	381	山西省	长治市	长治市	长治市	潞州区	神农滑雪场(暂停营业)	老顶山镇老顶山国家森林公园(西南角)	待识别	待划分	城郊体验型	GaodeAPI_text(滑雪场)	113.163	36.1899	B016300683	长治市	低海拔人工造雪型	3	0.284091	1.61953	0.0266581	0.500453	0.216176	Ⅲ 中等	25934000	271.22	312.66	0.786299	0.0480912	0.0813156	0.146082	0.0882464	0.0909339	0	0	Ⅳ类 低资源-低产业型
359	280	山东省	济南市	济南市	济南市	莱芜区	利和庄园冰雪乐园(暂停营业)	鹏泉街道高新区长安村5号	室内	待划分	城市综合体室内雪场型	GaodeAPI_text(滑雪场)	117.76	36.2421	B0FFLPFTC5	济南市	低海拔人工造雪型	3	0.0954545	1.60506	0.00895713	0.500912	0.205739	Ⅱ 较低	135276000	702.8	943.7	2.22687	0.250852	0.210709	0.440919	0.264154	0.291659	0	1	Ⅲ类 低资源-高产业型
360	232	山东省	东营市	东营市	东营市	东营区	龙居桃花岛滑雪场(暂停营业)	龙居镇黄河南坝头南二路西端向南2公里	待识别	待划分	城郊体验型	GaodeAPI_text(滑雪场)	118.235	37.3837	B02220OYY5	东营市	低海拔人工造雪型	3	0	1.56157	0	0.502292	0.200917	Ⅱ 较低	43077000	120.7	220.6	1.13672	0.0798806	0.0361876	0.10307	0.131036	0.0875434	0	0	Ⅳ类 低资源-低产业型
361	356	山西省	晋中市	晋中市	晋中市	榆次区	凤麒滑雪场	乌金山镇河口村凤麒庄园	待识别	待划分	城郊体验型	GaodeAPI_text(滑雪场)	112.694	37.7947	B01620N9AM	晋中市	低海拔人工造雪型	3	0.025	1.55601	0.00234592	0.502469	0.202395	Ⅱ 较低	24588000	407.9	337.65	0.682164	0.0455952	0.122294	0.157758	0.0755305	0.100295	0	0	Ⅳ类 低资源-低产业型
362	673	河南省	焦作市	焦作市	焦作市	修武县	当阳峪滑雪度假乐园(暂停营业)	西村乡当阳峪村圆融寺旁	待识别	待划分	城郊体验型	GaodeAPI_text(滑雪场)	113.244	35.2768	B01870NJKB	焦作市	低海拔人工造雪型	3	0	1.54643	0	0.502773	0.201109	Ⅱ 较低	23692000	175	352	2.64684	0.0439337	0.0524675	0.164463	0.315436	0.144075	0	1	Ⅲ类 低资源-高产业型
363	669	河南省	濮阳市	濮阳市	濮阳市	华龙区	濮上园天鹅湖滑雪场(暂停营业)	皇甫路街道中原西路与阳子路交叉口西400米	待识别	待划分	城郊体验型	GaodeAPI_text(滑雪场)	114.96	35.7843	B0FFFRGWBJ	濮阳市	低海拔人工造雪型	3	0.00681818	1.54427	0.000639795	0.502842	0.201521	Ⅱ 较低	20185500	35.5	370.1	3.18232	0.0374314	0.0106434	0.17292	0.380823	0.150454	0	1	Ⅲ类 低资源-高产业型
364	864	陕西省	西安市	西安市	西安市	长安区	翠华山滑雪场(暂停营业)	太乙宫镇翠华山	待识别	待划分	城郊体验型	GaodeAPI_text(滑雪场)	109.024	33.9685	B001D0VR2B	西安市	低海拔人工造雪型	3	0.00227273	1.54297	0.000213265	0.502883	0.201281	Ⅱ 较低	133177800	1882.42	1307.82	2.01536	0.246961	0.564376	0.611045	0.238326	0.415177	0	1	Ⅲ类 低资源-高产业型
365	324	山东省	青岛市	青岛市	青岛市	崂山区	瑞吉山国际滑雪俱乐部	银川东路3号国信体育场M区1层(6号电梯旁)	待识别	待划分	城郊体验型	GaodeAPI_text(滑雪场)	120.446	36.1034	B0J15USHZH	青岛市	低海拔人工造雪型	3	0	1.52303	0	0.503516	0.201406	Ⅱ 较低	167194600	1019.3	1037.15	2.35537	0.31004	0.305601	0.484582	0.279845	0.345017	0	1	Ⅲ类 低资源-高产业型
366	334	山西省	临汾市	临汾市	临汾市	襄汾县	东岭生态滑雪场(暂停营业)	新城镇安建村内,东岭森林公园往东三公里处	待识别	待划分	城郊体验型	GaodeAPI_text(滑雪场)	111.478	35.8962	B01650WWXJ	临汾市	低海拔人工造雪型	3	0.0409091	1.48682	0.00383877	0.504665	0.204169	Ⅱ 较低	24387000	301.21	388.72	0.531624	0.0452225	0.090307	0.181619	0.0571481	0.0935743	0	0	Ⅳ类 低资源-低产业型
367	641	河南省	南阳市	南阳市	南阳市	西峡县	老界岭滑雪场(暂停营业)	太平镇(近世界地质公园伏牛山)	待识别	待划分	城郊体验型	GaodeAPI_text(滑雪场)	111.69	33.6272	B0179023MY	南阳市	低海拔人工造雪型	3	0	1.48382	0	0.50476	0.201904	Ⅱ 较低	48790800	227.12	949.7	0.759692	0.0904761	0.0680938	0.443723	0.0849974	0.171823	0	1	Ⅲ类 低资源-高产业型
368	509	江苏省	淮安市	淮安市	淮安市	盱眙县	盱眙铁山寺滑雪场(暂停营业)	天泉湖镇陡山村	待识别	待划分	城郊体验型	GaodeAPI_text(滑雪场)	118.519	32.7617	B0FFHKJK90	淮安市	低海拔人工造雪型	3	0	1.47255	0	0.505118	0.202047	Ⅱ 较低	54130200	266.87	453.8	1.07703	0.100377	0.0800114	0.212026	0.123747	0.12904	0	0	Ⅳ类 低资源-低产业型
369	626	河北省	邯郸市	邯郸市	邯郸市	广平县	赵王滑雪场	广平镇湖西街与宇康路交叉口东北240米	待识别	待划分	滑雪+度假综合型	GaodeAPI_text(滑雪场)	114.96	36.4687	B0FFKYTT0D	邯郸市	低海拔人工造雪型	3	0	1.4553	0	0.505666	0.202266	Ⅱ 较低	47043000	420.43	917.31	2.17237	0.0872351	0.126051	0.428589	0.257499	0.224844	0	1	Ⅲ类 低资源-高产业型
370	846	陕西省	榆林市	榆林市	榆林市	横山区	杨官海则滑雪场	崇德路街道办事处科创新城供水公司向北500米	待识别	待划分	城郊体验型	GaodeAPI_text(滑雪场)	109.667	38.1992	B0L66AK39B	榆林市	低海拔人工造雪型	3	0	1.45334	0	0.505728	0.202291	Ⅱ 较低	75486800	103.37	360.73	0.440279	0.13998	0.0309918	0.168542	0.045994	0.096377	0	0	Ⅳ类 低资源-低产业型
371	632	河南省	三门峡市	三门峡市	三门峡市	渑池县	柳庄观光园-滑雪场	洪阳镇柳庄村	待识别	待划分	滑雪+度假综合型	GaodeAPI_text(滑雪场)	111.998	34.8041	B0FFKVBX7L	三门峡市	低海拔人工造雪型	3	0.025	1.44993	0.00234592	0.505836	0.203742	Ⅱ 较低	16186900	195.1	202	0.570534	0.0300165	0.0584937	0.0943793	0.0618994	0.0611972	0	0	Ⅳ类 低资源-低产业型
372	298	山东省	滨州市	滨州市	滨州市	邹平市	蝴蝶谷嬉雪园(暂停营业)	醴泉五路南首蝴蝶欢乐谷景区内	待识别	待划分	城郊体验型	GaodeAPI_text(滑雪场)	117.752	36.7829	B0FFHQTBAZ	滨州市	低海拔人工造雪型	3	0.0454545	1.44508	0.0042653	0.50599	0.204955	Ⅱ 较低	34047400	93	390.41	1.1048	0.0631364	0.0278827	0.182409	0.127139	0.100142	0	0	Ⅳ类 低资源-低产业型
373	644	河南省	安阳市	安阳市	安阳市	林州市	林州太行风情滑雪场(暂停营业)	姚村镇观光大道太行春天酒店入口处	待识别	待划分	城郊体验型	GaodeAPI_text(滑雪场)	113.768	36.1546	B0FFFNLZ9Y	安阳市	低海拔人工造雪型	3	0.0295455	1.43058	0.00277245	0.506451	0.204244	Ⅱ 较低	26720600	361.23	537.6	2.21085	0.0495498	0.108302	0.25118	0.262197	0.167807	0	1	Ⅲ类 低资源-高产业型
374	856	陕西省	渭南市	渭南市	渭南市	华阴市	华山冰雪世界	华岳大道华山清心温泉酒店北侧约250米	室内	待划分	城市综合体室内雪场型	GaodeAPI_text(雪世界)	110.097	34.5457	B0HR9R9WRV	渭南市	低海拔人工造雪型	3	0.0363636	1.42429	0.00341224	0.50665	0.204707	Ⅱ 较低	21577300	352.06	0	0.835477	0.0400123	0.105553	0	0.0942515	0.0599541	0	0	Ⅳ类 低资源-低产业型
375	651	河南省	新乡市	新乡市	新乡市	辉县市	凤凰山滑雪场(暂停营业)	常村镇东山凤凰山滑雪场	待识别	待划分	城郊体验型	GaodeAPI_text(滑雪场)	113.881	35.4841	B0J6GMH08S	新乡市	低海拔人工造雪型	3	0.00681818	1.38247	0.000639795	0.507977	0.203575	Ⅱ 较低	35697000	222.31	612.5	2.56387	0.0661954	0.0666517	0.286175	0.305305	0.181082	0	1	Ⅲ类 低资源-高产业型
376	733	甘肃省	兰州市	兰州市	兰州市	城关区	九州冰雪嘉年华	903号路387号	待识别	待划分	城市综合体室内雪场型	GaodeAPI_text(冰雪世界)	103.807	36.0926	B0K0O7NUAK	兰州市	低海拔人工造雪型	3	0.402273	1.37535	0.0377479	0.508204	0.22593	Ⅲ 中等	37423000	421.4	442.51	1.03271	0.069396	0.126342	0.206751	0.118335	0.130206	0	0	Ⅳ类 低资源-低产业型
377	307	山东省	烟台市	烟台市	烟台市	招远市	招远市罗山必捷滑雪场(暂停营业)	玲珑镇招金舜和国际饭店西南侧	待识别	待划分	城郊体验型	GaodeAPI_text(滑雪场)	120.472	37.4481	B0FFGFZOSQ	烟台市	低海拔人工造雪型	3	0	1.36646	0	0.508486	0.203394	Ⅱ 较低	107828300	624.4	703.22	2.95762	0.199953	0.187204	0.328561	0.353386	0.267276	0	1	Ⅲ类 低资源-高产业型
378	312	山东省	烟台市	烟台市	烟台市	莱山区	高顶滑雪场(暂停营业)	院格庄中学南170米院内1号办公楼	待识别	待划分	城郊体验型	GaodeAPI_text(滑雪场)	121.369	37.3045	B0J0Z74VH4	烟台市	低海拔人工造雪型	3	0	1.36621	0	0.508494	0.203397	Ⅱ 较低	107828300	624.4	703.22	2.95762	0.199953	0.187204	0.328561	0.353386	0.267276	0	1	Ⅲ类 低资源-高产业型
379	521	江苏省	连云港市	连云港市	连云港市	赣榆区	赣榆潜园滑雪场	青口镇城南乡盐殷线	待识别	待划分	滑雪+度假综合型	GaodeAPI_text(滑雪场)	119.085	34.7916	B0JKDZXQMT	连云港市	低海拔人工造雪型	3	0.0113636	1.32988	0.00106633	0.509647	0.204499	Ⅱ 较低	46631300	587.93	459.4	2.28864	0.0864716	0.17627	0.214643	0.271697	0.18727	0	1	Ⅲ类 低资源-高产业型
380	568	河北省	张家口市	张家口市	张家口市	崇礼区	多乐美地滑雪场(暂停营业)	四台嘴乡喜鹊梁北侧	待识别	待划分	城郊体验型	GaodeAPI_text(滑雪场)	115.382	40.8341	B013901R41	张家口市	低海拔人工造雪型	3	0.752273	1.31676	0.0705907	0.510063	0.24638	Ⅳ 较高	19133000	213.58	405.01	1.00065	0.0354796	0.0640343	0.18923	0.11442	0.100791	1	0	Ⅱ类 高资源-低产业型
381	500	江苏省	徐州市	徐州市	徐州市	铜山区	徐州纳帕溪谷滑雪场(暂停营业)	汉王镇三华山,拔剑泉往西500米	待识别	待划分	城郊体验型	GaodeAPI_text(滑雪场)	117.066	34.1876	B0FFFPJEQW	徐州市	低海拔人工造雪型	3	0.0295455	1.29231	0.00277245	0.51084	0.205999	Ⅱ 较低	95371200	323.59	902	1.31565	0.176853	0.0970168	0.421436	0.152885	0.212048	0	1	Ⅲ类 低资源-高产业型
382	212	宁夏回族自治区	中卫市	中卫市	中卫市	中宁县	中宁县奥体冰雪乐园	新堡西街7号新胜村2队(南二环转盘向西500米南侧)	室内	待划分	城市综合体室内雪场型	GaodeAPI_text(冰雪乐园)	105.675	37.4588	B0K0Z9ZMTS	中卫市	低海拔人工造雪型	3	0	1.27806	0	0.511292	0.204517	Ⅱ 较低	6002500	0	108.06	0.43524	0.0111308	0	0.0504882	0.0453787	0.0267495	0	0	Ⅳ类 低资源-低产业型
383	936	甘肃省	酒泉市	酒泉市		肃州区	酒泉天宝景区滑雪场		户外		滑雪+度假综合型	手工补录：锡林浩特市正达滑雪场.docx	98.5044	39.7317		酒泉市	低海拔人工造雪型	3	0	1.26712	0	0.511639	0.204656	Ⅱ 较低										0	0	Ⅳ类 低资源-低产业型
384	272	山东省	济南市	济南市	济南市	历城区	金象山滑雪场(暂停营业)	锦绣川乡商家金象山风景区内	待识别	待划分	城郊体验型	GaodeAPI_text(滑雪场)	117.116	36.4737	B02130ZI5Z	济南市	低海拔人工造雪型	3	0.0954545	1.26463	0.00895713	0.511718	0.210062	Ⅲ 中等	135276000	702.8	943.7	2.22687	0.250852	0.210709	0.440919	0.264154	0.291659	0	1	Ⅲ类 低资源-高产业型
385	361	山西省	晋城市	晋城市	晋城市	城区	白马寺国际滑雪场(暂停营业)	[]	待识别	待划分	城郊体验型	GaodeAPI_text(滑雪场)	112.862	35.5539	B0IKJU5FAH	晋城市	低海拔人工造雪型	3	0.190909	1.23524	0.0179143	0.512651	0.215809	Ⅲ 中等	24098000	293.45	217.18	0.792354	0.0446866	0.0879805	0.101472	0.0889857	0.0807811	0	0	Ⅳ类 低资源-低产业型
386	84	北京市	北京市	北京市	北京市	房山区	北京皇元井四季乐园	长沟镇黄元井村	待识别	待划分	城郊体验型	GaodeAPI_text(冰雪乐园)	115.857	39.5869	B0LBAZ7XTT	北京市	低海拔人工造雪型	3	0	1.21935	0	0.513155	0.205262	Ⅱ 较低	498431000	2914		4.08856	0.924275	0.873658		0.491484	0.763139	0	1	Ⅲ类 低资源-高产业型
387	545	河北省	保定市	保定市	保定市	蠡县	蠡县东乐滑雪场	蠡县湿地公园北漳滑雪场	待识别	待划分	城郊体验型	GaodeAPI_text(滑雪场)	115.611	38.5183	B0KBNCIB3P	保定市	低海拔人工造雪型	3	0.00454545	1.21645	0.00042653	0.513247	0.205555	Ⅱ 较低	47733000	684.19	909.89	1.29013	0.0885146	0.20513	0.425123	0.149769	0.217134	0	1	Ⅲ类 低资源-高产业型
388	245	山东省	威海市	威海市	威海市	环翠区	威虎山滑雪场(暂停营业)	嵩山街道办事处闫家庄村南山	待识别	待划分	城郊体验型	GaodeAPI_text(滑雪场)	122.115	37.3849	B0IBX7OD4T	威海市	低海拔人工造雪型	3	0	1.21123	0	0.513413	0.205365	Ⅱ 较低	37286200	393.1	291.36	1.60219	0.0691424	0.117857	0.13613	0.187875	0.127751	0	0	Ⅳ类 低资源-低产业型
389	609	河北省	衡水市	衡水市	衡水市	安平县	安平国际会展中心滑雪场冰雪大世界	正港路59号会展中心南停车广场	待识别	待划分	城市综合体室内雪场型	GaodeAPI_text(滑雪场)	115.596	38.2329	B0I6TSNA18	衡水市	低海拔人工造雪型	3	0.0818182	1.19426	0.00767754	0.513952	0.210187	Ⅲ 中等	19718000	107.73	415.76	2.46783	0.0365644	0.032299	0.194253	0.293577	0.139173	0	1	Ⅲ类 低资源-高产业型
390	73	北京市	北京市	北京市	北京市	大兴区	雪乐山室内滑雪(北京荟聚购物中心)	欣宁街15号的北京荟聚中心2层童乐荟02G11号	室内	待划分	城市综合体室内雪场型	GaodeAPI_text(滑雪小镇)	116.327	39.7858	B0KD6UJ6HK	北京市	低海拔人工造雪型	3	0	1.16453	0	0.514895	0.205958	Ⅱ 较低	498431000	2914		4.08856	0.924275	0.873658		0.491484	0.763139	0	1	Ⅲ类 低资源-高产业型
391	668	河南省	济源市	济源市	济源市	济源市	花石滑雪场	金花石水上乐园西侧	待识别	待划分	城郊体验型	GaodeAPI_text(滑雪场)	112.506	35.0528	B0L6LRGKTI	济源市	低海拔人工造雪型	3	0	1.15983	0	0.515045	0.206018	Ⅱ 较低				1.18281				0.136664	0.136664	0	1	Ⅲ类 低资源-高产业型
392	595	河北省	石家庄市	石家庄市	石家庄市	平山县	西柏坡温泉滑雪场(暂停营业)	温塘镇北马冢村西北	待识别	待划分	城郊体验型	GaodeAPI_text(滑雪场)	113.978	38.2133	B01370UHC0	石家庄市	低海拔人工造雪型	3	0.00681818	1.13297	0.000639795	0.515897	0.206743	Ⅱ 较低	82034000	684.2	1123.35	2.03768	0.152121	0.205133	0.524856	0.241052	0.280791	0	1	Ⅲ类 低资源-高产业型
393	282	山东省	济南市	济南市	济南市	长清区	长清园博园滑雪场(南湖)(暂停营业)	崮云湖街道园博园南湖南岸1-2号	待识别	待划分	城郊体验型	GaodeAPI_text(滑雪场)	116.811	36.5258	B0FFLOPU8K	济南市	低海拔人工造雪型	3	0.0954545	1.09688	0.00895713	0.517043	0.212191	Ⅲ 中等	135276000	702.8	943.7	2.22687	0.250852	0.210709	0.440919	0.264154	0.291659	0	1	Ⅲ类 低资源-高产业型
394	283	山东省	济宁市	济宁市	济宁市	曲阜市	尼山滑雪场(暂停营业)	尼山镇尼山耕读书院东188米	待识别	待划分	城郊体验型	GaodeAPI_text(滑雪场)	117.211	35.5037	B0J0GDACWU	济宁市	低海拔人工造雪型	3	0.00454545	1.08608	0.00042653	0.517386	0.20721	Ⅱ 较低	58675000	453.1	824.05	1.31227	0.108805	0.135846	0.385016	0.152472	0.195535	0	1	Ⅲ类 低资源-高产业型
395	874	青海省	西宁市	西宁市	西宁市	大通回族土族自治县	鹞子沟康乐滑雪场	东峡镇鹞子沟	待识别	待划分	城郊体验型	GaodeAPI_text(滑雪场)	101.822	37.0329	B03CB10FVY	西宁市	低海拔人工造雪型	3	1.14773	1.08273	0.107699	0.517492	0.271616	Ⅳ 较高	18621000	219.71	248.1	0.614105	0.0345302	0.0658722	0.115918	0.0672198	0.0708851	1	0	Ⅱ类 高资源-低产业型
396	749	甘肃省	甘南藏族自治州	甘南藏族自治州	甘南藏族自治州	临潭县	天池冶海·冰雪乐园	冶力关镇冶力关旅游区天池冶海片区内(南侧)	室内	待划分	城市综合体室内雪场型	GaodeAPI_text(冰雪乐园)	103.634	35.0034	B0L6AA04BA	甘南藏族自治州	低海拔人工造雪型	3	0.793182	1.04739	0.0744295	0.518614	0.252103	Ⅳ 较高			66.87	0.218914			0.0312433	0.0189632	0.0251033	1	0	Ⅱ类 高资源-低产业型
397	652	河南省	新乡市	新乡市	新乡市	辉县市	天柱沟大峡谷滑雪场	南寨镇	待识别	待划分	城郊体验型	GaodeAPI_text(滑雪场)	113.623	35.8226	B0FFHNDJSP	新乡市	低海拔人工造雪型	3	0.00681818	1.03069	0.000639795	0.519144	0.208041	Ⅲ 中等	35697000	222.31	612.5	2.56387	0.0661954	0.0666517	0.286175	0.305305	0.181082	0	1	Ⅲ类 低资源-高产业型
398	667	河南省	济源市	济源市	济源市	济源市	王屋山滑雪场(暂停营业)	王屋镇汤洼村河对岸	待识别	待划分	城郊体验型	GaodeAPI_text(滑雪场)	112.318	35.1591	B0FFFKCTDV	济源市	低海拔人工造雪型	3	0	1.01268	0	0.519716	0.207886	Ⅲ 中等				1.18281				0.136664	0.136664	0	1	Ⅲ类 低资源-高产业型
399	732	甘肃省	兰州市	兰州市	兰州市	七里河区	兰州老街冰雪嘉年华	西津西路614号	待识别	待划分	城市综合体室内雪场型	GaodeAPI_text(冰雪世界)	103.73	36.076	B0K0OCNU3L	兰州市	低海拔人工造雪型	3	0.402273	0.985152	0.0377479	0.520589	0.230885	Ⅲ 中等	37423000	421.4	442.51	1.03271	0.069396	0.126342	0.206751	0.118335	0.130206	1	0	Ⅱ类 高资源-低产业型
400	365	山西省	朔州市	朔州市	朔州市	右玉县	右玉南山滑雪场(暂停营业)	西山西	待识别	待划分	城郊体验型	GaodeAPI_text(滑雪场)	112.529	39.98	B015D0MGUI	朔州市	低海拔人工造雪型	3	0.254545	0.98308	0.0238857	0.520655	0.222593	Ⅲ 中等	13285000	0	157.9	0.648392	0.0246353	0	0.0737747	0.0714066	0.0424541	0	0	Ⅳ类 低资源-低产业型
401	619	河北省	邢台市	邢台市	邢台市	巨鹿县	巨鹿县金玉滑雪场(暂停营业)	堤村乡金玉滑雪场	待识别	待划分	城郊体验型	GaodeAPI_text(滑雪场)	115.043	37.1765	B0H6KDDG6T	邢台市	低海拔人工造雪型	3	0.00909091	0.944581	0.00085306	0.521877	0.209263	Ⅲ 中等	27659000	191.23	695.55	2.06729	0.05129	0.0573335	0.324978	0.244667	0.169567	0	1	Ⅲ类 低资源-高产业型
402	866	陕西省	铜川市	铜川市	铜川市	印台区	玉华宫松林滑雪场(暂停营业)	玉华镇玉华宫景区内	待识别	待划分	城郊体验型	GaodeAPI_text(滑雪场)	108.908	35.3243	B03970LUH3	铜川市	低海拔人工造雪型	3	0.184091	0.910169	0.0172745	0.52297	0.219552	Ⅲ 中等	5888200	52.6	70.49	0.648789	0.0109189	0.0157702	0.0329346	0.0714551	0.0327697	0	0	Ⅳ类 低资源-低产业型
403	249	山东省	日照市	日照市	日照市	东港区	沁园春风景区滑雪场(暂停营业)	河山镇费家官庄村村西	待识别	待划分	滑雪+度假综合型	GaodeAPI_text(滑雪场)	119.488	35.5087	B0FFFHASDX	日照市	低海拔人工造雪型	3	0	0.90243	0	0.523215	0.209286	Ⅲ 中等	25568900	221.9	308.36	1.73341	0.0474142	0.0665288	0.144073	0.203898	0.115479	0	0	Ⅳ类 低资源-低产业型
404	233	山东省	临沂市	临沂市	临沂市	临沭县	夹谷山滑雪场(暂停营业)	班庄镇夹山夹谷山景区售票处西门东边	待识别	待划分	城郊体验型	GaodeAPI_text(滑雪场)	118.856	34.9288	B0FFHK9T0F	临沂市	低海拔人工造雪型	3	0.0340909	0.901954	0.00319898	0.52323	0.211211	Ⅲ 中等	65558000	475.6	1094.38	1.87332	0.121569	0.142592	0.511321	0.220982	0.249116	0	1	Ⅲ类 低资源-高产业型
405	373	山西省	运城市	运城市	运城市	永济市	五老峰国际滑雪场(暂停营业)	虞乡镇Y012五老峰景区	待识别	待划分	城郊体验型	GaodeAPI_text(滑雪场)	110.6	34.8382	B0FFFPCW7E	运城市	低海拔人工造雪型	3	0	0.896343	0	0.523408	0.209363	Ⅲ 中等	21906000	231.8	470.56	0.992662	0.0406218	0.0694969	0.219857	0.113445	0.110855	0	0	Ⅳ类 低资源-低产业型
406	323	山东省	青岛市	青岛市	青岛市	城阳区	山野冰雪世纪游乐园	铁骑山路26号山野里度假公园内部	待识别	待划分	滑雪+度假综合型	GaodeAPI_text(滑雪度假区)	120.519	36.3052	B0KK95GJJM	青岛市	低海拔人工造雪型	3	0	0.891103	0	0.523575	0.20943	Ⅲ 中等	167194600	1019.3	1037.15	2.35537	0.31004	0.305601	0.484582	0.279845	0.345017	0	1	Ⅲ类 低资源-高产业型
407	236	山东省	临沂市	临沂市	临沂市	河东区	冰雪部落	九曲街道智诚路	待识别	待划分	滑雪+度假综合型	GaodeAPI_text(滑雪场)	118.406	35.1325	B0JKCUMSM6	临沂市	低海拔人工造雪型	3	0.0340909	0.880174	0.00319898	0.523922	0.211488	Ⅲ 中等	65558000	475.6	1094.38	1.87332	0.121569	0.142592	0.511321	0.220982	0.249116	0	1	Ⅲ类 低资源-高产业型
408	67	北京市	北京市	北京市	北京市	大兴区	东辛屯冰雪大世界(暂停营业)	东辛屯村村北50米路西	待识别	待划分	城市综合体室内雪场型	GaodeAPI_text(滑雪场)	116.522	39.6978	B0FFGG0HAR	北京市	低海拔人工造雪型	3	0	0.878435	0	0.523977	0.209591	Ⅲ 中等	498431000	2914		4.08856	0.924275	0.873658		0.491484	0.763139	0	1	Ⅲ类 低资源-高产业型
409	550	河北省	唐山市	唐山市	唐山市	玉田县	玉龙湾滑雪度假村(暂停营业)	唐自头镇杨家团城村	待识别	待划分	滑雪+度假综合型	GaodeAPI_text(滑雪场)	117.606	39.9488	B0FFIQCKZ3	唐山市	低海拔人工造雪型	3	0	0.828184	0	0.525572	0.210229	Ⅲ 中等	100039000	446.97	771.95	1.98314	0.185509	0.134008	0.360674	0.234392	0.228646	0	1	Ⅲ类 低资源-高产业型
410	277	山东省	济南市	济南市	济南市	章丘区	三涧溪滑雪场	双山街道双山街道三涧溪中兴街888号	待识别	待划分	城郊体验型	GaodeAPI_text(滑雪场)	117.58	36.6983	B0J0YCP77C	济南市	低海拔人工造雪型	3	0.0954545	0.825979	0.00895713	0.525642	0.215631	Ⅲ 中等	135276000	702.8	943.7	2.22687	0.250852	0.210709	0.440919	0.264154	0.291659	0	1	Ⅲ类 低资源-高产业型
411	205	天津市	天津市	天津市	天津市	河东区	世诺唯滑雪运动空间	大直沽西路辅路乐动力河东体育中心(民生银行对面)	待识别	待划分	城郊体验型	GaodeAPI_text(滑雪场)	117.239	39.1134	B0KDSZV49C	天津市	低海拔人工造雪型	3	0	0.787829	0	0.526853	0.210741	Ⅲ 中等	180243200	0		2.77744	0.334237	0		0.331384	0.221874	0	1	Ⅲ类 低资源-高产业型
412	682	河南省	郑州市	郑州市	郑州市	荥阳市	桃花峪滑雪场(暂停营业)	广武镇桃花峪风景区	待识别	待划分	城郊体验型	GaodeAPI_text(滑雪场)	113.489	34.9536	B0FFFVTS8B	郑州市	低海拔人工造雪型	3	0	0.785222	0	0.526936	0.210774	Ⅲ 中等	145321000	1401.1	1300.8	2.99446	0.269479	0.42007	0.607765	0.357884	0.413799	0	1	Ⅲ类 低资源-高产业型
413	559	河北省	廊坊市	廊坊市	廊坊市	安次区	东储温泉滑雪场	东储村西北角	待识别	待划分	城郊体验型	GaodeAPI_text(滑雪场)	116.724	39.4057	B0FFFAF5HL	廊坊市	低海拔人工造雪型	3	0	0.758568	0	0.527782	0.211113	Ⅲ 中等	39046000	207.19	547.8	2.36175	0.0724057	0.0621185	0.255945	0.280624	0.167773	0	1	Ⅲ类 低资源-高产业型
414	646	河南省	平顶山市	平顶山市	平顶山市	宝丰县	香山滑雪场	大香山路	待识别	待划分	城郊体验型	GaodeAPI_text(滑雪场)	113.203	33.8164	B0FFG6H6B1	平顶山市	低海拔人工造雪型	3	0	0.751416	0	0.528009	0.211203	Ⅲ 中等	28319700	0	492	0.913446	0.0525152	0	0.229874	0.103772	0.0965404	0	0	Ⅳ类 低资源-低产业型
415	217	宁夏回族自治区	银川市	银川市	银川市	兴庆区	北塔湖梦幻冰雪世界(暂停营业)	北塔南湖	室内	待划分	城市综合体室内雪场型	GaodeAPI_text(雪世界)	106.278	38.4849	B0L6GCFMOS	银川市	低海拔人工造雪型	3	0	0.751248	0	0.528014	0.211206	Ⅲ 中等	29395300	0	290.81	1.21049	0.0545097	0	0.135873	0.140044	0.0826067	0	0	Ⅳ类 低资源-低产业型
416	75	北京市	北京市	北京市	北京市	密云区	北京南山滑雪场(暂停营业)	河南寨镇圣水头村北京南山滑雪滑水度假村	待识别	待划分	城郊体验型	GaodeAPI_text(滑雪场)	116.862	40.3307	B000A9WZYZ	北京市	低海拔人工造雪型	3	0	0.738287	0	0.528425	0.21137	Ⅲ 中等	498431000	2914		4.08856	0.924275	0.873658		0.491484	0.763139	0	1	Ⅲ类 低资源-高产业型
417	264	山东省	济南市	济南市	济南市	历下区	泉城公园冰雪大世界	经十路18762号泉城公园(西南角)	待识别	待划分	城市综合体室内雪场型	GaodeAPI_text(冰雪世界)	117.016	36.6433	B0HKT5GIE0	济南市	低海拔人工造雪型	3	0.0954545	0.734859	0.00895713	0.528534	0.216788	Ⅲ 中等	135276000	702.8	943.7	2.22687	0.250852	0.210709	0.440919	0.264154	0.291659	0	1	Ⅲ类 低资源-高产业型
418	589	河北省	沧州市	沧州市	沧州市	运河区	冰雪天地滑雪场	南陈屯乡沧州狮城公园北门对面	待识别	待划分	城郊体验型	GaodeAPI_text(滑雪场)	116.809	38.3075	B0KGFKZ10R	沧州市	低海拔人工造雪型	3	0.0204545	0.654942	0.00191939	0.531071	0.21358	Ⅲ 中等	47228000	118.78	726.46	2.12456	0.0875781	0.0356119	0.33942	0.25166	0.178568	0	1	Ⅲ类 低资源-高产业型
419	336	山西省	吕梁市	吕梁市	吕梁市	孝义市	曹溪河欢乐城滑雪场(暂停营业)	东许街道迎宾路南端西行10公里曹溪河欢乐城内	待识别	待划分	城郊体验型	GaodeAPI_text(滑雪场)	111.728	37.0622	B0FFGDKPL2	吕梁市	低海拔人工造雪型	3	0.422727	0.636854	0.0396673	0.531645	0.236458	Ⅲ 中等	26432400	232.84	334.65	0.428771	0.0490154	0.0698087	0.156357	0.0445888	0.0799424	1	0	Ⅱ类 高资源-低产业型
420	314	山东省	聊城市	聊城市	聊城市	东昌府区	聊城南湖公园滑雪场	聊阳路与西南环路交汇处	待识别	待划分	城郊体验型	GaodeAPI_text(滑雪场)	115.969	36.3966	B0FFGIZT9B	聊城市	低海拔人工造雪型	3	0.00681818	0.635659	0.000639795	0.531683	0.213057	Ⅲ 中等	31679600	130.3	585.93	1.479	0.0587457	0.0390658	0.273761	0.172831	0.136101	0	0	Ⅳ类 低资源-低产业型
421	360	山西省	晋中市	晋中市	晋中市	灵石县	红崖峡谷滑雪场(暂停营业)	马和乡小柏沟村	待识别	待划分	城郊体验型	GaodeAPI_text(滑雪场)	111.924	36.8696	B0FFHMZD69	晋中市	低海拔人工造雪型	3	0.025	0.617715	0.00234592	0.532253	0.214309	Ⅲ 中等	24588000	407.9	337.65	0.682164	0.0455952	0.122294	0.157758	0.0755305	0.100295	0	0	Ⅳ类 低资源-低产业型
422	204	天津市	天津市	天津市	天津市	武清区	中体滑雪训练中心	体育中心B馆	待识别	待划分	体育赛事/训练型	GaodeAPI_text(滑雪场)	117.012	39.3896	B0FFLG1GNU	天津市	低海拔人工造雪型	3	0	0.603235	0	0.532712	0.213085	Ⅲ 中等	180243200	0		2.77744	0.334237	0		0.331384	0.221874	0	1	Ⅲ类 低资源-高产业型
423	354	山西省	晋中市	晋中市	晋中市	昔阳县	山西崇家岭牧云滑雪场	[]	待识别	待划分	城郊体验型	GaodeAPI_text(滑雪场)	113.564	37.6441	B0LBYZINTM	晋中市	低海拔人工造雪型	3	0.025	0.594984	0.00234592	0.532974	0.214597	Ⅲ 中等	24588000	407.9	337.65	0.682164	0.0455952	0.122294	0.157758	0.0755305	0.100295	0	0	Ⅳ类 低资源-低产业型
424	858	陕西省	渭南市	渭南市	渭南市	韩城市	晋公山滑雪场(暂停营业)	板桥镇晋公村	待识别	待划分	城郊体验型	GaodeAPI_text(滑雪场)	110.264	35.5213	B0FFGAFUJ1	渭南市	低海拔人工造雪型	3	0.0363636	0.594964	0.00341224	0.532975	0.215237	Ⅲ 中等	21577300	352.06	0	0.835477	0.0400123	0.105553	0	0.0942515	0.0599541	0	0	Ⅳ类 低资源-低产业型
425	611	河北省	衡水市	衡水市	衡水市	武邑县	薛庄滑雪场(暂停营业)	龙店乡薛庄砖厂院内	待识别	待划分	城郊体验型	GaodeAPI_text(滑雪场)	115.818	37.9042	B0FFLNB03J	衡水市	低海拔人工造雪型	3	0.0818182	0.571176	0.00767754	0.53373	0.218099	Ⅲ 中等	19718000	107.73	415.76	2.46783	0.0365644	0.032299	0.194253	0.293577	0.139173	0	1	Ⅲ类 低资源-高产业型
426	224	宁夏回族自治区	银川市	银川市	银川市	金凤区	宁夏阅海滑雪场(暂停营业)	满城北街阅海公园内	待识别	待划分	城郊体验型	GaodeAPI_text(滑雪场)	106.191	38.5481	B0FFFI09Z1	银川市	低海拔人工造雪型	3	0	0.550161	0	0.534397	0.213759	Ⅲ 中等	29395300	0	290.81	1.21049	0.0545097	0	0.135873	0.140044	0.0826067	0	0	Ⅳ类 低资源-低产业型
427	520	江苏省	连云港市	连云港市	连云港市	赣榆区	妙木山滑雪度假区(暂停营业)	班庄镇吴沟村夹谷山风景区西门	待识别	待划分	滑雪+度假综合型	GaodeAPI_text(滑雪场)	118.848	34.9267	B0JUYCV3KL	连云港市	低海拔人工造雪型	3	0.0113636	0.5494	0.00106633	0.534421	0.214408	Ⅲ 中等	46631300	587.93	459.4	2.28864	0.0864716	0.17627	0.214643	0.271697	0.18727	0	1	Ⅲ类 低资源-高产业型
428	622	河北省	邢台市	邢台市	邢台市	隆尧县	永兴滑雪场	鼎新酒店南1500米路东	待识别	待划分	城郊体验型	GaodeAPI_text(滑雪场)	114.787	37.3245	B0IKTAGKI4	邢台市	低海拔人工造雪型	3	0.00909091	0.5129	0.00085306	0.53558	0.214744	Ⅲ 中等	27659000	191.23	695.55	2.06729	0.05129	0.0573335	0.324978	0.244667	0.169567	0	1	Ⅲ类 低资源-高产业型
429	250	山东省	日照市	日照市	日照市	东港区	龙门崮滑雪场(暂停开放)	三庄镇龙门崮景区旁	待识别	待划分	滑雪+度假综合型	GaodeAPI_text(滑雪场)	119.135	35.5481	B0FFLH3KS4	日照市	低海拔人工造雪型	3	0	0.510983	0	0.535641	0.214256	Ⅲ 中等	25568900	221.9	308.36	1.73341	0.0474142	0.0665288	0.144073	0.203898	0.115479	0	0	Ⅳ类 低资源-低产业型
430	633	河南省	三门峡市	三门峡市	三门峡市	湖滨区	三门峡黄河滑雪场	七里沟村(中流砥柱景区内)	待识别	待划分	城郊体验型	GaodeAPI_text(滑雪场)	111.361	34.8077	B0KKZUTJWS	三门峡市	低海拔人工造雪型	3	0.025	0.490035	0.00234592	0.536306	0.21593	Ⅲ 中等	16186900	195.1	202	0.570534	0.0300165	0.0584937	0.0943793	0.0618994	0.0611972	0	0	Ⅳ类 低资源-低产业型
431	267	山东省	济南市	济南市	济南市	历城区	世际园滑雪场(暂停营业)	仲宫街道卧虎山水库旁	待识别	待划分	城郊体验型	GaodeAPI_text(滑雪场)	116.954	36.4921	B02130ZKGZ	济南市	低海拔人工造雪型	3	0.0954545	0.481838	0.00895713	0.536566	0.220001	Ⅲ 中等	135276000	702.8	943.7	2.22687	0.250852	0.210709	0.440919	0.264154	0.291659	0	1	Ⅲ类 低资源-高产业型
432	308	山东省	烟台市	烟台市	烟台市	海阳市	林山滑雪场	林寺山(郭城镇南1.5公里处)	待识别	待划分	城郊体验型	GaodeAPI_text(滑雪场)	121.125	37.0303	B02170UINN	烟台市	低海拔人工造雪型	3	0	0.471568	0	0.536892	0.214757	Ⅲ 中等	107828300	624.4	703.22	2.95762	0.199953	0.187204	0.328561	0.353386	0.267276	0	1	Ⅲ类 低资源-高产业型
433	599	河北省	石家庄市	石家庄市	石家庄市	正定县	深国际·正定智慧港滑雪场	云长路57号	待识别	待划分	城郊体验型	GaodeAPI_text(滑雪场)	114.554	38.1685	B0LGDMHLHI	石家庄市	低海拔人工造雪型	3	0.00681818	0.469693	0.000639795	0.536951	0.215164	Ⅲ 中等	82034000	684.2	1123.35	2.03768	0.152121	0.205133	0.524856	0.241052	0.280791	0	1	Ⅲ类 低资源-高产业型
434	660	河南省	洛阳市	洛阳市	洛阳市	洛龙区	万安山国际滑雪中心(暂停营业)	李村镇伊洛大道与玄奘路交汇处南500米路东	待识别	待划分	城郊体验型	GaodeAPI_text(滑雪场)	112.562	34.5681	B0FFGG7J8Z	洛阳市	低海拔人工造雪型	3	0	0.467	0	0.537037	0.214815	Ⅲ 中等	58186000	795.4	707.9	0.913638	0.107898	0.238472	0.330748	0.103796	0.195229	0	1	Ⅲ类 低资源-高产业型
435	750	甘肃省	白银市	白银市	白银市	景泰县	条山冰雪乐园(暂停营业)	一条山镇富士村199号	室内	待划分	城市综合体室内雪场型	GaodeAPI_text(冰雪乐园)	104.006	37.1869	B0IK05MHPU	白银市	低海拔人工造雪型	3	0.143182	0.427688	0.0134357	0.538285	0.223375	Ⅲ 中等	7428700	64.7	148.81	0.562473	0.0137755	0.019398	0.0695276	0.0609151	0.0409041	0	0	Ⅳ类 低资源-低产业型
436	623	河北省	邢台市	邢台市	邢台市	隆尧县	闹雪园滑雪场	邢台兵魂特训营西南侧150米	待识别	待划分	城郊体验型	GaodeAPI_text(滑雪场)	114.765	37.3802	B0J66R6OK7	邢台市	低海拔人工造雪型	3	0.00909091	0.42418	0.00085306	0.538396	0.21587	Ⅲ 中等	27659000	191.23	695.55	2.06729	0.05129	0.0573335	0.324978	0.244667	0.169567	0	1	Ⅲ类 低资源-高产业型
437	294	山东省	淄博市	淄博市	淄博市	淄川区	齐乐梦华梓橦山滑雪场(暂停营业)	双杨镇藏梓村	待识别	待划分	城郊体验型	GaodeAPI_text(滑雪场)	118.029	36.6661	B0J6MZDG0N	淄博市	低海拔人工造雪型	3	0.120455	0.417558	0.011303	0.538606	0.222224	Ⅲ 中等	48840800	406.2	467.4	1.46726	0.0905688	0.121784	0.218381	0.171398	0.150533	0	1	Ⅲ类 低资源-高产业型
438	671	河南省	濮阳市	濮阳市	濮阳市	濮阳县	龙云居滑雪场	庆祖镇前武陵村	待识别	待划分	城郊体验型	GaodeAPI_text(滑雪场)	115.002	35.5247	B0FFM4BTMR	濮阳市	低海拔人工造雪型	3	0.00681818	0.412604	0.000639795	0.538763	0.215889	Ⅲ 中等	20185500	35.5	370.1	3.18232	0.0374314	0.0106434	0.17292	0.380823	0.150454	0	1	Ⅲ类 低资源-高产业型
439	290	山东省	淄博市	淄博市	淄博市	张店区	志速城市滑雪空间(淄博万象汇)	金晶大道66号淄博万象汇L3层L366	待识别	待划分	城市综合体室内雪场型	GaodeAPI_text(滑雪场)	118.061	36.8014	B0IKJN4ITL	淄博市	低海拔人工造雪型	3	0.120455	0.411171	0.011303	0.538809	0.222305	Ⅲ 中等	48840800	406.2	467.4	1.46726	0.0905688	0.121784	0.218381	0.171398	0.150533	0	1	Ⅲ类 低资源-高产业型
440	849	陕西省	榆林市	榆林市	榆林市	神木市	碧麟湾国际滑雪场	韩解路碧麟湾景区内(西侧)	待识别	待划分	城郊体验型	GaodeAPI_text(滑雪场)	110.525	38.707	B0J0MSZ85V	榆林市	低海拔人工造雪型	3	0	0.387486	0	0.539561	0.215824	Ⅲ 中等	75486800	103.37	360.73	0.440279	0.13998	0.0309918	0.168542	0.045994	0.096377	0	0	Ⅳ类 低资源-低产业型
441	450	新疆维吾尔自治区	和田地区	和田地区	和田地区	和田县	和田县昆仑山七星雪滑雪场	朗如乡普夏新村东侧	待识别	待划分	城市综合体室内雪场型	GaodeAPI_text(冰雪世界)	79.7658	36.9725	B0FFLJ71W1	和田地区	低海拔人工造雪型	3	0.0772727	0.385976	0.00725101	0.539609	0.220194	Ⅲ 中等			0	0.074398			0	0.00131646	0.000658231	0	0	Ⅳ类 低资源-低产业型
442	258	山东省	泰安市	泰安市	泰安市	岱岳区	徂徕山滑雪场	徂汶景区徂徕镇桥沟村	待识别	待划分	城郊体验型	GaodeAPI_text(滑雪场)	117.221	36.0756	B021A027IB	泰安市	低海拔人工造雪型	3	0.0477273	0.384983	0.00447857	0.53964	0.218543	Ⅲ 中等	36221000	482.1	534.87	1.54469	0.0671671	0.14454	0.249904	0.180853	0.160616	0	1	Ⅲ类 低资源-高产业型
443	309	山东省	烟台市	烟台市	烟台市	芝罘区	南里必捷滑雪公园(暂停营业)	通林路南里村1号	待识别	待划分	城郊体验型	GaodeAPI_text(滑雪场)	121.338	37.4528	B0FFJRIIZ8	烟台市	低海拔人工造雪型	3	0	0.376185	0	0.539919	0.215968	Ⅲ 中等	107828300	624.4	703.22	2.95762	0.199953	0.187204	0.328561	0.353386	0.267276	0	1	Ⅲ类 低资源-高产业型
444	346	山西省	太原市	太原市	太原市	万柏林区	九润滑雪场(暂停营业)	西铭街道杜儿坪街西山化工小区往北100米	待识别	待划分	城郊体验型	GaodeAPI_text(滑雪场)	112.433	37.8497	B0FFHIPIO4	太原市	低海拔人工造雪型	3	0.170455	0.282207	0.0159949	0.542903	0.226758	Ⅲ 中等	54188700	354.69	0	1.52342	0.100486	0.106341	0	0.178256	0.0962706	1	0	Ⅱ类 高资源-低产业型
445	735	甘肃省	兰州市	兰州市	兰州市	城关区	甘肃冰雪室内滑雪馆	雁西路1396号1层	室内	待划分	城市综合体室内雪场型	GaodeAPI_text(滑雪场)	103.877	36.0693	B0GRAR5WV5	兰州市	低海拔人工造雪型	3	0.402273	0.279508	0.0377479	0.542988	0.239844	Ⅲ 中等	37423000	421.4	442.51	1.03271	0.069396	0.126342	0.206751	0.118335	0.130206	1	0	Ⅱ类 高资源-低产业型
446	321	山东省	青岛市	青岛市	青岛市	即墨区	金山滑雪场(暂停营业)	金口镇虎埠前村388号金山旅游度假区	待识别	待划分	城郊体验型	GaodeAPI_text(滑雪场)	120.733	36.6199	B0FFFR4JXW	青岛市	低海拔人工造雪型	3	0	0.253976	0	0.543799	0.217519	Ⅲ 中等	167194600	1019.3	1037.15	2.35537	0.31004	0.305601	0.484582	0.279845	0.345017	0	1	Ⅲ类 低资源-高产业型
447	670	河南省	濮阳市	濮阳市	濮阳市	南乐县	乐悠悠滑雪场	012县道	待识别	待划分	城郊体验型	GaodeAPI_text(滑雪场)	115.159	36.1114	B0KKTZRVRA	濮阳市	低海拔人工造雪型	3	0.00681818	0.235108	0.000639795	0.544398	0.218143	Ⅲ 中等	20185500	35.5	370.1	3.18232	0.0374314	0.0106434	0.17292	0.380823	0.150454	0	1	Ⅲ类 低资源-高产业型
448	683	河南省	郑州市	郑州市	郑州市	荥阳市	郑州市九龙口冰雪大世界(暂停开放)	汜水镇九龙口	待识别	待划分	城市综合体室内雪场型	GaodeAPI_text(滑雪场)	113.162	34.8266	B0FFIP686V	郑州市	低海拔人工造雪型	3	0	0.231418	0	0.544515	0.217806	Ⅲ 中等	145321000	1401.1	1300.8	2.99446	0.269479	0.42007	0.607765	0.357884	0.413799	0	1	Ⅲ类 低资源-高产业型
449	578	河北省	张家口市	张家口市	张家口市	张北县	塞那都冰雪世界(暂停营业)	小二台镇小二台乡塞娜都冰雪世界	室内	待划分	城市综合体室内雪场型	GaodeAPI_text(冰雪世界)	114.917	41.163	B0FFFRU6E9	张家口市	低海拔人工造雪型	3	0.752273	0.229427	0.0705907	0.544578	0.260186	Ⅳ 较高	19133000	213.58	405.01	1.00065	0.0354796	0.0640343	0.18923	0.11442	0.100791	1	0	Ⅱ类 高资源-低产业型
450	618	河北省	邢台市	邢台市	邢台市	巨鹿县	佳乐滑雪场	光明街与团结路交叉口东南500米	待识别	待划分	城郊体验型	GaodeAPI_text(滑雪场)	115.05	37.246	B0KBTH1BFU	邢台市	低海拔人工造雪型	3	0.00909091	0.212395	0.00085306	0.545119	0.218559	Ⅲ 中等	27659000	191.23	695.55	2.06729	0.05129	0.0573335	0.324978	0.244667	0.169567	0	1	Ⅲ类 低资源-高产业型
451	349	山西省	太原市	太原市	太原市	杏花岭区	龙庄曦岭滑雪场	中涧河乡中涧河村3号	待识别	待划分	城郊体验型	GaodeAPI_text(滑雪场)	112.627	37.9282	B0FFFL0QJP	太原市	低海拔人工造雪型	3	0.170455	0.18725	0.0159949	0.545917	0.227964	Ⅲ 中等	54188700	354.69	0	1.52342	0.100486	0.106341	0	0.178256	0.0962706	1	0	Ⅱ类 高资源-低产业型
452	873	青海省	西宁市	西宁市	西宁市	城中区	鹿塬国际滑雪场	总寨塬区域	待识别	待划分	城郊体验型	GaodeAPI_text(滑雪场)	101.676	36.5261	B0JKSS37ZT	西宁市	低海拔人工造雪型	3	1.14773	0.181613	0.107699	0.546096	0.283058	Ⅳ 较高	18621000	219.71	248.1	0.614105	0.0345302	0.0658722	0.115918	0.0672198	0.0708851	1	0	Ⅱ类 高资源-低产业型
453	253	山东省	枣庄市	枣庄市	枣庄市	台儿庄区	台儿庄古道滑雪场(暂停营业)	马兰屯镇运河北岸路台儿庄滑雪场及水上乐园	待识别	待划分	城郊体验型	GaodeAPI_text(滑雪场)	117.699	34.5561	B0FFJZ6JNF	枣庄市	低海拔人工造雪型	3	0	0.168858	0	0.546501	0.2186	Ⅲ 中等	23864100	132.5	380.98	1.77219	0.0442528	0.0397254	0.178003	0.208633	0.117654	0	0	Ⅳ类 低资源-低产业型
454	587	河北省	沧州市	沧州市	沧州市	海兴县	沧海风景区滑雪场	沧海文化风景区	待识别	待划分	滑雪+度假综合型	GaodeAPI_text(滑雪场)	117.754	38.2522	B0IBGSYGUF	沧州市	低海拔人工造雪型	3	0.0204545	0.115066	0.00191939	0.548208	0.220435	Ⅲ 中等	47228000	118.78	726.46	2.12456	0.0875781	0.0356119	0.33942	0.25166	0.178568	0	1	Ⅲ类 低资源-高产业型
455	592	河北省	石家庄市	石家庄市	石家庄市	井陉矿区	清凉山滑雪场	世纪大道与西环旅游路交汇处北行200米	待识别	待划分	城郊体验型	GaodeAPI_text(滑雪场)	114.021	38.0714	B0137068ZN	石家庄市	低海拔人工造雪型	3	0.00681818	0.0936259	0.000639795	0.548889	0.219939	Ⅲ 中等	82034000	684.2	1123.35	2.03768	0.152121	0.205133	0.524856	0.241052	0.280791	0	1	Ⅲ类 低资源-高产业型
456	215	宁夏回族自治区	石嘴山市	石嘴山市	石嘴山市	大武口区	冰雪乐园(华夏奇石山店)	大武口奇石山(东北角)	室内	待划分	城市综合体室内雪场型	GaodeAPI_text(冰雪世界)	106.397	38.9958	B0FFGE2WB8	石嘴山市	低海拔人工造雪型	3	0	0.0864785	0	0.549115	0.219646	Ⅲ 中等	5655300	15.29	75.09	0.736112	0.010487	0.00458416	0.0350839	0.082118	0.0330683	0	0	Ⅳ类 低资源-低产业型
457	69	北京市	北京市	北京市	北京市	大兴区	十万雪极室内滑雪(亦庄店)	亦庄镇亦花园园区10栋10-1层1701号	室内	待划分	城市综合体室内雪场型	GaodeAPI_text(滑雪场)	116.538	39.8224	B0H39ZR2YY	北京市	低海拔人工造雪型	3	0	0.0633432	0	0.54985	0.21994	Ⅲ 中等	498431000	2914		4.08856	0.924275	0.873658		0.491484	0.763139	0	1	Ⅲ类 低资源-高产业型
458	458	新疆维吾尔自治区	图木舒克市	图木舒克市	图木舒克市	图木舒克市	永安湖冰雪乐园	永安湖景区	室内	待划分	城市综合体室内雪场型	GaodeAPI_text(冰雪世界)	78.9904	39.7296	B0JKR7YLFX	图木舒克市	低海拔人工造雪型	3	0	0.0482322	0	0.550329	0.220132	Ⅲ 中等				0.567279				0.0615019	0.0615019	0	0	Ⅳ类 低资源-低产业型
459	120	北京市	北京市	北京市	北京市	顺义区	北京乔波滑雪馆	顺安路6号	待识别	待划分	城市综合体室内雪场型	GaodeAPI_text(滑雪场)	116.662	40.2001	B000A7Q5WI	北京市	低海拔人工造雪型	3	0	0.00953299	0	0.551558	0.220623	Ⅲ 中等	498431000	2914		4.08856	0.924275	0.873658		0.491484	0.763139	0	1	Ⅲ类 低资源-高产业型
460	547	河北省	唐山市	唐山市	唐山市	丰南区	唐山运河冰雪大世界	景政路7号	待识别	待划分	城市综合体室内雪场型	GaodeAPI_text(冰雪世界)	118.023	39.5179	B0K0VUKDGD	唐山市	低海拔人工造雪型	3	0	-0.00433786	0	0.551998	0.220799	Ⅲ 中等	100039000	446.97	771.95	1.98314	0.185509	0.134008	0.360674	0.234392	0.228646	0	1	Ⅲ类 低资源-高产业型
461	591	河北省	石家庄市	石家庄市	石家庄市	井陉县	秦皇古道滑雪场(暂停营业)	上安镇白王庄村东天门	待识别	待划分	城郊体验型	GaodeAPI_text(滑雪场)	114.179	38.0457	B013706CQQ	石家庄市	低海拔人工造雪型	3	0.00681818	-0.0164738	0.000639795	0.552383	0.221337	Ⅲ 中等	82034000	684.2	1123.35	2.03768	0.152121	0.205133	0.524856	0.241052	0.280791	0	1	Ⅲ类 低资源-高产业型
462	61	北京市	北京市	北京市	北京市	丰台区	YOSKI尤斯卡室内滑雪(凯德MALL·大峡谷店)	南三环西路16号凯德MALL·大峡谷F3层	室内	待划分	城市综合体室内雪场型	GaodeAPI_text(滑雪场)	116.367	39.8546	B0JAR16W00	北京市	低海拔人工造雪型	3	0	-0.0209208	0	0.552525	0.22101	Ⅲ 中等	498431000	2914		4.08856	0.924275	0.873658		0.491484	0.763139	0	1	Ⅲ类 低资源-高产业型
463	271	山东省	济南市	济南市	济南市	历城区	蟠龙山滑雪场(暂停营业)	旅游路8228号济南国际赛马场内	待识别	待划分	城郊体验型	GaodeAPI_text(滑雪场)	117.24	36.6404	B0FFGBJBAM	济南市	低海拔人工造雪型	3	0.0954545	-0.0236647	0.00895713	0.552612	0.226419	Ⅲ 中等	135276000	702.8	943.7	2.22687	0.250852	0.210709	0.440919	0.264154	0.291659	1	1	Ⅰ类 高资源-高产业型
464	244	山东省	威海市	威海市	威海市	环翠区	威海恒山滑雪场(暂停营业)	初村镇宏山路路南	待识别	待划分	城郊体验型	GaodeAPI_text(滑雪场)	121.929	37.4007	B027715J60	威海市	低海拔人工造雪型	3	0	-0.042095	0	0.553197	0.221279	Ⅲ 中等	37286200	393.1	291.36	1.60219	0.0691424	0.117857	0.13613	0.187875	0.127751	0	0	Ⅳ类 低资源-低产业型
465	363	山西省	晋城市	晋城市	晋城市	陵川县	七彩太行云上滑雪场-A区	池南掌	待识别	待划分	城郊体验型	GaodeAPI_text(滑雪场)	113.416	35.811	B0I6GZI5AL	晋城市	低海拔人工造雪型	3	0.190909	-0.0681788	0.0179143	0.554025	0.232358	Ⅲ 中等	24098000	293.45	217.18	0.792354	0.0446866	0.0879805	0.101472	0.0889857	0.0807811	1	0	Ⅱ类 高资源-低产业型
466	600	河北省	石家庄市	石家庄市	石家庄市	行唐县	熊熊岭滑雪场	颍水大道杨段庄路段路东	待识别	待划分	滑雪+度假综合型	GaodeAPI_text(滑雪场)	114.482	38.4757	B0K6NS4KCP	石家庄市	低海拔人工造雪型	3	0.00681818	-0.0912627	0.000639795	0.554757	0.222287	Ⅲ 中等	82034000	684.2	1123.35	2.03768	0.152121	0.205133	0.524856	0.241052	0.280791	0	1	Ⅲ类 低资源-高产业型
467	823	陕西省	咸阳市	咸阳市	咸阳市	渭城区	际华冰雪·西安冰雪中心室内滑雪场	万科金域缇香西北侧360米	室内	待划分	城市综合体室内雪场型	GaodeAPI_text(滑雪场)	108.789	34.3921	B0KD6LGGGP	咸阳市	低海拔人工造雪型	3	0.0295455	-0.136183	0.00277245	0.556183	0.224137	Ⅲ 中等	30012700	341.53	412.1	1.15529	0.0556546	0.102396	0.192543	0.133304	0.120974	0	0	Ⅳ类 低资源-低产业型
468	260	山东省	泰安市	泰安市	泰安市	泰山区	泰山冰雪文体中心	博阳路中段泰山花样年华景区(西北角)	待识别	待划分	城市综合体室内雪场型	GaodeAPI_text(冰雪世界)	117.215	36.1781	B0G2UZ3VJD	泰安市	低海拔人工造雪型	3	0.0477273	-0.152093	0.00447857	0.556688	0.225362	Ⅲ 中等	36221000	482.1	534.87	1.54469	0.0671671	0.14454	0.249904	0.180853	0.160616	0	1	Ⅲ类 低资源-高产业型
469	872	青海省	海西蒙古族藏族自治州	海西蒙古族藏族自治州	海西蒙古族藏族自治州	格尔木市	格尔木冰雪大世界	旅游集散中心	待识别	待划分	城市综合体室内雪场型	GaodeAPI_text(滑雪中心)	94.8587	36.398	B0H0JCXHIE	海西蒙古族藏族自治州	低海拔人工造雪型	3	4.45682	-0.155802	0.418213	0.556806	0.47365	Ⅴ 很高			47.1	0.065582			0.0220063	0.000239945	0.0111231	1	0	Ⅱ类 高资源-低产业型
470	597	河北省	石家庄市	石家庄市	石家庄市	栾城区	趣北极冰雪大世界(暂停开放)	卓达太阳城星光大道与三民路交口西行50米路北	待识别	待划分	城市综合体室内雪场型	GaodeAPI_text(冰雪世界)	114.592	37.9534	B0JKLC5L45	石家庄市	低海拔人工造雪型	3	0.00681818	-0.155878	0.000639795	0.556808	0.223107	Ⅲ 中等	82034000	684.2	1123.35	2.03768	0.152121	0.205133	0.524856	0.241052	0.280791	0	1	Ⅲ类 低资源-高产业型
471	843	陕西省	榆林市	榆林市	榆林市	榆阳区	榆麻路滑雪场	牛家梁镇边墙村石庄梁村民小组2号	待识别	待划分	城郊体验型	GaodeAPI_text(滑雪场)	109.785	38.3251	B0L6NZTCIY	榆林市	低海拔人工造雪型	3	0	-0.15762	0	0.556864	0.222745	Ⅲ 中等	75486800	103.37	360.73	0.440279	0.13998	0.0309918	0.168542	0.045994	0.096377	0	0	Ⅳ类 低资源-低产业型
472	281	山东省	济南市	济南市	济南市	莱芜区	雪野滑雪场	雪野航空科技体育公园内	待识别	待划分	城郊体验型	GaodeAPI_text(滑雪场)	117.578	36.4316	B0FFFH0JOV	济南市	低海拔人工造雪型	3	0.0954545	-0.160282	0.00895713	0.556948	0.228154	Ⅲ 中等	135276000	702.8	943.7	2.22687	0.250852	0.210709	0.440919	0.264154	0.291659	1	1	Ⅰ类 高资源-高产业型
473	835	陕西省	延安市	延安市	延安市	宝塔区	延安国际滑雪场(暂停营业)	清凉山以北,新区贵人峁观景台西南侧	待识别	待划分	城郊体验型	GaodeAPI_text(滑雪场)	109.484	36.6231	B0FFIDQ3XV	延安市	低海拔人工造雪型	3	0	-0.174076	0	0.557386	0.222954	Ⅲ 中等	23833600	108.96	226.14	0.324094	0.0441963	0.0326677	0.105658	0.0318067	0.0535822	0	0	Ⅳ类 低资源-低产业型
474	736	甘肃省	兰州市	兰州市	兰州市	城关区	雪乐山室内滑雪(兰州环球中心店)	民主东路226号中天健环球中心一层172号	室内	待划分	城市综合体室内雪场型	GaodeAPI_text(滑雪中心)	103.844	36.0445	B0K6RRBCN2	兰州市	低海拔人工造雪型	3	0.402273	-0.175798	0.0377479	0.557441	0.245625	Ⅳ 较高	37423000	421.4	442.51	1.03271	0.069396	0.126342	0.206751	0.118335	0.130206	1	0	Ⅱ类 高资源-低产业型
475	158	吉林省	白山市	白山市	白山市	江源区	风之谷雪上乐园(暂停营业)	江源区政府后地藏寺赛车场旁	待识别	待划分	城市综合体室内雪场型	GaodeAPI_text(冰雪世界)	126.571	42.0673	B0FFIQIIUV	白山市	低海拔人工造雪型	3	5.78409	-0.187702	0.54276	0.557819	0.548783	Ⅴ 很高	5678500	0	89.59	0.42315	0.01053	0	0.0418586	0.0439024	0.0240728	1	0	Ⅱ类 高资源-低产业型
476	339	山西省	吕梁市	吕梁市	吕梁市	离石区	悦隆滑雪场(暂停营业)	下水村11号	待识别	待划分	城郊体验型	GaodeAPI_text(滑雪场)	111.115	37.536	B0FFIRCPQK	吕梁市	低海拔人工造雪型	3	0.422727	-0.225818	0.0396673	0.559028	0.247412	Ⅳ 较高	26432400	232.84	334.65	0.428771	0.0490154	0.0698087	0.156357	0.0445888	0.0799424	1	0	Ⅱ类 高资源-低产业型
477	778	辽宁省	大连市	大连市	大连市	金州区	铭湖滑雪场	炮台镇沈大高速炮台出口500米处	待识别	待划分	滑雪+度假综合型	GaodeAPI_text(滑雪度假区)	121.803	39.4988	B0FFF01N15	大连市	低海拔人工造雪型	3	0	-0.243472	0	0.559589	0.223836	Ⅲ 中等	95169000	610.3	753.9	1.4274	0.176478	0.182977	0.35224	0.166531	0.219557	0	1	Ⅲ类 低资源-高产业型
478	353	山西省	晋中市	晋中市	晋中市	太谷区	梅苑南山滑雪场(暂停营业)	梅苑山庄	待识别	待划分	城郊体验型	GaodeAPI_text(滑雪场)	112.85	37.4267	B0162017MZ	晋中市	低海拔人工造雪型	3	0.025	-0.26237	0.00234592	0.560189	0.225483	Ⅲ 中等	24588000	407.9	337.65	0.682164	0.0455952	0.122294	0.157758	0.0755305	0.100295	0	0	Ⅳ类 低资源-低产业型
479	358	山西省	晋中市	晋中市	晋中市	榆次区	李宁乌金山国际滑雪场(暂停营业)	乌金山国家森林公园太清宫附近	待识别	待划分	城郊体验型	GaodeAPI_text(滑雪场)	112.788	37.8725	B0FFHJ6Y3T	晋中市	低海拔人工造雪型	3	0.025	-0.265873	0.00234592	0.5603	0.225528	Ⅲ 中等	24588000	407.9	337.65	0.682164	0.0455952	0.122294	0.157758	0.0755305	0.100295	0	0	Ⅳ类 低资源-低产业型
480	305	山东省	潍坊市	潍坊市	潍坊市	青州市	青州驼山滑雪场(暂停营业)	仰天山路与凤凰山西路交叉口南200米路西	待识别	待划分	城郊体验型	GaodeAPI_text(滑雪场)	118.447	36.6686	B021816YD4	潍坊市	低海拔人工造雪型	3	0.131818	-0.288733	0.0123694	0.561026	0.231832	Ⅲ 中等	82032000	509	936.95	2.20289	0.152118	0.152605	0.437766	0.261226	0.250929	1	1	Ⅰ类 高资源-高产业型
481	326	山东省	青岛市	青岛市	青岛市	崂山区	青岛崂山冰雪王国(暂停开放)	梅岭东路与秦岭路交叉口东260米	待识别	待划分	城市综合体室内雪场型	GaodeAPI_text(滑雪度假区)	120.473	36.1004	B0FFIJOJFS	青岛市	低海拔人工造雪型	3	0	-0.304751	0	0.561534	0.224614	Ⅲ 中等	167194600	1019.3	1037.15	2.35537	0.31004	0.305601	0.484582	0.279845	0.345017	0	1	Ⅲ类 低资源-高产业型
482	537	河北省	保定市	保定市	保定市	涞水县	涞水县喜涞滑雪场(建设中)	东文山镇安家洼村文明南路3号	待识别	待划分	城郊体验型	GaodeAPI_text(滑雪场)	115.685	39.4114	B0KKO70OFG	保定市	低海拔人工造雪型	3	0.00454545	-0.304887	0.00042653	0.561538	0.224871	Ⅲ 中等	47733000	684.19	909.89	1.29013	0.0885146	0.20513	0.425123	0.149769	0.217134	0	1	Ⅲ类 低资源-高产业型
483	935	内蒙古自治区	阿拉善盟	阿拉善盟		阿拉善左旗	阿拉善左旗大漠奇石冰雪乐园		户外		城郊体验型	手工补录：锡林浩特市正达滑雪场.docx	105.674	38.8254		阿拉善盟	低海拔人工造雪型	3	0.134091	-0.311906	0.0125826	0.561761	0.232254	Ⅲ 中等										1	0	Ⅱ类 高资源-低产业型
484	836	陕西省	延安市	延安市	延安市	延川县	丰柏胜冰雪乐园(暂停营业)	永坪镇丰柏胜村	室内	待划分	城市综合体室内雪场型	GaodeAPI_text(冰雪乐园)	109.717	37.0163	B0J6FL2VBS	延安市	低海拔人工造雪型	3	0	-0.314715	0	0.56185	0.22474	Ⅲ 中等	23833600	108.96	226.14	0.324094	0.0441963	0.0326677	0.105658	0.0318067	0.0535822	0	0	Ⅳ类 低资源-低产业型
485	66	北京市	北京市	北京市	北京市	丰台区	阿比特室内滑雪俱乐部	长辛店街道陈庄大街70号	室内	待划分	城市综合体室内雪场型	GaodeAPI_text(滑雪场)	116.196	39.825	B0JULCTUZ4	北京市	低海拔人工造雪型	3	0	-0.320905	0	0.562047	0.224819	Ⅲ 中等	498431000	2914		4.08856	0.924275	0.873658		0.491484	0.763139	0	1	Ⅲ类 低资源-高产业型
486	379	山西省	长治市	长治市	长治市	平顺县	东壹山亚布洛尼国际滑雪场(暂停营业)	北社乡小铎村1号	待识别	待划分	城郊体验型	GaodeAPI_text(滑雪场)	113.211	36.2467	B0FFIR3MTV	长治市	低海拔人工造雪型	3	0.284091	-0.33176	0.0266581	0.562391	0.240951	Ⅲ 中等	25934000	271.22	312.66	0.786299	0.0480912	0.0813156	0.146082	0.0882464	0.0909339	1	0	Ⅱ类 高资源-低产业型
487	221	宁夏回族自治区	银川市	银川市	银川市	灵武市	梧桐湖冰雪欢乐岛	梧桐湖滑冰场旁	待识别	待划分	城郊体验型	GaodeAPI_text(冰雪乐园)	106.265	38.1907	B0J6PU217R	银川市	低海拔人工造雪型	3	0	-0.344059	0	0.562782	0.225113	Ⅲ 中等	29395300	0	290.81	1.21049	0.0545097	0	0.135873	0.140044	0.0826067	0	0	Ⅳ类 低资源-低产业型
488	93	北京市	北京市	北京市	北京市	昌平区	华彬猛犸滑雪场	南口镇农辛路9号华彬生态园北门	待识别	待划分	城郊体验型	GaodeAPI_text(滑雪场)	116.13	40.2093	B0FFLDO9NF	北京市	低海拔人工造雪型	3	0	-0.346854	0	0.56287	0.225148	Ⅲ 中等	498431000	2914		4.08856	0.924275	0.873658		0.491484	0.763139	0	1	Ⅲ类 低资源-高产业型
489	313	山东省	烟台市	烟台市	烟台市	龙口市	山东南山国际滑雪场(暂停营业)	泳汶河西路南山旅游景区(东南角)	待识别	待划分	城郊体验型	GaodeAPI_text(滑雪场)	120.487	37.5569	B0J21SINRD	烟台市	低海拔人工造雪型	3	0	-0.354472	0	0.563112	0.225245	Ⅲ 中等	107828300	624.4	703.22	2.95762	0.199953	0.187204	0.328561	0.353386	0.267276	0	1	Ⅲ类 低资源-高产业型
490	738	甘肃省	兰州市	兰州市	兰州市	榆中县	兰州兴隆山国际滑雪场	城关镇兴隆山村6号	待识别	待划分	城郊体验型	GaodeAPI_text(滑雪场)	104.082	35.8158	B03A30BH1E	兰州市	低海拔人工造雪型	3	0.402273	-0.374651	0.0377479	0.563753	0.24815	Ⅳ 较高	37423000	421.4	442.51	1.03271	0.069396	0.126342	0.206751	0.118335	0.130206	1	0	Ⅱ类 高资源-低产业型
491	287	山东省	济宁市	济宁市	济宁市	邹城市	绿鑫春滑雪场	石墙镇羊绪村村西500米	待识别	待划分	城郊体验型	GaodeAPI_text(滑雪场)	116.892	35.2286	B0FFMHLR2G	济宁市	低海拔人工造雪型	3	0.00454545	-0.376822	0.00042653	0.563822	0.225785	Ⅲ 中等	58675000	453.1	824.05	1.31227	0.108805	0.135846	0.385016	0.152472	0.195535	0	1	Ⅲ类 低资源-高产业型
492	293	山东省	淄博市	淄博市	淄博市	淄川区	淄川齐梦乐华梓潼山滑雪场(暂停营业)	藏梓村村委东南300米	待识别	待划分	城郊体验型	GaodeAPI_text(滑雪场)	118.029	36.668	B0IKD78RZT	淄博市	低海拔人工造雪型	3	0.120455	-0.413215	0.011303	0.564977	0.232773	Ⅲ 中等	48840800	406.2	467.4	1.46726	0.0905688	0.121784	0.218381	0.171398	0.150533	1	1	Ⅰ类 高资源-高产业型
493	480	新疆维吾尔自治区	阿克苏地区	阿克苏地区	阿克苏地区	阿克苏市	阿克苏迎宾公园冰雪乐园	柯柯牙街道前进东路与东风路交叉口处(迎宾公园前进路入口)	室内	待划分	城市综合体室内雪场型	GaodeAPI_text(冰雪世界)	80.2897	41.2059	B0J0NU4DB5	阿克苏地区	低海拔人工造雪型	3	0.654545	-0.427421	0.0614203	0.565428	0.263023	Ⅳ 较高			0	0.117211			0	0.00654434	0.00327217	1	0	Ⅱ类 高资源-低产业型
494	88	北京市	北京市	北京市	北京市	昌平区	世纪星国际冰雪体育中心	小汤山镇九华山庄17区C馆	待识别	待划分	城市综合体室内雪场型	GaodeAPI_text(冰雪世界)	116.42	40.1831	B0FFJTFE96	北京市	低海拔人工造雪型	3	0	-0.43036	0	0.565521	0.226208	Ⅲ 中等	498431000	2914		4.08856	0.924275	0.873658		0.491484	0.763139	0	1	Ⅲ类 低资源-高产业型
495	681	河南省	郑州市	郑州市	郑州市	荥阳市	忆江南滑雪场(暂停开放)	[]	待识别	待划分	滑雪+度假综合型	GaodeAPI_text(滑雪场)	113.483	34.9089	B0JKLU4ZKU	郑州市	低海拔人工造雪型	3	0	-0.434867	0	0.565664	0.226266	Ⅲ 中等	145321000	1401.1	1300.8	2.99446	0.269479	0.42007	0.607765	0.357884	0.413799	0	1	Ⅲ类 低资源-高产业型
496	203	天津市	天津市	天津市	天津市	武清区	snow way滑雪运动空间(中体店)	东蒲洼街翠通路2号体育中心B馆101室	待识别	待划分	城郊体验型	GaodeAPI_text(滑雪场)	117.012	39.3896	B0H1VHROND	天津市	低海拔人工造雪型	3	0	-0.44126	0	0.565867	0.226347	Ⅲ 中等	180243200	0		2.77744	0.334237	0		0.331384	0.221874	1	1	Ⅰ类 高资源-高产业型
497	357	山西省	晋中市	晋中市	晋中市	榆次区	山西五龙国际滑雪场	民航街40号	待识别	待划分	城郊体验型	GaodeAPI_text(滑雪场)	112.674	37.7872	B015F0IW7V	晋中市	低海拔人工造雪型	3	0.025	-0.472592	0.00234592	0.566862	0.228152	Ⅲ 中等	24588000	407.9	337.65	0.682164	0.0455952	0.122294	0.157758	0.0755305	0.100295	1	0	Ⅱ类 高资源-低产业型
498	263	山东省	泰安市	泰安市	泰安市	肥城市	泰西雪山峪滑雪场(暂停营业)	仪阳街道仪阳乡三环村原小学校院11号	待识别	待划分	城郊体验型	GaodeAPI_text(滑雪场)	116.829	36.0964	B0FFK48ZL3	泰安市	低海拔人工造雪型	3	0.0477273	-0.518689	0.00447857	0.568325	0.230017	Ⅲ 中等	36221000	482.1	534.87	1.54469	0.0671671	0.14454	0.249904	0.180853	0.160616	1	1	Ⅰ类 高资源-高产业型
499	571	河北省	张家口市	张家口市	张家口市	崇礼区	密苑太子滑雪小镇	四台嘴乡梧桐大道太子滑雪小镇5栋1楼108室,中国	待识别	待划分	滑雪+度假综合型	GaodeAPI_text(滑雪度假区)	115.439	40.9374	B0FFM15DR9	张家口市	低海拔人工造雪型	3	0.752273	-0.522497	0.0705907	0.568446	0.269733	Ⅳ 较高	19133000	213.58	405.01	1.00065	0.0354796	0.0640343	0.18923	0.11442	0.100791	1	0	Ⅱ类 高资源-低产业型
500	77	北京市	北京市	北京市	北京市	平谷区	北京渔阳国际滑雪场(暂停营业)	东高村镇大旺务村东688号	待识别	待划分	城郊体验型	GaodeAPI_text(滑雪场)	117.148	40.0772	B000A7ZMPK	北京市	低海拔人工造雪型	3	0	-0.524128	0	0.568498	0.227399	Ⅲ 中等	498431000	2914		4.08856	0.924275	0.873658		0.491484	0.763139	1	1	Ⅰ类 高资源-高产业型
501	328	山东省	青岛市	青岛市	青岛市	黄岛区	月季山滑雪场(暂停营业)	大下庄村	待识别	待划分	城郊体验型	GaodeAPI_text(滑雪场)	119.877	35.9238	B0FFHDSTZ4	青岛市	低海拔人工造雪型	3	0	-0.524954	0	0.568524	0.22741	Ⅲ 中等	167194600	1019.3	1037.15	2.35537	0.31004	0.305601	0.484582	0.279845	0.345017	1	1	Ⅰ类 高资源-高产业型
502	127	吉林省	吉林市	吉林市	吉林市	磐石市	吉林磐石莲花山滑雪场	烟筒山镇	待识别	待划分	滑雪+度假综合型	GaodeAPI_text(滑雪场)	126.215	43.1931	B01B00PI3A	吉林市	低海拔人工造雪型	3	0	-0.529041	0	0.568654	0.227461	Ⅲ 中等	16332300	547.2	352.81	0.534725	0.0302861	0.164058	0.164841	0.0575268	0.104178	1	0	Ⅱ类 高资源-低产业型
503	368	山西省	朔州市	朔州市	朔州市	怀仁市	壬山滑雪场(暂停营业)	怀玉东街北坛公园向东300米	待识别	待划分	城郊体验型	GaodeAPI_text(滑雪场)	113.137	39.8526	B0FFIHKMDA	朔州市	低海拔人工造雪型	3	0.254545	-0.589987	0.0238857	0.570588	0.242567	Ⅲ 中等	13285000	0	157.9	0.648392	0.0246353	0	0.0737747	0.0714066	0.0424541	1	0	Ⅱ类 高资源-低产业型
504	607	河北省	秦皇岛市	秦皇岛市	秦皇岛市	海港区	紫云山滑雪场(暂停营业)	北港镇陈庄村(民族路口)	待识别	待划分	城郊体验型	GaodeAPI_text(滑雪场)	119.6	40.0227	B014F05HWT	秦皇岛市	低海拔人工造雪型	3	0	-0.605961	0	0.571095	0.228438	Ⅲ 中等	2.12856e+07	268.57	310.74	0.78704	0.0394713	0.0805211	0.145185	0.0883368	0.0883786	1	0	Ⅱ类 高资源-低产业型
505	837	陕西省	榆林市	榆林市	榆林市	定边县	龙泉山冰雪乐园(暂停开放)	陕西省榆林市定边县盐场堡镇贾圈村南	室内	待划分	城市综合体室内雪场型	GaodeAPI_text(冰雪乐园)	107.62	37.67	B0K6C52SEZ	榆林市	低海拔人工造雪型	3	0	-0.613209	0	0.571325	0.22853	Ⅲ 中等	75486800	103.37	360.73	0.440279	0.13998	0.0309918	0.168542	0.045994	0.096377	1	0	Ⅱ类 高资源-低产业型
506	367	山西省	朔州市	朔州市	朔州市	山阴县	广武国际滑雪场	广武镇新广武村东500米	待识别	待划分	城郊体验型	GaodeAPI_text(滑雪场)	112.816	39.2342	B0I3OZ4GAV	朔州市	低海拔人工造雪型	3	0.254545	-0.622663	0.0238857	0.571625	0.242982	Ⅲ 中等	13285000	0	157.9	0.648392	0.0246353	0	0.0737747	0.0714066	0.0424541	1	0	Ⅱ类 高资源-低产业型
507	729	甘肃省	临夏回族自治州	临夏回族自治州	临夏回族自治州	和政县	松鸣岩国际滑雪场	松鸣镇松鸣岩景区	待识别	待划分	城郊体验型	GaodeAPI_text(滑雪场)	103.407	35.2651	B0FFG9W4R1	临夏回族自治州	低海拔人工造雪型	3	0.772727	-0.629681	0.0725101	0.571848	0.272245	Ⅳ 较高			210.11	1.25903			0.0981685	0.145971	0.12207	1	0	Ⅱ类 高资源-低产业型
508	241	山东省	威海市	威海市	威海市	乳山市	银滩大拇指广场滑雪场	长江路银滩滨海旅游度假区内(东侧)	待识别	待划分	城郊体验型	GaodeAPI_text(滑雪场)	121.703	36.8266	B0J6PZYWJ0	威海市	低海拔人工造雪型	3	0	-0.630961	0	0.571889	0.228755	Ⅲ 中等	37286200	393.1	291.36	1.60219	0.0691424	0.117857	0.13613	0.187875	0.127751	1	0	Ⅱ类 高资源-低产业型
509	248	山东省	德州市	德州市	德州市	宁津县	德州国际滑雪场(暂停营业)	津城街道宁城街道西弭家河村	待识别	待划分	城郊体验型	GaodeAPI_text(滑雪场)	116.802	37.5854	B0HKZ5T9N3	德州市	低海拔人工造雪型	3	0.00227273	-0.644179	0.000213265	0.572308	0.229051	Ⅲ 中等	40477300	0	553.63	1.30746	0.0750598	0	0.258669	0.151885	0.121404	1	0	Ⅱ类 高资源-低产业型
510	637	河南省	三门峡市	三门峡市	三门峡市	陕州区	甘山森林滑雪场(暂停营业)	西张村镇窑店村甘山国家森林公园1号	待识别	待划分	城郊体验型	GaodeAPI_text(滑雪场)	111.206	34.4993	B0KK2SESFM	三门峡市	低海拔人工造雪型	3	0.025	-0.644314	0.00234592	0.572313	0.230333	Ⅲ 中等	16186900	195.1	202	0.570534	0.0300165	0.0584937	0.0943793	0.0618994	0.0611972	1	0	Ⅱ类 高资源-低产业型
511	642	河南省	商丘市	商丘市	商丘市	梁园区	黄河故道冰雪大世界(暂停开放)	刘口镇张彭村黄河故道薰衣草庄园2号	待识别	待划分	城市综合体室内雪场型	GaodeAPI_text(冰雪乐园)	115.743	34.5871	B0L6NLA9NA	商丘市	低海拔人工造雪型	3	0.109091	-0.646326	0.0102367	0.572376	0.235093	Ⅲ 中等	32722700	49.34	766.02	0.934367	0.0606799	0.0147928	0.357903	0.106327	0.134926	1	0	Ⅱ类 高资源-低产业型
512	842	陕西省	榆林市	榆林市	榆林市	榆阳区	榆溪滑雪场(暂停营业)	校场东路与金沙路交叉口向东200米	待识别	待划分	城郊体验型	GaodeAPI_text(滑雪场)	109.777	38.2766	B0FFK1976Z	榆林市	低海拔人工造雪型	3	0	-0.652802	0	0.572582	0.229033	Ⅲ 中等	75486800	103.37	360.73	0.440279	0.13998	0.0309918	0.168542	0.045994	0.096377	1	0	Ⅱ类 高资源-低产业型
513	299	山东省	滨州市	滨州市	滨州市	邹平市	邹平蝴蝶谷滑雪场(暂停营业)	西董街道办事处醴泉五路蝴蝶欢乐谷内	待识别	待划分	城郊体验型	GaodeAPI_text(滑雪场)	117.752	36.7877	B0I3O55BIJ	滨州市	低海拔人工造雪型	3	0.0454545	-0.658966	0.0042653	0.572778	0.23167	Ⅲ 中等	34047400	93	390.41	1.1048	0.0631364	0.0278827	0.182409	0.127139	0.100142	1	0	Ⅱ类 高资源-低产业型
514	49	内蒙古自治区	呼和浩特市	呼和浩特市	呼和浩特市	赛罕区	呼和浩特欢乐冰雪节	大黑河军事文化乐园	待识别	待划分	城市综合体室内雪场型	GaodeAPI_text(冰雪世界)	111.813	40.7672	B0KB699TI9	呼和浩特市	低海拔人工造雪型	3	1.22955	-0.660905	0.115376	0.572839	0.298362	Ⅳ 较高	41070800	419.64	360.41	0.609106	0.0761604	0.125814	0.168392	0.0666094	0.109244	1	0	Ⅱ类 高资源-低产业型
515	197	天津市	天津市	天津市	天津市	北辰区	郊野公园津辰国际滑雪场	天津市大张庄镇北辰郊野公园津武路东侧	待识别	待划分	城郊体验型	GaodeAPI_text(滑雪场)	117.164	39.2752	B0IKVMDNPG	天津市	低海拔人工造雪型	3	0	-0.691516	0	0.573811	0.229524	Ⅲ 中等	180243200	0		2.77744	0.334237	0		0.331384	0.221874	1	1	Ⅰ类 高资源-高产业型
516	121	北京市	北京市	北京市	北京市	顺义区	北京莲花山滑雪场(暂停营业)	张镇良山东路288号(近顺平公路)	待识别	待划分	城郊体验型	GaodeAPI_text(滑雪场)	116.93	40.138	B000A7ZRSM	北京市	低海拔人工造雪型	3	0	-0.717533	0	0.574637	0.229855	Ⅲ 中等	498431000	2914		4.08856	0.924275	0.873658		0.491484	0.763139	1	1	Ⅰ类 高资源-高产业型
517	304	山东省	潍坊市	潍坊市	潍坊市	青州市	云门山四季滑雪场(暂停营业)	弥河镇大马山路	待识别	待划分	城郊体验型	GaodeAPI_text(滑雪场)	118.518	36.5884	B0FFIBGV44	潍坊市	低海拔人工造雪型	3	0.131818	-0.755823	0.0123694	0.575852	0.237762	Ⅲ 中等	82032000	509	936.95	2.20289	0.152118	0.152605	0.437766	0.261226	0.250929	1	1	Ⅰ类 高资源-高产业型
518	549	河北省	唐山市	唐山市	唐山市	滦州市	滦州研山滑雪场	响嘡街道研山文峰宝塔景区南50米	待识别	待划分	城郊体验型	GaodeAPI_text(滑雪场)	118.764	39.6988	B0FFGJDKXN	唐山市	低海拔人工造雪型	3	0	-0.775345	0	0.576472	0.230589	Ⅲ 中等	100039000	446.97	771.95	1.98314	0.185509	0.134008	0.360674	0.234392	0.228646	1	1	Ⅰ类 高资源-高产业型
519	535	河北省	保定市	保定市	保定市	易县	狼牙山滑雪场(暂停营业)	于家庄村南300米	待识别	待划分	城郊体验型	GaodeAPI_text(滑雪场)	115.259	39.129	B01380SG02	保定市	低海拔人工造雪型	3	0.00454545	-0.814109	0.00042653	0.577702	0.231337	Ⅲ 中等	47733000	684.19	909.89	1.29013	0.0885146	0.20513	0.425123	0.149769	0.217134	1	1	Ⅰ类 高资源-高产业型
520	329	山东省	青岛市	青岛市	青岛市	黄岛区	青岛融创藏马山滑雪场	藏南镇曾家官庄村2664号(藏马山景区内)	待识别	待划分	城郊体验型	GaodeAPI_text(滑雪场)	119.785	35.7994	B0FFGH97GS	青岛市	低海拔人工造雪型	3	0	-0.831814	0	0.578264	0.231306	Ⅲ 中等	167194600	1019.3	1037.15	2.35537	0.31004	0.305601	0.484582	0.279845	0.345017	1	1	Ⅰ类 高资源-高产业型
521	202	天津市	天津市	天津市	天津市	武清区	GO SNOW 滑雪俱乐部	来源道8号初实产业园内	待识别	待划分	城郊体验型	GaodeAPI_text(滑雪场)	117.05	39.3921	B0L15A04W7	天津市	低海拔人工造雪型	3	0	-0.849477	0	0.578825	0.23153	Ⅲ 中等	180243200	0		2.77744	0.334237	0		0.331384	0.221874	1	1	Ⅰ类 高资源-高产业型
522	296	山东省	滨州市	滨州市	滨州市	滨城区	滨州滑雪场	新五路94号	待识别	待划分	城郊体验型	GaodeAPI_text(滑雪场)	118.056	37.2843	B0KKVA3127	滨州市	低海拔人工造雪型	3	0.0454545	-0.888946	0.0042653	0.580078	0.23459	Ⅲ 中等	34047400	93	390.41	1.1048	0.0631364	0.0278827	0.182409	0.127139	0.100142	1	0	Ⅱ类 高资源-低产业型
523	335	山西省	临汾市	临汾市	临汾市	霍州市	七里峪滑雪场(暂停营业)	七里峪风景区入口北50米	待识别	待划分	城郊体验型	GaodeAPI_text(滑雪场)	111.905	36.6082	B0FFGJ2S3Z	临汾市	低海拔人工造雪型	3	0.0409091	-0.909719	0.00383877	0.580737	0.234598	Ⅲ 中等	24387000	301.21	388.72	0.531624	0.0452225	0.090307	0.181619	0.0571481	0.0935743	1	0	Ⅱ类 高资源-低产业型
524	553	河北省	唐山市	唐山市	唐山市	迁安市	瑞美滑雪场	栾河文化产业园区黄台湖10号岛	待识别	待划分	城郊体验型	GaodeAPI_text(滑雪场)	118.673	39.9902	B0L6BPXVAG	唐山市	低海拔人工造雪型	3	0	-0.93721	0	0.58161	0.232644	Ⅲ 中等	100039000	446.97	771.95	1.98314	0.185509	0.134008	0.360674	0.234392	0.228646	1	1	Ⅰ类 高资源-高产业型
525	194	天津市	天津市	天津市	天津市	北辰区	刘家码头北辰滑雪场(暂停营业)	青光镇刘家码头村委会南800米	待识别	待划分	城郊体验型	GaodeAPI_text(滑雪场)	117.089	39.179	B0FFK6S9L3	天津市	低海拔人工造雪型	3	0	-0.94934	0	0.581995	0.232798	Ⅲ 中等	180243200	0		2.77744	0.334237	0		0.331384	0.221874	1	1	Ⅰ类 高资源-高产业型
526	352	山西省	晋中市	晋中市	晋中市	介休市	介休市冰雪大世界	联华职中北700米	待识别	待划分	城市综合体室内雪场型	GaodeAPI_text(华发冰雪世界)	111.92	37.0697	B0L6SA360O	晋中市	低海拔人工造雪型	3	0.025	-0.958202	0.00234592	0.582276	0.234318	Ⅲ 中等	24588000	407.9	337.65	0.682164	0.0455952	0.122294	0.157758	0.0755305	0.100295	1	0	Ⅱ类 高资源-低产业型
527	36	内蒙古自治区	包头市	包头市	包头市	九原区	包头市健锡滑雪场(体育发展中心)(暂停营业)	沼潭南路(火车站东立交桥南700处路西)	待识别	待划分	城郊体验型	GaodeAPI_text(滑雪中心)	109.839	40.5951	B0FFIK23Z8	包头市	低海拔人工造雪型	3	0	-0.978594	0	0.582923	0.233169	Ⅲ 中等	45750600	234.9	276.17	0.360691	0.0848385	0.0704263	0.129033	0.0362756	0.0801434	1	0	Ⅱ类 高资源-低产业型
528	627	河北省	邯郸市	邯郸市	邯郸市	武安市	七步沟景区滑雪场(暂停营业)	活水乡七步沟村	待识别	待划分	滑雪+度假综合型	GaodeAPI_text(滑雪场)	113.876	36.9336	B01360NCWA	邯郸市	低海拔人工造雪型	3	0	-0.982518	0	0.583048	0.233219	Ⅲ 中等	47043000	420.43	917.31	2.17237	0.0872351	0.126051	0.428589	0.257499	0.224844	1	1	Ⅰ类 高资源-高产业型
529	199	天津市	天津市	天津市	天津市	南开区	Snow Way滑雪运动空间(鲁能店)	鲁能城负一层(天塔地铁站E1口步行290米)	待识别	待划分	城郊体验型	GaodeAPI_text(滑雪场)	117.178	39.0938	B0H2NUFTKP	天津市	低海拔人工造雪型	3	0	-0.995063	0	0.583446	0.233378	Ⅲ 中等	180243200	0		2.77744	0.334237	0		0.331384	0.221874	1	1	Ⅰ类 高资源-高产业型
530	427	新疆维吾尔自治区	乌鲁木齐市	乌鲁木齐市	乌鲁木齐市	乌鲁木齐县	银峰滑雪场	水西沟镇南溪南路水西沟镇中心十字路口左转300米上行	待识别	待划分	城郊体验型	GaodeAPI_text(滑雪场)	87.4799	43.444	B03DF0T12V	乌鲁木齐市	低海拔人工造雪型	3	3.17045	-1.0092	0.297505	0.583895	0.412061	Ⅴ 很高	45021600	479.18	408.48	0.766738	0.0834866	0.143665	0.190852	0.0858578	0.125965	1	0	Ⅱ类 高资源-低产业型
531	83	北京市	北京市	北京市	北京市	房山区	云居滑雪场(暂停营业)	张坊镇蔡家口村1号	待识别	待划分	城郊体验型	GaodeAPI_text(滑雪场)	115.772	39.5981	B000A7R6QV	北京市	低海拔人工造雪型	3	0	-1.03212	0	0.584623	0.233849	Ⅲ 中等	498431000	2914		4.08856	0.924275	0.873658		0.491484	0.763139	1	1	Ⅰ类 高资源-高产业型
532	593	河北省	石家庄市	石家庄市	石家庄市	元氏县	无极山滑雪场(暂停营业)	苏村乡孔村(岳庄庄西侧)	待识别	待划分	城郊体验型	GaodeAPI_text(滑雪场)	114.327	37.775	B0FFJPZO9Z	石家庄市	低海拔人工造雪型	3	0.00681818	-1.06069	0.000639795	0.585529	0.234596	Ⅲ 中等	82034000	684.2	1123.35	2.03768	0.152121	0.205133	0.524856	0.241052	0.280791	1	1	Ⅰ类 高资源-高产业型
533	196	天津市	天津市	天津市	天津市	北辰区	普济山河滑雪场(暂停营业)	长江路与七彩大道交叉口东北380米	待识别	待划分	城郊体验型	GaodeAPI_text(滑雪场)	117.239	39.2226	B0J66MVUF4	天津市	低海拔人工造雪型	3	0	-1.06954	0	0.58581	0.234324	Ⅲ 中等	180243200	0		2.77744	0.334237	0		0.331384	0.221874	1	1	Ⅰ类 高资源-高产业型
534	295	山东省	滨州市	滨州市	滨州市	沾化区	沾化七星雪滑雪场(暂停营业)	金海五路166号	待识别	待划分	城郊体验型	GaodeAPI_text(滑雪场)	118.071	37.7172	B0KK6CR0AG	滨州市	低海拔人工造雪型	3	0.0454545	-1.0771	0.0042653	0.58605	0.236979	Ⅲ 中等	34047400	93	390.41	1.1048	0.0631364	0.0278827	0.182409	0.127139	0.100142	1	0	Ⅱ类 高资源-低产业型
535	613	河北省	邢台市	邢台市	邢台市	信都区	天河山冰雪大世界	天河山旅游区中国爱情山顶	待识别	待划分	城市综合体室内雪场型	GaodeAPI_text(冰雪世界)	113.799	37.0944	B0FFGG84BN	邢台市	低海拔人工造雪型	3	0.00909091	-1.09066	0.00085306	0.586481	0.235104	Ⅲ 中等	27659000	191.23	695.55	2.06729	0.05129	0.0573335	0.324978	0.244667	0.169567	1	1	Ⅰ类 高资源-高产业型
536	311	山东省	烟台市	烟台市	烟台市	芝罘区	烟台勃朗滑雪场(暂停营业)	山东省烟台市芝罘区机场路99号	待识别	待划分	城郊体验型	GaodeAPI_text(滑雪场)	121.35	37.5139	B0FFFQ0IIC	烟台市	低海拔人工造雪型	3	0	-1.09538	0	0.58663	0.234652	Ⅲ 中等	107828300	624.4	703.22	2.95762	0.199953	0.187204	0.328561	0.353386	0.267276	1	1	Ⅰ类 高资源-高产业型
537	534	河北省	保定市	保定市	保定市	徐水区	刘伶田园小镇滑雪场(暂停营业)	崔庄镇干河沟村徐新路南刘伶田园小镇	待识别	待划分	城郊体验型	GaodeAPI_text(滑雪场)	115.735	38.984	B0FFLID1T6	保定市	低海拔人工造雪型	3	0.00454545	-1.10973	0.00042653	0.587086	0.23509	Ⅲ 中等	47733000	684.19	909.89	1.29013	0.0885146	0.20513	0.425123	0.149769	0.217134	1	1	Ⅰ类 高资源-高产业型
538	569	河北省	张家口市	张家口市	张家口市	崇礼区	太舞滑雪场	营岔村以北	待识别	待划分	城郊体验型	GaodeAPI_text(滑雪场)	115.447	40.8811	B0FFG8OCON	张家口市	低海拔人工造雪型	3	0.752273	-1.13313	0.0705907	0.587829	0.277486	Ⅳ 较高	19133000	213.58	405.01	1.00065	0.0354796	0.0640343	0.18923	0.11442	0.100791	1	0	Ⅱ类 高资源-低产业型
539	650	河南省	新乡市	新乡市	新乡市	辉县市	五龙山滑雪场	响水河游乐园	待识别	待划分	城郊体验型	GaodeAPI_text(滑雪场)	113.87	35.4983	B0FFF33TD6	新乡市	低海拔人工造雪型	3	0.00681818	-1.14476	0.000639795	0.588198	0.235663	Ⅲ 中等	35697000	222.31	612.5	2.56387	0.0661954	0.0666517	0.286175	0.305305	0.181082	1	1	Ⅰ类 高资源-高产业型
540	542	河北省	保定市	保定市	保定市	满城区	神湖四季冰雪戏雪中心	神星镇荆山村东	待识别	待划分	城郊体验型	GaodeAPI_text(滑雪场)	115.3	39.0226	B0FFGDKX2I	保定市	低海拔人工造雪型	3	0.00454545	-1.14513	0.00042653	0.58821	0.23554	Ⅲ 中等	47733000	684.19	909.89	1.29013	0.0885146	0.20513	0.425123	0.149769	0.217134	1	1	Ⅰ类 高资源-高产业型
541	337	山西省	吕梁市	吕梁市	吕梁市	汾阳市	龙泉山水源滑雪场(暂停营业)	峪道河镇金庄马刨神泉度假区	待识别	待划分	城郊体验型	GaodeAPI_text(滑雪场)	111.749	37.3881	B0FFGDRR0U	吕梁市	低海拔人工造雪型	3	0.422727	-1.15588	0.0396673	0.588551	0.259221	Ⅳ 较高	26432400	232.84	334.65	0.428771	0.0490154	0.0698087	0.156357	0.0445888	0.0799424	1	0	Ⅱ类 高资源-低产业型
542	278	山东省	济南市	济南市	济南市	章丘区	济南紫缘香草园滑雪场(暂停营业)	世纪大道	待识别	待划分	城郊体验型	GaodeAPI_text(滑雪场)	117.387	36.698	B0FFFPM4A8	济南市	低海拔人工造雪型	3	0.0954545	-1.15726	0.00895713	0.588595	0.240812	Ⅲ 中等	135276000	702.8	943.7	2.22687	0.250852	0.210709	0.440919	0.264154	0.291659	1	1	Ⅰ类 高资源-高产业型
543	70	北京市	北京市	北京市	北京市	大兴区	斯巴达滑雪(亦庄店)	龙湖天街亦庄店5层博纳国际影城旁边	待识别	待划分	城郊体验型	GaodeAPI_text(滑雪场)	116.493	39.7528	B0JRGU4QIG	北京市	低海拔人工造雪型	3	0	-1.15921	0	0.588656	0.235463	Ⅲ 中等	498431000	2914		4.08856	0.924275	0.873658		0.491484	0.763139	1	1	Ⅰ类 高资源-高产业型
544	219	宁夏回族自治区	银川市	银川市	银川市	兴庆区	银川鸣翠湖滑雪场	掌政镇鸣翠湖国家湿地公园内	待识别	待划分	城郊体验型	GaodeAPI_text(滑雪场)	106.369	38.3956	B0FFFQ25FB	银川市	低海拔人工造雪型	3	0	-1.16174	0	0.588737	0.235495	Ⅲ 中等	29395300	0	290.81	1.21049	0.0545097	0	0.135873	0.140044	0.0826067	1	0	Ⅱ类 高资源-低产业型
545	210	天津市	天津市	天津市	天津市	蓟州区	蓟州国际滑雪场	罗庄子镇洪水庄村西蓟洲国际旅游度假村	待识别	待划分	城郊体验型	GaodeAPI_text(滑雪场)	117.381	40.1122	B00160F67W	天津市	低海拔人工造雪型	3	0	-1.16867	0	0.588957	0.235583	Ⅲ 中等	180243200	0		2.77744	0.334237	0		0.331384	0.221874	1	1	Ⅰ类 高资源-高产业型
546	209	天津市	天津市	天津市	天津市	蓟州区	玉龙滑雪场(暂停营业)	罗庄子镇洪水庄村	待识别	待划分	城郊体验型	GaodeAPI_text(滑雪场)	117.392	40.1099	B00160AQVW	天津市	低海拔人工造雪型	3	0	-1.16918	0	0.588973	0.235589	Ⅲ 中等	180243200	0		2.77744	0.334237	0		0.331384	0.221874	1	1	Ⅰ类 高资源-高产业型
547	208	天津市	天津市	天津市	天津市	蓟州区	安达部落青少年滑雪运动基地	洪骆路137号	待识别	待划分	城郊体验型	GaodeAPI_text(滑雪基地)	117.381	40.1147	B0L1OHOGFT	天津市	低海拔人工造雪型	3	0	-1.17088	0	0.589027	0.235611	Ⅲ 中等	180243200	0		2.77744	0.334237	0		0.331384	0.221874	1	1	Ⅰ类 高资源-高产业型
548	200	天津市	天津市	天津市	天津市	南开区	南翠屏公园滑雪场(暂停营业)	南翠屏公园(南翠屏地铁站D口步行350米)	待识别	待划分	城郊体验型	GaodeAPI_text(滑雪场)	117.157	39.0776	B001614SR6	天津市	低海拔人工造雪型	3	0	-1.1719	0	0.58906	0.235624	Ⅲ 中等	180243200	0		2.77744	0.334237	0		0.331384	0.221874	1	1	Ⅰ类 高资源-高产业型
549	645	河南省	安阳市	安阳市	安阳市	龙安区	安阳市土生园龙安滑雪场	马投涧水涧村	待识别	待划分	城郊体验型	GaodeAPI_text(滑雪场)	114.261	36.0244	B0FFGEV3NM	安阳市	低海拔人工造雪型	3	0.0295455	-1.18142	0.00277245	0.589362	0.237408	Ⅲ 中等	26720600	361.23	537.6	2.21085	0.0495498	0.108302	0.25118	0.262197	0.167807	1	1	Ⅰ类 高资源-高产业型
550	72	北京市	北京市	北京市	北京市	大兴区	越雪奇迹·雪乐山室内滑雪亦庄华联店	宏达北路甲5号	室内	待划分	城市综合体室内雪场型	GaodeAPI_text(雪乐山)	116.502	39.8054	B0KK61JZZI	北京市	低海拔人工造雪型	3	0	-1.20598	0	0.590141	0.236057	Ⅲ 中等	498431000	2914		4.08856	0.924275	0.873658		0.491484	0.763139	1	1	Ⅰ类 高资源-高产业型
551	266	山东省	济南市	济南市	济南市	历下区	爱飞驰城市滑雪空间(恒隆店)	泉城路188号济南恒隆广场西翼F5层551、552	待识别	待划分	城市综合体室内雪场型	GaodeAPI_text(滑雪场)	117.023	36.6645	B0G3JK2UZW	济南市	低海拔人工造雪型	3	0.0954545	-1.2135	0.00895713	0.59038	0.241526	Ⅲ 中等	135276000	702.8	943.7	2.22687	0.250852	0.210709	0.440919	0.264154	0.291659	1	1	Ⅰ类 高资源-高产业型
552	848	陕西省	榆林市	榆林市	榆林市	神木市	泥河滑雪场	泥河村	待识别	待划分	城郊体验型	GaodeAPI_text(滑雪场)	110.49	38.8869	B0IGUCY9GU	榆林市	低海拔人工造雪型	3	0	-1.21942	0	0.590568	0.236227	Ⅲ 中等	75486800	103.37	360.73	0.440279	0.13998	0.0309918	0.168542	0.045994	0.096377	1	0	Ⅱ类 高资源-低产业型
553	359	山西省	晋中市	晋中市	晋中市	灵石县	石膏山景区滑雪场(暂停营业)	石膏山风景名胜区售票处北侧	待识别	待划分	滑雪+度假综合型	GaodeAPI_text(滑雪场)	111.908	36.735	B0IKVAAOD3	晋中市	低海拔人工造雪型	3	0.025	-1.23183	0.00234592	0.590962	0.237792	Ⅲ 中等	24588000	407.9	337.65	0.682164	0.0455952	0.122294	0.157758	0.0755305	0.100295	1	0	Ⅱ类 高资源-低产业型
554	348	山西省	太原市	太原市	太原市	杏花岭区	采薇庄园滑雪场	小返乡水沟村柳林掌	待识别	待划分	城郊体验型	GaodeAPI_text(滑雪场)	112.623	37.9433	B0FFF00PVS	太原市	低海拔人工造雪型	3	0.170455	-1.2322	0.0159949	0.590973	0.245986	Ⅳ 较高	54188700	354.69	0	1.52342	0.100486	0.106341	0	0.178256	0.0962706	1	0	Ⅱ类 高资源-低产业型
555	347	山西省	太原市	太原市	太原市	万柏林区	雪乐山室内滑雪(滨和运动主题馆店)	环网西巷滨和运动主题馆	室内	待划分	城市综合体室内雪场型	GaodeAPI_text(滑雪场)	112.528	37.879	B0GKXZE9LL	太原市	低海拔人工造雪型	3	0.170455	-1.24736	0.0159949	0.591455	0.246179	Ⅳ 较高	54188700	354.69	0	1.52342	0.100486	0.106341	0	0.178256	0.0962706	1	0	Ⅱ类 高资源-低产业型
556	584	河北省	承德市	承德市	承德市	滦平县	金山岭银河滑雪场	长山峪镇大雁子沟	待识别	待划分	城郊体验型	GaodeAPI_text(滑雪场)	117.487	40.7904	B0I63UYRG1	承德市	低海拔人工造雪型	3	0	-1.25382	0	0.59166	0.236664	Ⅲ 中等	19626000	300.48	330.22	0.366635	0.0363938	0.0900881	0.154287	0.0370014	0.0794425	1	0	Ⅱ类 高资源-低产业型
557	606	河北省	秦皇岛市	秦皇岛市	秦皇岛市	海港区	秦皇岛基地技巧滑雪夏训场	岭前街与文涛路交叉口东60米	待识别	待划分	城郊体验型	GaodeAPI_text(滑雪场)	119.565	39.9132	B0JAOAYAOC	秦皇岛市	低海拔人工造雪型	3	0	-1.26904	0	0.592143	0.236857	Ⅲ 中等	2.12856e+07	268.57	310.74	0.78704	0.0394713	0.0805211	0.145185	0.0883368	0.0883786	1	0	Ⅱ类 高资源-低产业型
558	107	北京市	北京市	北京市	北京市	朝阳区	鸟巢冰雪欢乐季(暂停营业)	国家体育场南路1号(奥林匹克公园内)	待识别	待划分	城郊体验型	GaodeAPI_text(滑雪场)	116.396	39.9929	B000A8VNMZ	北京市	低海拔人工造雪型	3	0	-1.28568	0	0.592671	0.237068	Ⅲ 中等	498431000	2914		4.08856	0.924275	0.873658		0.491484	0.763139	1	1	Ⅰ类 高资源-高产业型
559	231	山东省	东营市	东营市	东营市	东营区	万象滑雪场	万象游乐园	待识别	待划分	城郊体验型	GaodeAPI_text(滑雪场)	118.599	37.4508	B0FFFQ06Y7	东营市	低海拔人工造雪型	3	0	-1.28732	0	0.592723	0.237089	Ⅲ 中等	43077000	120.7	220.6	1.13672	0.0798806	0.0361876	0.10307	0.131036	0.0875434	1	0	Ⅱ类 高资源-低产业型
560	342	山西省	大同市	大同市	大同市	平城区	七星雪魏都滑雪场(暂停营业)	御河街道魏都大道南端魏都水世界(东南角)	待识别	待划分	城郊体验型	GaodeAPI_text(滑雪场)	113.296	40.018	B0FFK65O0B	大同市	低海拔人工造雪型	3	0.165909	-1.28998	0.0155684	0.592808	0.246464	Ⅳ 较高	18024800	290.9	307.9	0.691564	0.0334246	0.0872159	0.143858	0.0766783	0.0852943	1	0	Ⅱ类 高资源-低产业型
561	91	北京市	北京市	北京市	北京市	昌平区	北京静之湖滑雪场	兴寿镇桃峪口村	待识别	待划分	城郊体验型	GaodeAPI_text(滑雪场)	116.435	40.2504	B000A9DN6M	北京市	低海拔人工造雪型	3	0	-1.29379	0	0.592929	0.237171	Ⅲ 中等	498431000	2914		4.08856	0.924275	0.873658		0.491484	0.763139	1	1	Ⅰ类 高资源-高产业型
562	581	河北省	承德市	承德市	承德市	双桥区	承德元宝山滑雪场(暂停营业)	下店子村广仁岭山洞附近	待识别	待划分	城郊体验型	GaodeAPI_text(滑雪场)	117.867	40.9778	B013A0PW3V	承德市	低海拔人工造雪型	3	0	-1.30168	0	0.593179	0.237272	Ⅲ 中等	19626000	300.48	330.22	0.366635	0.0363938	0.0900881	0.154287	0.0370014	0.0794425	1	0	Ⅱ类 高资源-低产业型
563	793	辽宁省	沈阳市	沈阳市	沈阳市	苏家屯区	白清寨滑雪场	白清寨广福路69-1号	待识别	待划分	滑雪+度假综合型	GaodeAPI_text(滑雪场)	123.721	41.5756	B00180JCA2	沈阳市	低海拔人工造雪型	3	0.536364	-1.32498	0.0503306	0.593919	0.267766	Ⅳ 较高	90271000	502.6	920.4	1.1764	0.167396	0.150687	0.430033	0.135881	0.220999	1	1	Ⅰ类 高资源-高产业型
564	42	内蒙古自治区	呼和浩特市	呼和浩特市	呼和浩特市	回民区	Hopo Snow城市滑雪空间(呼和浩特店)	新华大街94号新华MALLB1层	待识别	待划分	城市综合体室内雪场型	GaodeAPI_text(滑雪场)	111.667	40.8188	B0JK39DLMO	呼和浩特市	低海拔人工造雪型	3	1.22955	-1.34362	0.115376	0.59451	0.30703	Ⅳ 较高	41070800	419.64	360.41	0.609106	0.0761604	0.125814	0.168392	0.0666094	0.109244	1	0	Ⅱ类 高资源-低产业型
565	60	北京市	北京市	北京市	北京市	东城区	雪乐山室内滑雪馆(崇文门店)	崇文门外大街18号国瑞城购物中心地下二层LG层-C6(15)号	室内	待划分	城市综合体室内雪场型	GaodeAPI_text(滑雪场)	116.42	39.898	B0FFHMR46T	北京市	低海拔人工造雪型	3	0	-1.34772	0	0.59464	0.237856	Ⅲ 中等	498431000	2914		4.08856	0.924275	0.873658		0.491484	0.763139	1	1	Ⅰ类 高资源-高产业型
566	781	辽宁省	朝阳市	朝阳市	朝阳市	凌源市	凌源万源滑雪场	万元店镇凌热线	待识别	待划分	滑雪+度假综合型	GaodeAPI_text(滑雪小镇)	119.391	41.3605	B0K6FAFXJU	朝阳市	低海拔人工造雪型	3	0.372727	-1.35214	0.0349755	0.594781	0.258898	Ⅳ 较高	11532000	0	278.8	0.391882	0.0213846	0	0.130262	0.0400843	0.0479327	1	0	Ⅱ类 高资源-低产业型
567	243	山东省	威海市	威海市	威海市	环翠区	威海地中海滑雪场	温泉镇小庄村峰山	待识别	待划分	城郊体验型	GaodeAPI_text(滑雪场)	122.151	37.3593	B0HK0HLGFE	威海市	低海拔人工造雪型	3	0	-1.36119	0	0.595068	0.238027	Ⅲ 中等	37286200	393.1	291.36	1.60219	0.0691424	0.117857	0.13613	0.187875	0.127751	1	0	Ⅱ类 高资源-低产业型
568	602	河北省	石家庄市	石家庄市	石家庄市	鹿泉区	西部长青滑雪场	西部长青森林康养城内(东北角)	待识别	待划分	城郊体验型	GaodeAPI_text(滑雪场)	114.299	38.0292	B0FFF00QHC	石家庄市	低海拔人工造雪型	3	0.00681818	-1.3857	0.000639795	0.595846	0.238722	Ⅲ 中等	82034000	684.2	1123.35	2.03768	0.152121	0.205133	0.524856	0.241052	0.280791	1	1	Ⅰ类 高资源-高产业型
569	117	北京市	北京市	北京市	北京市	通州区	雪乐山滑雪(首开通州万象汇店)	运河东大街51号首开通州万象汇L3层	室内	待划分	城市综合体室内雪场型	GaodeAPI_text(雪乐山)	116.735	39.9049	B0K2K1MOO2	北京市	低海拔人工造雪型	3	0	-1.41323	0	0.59672	0.238688	Ⅲ 中等	498431000	2914		4.08856	0.924275	0.873658		0.491484	0.763139	1	1	Ⅰ类 高资源-高产业型
570	794	辽宁省	辽阳市	辽阳市	辽阳市	弓长岭区	辽阳弓长岭温泉滑雪场(暂停营业)	汤河镇红花峪村	待识别	待划分	城郊体验型	GaodeAPI_text(滑雪场)	123.424	41.1318	B01A300200	辽阳市	低海拔人工造雪型	3	0.556818	-1.4281	0.0522499	0.597192	0.270227	Ⅳ 较高	9527000	120.4	153.2	0.650616	0.0176666	0.0360976	0.0715788	0.0716782	0.0492553	1	0	Ⅱ类 高资源-低产业型
571	557	河北省	廊坊市	廊坊市	廊坊市	固安县	固安大庙会冰雪乐园(暂停营业)	迎宾大道与新中西街交叉口福缘小区对面	室内	待划分	城市综合体室内雪场型	GaodeAPI_text(冰雪世界)	116.287	39.4392	B0K6GY1AQ9	廊坊市	低海拔人工造雪型	3	0	-1.43331	0	0.597357	0.238943	Ⅲ 中等	39046000	207.19	547.8	2.36175	0.0724057	0.0621185	0.255945	0.280624	0.167773	1	1	Ⅰ类 高资源-高产业型
572	598	河北省	石家庄市	石家庄市	石家庄市	正定县	正定热雪奇迹	车站西街48号	室内	待划分	城市综合体室内雪场型	GaodeAPI_text(冰雪乐园)	114.554	38.1686	B0LAG5AFDA	石家庄市	低海拔人工造雪型	3	0.00681818	-1.44369	0.000639795	0.597687	0.239459	Ⅲ 中等	82034000	684.2	1123.35	2.03768	0.152121	0.205133	0.524856	0.241052	0.280791	1	1	Ⅰ类 高资源-高产业型
573	371	山西省	朔州市	朔州市	朔州市	朔城区	南邢家河滑雪场	南邢家河村	待识别	待划分	城郊体验型	GaodeAPI_text(滑雪场)	112.447	39.295	B0FFFRGNAD	朔州市	低海拔人工造雪型	3	0.254545	-1.45445	0.0238857	0.598028	0.253543	Ⅳ 较高	13285000	0	157.9	0.648392	0.0246353	0	0.0737747	0.0714066	0.0424541	1	0	Ⅱ类 高资源-低产业型
574	98	北京市	北京市	北京市	北京市	朝阳区	北京亚布洛尼朝阳公园滑雪场(暂停营业)	朝阳公园万人广场(西北角)	待识别	待划分	城郊体验型	GaodeAPI_text(滑雪场)	116.483	39.9442	B0FFFLI9Y8	北京市	低海拔人工造雪型	3	0	-1.45868	0	0.598163	0.239265	Ⅲ 中等	498431000	2914		4.08856	0.924275	0.873658		0.491484	0.763139	1	1	Ⅰ类 高资源-高产业型
575	555	河北省	唐山市	唐山市	唐山市	遵化市	亚太雪世界滑雪场	028乡道亚太农业观光园对面	室内	待划分	城市综合体室内雪场型	GaodeAPI_text(滑雪场)	117.937	40.1154	B0FFGKE44W	唐山市	低海拔人工造雪型	3	0	-1.45929	0	0.598182	0.239273	Ⅲ 中等	100039000	446.97	771.95	1.98314	0.185509	0.134008	0.360674	0.234392	0.228646	1	1	Ⅰ类 高资源-高产业型
576	588	河北省	沧州市	沧州市	沧州市	肃宁县	窝北滑雪场	窝北镇窝北村信用社北100米	待识别	待划分	城郊体验型	GaodeAPI_text(滑雪场)	115.94	38.3721	B0J6KRDT1G	沧州市	低海拔人工造雪型	3	0.0204545	-1.49804	0.00191939	0.599412	0.240916	Ⅲ 中等	47228000	118.78	726.46	2.12456	0.0875781	0.0356119	0.33942	0.25166	0.178568	1	1	Ⅰ类 高资源-高产业型
577	678	河南省	郑州市	郑州市	郑州市	新密市	大周山滑雪场(暂停营业)	[]	待识别	待划分	城郊体验型	GaodeAPI_text(滑雪场)	113.389	34.61	B0K63ZTAUB	郑州市	低海拔人工造雪型	3	0	-1.50357	0	0.599587	0.239835	Ⅲ 中等	145321000	1401.1	1300.8	2.99446	0.269479	0.42007	0.607765	0.357884	0.413799	1	1	Ⅰ类 高资源-高产业型
578	370	山西省	朔州市	朔州市	朔州市	怀仁市	朔州清凉山滑雪场(暂停营业)	何家堡乡悟道村	待识别	待划分	城郊体验型	GaodeAPI_text(滑雪场)	113.001	39.8359	B0FFK4G9TP	朔州市	低海拔人工造雪型	3	0.254545	-1.50743	0.0238857	0.59971	0.254215	Ⅳ 较高	13285000	0	157.9	0.648392	0.0246353	0	0.0737747	0.0714066	0.0424541	1	0	Ⅱ类 高资源-低产业型
579	110	北京市	北京市	北京市	北京市	海淀区	小石头滑雪运动馆(田村馆)	砂石厂路小玩童教育园区内	待识别	待划分	城郊体验型	GaodeAPI_text(滑雪场)	116.237	39.9232	B0I1FHMGCV	北京市	低海拔人工造雪型	3	0	-1.5173	0	0.600023	0.240009	Ⅲ 中等	498431000	2914		4.08856	0.924275	0.873658		0.491484	0.763139	1	1	Ⅰ类 高资源-高产业型
580	137	吉林省	延边朝鲜族自治州	延边朝鲜族自治州	延边朝鲜族自治州	延吉市	国宝室内滑雪场	延边朝鲜族自治州延吉市延川南街与天池路交叉口西南200米	室内	待划分	城市综合体室内雪场型	GaodeAPI_text(滑雪场)	129.423	42.8915	B0JBPS4KXX	延边朝鲜族自治州	低海拔人工造雪型	3	2.43864	-1.54467	0.228833	0.600892	0.377657	Ⅴ 很高			189.49	0.296596			0.0885343	0.028449	0.0584916	1	0	Ⅱ类 高资源-低产业型
581	847	陕西省	榆林市	榆林市	榆林市	神木市	永兴冰雪世界(暂停营业)	泥河村	室内	待划分	城市综合体室内雪场型	GaodeAPI_text(滑雪场)	110.492	38.8886	B0IKGD5BN0	榆林市	低海拔人工造雪型	3	0	-1.54995	0	0.60106	0.240424	Ⅲ 中等	75486800	103.37	360.73	0.440279	0.13998	0.0309918	0.168542	0.045994	0.096377	1	0	Ⅱ类 高资源-低产业型
582	99	北京市	北京市	北京市	北京市	朝阳区	十万雪极室内滑雪(新辰里酒仙桥店)	酒仙桥路12号毕淘买生活广场3层028	室内	待划分	城市综合体室内雪场型	GaodeAPI_text(滑雪场)	116.491	39.9757	B0HBKCQU4N	北京市	低海拔人工造雪型	3	0	-1.55654	0	0.601269	0.240507	Ⅲ 中等	498431000	2914		4.08856	0.924275	0.873658		0.491484	0.763139	1	1	Ⅰ类 高资源-高产业型
583	467	新疆维吾尔自治区	昌吉回族自治州	昌吉回族自治州	昌吉回族自治州	昌吉市	努尔加国际滑雪场	庙儿沟乡三工滩	待识别	待划分	城郊体验型	GaodeAPI_text(滑雪场)	87.0876	43.8519	B0FFI9G21P	昌吉回族自治州	低海拔人工造雪型	3	7.03182	-1.56022	0.659842	0.601386	0.63646	Ⅴ 很高			0	0.222301			0	0.0193768	0.00968841	1	0	Ⅱ类 高资源-低产业型
584	340	山西省	吕梁市	吕梁市	吕梁市	离石区	朝阳滑雪场	德岗村	待识别	待划分	城郊体验型	GaodeAPI_text(滑雪场)	111.324	37.5643	B0FFGG3ZEF	吕梁市	低海拔人工造雪型	3	0.422727	-1.60762	0.0396673	0.60289	0.264956	Ⅳ 较高	26432400	232.84	334.65	0.428771	0.0490154	0.0698087	0.156357	0.0445888	0.0799424	1	0	Ⅱ类 高资源-低产业型
585	428	新疆维吾尔自治区	乌鲁木齐市	乌鲁木齐市	乌鲁木齐市	乌鲁木齐县	阳光滑雪场	乌鲁木齐县南水路154号	待识别	待划分	城郊体验型	GaodeAPI_text(滑雪场)	87.4811	43.4417	B03DF0T96S	乌鲁木齐市	低海拔人工造雪型	3	3.17045	-1.61799	0.297505	0.603219	0.419791	Ⅴ 很高	45021600	479.18	408.48	0.766738	0.0834866	0.143665	0.190852	0.0858578	0.125965	1	0	Ⅱ类 高资源-低产业型
586	539	河北省	保定市	保定市	保定市	涞源县	涞源县七山滑雪场	白石山镇西龙虎村373号	待识别	待划分	城郊体验型	GaodeAPI_text(滑雪场)	114.68	39.3268	B0FFI5SA6T	保定市	低海拔人工造雪型	3	0.00454545	-1.63978	0.00042653	0.603911	0.24182	Ⅲ 中等	47733000	684.19	909.89	1.29013	0.0885146	0.20513	0.425123	0.149769	0.217134	1	1	Ⅰ类 高资源-高产业型
587	257	山东省	泰安市	泰安市	泰安市	岱岳区	冰雪世界	南留南村太阳部落景区内	室内	待划分	城市综合体室内雪场型	GaodeAPI_text(雪世界)	117.127	36.0367	B0FFMAL9NI	泰安市	低海拔人工造雪型	3	0.0477273	-1.65107	0.00447857	0.604269	0.244395	Ⅳ 较高	36221000	482.1	534.87	1.54469	0.0671671	0.14454	0.249904	0.180853	0.160616	1	1	Ⅰ类 高资源-高产业型
588	89	北京市	北京市	北京市	北京市	昌平区	北京军都山滑雪场(暂停营业)	崔村镇真顺村588号	待识别	待划分	城郊体验型	GaodeAPI_text(滑雪场)	116.331	40.2397	B000A7PQ9P	北京市	低海拔人工造雪型	3	0	-1.65341	0	0.604344	0.241738	Ⅲ 中等	498431000	2914		4.08856	0.924275	0.873658		0.491484	0.763139	1	1	Ⅰ类 高资源-高产业型
589	268	山东省	济南市	济南市	济南市	历城区	冰雪世界(融创乐园店)	凤鸣路4963号	室内	待划分	城市综合体室内雪场型	GaodeAPI_text(冰雪世界)	117.196	36.6645	B0IUTA1FXY	济南市	低海拔人工造雪型	3	0.0954545	-1.66033	0.00895713	0.604563	0.2472	Ⅳ 较高	135276000	702.8	943.7	2.22687	0.250852	0.210709	0.440919	0.264154	0.291659	1	1	Ⅰ类 高资源-高产业型
590	220	宁夏回族自治区	银川市	银川市	银川市	兴庆区	雪乐山室内滑雪	银古路街道宝湖东路和丽景街东北交汇处(兴庆区万达广场)3楼3053	室内	待划分	城市综合体室内雪场型	GaodeAPI_text(滑雪训练)	106.299	38.4428	B0JK3UGD7Y	银川市	低海拔人工造雪型	3	0	-1.70038	0	0.605835	0.242334	Ⅲ 中等	29395300	0	290.81	1.21049	0.0545097	0	0.135873	0.140044	0.0826067	1	0	Ⅱ类 高资源-低产业型
591	169	吉林省	长春市	长春市	长春市	二道区	天定山滑雪场	莲花山生态旅游度假区泉眼镇泉眼村先锋屯泉眼大街	待识别	待划分	城郊体验型	GaodeAPI_text(滑雪场)	125.6	43.881	B0LRK7JK9S	长春市	低海拔人工造雪型	3	0	-1.7217	0	0.606511	0.242605	Ⅲ 中等	76321900	1381.52	910.19	0.868293	0.141529	0.414199	0.425263	0.0982586	0.269812	1	1	Ⅰ类 高资源-高产业型
592	457	新疆维吾尔自治区	喀什地区	喀什地区	喀什地区	疏附县	丝路明珠四季冰雪大世界	314国道与滨河大道交叉口东北180米	待识别	待划分	城市综合体室内雪场型	GaodeAPI_text(冰雪世界)	75.9125	39.43	B0L6V4JXT4	喀什地区	低海拔人工造雪型	3	0.393182	-1.72378	0.0368949	0.606577	0.264768	Ⅳ 较高			0	0.203751			0	0.0171117	0.00855585	1	0	Ⅱ类 高资源-低产业型
593	620	河北省	邢台市	邢台市	邢台市	广宗县	沙丘滑雪场	创业大道001号	待识别	待划分	城郊体验型	GaodeAPI_text(滑雪场)	115.18	37.0275	B0J63M2XMT	邢台市	低海拔人工造雪型	3	0.00909091	-1.73514	0.00085306	0.606938	0.243287	Ⅲ 中等	27659000	191.23	695.55	2.06729	0.05129	0.0573335	0.324978	0.244667	0.169567	1	1	Ⅰ类 高资源-高产业型
594	109	北京市	北京市	北京市	北京市	海淀区	北京西山滑雪场(暂停营业)	温泉镇温泉村南坡双坡路11号	待识别	待划分	城郊体验型	GaodeAPI_text(滑雪场)	116.157	40.0344	B000A9ET8K	北京市	低海拔人工造雪型	3	0	-1.78112	0	0.608398	0.243359	Ⅲ 中等	498431000	2914		4.08856	0.924275	0.873658		0.491484	0.763139	1	1	Ⅰ类 高资源-高产业型
595	544	河北省	保定市	保定市	保定市	莲池区	天阔滑雪场(暂停营业)	南二环与西二环交叉口东行500米红绿灯南行2公里宝硕路农大三分厂南	待识别	待划分	城郊体验型	GaodeAPI_text(滑雪场)	115.42	38.8032	B0FFJWA7TT	保定市	低海拔人工造雪型	3	0.00454545	-1.81597	0.00042653	0.609504	0.244057	Ⅲ 中等	47733000	684.19	909.89	1.29013	0.0885146	0.20513	0.425123	0.149769	0.217134	1	1	Ⅰ类 高资源-高产业型
596	345	山西省	大同市	大同市	大同市	阳高县	玉安滑雪场	重兴镇村东玉安生态岛内	待识别	待划分	城郊体验型	GaodeAPI_text(滑雪场)	113.677	40.2434	B0FFFPD35P	大同市	低海拔人工造雪型	3	0.165909	-1.82681	0.0155684	0.609848	0.25328	Ⅳ 较高	18024800	290.9	307.9	0.691564	0.0334246	0.0872159	0.143858	0.0766783	0.0852943	1	0	Ⅱ类 高资源-低产业型
597	68	北京市	北京市	北京市	北京市	大兴区	北京雪都滑雪场(暂停营业)	榆垡镇西麻各庄村村委会北200米	待识别	待划分	城郊体验型	GaodeAPI_text(滑雪场)	116.259	39.5405	B000AAETSP	北京市	低海拔人工造雪型	3	0	-1.83967	0	0.610256	0.244102	Ⅲ 中等	498431000	2914		4.08856	0.924275	0.873658		0.491484	0.763139	1	1	Ⅰ类 高资源-高产业型
598	216	宁夏回族自治区	石嘴山市	石嘴山市	石嘴山市	大武口区	宁夏贺翔航空旅游景区冰雪乐园	人民路街道星海湖北域环湖北路60号贺翔航空旅游景区	室内	待划分	城市综合体室内雪场型	GaodeAPI_text(冰雪世界)	106.417	38.9982	B0JK7OO6UH	石嘴山市	低海拔人工造雪型	3	0	-1.84893	0	0.61055	0.24422	Ⅳ 较高	5655300	15.29	75.09	0.736112	0.010487	0.00458416	0.0350839	0.082118	0.0330683	1	0	Ⅱ类 高资源-低产业型
599	869	青海省	海东市	海东市	海东市	乐都区	瞿昙国际滑雪场(暂停营业)	瞿昙镇药草台村	待识别	待划分	城郊体验型	GaodeAPI_text(滑雪场)	102.246	36.2886	B0FFGG1259	海东市	低海拔人工造雪型	3	1.03409	-1.86545	0.0970356	0.611074	0.302651	Ⅳ 较高	6054600	53.88	133.8	0.507025	0.0112275	0.016154	0.0625146	0.0541443	0.0360101	1	0	Ⅱ类 高资源-低产业型
600	740	甘肃省	兰州市	兰州市	兰州市	榆中县	榆中栖云小镇冰雪嘉年华(暂停营业)	环城西路55号栖云小镇公交站旁	待识别	待划分	城市综合体室内雪场型	GaodeAPI_text(冰雪世界)	104.087	35.8668	B0K02Z08F9	兰州市	低海拔人工造雪型	3	0.402273	-1.86795	0.0377479	0.611154	0.26711	Ⅳ 较高	37423000	421.4	442.51	1.03271	0.069396	0.126342	0.206751	0.118335	0.130206	1	0	Ⅱ类 高资源-低产业型
601	473	新疆维吾尔自治区	阿克苏地区	阿克苏地区	阿克苏地区	乌什县	乌什县泉域星空国际滑雪场	左奥特贝希乡阿拉萨依村	待识别	待划分	城市综合体室内雪场型	GaodeAPI_text(冰雪世界)	79.1871	41.1647	B0FFLP6SND	阿克苏地区	低海拔人工造雪型	3	0.654545	-1.89656	0.0614203	0.612062	0.281677	Ⅳ 较高			0	0.117211			0	0.00654434	0.00327217	1	0	Ⅱ类 高资源-低产业型
602	558	河北省	廊坊市	廊坊市	廊坊市	固安县	固安文创乐园冰雪大世界(建设中)	空港一号街区	待识别	待划分	城市综合体室内雪场型	GaodeAPI_text(冰雪世界)	116.277	39.4193	B0I6YRRRSS	廊坊市	低海拔人工造雪型	3	0	-1.90032	0	0.612181	0.244872	Ⅳ 较高	39046000	207.19	547.8	2.36175	0.0724057	0.0621185	0.255945	0.280624	0.167773	1	1	Ⅰ类 高资源-高产业型
603	114	北京市	北京市	北京市	北京市	石景山区	首钢园冰雪汇	北京市古城街道群明湖北路与动力街交叉口南360米	待识别	待划分	城郊体验型	GaodeAPI_text(冰雪城)	116.153	39.9116	B0JDVXMK8O	北京市	低海拔人工造雪型	3	0	-1.90175	0	0.612226	0.244891	Ⅳ 较高	498431000	2914		4.08856	0.924275	0.873658		0.491484	0.763139	1	1	Ⅰ类 高资源-高产业型
604	29	内蒙古自治区	乌兰察布市	乌兰察布市	乌兰察布市	凉城县	岱海国际滑雪场(暂停营业)	岱海镇小圪料沟村	待识别	待划分	城郊体验型	GaodeAPI_text(滑雪场)	112.556	40.6652	B0FFIIXP9M	乌兰察布市	低海拔人工造雪型	3	0.718182	-1.93397	0.0673918	0.613249	0.285735	Ⅳ 较高	12141900	195.4	160.48	0.304395	0.0225156	0.0585837	0.0749801	0.0294013	0.0463702	1	0	Ⅱ类 高资源-低产业型
605	441	新疆维吾尔自治区	伊犁哈萨克自治州	伊犁哈萨克自治州	伊犁哈萨克自治州	新源县	那拉提哈茵赛滑雪度假区(暂停营业)	218国道168号	待识别	待划分	滑雪+度假综合型	GaodeAPI_text(滑雪度假区)	84.0458	43.2998	B0J3VSW3WJ	伊犁哈萨克自治州	低海拔人工造雪型	3	5.50455	-1.99913	0.516528	0.615318	0.556044	Ⅴ 很高			0	0.308364			0	0.0298859	0.014943	1	0	Ⅱ类 高资源-低产业型
606	937	甘肃省	酒泉市	酒泉市		肃州区	九眼泉冰雪乐园		户外		城郊体验型	手工补录：锡林浩特市正达滑雪场.docx	98.5078	39.7451		酒泉市	低海拔人工造雪型	3	0	-2.0072	0	0.615574	0.24623	Ⅳ 较高										1	0	Ⅱ类 高资源-低产业型
607	614	河北省	邢台市	邢台市	邢台市	信都区	奥峰滑雪场(暂停开放)	西牛峪村西500米	待识别	待划分	滑雪+度假综合型	GaodeAPI_text(滑雪场)	114.219	37.0659	B0FFLK79CZ	邢台市	低海拔人工造雪型	3	0.00909091	-2.00732	0.00085306	0.615578	0.246743	Ⅳ 较高	27659000	191.23	695.55	2.06729	0.05129	0.0573335	0.324978	0.244667	0.169567	1	1	Ⅰ类 高资源-高产业型
608	560	河北省	张家口市	张家口市	张家口市	下花园区	蝶恋花滑雪场(暂停营业)	秀水西街	待识别	待划分	城郊体验型	GaodeAPI_text(滑雪场)	115.267	40.4874	B0KK9SKYDS	张家口市	低海拔人工造雪型	3	0.752273	-2.02005	0.0705907	0.615982	0.288747	Ⅳ 较高	19133000	213.58	405.01	1.00065	0.0354796	0.0640343	0.18923	0.11442	0.100791	1	0	Ⅱ类 高资源-低产业型
609	474	新疆维吾尔自治区	阿克苏地区	阿克苏地区	阿克苏地区	库车市	库车冰雪大世界	比西巴格乡林场村三组七号	待识别	待划分	城市综合体室内雪场型	GaodeAPI_text(冰雪世界)	82.8612	41.634	B0KKK5X8HG	阿克苏地区	低海拔人工造雪型	3	0.654545	-2.02289	0.0614203	0.616072	0.283281	Ⅳ 较高			0	0.117211			0	0.00654434	0.00327217	1	0	Ⅱ类 高资源-低产业型
610	782	辽宁省	本溪市	本溪市	本溪市	溪湖区	东风湖冰雪大世界(暂停营业)	东风湖旅游度假村内	待识别	待划分	城市综合体室内雪场型	GaodeAPI_text(滑雪场)	123.691	41.3272	B019E01SMQ	本溪市	低海拔人工造雪型	3	1.67955	-2.0243	0.157603	0.616117	0.341008	Ⅴ 很高	10256000	205.86	137.97	0.437776	0.0190184	0.0617197	0.0644629	0.0456884	0.0477224	1	0	Ⅱ类 高资源-低产业型
611	423	新疆维吾尔自治区	乌鲁木齐市	乌鲁木齐市	乌鲁木齐市	乌鲁木齐县	度假南山大众滑雪场	水西沟镇庙尔沟村南大路	待识别	待划分	城郊体验型	GaodeAPI_text(滑雪场)	87.4787	43.4506	B0H0FMKM3N	乌鲁木齐市	低海拔人工造雪型	3	3.17045	-2.03419	0.297505	0.61643	0.425075	Ⅴ 很高	45021600	479.18	408.48	0.766738	0.0834866	0.143665	0.190852	0.0858578	0.125965	1	0	Ⅱ类 高资源-低产业型
612	451	新疆维吾尔自治区	和田地区	和田地区	和田地区	和田县	和田县雪山旅游滑雪场	[]	待识别	待划分	滑雪+度假综合型	GaodeAPI_text(滑雪度假区)	79.7652	36.9743	B0KBMZ9HOG	和田地区	低海拔人工造雪型	3	0.0772727	-2.04628	0.00725101	0.616814	0.251076	Ⅳ 较高			0	0.074398			0	0.00131646	0.000658231	1	0	Ⅱ类 高资源-低产业型
613	888	黑龙江省	哈尔滨市	哈尔滨市	哈尔滨市	南岗区	冰雪巴洛克乐园	哈尔滨大街666号B17栋1单元21层2号	待识别	待划分	城郊体验型	GaodeAPI_text(冰雪乐园)	126.589	45.6938	B0JKBSNMQV	哈尔滨市	低海拔人工造雪型	3	3.125	-2.05666	0.293239	0.617144	0.422801	Ⅴ 很高	60163000	1105.69	0	0.482107	0.111564	0.331501	0	0.0511016	0.123542	1	0	Ⅱ类 高资源-低产业型
614	41	内蒙古自治区	呼和浩特市	呼和浩特市	呼和浩特市	和林格尔县	和林格尔浩海冰雪大世界	[]	待识别	待划分	城市综合体室内雪场型	GaodeAPI_text(冰雪世界)	111.826	40.4106	B0KKC1OO91	呼和浩特市	低海拔人工造雪型	3	1.22955	-2.06757	0.115376	0.61749	0.316222	Ⅴ 很高	41070800	419.64	360.41	0.609106	0.0761604	0.125814	0.168392	0.0666094	0.109244	1	0	Ⅱ类 高资源-低产业型
615	270	山东省	济南市	济南市	济南市	历城区	爱飞驰城市滑雪空间	将军路1688号华山环宇城F3层	待识别	待划分	城市综合体室内雪场型	GaodeAPI_text(滑雪场)	117.055	36.7163	B0J657HCWR	济南市	低海拔人工造雪型	3	0.0954545	-2.07061	0.00895713	0.617587	0.252409	Ⅳ 较高	135276000	702.8	943.7	2.22687	0.250852	0.210709	0.440919	0.264154	0.291659	1	1	Ⅰ类 高资源-高产业型
616	50	内蒙古自治区	呼和浩特市	呼和浩特市	呼和浩特市	赛罕区	大黑河冰雪大世界	滨河北街与乌海东街交叉口南20米	待识别	待划分	城市综合体室内雪场型	GaodeAPI_text(冰雪世界)	111.744	40.7488	B0H104UIC3	呼和浩特市	低海拔人工造雪型	3	1.22955	-2.07169	0.115376	0.617621	0.316274	Ⅴ 很高	41070800	419.64	360.41	0.609106	0.0761604	0.125814	0.168392	0.0666094	0.109244	1	0	Ⅱ类 高资源-低产业型
617	113	北京市	北京市	北京市	北京市	石景山区	石景山市民冰雪体育中心	八宝山地铁站A口北	待识别	待划分	城市综合体室内雪场型	GaodeAPI_text(冰雪世界)	116.234	39.9086	B0FFI8DAA1	北京市	低海拔人工造雪型	3	0	-2.07264	0	0.617651	0.24706	Ⅳ 较高	498431000	2914		4.08856	0.924275	0.873658		0.491484	0.763139	1	1	Ⅰ类 高资源-高产业型
618	164	吉林省	通化市	通化市	通化市	梅河口市	五奎山雪世界(滑雪场)	湾龙镇五奎山雪世界(滑雪场)	室内	待划分	城市综合体室内雪场型	GaodeAPI_text(滑雪场)	125.739	42.6164	B0IKDUA0RU	通化市	低海拔人工造雪型	3	4.68182	-2.0852	0.439326	0.61805	0.510816	Ⅴ 很高	5767900	66.9	149.95	0.464219	0.0106958	0.0200576	0.0700603	0.0489173	0.0374327	1	0	Ⅱ类 高资源-低产业型
619	92	北京市	北京市	北京市	北京市	昌平区	华彬庄园滑雪场(暂停营业)	华彬庄园	待识别	待划分	城郊体验型	GaodeAPI_text(滑雪场)	116.135	40.2041	B0FFGMAS5S	北京市	低海拔人工造雪型	3	0	-2.08547	0	0.618058	0.247223	Ⅳ 较高	498431000	2914		4.08856	0.924275	0.873658		0.491484	0.763139	1	1	Ⅰ类 高资源-高产业型
620	274	山东省	济南市	济南市	济南市	天桥区	济南黄河冰雪大世界	建邦黄河大桥南头桥西侧	待识别	待划分	城市综合体室内雪场型	GaodeAPI_text(冰雪世界)	116.934	36.7324	B0KKOSEGXF	济南市	低海拔人工造雪型	3	0.0954545	-2.09621	0.00895713	0.618399	0.252734	Ⅳ 较高	135276000	702.8	943.7	2.22687	0.250852	0.210709	0.440919	0.264154	0.291659	1	1	Ⅰ类 高资源-高产业型
621	565	河北省	张家口市	张家口市	张家口市	崇礼区	北欧中心跳台滑雪场	古棋路	待识别	待划分	体育赛事/训练型	GaodeAPI_text(滑雪场)	115.474	40.9121	B0L6LZNVPA	张家口市	低海拔人工造雪型	3	0.752273	-2.11371	0.0705907	0.618955	0.289936	Ⅳ 较高	19133000	213.58	405.01	1.00065	0.0354796	0.0640343	0.18923	0.11442	0.100791	1	0	Ⅱ类 高资源-低产业型
622	841	陕西省	榆林市	榆林市	榆林市	榆阳区	榆佳滑雪场(暂停营业)	校场东路事故中队东50米	待识别	待划分	城郊体验型	GaodeAPI_text(滑雪场)	109.783	38.277	B0IRYCA866	榆林市	低海拔人工造雪型	3	0	-2.11939	0	0.619135	0.247654	Ⅳ 较高	75486800	103.37	360.73	0.440279	0.13998	0.0309918	0.168542	0.045994	0.096377	1	0	Ⅱ类 高资源-低产业型
623	596	河北省	石家庄市	石家庄市	石家庄市	新华区	石家庄南高基滑雪场(暂停营业)	翠屏西路(石家庄南高基公园)	待识别	待划分	城郊体验型	GaodeAPI_text(滑雪场)	114.484	38.1151	B0FFFL0QJQ	石家庄市	低海拔人工造雪型	3	0.00681818	-2.15349	0.000639795	0.620218	0.248471	Ⅳ 较高	82034000	684.2	1123.35	2.03768	0.152121	0.205133	0.524856	0.241052	0.280791	1	1	Ⅰ类 高资源-高产业型
624	100	北京市	北京市	北京市	北京市	朝阳区	温榆欢乐冰雪季(暂停营业)	温榆河西园6号门(P停车场入园往南10米)	待识别	待划分	城郊体验型	GaodeAPI_text(滑雪场)	116.466	40.0745	B0IKXHQ46D	北京市	低海拔人工造雪型	3	0	-2.15533	0	0.620276	0.24811	Ⅳ 较高	498431000	2914		4.08856	0.924275	0.873658		0.491484	0.763139	1	1	Ⅰ类 高资源-高产业型
625	52	内蒙古自治区	呼和浩特市	呼和浩特市	呼和浩特市	赛罕区	马鬃山滑雪场训练中心	马鬃山滑雪场	待识别	待划分	体育赛事/训练型	GaodeAPI_text(滑雪场)	112.105	40.8688	B0JU3S1SD0	呼和浩特市	低海拔人工造雪型	3	1.22955	-2.21635	0.115376	0.622213	0.318111	Ⅴ 很高	41070800	419.64	360.41	0.609106	0.0761604	0.125814	0.168392	0.0666094	0.109244	1	0	Ⅱ类 高资源-低产业型
626	541	河北省	保定市	保定市	保定市	清苑区	冉庄滑雪场(暂停营业)	冉庄镇冉庄村冉庄文旅小镇西侧	待识别	待划分	城郊体验型	GaodeAPI_text(滑雪场)	115.371	38.657	B0IATBINB7	保定市	低海拔人工造雪型	3	0.00454545	-2.22185	0.00042653	0.622388	0.249211	Ⅳ 较高	47733000	684.19	909.89	1.29013	0.0885146	0.20513	0.425123	0.149769	0.217134	1	1	Ⅰ类 高资源-高产业型
627	594	河北省	石家庄市	石家庄市	石家庄市	平山县	平山县红崖谷滑雪场(暂停营业)	温塘镇白鹿大道南行8公里平山红崖谷景区内(北侧)	待识别	待划分	城郊体验型	GaodeAPI_text(滑雪场)	113.961	38.2134	B0FFK2Z7FA	石家庄市	低海拔人工造雪型	3	0.00681818	-2.22747	0.000639795	0.622566	0.24941	Ⅳ 较高	82034000	684.2	1123.35	2.03768	0.152121	0.205133	0.524856	0.241052	0.280791	1	1	Ⅰ类 高资源-高产业型
628	78	北京市	北京市	北京市	北京市	延庆区	八达岭滑雪场(暂停开放)	八达岭镇经济开发区66号	待识别	待划分	滑雪+度假综合型	GaodeAPI_text(滑雪场)	115.957	40.3469	B000A7OGMF	北京市	低海拔人工造雪型	3	0	-2.23116	0	0.622683	0.249073	Ⅳ 较高	498431000	2914		4.08856	0.924275	0.873658		0.491484	0.763139	1	1	Ⅰ类 高资源-高产业型
629	161	吉林省	通化市	通化市	通化市	东昌区	万峰通化滑雪度假区	[]	待识别	待划分	滑雪+度假综合型	GaodeAPI_text(滑雪场)	125.964	41.6524	B0I64S2WW5	通化市	低海拔人工造雪型	3	4.68182	-2.24102	0.439326	0.622996	0.512794	Ⅴ 很高	5767900	66.9	149.95	0.464219	0.0106958	0.0200576	0.0700603	0.0489173	0.0374327	1	0	Ⅱ类 高资源-低产业型
630	27	内蒙古自治区	乌兰察布市	乌兰察布市	乌兰察布市	丰镇市	丰镇梦幻岛冰雪王国(暂停营业)	巨宝庄镇南环路高铁桥往西200米路北	待识别	待划分	城市综合体室内雪场型	GaodeAPI_text(冰雪乐园)	113.129	40.4243	B0JK5Z8QAC	乌兰察布市	低海拔人工造雪型	3	0.718182	-2.25158	0.0673918	0.623331	0.289767	Ⅳ 较高	12141900	195.4	160.48	0.304395	0.0225156	0.0585837	0.0749801	0.0294013	0.0463702	1	0	Ⅱ类 高资源-低产业型
631	567	河北省	张家口市	张家口市	张家口市	崇礼区	塞北滑雪场(暂停开放)	四台嘴乡喜鹊梁峰北侧	待识别	待划分	滑雪+度假综合型	GaodeAPI_text(滑雪场)	115.369	40.8434	B013901PSV	张家口市	低海拔人工造雪型	3	0.752273	-2.2626	0.0705907	0.623681	0.291827	Ⅳ 较高	19133000	213.58	405.01	1.00065	0.0354796	0.0640343	0.18923	0.11442	0.100791	1	0	Ⅱ类 高资源-低产业型
632	118	北京市	北京市	北京市	北京市	顺义区	三二一夺冠滑雪	乔波冰雪世界一层	待识别	待划分	城郊体验型	GaodeAPI_text(滑雪场)	116.559	40.1184	B0J35NRJOR	北京市	低海拔人工造雪型	3	0	-2.27363	0	0.624031	0.249612	Ⅳ 较高	498431000	2914		4.08856	0.924275	0.873658		0.491484	0.763139	1	1	Ⅰ类 高资源-高产业型
633	455	新疆维吾尔自治区	喀什地区	喀什地区	喀什地区	岳普湖县	达瓦昆滑雪场(暂停营业)	达瓦昆沙漠旅游风景区-骆驼马骑乘点东侧280米	待识别	待划分	城郊体验型	GaodeAPI_text(滑雪场)	77.0457	39.0469	B0KKVSP9BO	喀什地区	低海拔人工造雪型	3	0.393182	-2.28903	0.0368949	0.62452	0.271945	Ⅳ 较高			0	0.203751			0	0.0171117	0.00855585	1	0	Ⅱ类 高资源-低产业型
634	143	吉林省	延边朝鲜族自治州	延边朝鲜族自治州	延边朝鲜族自治州	汪清县	满天星滑雪场	满天星国家森林公园	待识别	待划分	城郊体验型	GaodeAPI_text(滑雪场)	129.671	43.1872	B059900OV7	延边朝鲜族自治州	低海拔人工造雪型	3	2.43864	-2.29045	0.228833	0.624565	0.387126	Ⅴ 很高			189.49	0.296596			0.0885343	0.028449	0.0584916	1	0	Ⅱ类 高资源-低产业型
635	218	宁夏回族自治区	银川市	银川市	银川市	兴庆区	塞上牧歌滑雪场	解放东路与三新路交叉口南20米	待识别	待划分	城郊体验型	GaodeAPI_text(滑雪场)	106.343	38.4603	B0FFLPV8AC	银川市	低海拔人工造雪型	3	0	-2.29069	0	0.624573	0.249829	Ⅳ 较高	29395300	0	290.81	1.21049	0.0545097	0	0.135873	0.140044	0.0826067	1	0	Ⅱ类 高资源-低产业型
636	111	北京市	北京市	北京市	北京市	海淀区	狂飙乐园滑雪场	南安河路1号	待识别	待划分	城郊体验型	GaodeAPI_text(滑雪场)	116.142	40.0506	B000A8VZ64	北京市	低海拔人工造雪型	3	0	-2.29346	0	0.624661	0.249864	Ⅳ 较高	498431000	2914		4.08856	0.924275	0.873658		0.491484	0.763139	1	1	Ⅰ类 高资源-高产业型
637	247	山东省	威海市	威海市	威海市	环翠区	雪乐山室内滑雪(威高广场店)	新威路17-5号威高广场C馆B1F层S05室	室内	待划分	城市综合体室内雪场型	GaodeAPI_text(滑雪场)	122.124	37.5051	B0I3R5SH58	威海市	低海拔人工造雪型	3	0	-2.30511	0	0.62503	0.250012	Ⅳ 较高	37286200	393.1	291.36	1.60219	0.0691424	0.117857	0.13613	0.187875	0.127751	1	0	Ⅱ类 高资源-低产业型
638	583	河北省	承德市	承德市	承德市	滦平县	金山岭滑雪旅游度假区	长山峪镇大雁子沟村	待识别	待划分	滑雪+度假综合型	GaodeAPI_text(滑雪度假区)	117.488	40.7904	B0L6PUDBVS	承德市	低海拔人工造雪型	3	0	-2.32434	0	0.625641	0.250256	Ⅳ 较高	19626000	300.48	330.22	0.366635	0.0363938	0.0900881	0.154287	0.0370014	0.0794425	1	0	Ⅱ类 高资源-低产业型
639	546	河北省	保定市	保定市	保定市	阜平县	龙泉关滑雪场	双龑山自然风景区	待识别	待划分	城郊体验型	GaodeAPI_text(滑雪场)	113.797	38.946	B0G0JAHM86	保定市	低海拔人工造雪型	3	0.00454545	-2.32626	0.00042653	0.625702	0.250537	Ⅳ 较高	47733000	684.19	909.89	1.29013	0.0885146	0.20513	0.425123	0.149769	0.217134	1	1	Ⅰ类 高资源-高产业型
640	63	北京市	北京市	北京市	北京市	丰台区	千灵山滑雪场	千灵山南门售票处北侧	待识别	待划分	城郊体验型	GaodeAPI_text(滑雪场)	116.089	39.8543	B0J6BAM9FO	北京市	低海拔人工造雪型	3	0	-2.34307	0	0.626235	0.250494	Ⅳ 较高	498431000	2914		4.08856	0.924275	0.873658		0.491484	0.763139	1	1	Ⅰ类 高资源-高产业型
641	239	山东省	临沂市	临沂市	临沂市	蒙阴县	凤凰崮滑雪场(暂停营业)	蒙阴街道会泉峪村	待识别	待划分	城郊体验型	GaodeAPI_text(滑雪场)	117.926	35.6784	B0J63R35XP	临沂市	低海拔人工造雪型	3	0.0340909	-2.34725	0.00319898	0.626368	0.252467	Ⅳ 较高	65558000	475.6	1094.38	1.87332	0.121569	0.142592	0.511321	0.220982	0.249116	1	1	Ⅰ类 高资源-高产业型
642	366	山西省	朔州市	朔州市	朔州市	右玉县	右玉牛心山滑雪场(暂停营业)	牛心堡乡	待识别	待划分	城郊体验型	GaodeAPI_text(滑雪场)	112.534	40.0443	B0FFFQ4BJM	朔州市	低海拔人工造雪型	3	0.254545	-2.35646	0.0238857	0.62666	0.264996	Ⅳ 较高	13285000	0	157.9	0.648392	0.0246353	0	0.0737747	0.0714066	0.0424541	1	0	Ⅱ类 高资源-低产业型
643	116	北京市	北京市	北京市	北京市	通州区	绿心冰雪嘉年华	绿心路与惠林路交叉口西340米	待识别	待划分	城市综合体室内雪场型	GaodeAPI_text(冰雪世界)	116.732	39.8677	B0LDDRF2AQ	北京市	低海拔人工造雪型	3	0	-2.3683	0	0.627036	0.250814	Ⅳ 较高	498431000	2914		4.08856	0.924275	0.873658		0.491484	0.763139	1	1	Ⅰ类 高资源-高产业型
644	106	北京市	北京市	北京市	北京市	朝阳区	雪如翼室内滑雪馆(东坝店)	姚家园北街与平房路交叉口西南200米	室内	待划分	城市综合体室内雪场型	GaodeAPI_text(滑雪场)	116.54	39.9471	B0LBRDHTCX	北京市	低海拔人工造雪型	3	0	-2.37604	0	0.627282	0.250913	Ⅳ 较高	498431000	2914		4.08856	0.924275	0.873658		0.491484	0.763139	1	1	Ⅰ类 高资源-高产业型
645	561	河北省	张家口市	张家口市	张家口市	尚义县	尚义县鸳鸯湖滑雪场(暂停营业)	毛忽庆村东鸳鸯湖滑雪场	待识别	待划分	城郊体验型	GaodeAPI_text(滑雪场)	114.018	41.0992	B0K065WQS9	张家口市	低海拔人工造雪型	3	0.752273	-2.39209	0.0705907	0.627791	0.293471	Ⅳ 较高	19133000	213.58	405.01	1.00065	0.0354796	0.0640343	0.18923	0.11442	0.100791	1	0	Ⅱ类 高资源-低产业型
646	80	北京市	北京市	北京市	北京市	延庆区	国家高山滑雪中心(暂停营业)	海坨山	待识别	待划分	体育赛事/训练型	GaodeAPI_text(滑雪中心)	115.81	40.5505	B0HKOUL9IC	北京市	低海拔人工造雪型	3	0	-2.40088	0	0.62807	0.251228	Ⅳ 较高	498431000	2914		4.08856	0.924275	0.873658		0.491484	0.763139	1	1	Ⅰ类 高资源-高产业型
647	791	辽宁省	沈阳市	沈阳市	沈阳市	浑南区	松果滑雪雪上训练中心	浑南中路30号(奥林匹克院内东北角)	待识别	待划分	体育赛事/训练型	GaodeAPI_text(滑雪场)	123.465	41.742	B0JD0RVE46	沈阳市	低海拔人工造雪型	3	0.536364	-2.41177	0.0503306	0.628416	0.281565	Ⅳ 较高	90271000	502.6	920.4	1.1764	0.167396	0.150687	0.430033	0.135881	0.220999	1	1	Ⅰ类 高资源-高产业型
648	839	陕西省	榆林市	榆林市	榆林市	榆阳区	天利和冰雪乐园	青云镇校场东路事故中队东20米	室内	待划分	城市综合体室内雪场型	GaodeAPI_text(冰雪乐园)	109.783	38.2771	B0I2GZCWDV	榆林市	低海拔人工造雪型	3	0	-2.42117	0	0.628714	0.251486	Ⅳ 较高	75486800	103.37	360.73	0.440279	0.13998	0.0309918	0.168542	0.045994	0.096377	1	0	Ⅱ类 高资源-低产业型
649	163	吉林省	通化市	通化市	通化市	柳河县	青龙山滑雪场	安口镇青沟子村青龙山滑雪场	待识别	待划分	城郊体验型	GaodeAPI_text(滑雪场)	125.64	42.1755	B0I66LG01O	通化市	低海拔人工造雪型	3	4.68182	-2.44025	0.439326	0.62932	0.515324	Ⅴ 很高	5767900	66.9	149.95	0.464219	0.0106958	0.0200576	0.0700603	0.0489173	0.0374327	1	0	Ⅱ类 高资源-低产业型
650	787	辽宁省	沈阳市	沈阳市	沈阳市	大东区	北纬63度滑雪俱乐部	北海嘉园北门旁(合作街地铁站B口步行200米)	待识别	待划分	城郊体验型	GaodeAPI_text(滑雪场)	123.471	41.8298	B0FFJO7RW4	沈阳市	低海拔人工造雪型	3	0.536364	-2.46884	0.0503306	0.630227	0.282289	Ⅳ 较高	90271000	502.6	920.4	1.1764	0.167396	0.150687	0.430033	0.135881	0.220999	1	1	Ⅰ类 高资源-高产业型
651	603	河北省	秦皇岛市	秦皇岛市	秦皇岛市	北戴河区	集发农业梦想王国滑雪场	海北路中段集发观光园内	待识别	待划分	城郊体验型	GaodeAPI_text(滑雪场)	119.415	39.8115	B014F0U4JC	秦皇岛市	低海拔人工造雪型	3	0	-2.47385	0	0.630387	0.252155	Ⅳ 较高	2.12856e+07	268.57	310.74	0.78704	0.0394713	0.0805211	0.145185	0.0883368	0.0883786	1	0	Ⅱ类 高资源-低产业型
652	456	新疆维吾尔自治区	喀什地区	喀什地区	喀什地区	泽普县	金湖杨滑雪场(暂停营业)	奎依巴格镇金湖杨国家森林斜对面	待识别	待划分	城市综合体室内雪场型	GaodeAPI_text(冰雪世界)	76.9813	38.0202	B0FFGF2HCT	喀什地区	低海拔人工造雪型	3	0.393182	-2.47623	0.0368949	0.630462	0.274322	Ⅳ 较高			0	0.203751			0	0.0171117	0.00855585	1	0	Ⅱ类 高资源-低产业型
653	101	北京市	北京市	北京市	北京市	朝阳区	管庄滑雪场	双桥东路9号	待识别	待划分	城郊体验型	GaodeAPI_text(滑雪场)	116.607	39.8964	B0IKLSSRC7	北京市	低海拔人工造雪型	3	0	-2.47796	0	0.630517	0.252207	Ⅳ 较高	498431000	2914		4.08856	0.924275	0.873658		0.491484	0.763139	1	1	Ⅰ类 高资源-高产业型
654	780	辽宁省	抚顺市	抚顺市	抚顺市	望花区	热高冰雪世界(暂停营业)	高湾经济开发区高望路1号热高乐园	室内	待划分	城市综合体室内雪场型	GaodeAPI_text(冰雪世界)	123.739	41.8844	B0FFHMLJ9I	抚顺市	低海拔人工造雪型	3	1.85	-2.49346	0.173598	0.631009	0.356562	Ⅴ 很高	10109000	26.85	174.8	0.41936	0.0187458	0.00805001	0.0816708	0.0434396	0.0379766	1	0	Ⅱ类 高资源-低产业型
655	43	内蒙古自治区	呼和浩特市	呼和浩特市	呼和浩特市	回民区	北极光滑雪场(暂停营业)	乌素图国家森林公园内北极光滑雪场售票处	待识别	待划分	城郊体验型	GaodeAPI_text(滑雪场)	111.58	40.8477	B01D703EF7	呼和浩特市	低海拔人工造雪型	3	1.22955	-2.50324	0.115376	0.631319	0.321754	Ⅴ 很高	41070800	419.64	360.41	0.609106	0.0761604	0.125814	0.168392	0.0666094	0.109244	1	0	Ⅱ类 高资源-低产业型
656	124	吉林省	吉林市	吉林市	吉林市	丰满区	松花湖滑雪场	青山大街888号	待识别	待划分	城郊体验型	GaodeAPI_text(滑雪场)	126.625	43.6753	B01B0008CB	吉林市	低海拔人工造雪型	3	0	-2.52872	0	0.632128	0.252851	Ⅳ 较高	16332300	547.2	352.81	0.534725	0.0302861	0.164058	0.164841	0.0575268	0.104178	1	0	Ⅱ类 高资源-低产业型
657	55	内蒙古自治区	赤峰市	赤峰市	赤峰市	喀喇沁旗	马鞍山采缇冰雪乐园	平锦线	室内	待划分	城市综合体室内雪场型	GaodeAPI_text(冰雪乐园)	118.769	41.8889	B0L6N7U6CB	赤峰市	低海拔人工造雪型	3	0	-2.53884	0	0.632449	0.25298	Ⅳ 较高	23220700	201.1	396.7	0.32252	0.0430597	0.0602926	0.185348	0.0316145	0.0800787	1	0	Ⅱ类 高资源-低产业型
658	840	陕西省	榆林市	榆林市	榆林市	榆阳区	柳湾沟冰雪欢乐谷(暂停营业)	古塔镇古塔新村杭庄组	待识别	待划分	城郊体验型	GaodeAPI_text(冰雪乐园)	109.838	38.2168	B0IKF78YUY	榆林市	低海拔人工造雪型	3	0	-2.53907	0	0.632457	0.252983	Ⅳ 较高	75486800	103.37	360.73	0.440279	0.13998	0.0309918	0.168542	0.045994	0.096377	1	0	Ⅱ类 高资源-低产业型
659	420	新疆维吾尔自治区	乌鲁木齐市	乌鲁木齐市	乌鲁木齐市	乌鲁木齐县	丝绸之路国际滑雪场	水西沟镇平西梁村二队丝绸之路国际度假区内	待识别	待划分	城郊体验型	GaodeAPI_text(滑雪场)	87.4146	43.4416	B03DF06OE3	乌鲁木齐市	低海拔人工造雪型	3	3.17045	-2.57327	0.297505	0.633542	0.43192	Ⅴ 很高	45021600	479.18	408.48	0.766738	0.0834866	0.143665	0.190852	0.0858578	0.125965	1	0	Ⅱ类 高资源-低产业型
660	845	陕西省	榆林市	榆林市	榆林市	榆阳区	驼城滑雪场(暂停营业)	校场东路事故中队东500米	待识别	待划分	城郊体验型	GaodeAPI_text(滑雪场)	109.788	38.2762	B0H095KYHX	榆林市	低海拔人工造雪型	3	0	-2.57979	0	0.633749	0.2535	Ⅳ 较高	75486800	103.37	360.73	0.440279	0.13998	0.0309918	0.168542	0.045994	0.096377	1	0	Ⅱ类 高资源-低产业型
661	74	北京市	北京市	北京市	北京市	密云区	云佛山滑雪场	溪翁庄镇走马庄村荞麦峪大南沟	待识别	待划分	城郊体验型	GaodeAPI_text(滑雪场)	116.882	40.4739	B000A7YMH8	北京市	低海拔人工造雪型	3	0	-2.5887	0	0.634032	0.253613	Ⅳ 较高	498431000	2914		4.08856	0.924275	0.873658		0.491484	0.763139	1	1	Ⅰ类 高资源-高产业型
662	443	新疆维吾尔自治区	伊犁哈萨克自治州	伊犁哈萨克自治州	伊犁哈萨克自治州	霍尔果斯市	霍尔果斯市雪之恋滑雪场(暂停营业)	伊车嘎善乡赤哲嘎善村一组薰衣草地东	待识别	待划分	城市综合体室内雪场型	GaodeAPI_text(冰雪世界)	80.6432	44.2619	B0GKTUNVU5	伊犁哈萨克自治州	低海拔人工造雪型	3	5.50455	-2.59326	0.516528	0.634177	0.563588	Ⅴ 很高			0	0.308364			0	0.0298859	0.014943	1	0	Ⅱ类 高资源-低产业型
663	34	内蒙古自治区	包头市	包头市	包头市	东河区	南海冰雪大世界(暂停营业)	二里半水产路23号	待识别	待划分	城市综合体室内雪场型	GaodeAPI_text(冰雪乐园)	110.032	40.5599	B0JKYS74VZ	包头市	低海拔人工造雪型	3	0	-2.61973	0	0.635017	0.254007	Ⅳ 较高	45750600	234.9	276.17	0.360691	0.0848385	0.0704263	0.129033	0.0362756	0.0801434	1	0	Ⅱ类 高资源-低产业型
664	792	辽宁省	沈阳市	沈阳市	沈阳市	浑南区	棋盘山冰雪大世界	棋盘山国际旅游风景区内(近关东影视城棋盘山动物园)	待识别	待划分	城市综合体室内雪场型	GaodeAPI_text(滑雪场)	123.692	41.9376	B00180JAE3	沈阳市	低海拔人工造雪型	3	0.536364	-2.68549	0.0503306	0.637105	0.28504	Ⅳ 较高	90271000	502.6	920.4	1.1764	0.167396	0.150687	0.430033	0.135881	0.220999	1	1	Ⅰ类 高资源-高产业型
665	554	河北省	唐山市	唐山市	唐山市	迁西县	将军山滑雪场(暂停营业)	将军山风景区	待识别	待划分	城郊体验型	GaodeAPI_text(滑雪场)	118.299	40.2116	B0FFGA41YO	唐山市	低海拔人工造雪型	3	0	-2.6923	0	0.637321	0.254928	Ⅳ 较高	100039000	446.97	771.95	1.98314	0.185509	0.134008	0.360674	0.234392	0.228646	1	1	Ⅰ类 高资源-高产业型
666	56	内蒙古自治区	通辽市	通辽市	通辽市	科尔沁左翼后旗	欧翔玖玖滑雪场(暂停营业)	甘旗卡镇北304公路东侧	待识别	待划分	城郊体验型	GaodeAPI_text(滑雪基地)	122.305	43.0328	B0FFIIMUYB	通辽市	低海拔人工造雪型	3	0	-2.70685	0	0.637783	0.255113	Ⅳ 较高	16862000	223.12	280.66	0.320681	0.0312684	0.0668945	0.131131	0.03139	0.065171	1	0	Ⅱ类 高资源-低产业型
667	96	北京市	北京市	北京市	北京市	朝阳区	乐雪四季.雪乐山室内滑雪馆(城外诚店)	城外诚家居南广场东侧教育培训中心1层001	室内	待划分	城市综合体室内雪场型	GaodeAPI_text(滑雪场)	116.453	39.8341	B0FFI8RV0C	北京市	低海拔人工造雪型	3	0	-2.7382	0	0.638778	0.255511	Ⅳ 较高	498431000	2914		4.08856	0.924275	0.873658		0.491484	0.763139	1	1	Ⅰ类 高资源-高产业型
668	432	新疆维吾尔自治区	乌鲁木齐市	乌鲁木齐市	乌鲁木齐市	水磨沟区	维斯特滑雪场(暂停营业)	水磨沟街道温泉路287号	待识别	待划分	城郊体验型	GaodeAPI_text(滑雪场)	87.6732	43.8439	B0FFFSUCT1	乌鲁木齐市	低海拔人工造雪型	3	3.17045	-2.74536	0.297505	0.639005	0.434105	Ⅴ 很高	45021600	479.18	408.48	0.766738	0.0834866	0.143665	0.190852	0.0858578	0.125965	1	0	Ⅱ类 高资源-低产业型
669	82	北京市	北京市	北京市	北京市	怀柔区	怀柔钓鱼岛冰雪世界	杨宋镇梭草村	室内	待划分	城市综合体室内雪场型	GaodeAPI_text(雪世界)	116.685	40.2394	B0L2KAG433	北京市	低海拔人工造雪型	3	0	-2.75	0	0.639152	0.255661	Ⅳ 较高	498431000	2914		4.08856	0.924275	0.873658		0.491484	0.763139	1	1	Ⅰ类 高资源-高产业型
670	369	山西省	朔州市	朔州市	朔州市	怀仁市	幻城漫林岛-冰雪乐园	海北头乡陈庄村南500米	室内	待划分	城市综合体室内雪场型	GaodeAPI_text(冰雪世界)	113.208	39.8273	B0J0VSMRIP	朔州市	低海拔人工造雪型	3	0.254545	-2.75049	0.0238857	0.639168	0.269998	Ⅳ 较高	13285000	0	157.9	0.648392	0.0246353	0	0.0737747	0.0714066	0.0424541	1	0	Ⅱ类 高资源-低产业型
671	543	河北省	保定市	保定市	保定市	莲池区	保定丰台滑雪场越野场	[]	待识别	待划分	城郊体验型	GaodeAPI_text(滑雪场)	115.395	38.7844	B0FFJOU8L0	保定市	低海拔人工造雪型	3	0.00454545	-2.75108	0.00042653	0.639186	0.25593	Ⅳ 较高	47733000	684.19	909.89	1.29013	0.0885146	0.20513	0.425123	0.149769	0.217134	1	1	Ⅰ类 高资源-高产业型
672	104	北京市	北京市	北京市	北京市	朝阳区	雪乐山(万达广场北京东坝店)	东坝南二街与东坝中路交汇处万达广场(北京东坝店)2F层2017	室内	待划分	城市综合体室内雪场型	GaodeAPI_text(雪乐山)	116.549	39.9621	B0J2S69RX2	北京市	低海拔人工造雪型	3	0	-2.75206	0	0.639217	0.255687	Ⅳ 较高	498431000	2914		4.08856	0.924275	0.873658		0.491484	0.763139	1	1	Ⅰ类 高资源-高产业型
673	425	新疆维吾尔自治区	乌鲁木齐市	乌鲁木齐市	乌鲁木齐市	乌鲁木齐县	白云滑雪场度假区	水西沟东湾村老虎沟	待识别	待划分	滑雪+度假综合型	GaodeAPI_text(滑雪场)	87.4949	43.4444	B03DF0SJKV	乌鲁木齐市	低海拔人工造雪型	3	3.17045	-2.77245	0.297505	0.639865	0.434449	Ⅴ 很高	45021600	479.18	408.48	0.766738	0.0834866	0.143665	0.190852	0.0858578	0.125965	1	0	Ⅱ类 高资源-低产业型
674	95	北京市	北京市	北京市	北京市	朝阳区	SKINOW雪乐山室内滑雪(林奥CITY PARK购物中心店)	林奥购物中心二层北侧	室内	待划分	城市综合体室内雪场型	GaodeAPI_text(滑雪小镇)	116.409	40.0344	B0K077HESH	北京市	低海拔人工造雪型	3	0	-2.78561	0	0.640282	0.256113	Ⅳ 较高	498431000	2914		4.08856	0.924275	0.873658		0.491484	0.763139	1	1	Ⅰ类 高资源-高产业型
675	580	河北省	承德市	承德市	承德市	兴隆县	京承冰雪大世界	挂兰峪镇大鹿圈村大广场	待识别	待划分	城市综合体室内雪场型	GaodeAPI_text(冰雪世界)	117.698	40.2902	B0KKRAR66E	承德市	低海拔人工造雪型	3	0	-2.7936	0	0.640536	0.256214	Ⅳ 较高	19626000	300.48	330.22	0.366635	0.0363938	0.0900881	0.154287	0.0370014	0.0794425	1	0	Ⅱ类 高资源-低产业型
676	85	北京市	北京市	北京市	北京市	房山区	航嘉滑雪体验馆	窦店镇白草洼村八步口38号	待识别	待划分	滑雪+度假综合型	GaodeAPI_text(滑雪小镇)	116.047	39.625	B0K2S7954I	北京市	低海拔人工造雪型	3	0	-2.80653	0	0.640947	0.256379	Ⅳ 较高	498431000	2914		4.08856	0.924275	0.873658		0.491484	0.763139	1	1	Ⅰ类 高资源-高产业型
677	748	甘肃省	武威市	武威市	武威市	凉州区	凉州区柏树镇冰雪乐园	柏树镇中畦村五组156号	室内	待划分	城市综合体室内雪场型	GaodeAPI_text(冰雪乐园)	102.586	37.9397	B0K6YD23EM	武威市	低海拔人工造雪型	3	0	-2.84609	0	0.642202	0.256881	Ⅳ 较高	7500200	66	142.73	0.327366	0.0139081	0.0197877	0.0666869	0.0322063	0.0331473	1	0	Ⅱ类 高资源-低产业型
678	675	河南省	郑州市	郑州市	郑州市	中牟县	雁鸣蟹岛滑雪场(暂停营业)	七彩滑	待识别	待划分	城郊体验型	GaodeAPI_text(滑雪场)	114.077	34.823	B0FFKCRTP9	郑州市	低海拔人工造雪型	3	0	-2.84616	0	0.642205	0.256882	Ⅳ 较高	145321000	1401.1	1300.8	2.99446	0.269479	0.42007	0.607765	0.357884	0.413799	1	1	Ⅰ类 高资源-高产业型
679	341	山西省	大同市	大同市	大同市	云州区	大同万龙白登山国际滑雪场	白登山森林公园	待识别	待划分	城郊体验型	GaodeAPI_text(滑雪场)	113.386	40.1303	B0FFI8PCXS	大同市	低海拔人工造雪型	3	0.165909	-2.85743	0.0155684	0.642562	0.266366	Ⅳ 较高	18024800	290.9	307.9	0.691564	0.0334246	0.0872159	0.143858	0.0766783	0.0852943	1	0	Ⅱ类 高资源-低产业型
680	577	河北省	张家口市	张家口市	张家口市	崇礼区	雪如意滑雪场	古棋路	待识别	待划分	城郊体验型	GaodeAPI_text(滑雪场)	115.477	40.9165	B0K07CC3ZJ	张家口市	低海拔人工造雪型	3	0.752273	-2.86966	0.0705907	0.642951	0.299535	Ⅳ 较高	19133000	213.58	405.01	1.00065	0.0354796	0.0640343	0.18923	0.11442	0.100791	1	0	Ⅱ类 高资源-低产业型
681	159	吉林省	白山市	白山市	白山市	浑江区	白山滑雪场	岳桦路	待识别	待划分	城郊体验型	GaodeAPI_text(滑雪场)	126.407	41.9591	B01B700A7H	白山市	低海拔人工造雪型	3	5.78409	-2.87638	0.54276	0.643164	0.582921	Ⅴ 很高	5678500	0	89.59	0.42315	0.01053	0	0.0418586	0.0439024	0.0240728	1	0	Ⅱ类 高资源-低产业型
682	938	甘肃省	张掖市	张掖市		肃南县	肃南县文殊山滑雪场		户外		滑雪+度假综合型	手工补录：锡林浩特市正达滑雪场.docx	98.3621	39.6501		张掖市	低海拔人工造雪型	3	0	-2.90248	0	0.643992	0.257597	Ⅳ 较高										1	0	Ⅱ类 高资源-低产业型
683	103	北京市	北京市	北京市	北京市	朝阳区	蓝调庄园滑雪场(暂停营业)	金盏乡楼梓庄村蓝调庄园	待识别	待划分	城郊体验型	GaodeAPI_text(滑雪场)	116.608	39.9642	B0FFFOC0TN	北京市	低海拔人工造雪型	3	0	-2.90983	0	0.644225	0.25769	Ⅳ 较高	498431000	2914		4.08856	0.924275	0.873658		0.491484	0.763139	1	1	Ⅰ类 高资源-高产业型
684	59	内蒙古自治区	鄂尔多斯市	鄂尔多斯市	鄂尔多斯市	达拉特旗	华莲旅游度假区滑雪场	[]	待识别	待划分	滑雪+度假综合型	GaodeAPI_text(滑雪度假区)	109.935	40.2325	B0JKPUTRSS	鄂尔多斯市	低海拔人工造雪型	3	0.0931818	-2.923	0.00874387	0.644644	0.263104	Ⅳ 较高	63630292	327.33	222.03	0.307037	0.117994	0.0981382	0.103738	0.0297239	0.0873985	1	0	Ⅱ类 高资源-低产业型
685	62	北京市	北京市	北京市	北京市	丰台区	北京万龙八易滑雪场	[]	待识别	待划分	城郊体验型	GaodeAPI_text(滑雪场)	116.158	39.8724	B0KAM53T9F	北京市	低海拔人工造雪型	3	0	-2.94605	0	0.645375	0.25815	Ⅳ 较高	498431000	2914		4.08856	0.924275	0.873658		0.491484	0.763139	1	1	Ⅰ类 高资源-高产业型
686	579	河北省	张家口市	张家口市	张家口市	沽源县	库伦淖尔滑雪场(暂停营业)	梁东村	待识别	待划分	城郊体验型	GaodeAPI_text(滑雪场)	115.695	41.7217	B0I6PZETA0	张家口市	低海拔人工造雪型	3	0.752273	-2.96121	0.0705907	0.645856	0.300697	Ⅳ 较高	19133000	213.58	405.01	1.00065	0.0354796	0.0640343	0.18923	0.11442	0.100791	1	0	Ⅱ类 高资源-低产业型
687	44	内蒙古自治区	呼和浩特市	呼和浩特市	呼和浩特市	土默特左旗	伊利健康谷敕勒川欢乐冰雪世界	伊利健康谷博学路与乳业大街交叉口东北角	室内	待划分	城市综合体室内雪场型	GaodeAPI_text(雪世界)	111.501	40.7345	B0KK2ZCV7J	呼和浩特市	低海拔人工造雪型	3	1.22955	-2.97761	0.115376	0.646377	0.327777	Ⅴ 很高	41070800	419.64	360.41	0.609106	0.0761604	0.125814	0.168392	0.0666094	0.109244	1	0	Ⅱ类 高资源-低产业型
688	893	黑龙江省	哈尔滨市	哈尔滨市	哈尔滨市	尚志市	尚志市石咀山冬际滑雪场	[]	待识别	待划分	城郊体验型	GaodeAPI_text(滑雪场)	128.028	45.2081	B0FFKBBIYI	哈尔滨市	低海拔人工造雪型	3	3.125	-2.9897	0.293239	0.646761	0.434648	Ⅴ 很高	60163000	1105.69	0	0.482107	0.111564	0.331501	0	0.0511016	0.123542	1	0	Ⅱ类 高资源-低产业型
689	32	内蒙古自治区	乌海市	乌海市	乌海市	海勃湾区	乌海湖冰雪世界欢乐谷(暂停营业)	滨河大道2号	室内	待划分	城市综合体室内雪场型	GaodeAPI_text(冰雪乐园)	106.783	39.6476	B0IAVZGL2H	乌海市	低海拔人工造雪型	3	0	-2.99331	0	0.646875	0.25875	Ⅳ 较高	5955700	0	55.62	1.38365	0.0110441	0	0.025987	0.161189	0.049555	1	0	Ⅱ类 高资源-低产业型
690	605	河北省	秦皇岛市	秦皇岛市	秦皇岛市	海港区	燕塞山滑雪场(暂停营业)	北港镇西连峪村	待识别	待划分	城郊体验型	GaodeAPI_text(滑雪场)	119.643	40.0479	B0FFF7566P	秦皇岛市	低海拔人工造雪型	3	0	-3.03073	0	0.648063	0.259225	Ⅳ 较高	2.12856e+07	268.57	310.74	0.78704	0.0394713	0.0805211	0.145185	0.0883368	0.0883786	1	0	Ⅱ类 高资源-低产业型
691	151	吉林省	白山市	白山市	白山市	临江市	坡口中朝边境滑雪场	四道沟坡口村内	待识别	待划分	城郊体验型	GaodeAPI_text(滑雪场)	127.071	41.7346	B0FFGG3XEU	白山市	低海拔人工造雪型	3	5.78409	-3.03251	0.54276	0.64812	0.584904	Ⅴ 很高	5678500	0	89.59	0.42315	0.01053	0	0.0418586	0.0439024	0.0240728	1	0	Ⅱ类 高资源-低产业型
692	71	北京市	北京市	北京市	北京市	大兴区	盘龙翠古极地冰雪大世界(暂停开放)	北京市庞各庄镇庞各庄桥东2000米	待识别	待划分	城市综合体室内雪场型	GaodeAPI_text(冰雪世界)	116.35	39.6365	B0FFGFAFNK	北京市	低海拔人工造雪型	3	0	-3.07034	0	0.64932	0.259728	Ⅳ 较高	498431000	2914		4.08856	0.924275	0.873658		0.491484	0.763139	1	1	Ⅰ类 高资源-高产业型
693	135	吉林省	延边朝鲜族自治州	延边朝鲜族自治州	延边朝鲜族自治州	安图县	长白山红松王滑雪场	二道白河镇南20公里处长白山国家森林公园内	待识别	待划分	城郊体验型	GaodeAPI_text(滑雪场)	128.197	42.2143	B0FFILLPGU	延边朝鲜族自治州	低海拔人工造雪型	3	2.43864	-3.10142	0.228833	0.650307	0.397423	Ⅴ 很高			189.49	0.296596			0.0885343	0.028449	0.0584916	1	0	Ⅱ类 高资源-低产业型
694	615	河北省	邢台市	邢台市	邢台市	信都区	邢台天梯山冰雪乐园	西黄村镇东牛家庄村	室内	待划分	城市综合体室内雪场型	GaodeAPI_text(冰雪世界)	114.254	37.1026	B0HKTUDQFC	邢台市	低海拔人工造雪型	3	0.00909091	-3.10774	0.00085306	0.650508	0.260715	Ⅳ 较高	27659000	191.23	695.55	2.06729	0.05129	0.0573335	0.324978	0.244667	0.169567	1	1	Ⅰ类 高资源-高产业型
695	140	吉林省	延边朝鲜族自治州	延边朝鲜族自治州	延边朝鲜族自治州	延吉市	梦都美滑雪场	依兰镇春兴村5队梦都美民俗旅游度假村	待识别	待划分	城郊体验型	GaodeAPI_text(滑雪场)	129.589	43.0379	B05990MARN	延边朝鲜族自治州	低海拔人工造雪型	3	2.43864	-3.14635	0.228833	0.651733	0.397993	Ⅴ 很高			189.49	0.296596			0.0885343	0.028449	0.0584916	1	0	Ⅱ类 高资源-低产业型
696	790	辽宁省	沈阳市	沈阳市	沈阳市	沈北新区	沈阳怪坡国际滑雪场	怪坡路80号(怪坡风景区南门)	待识别	待划分	城郊体验型	GaodeAPI_text(滑雪场)	123.65	42.0536	B001816SU8	沈阳市	低海拔人工造雪型	3	0.536364	-3.14674	0.0503306	0.651746	0.290897	Ⅳ 较高	90271000	502.6	920.4	1.1764	0.167396	0.150687	0.430033	0.135881	0.220999	1	1	Ⅰ类 高资源-高产业型
697	79	北京市	北京市	北京市	北京市	延庆区	北京石京龙滑雪场	张山营镇旧小路	待识别	待划分	滑雪+度假综合型	GaodeAPI_text(滑雪场)	115.97	40.5252	B000A7QCCX	北京市	低海拔人工造雪型	3	0	-3.16017	0	0.652172	0.260869	Ⅳ 较高	498431000	2914		4.08856	0.924275	0.873658		0.491484	0.763139	1	1	Ⅰ类 高资源-高产业型
698	87	北京市	北京市	北京市	北京市	昌平区	SKIONE壹心趣滑雪馆(回龙观店)	育知东路30号北京华联BHG Mall(同成街店)F2层F2-36	待识别	待划分	城市综合体室内雪场型	GaodeAPI_text(滑雪场)	116.338	40.0722	B0I33SS0E2	北京市	低海拔人工造雪型	3	0	-3.16704	0	0.65239	0.260956	Ⅳ 较高	498431000	2914		4.08856	0.924275	0.873658		0.491484	0.763139	1	1	Ⅰ类 高资源-高产业型
699	289	山东省	淄博市	淄博市	淄博市	临淄区	蓝溪国际滑雪场	齐陵街道办南山庄村村委院内	待识别	待划分	城郊体验型	GaodeAPI_text(滑雪场)	118.359	36.7819	B0FFFPL78G	淄博市	低海拔人工造雪型	3	0.120455	-3.17226	0.011303	0.652556	0.267804	Ⅳ 较高	48840800	406.2	467.4	1.46726	0.0905688	0.121784	0.218381	0.171398	0.150533	1	1	Ⅰ类 高资源-高产业型
700	198	天津市	天津市	天津市	天津市	北辰区	青盛河畔滑雪场	青盛河畔庄园	待识别	待划分	城郊体验型	GaodeAPI_text(滑雪场)	117.059	39.2187	B0IK1ZH87T	天津市	低海拔人工造雪型	3	0	-3.18019	0	0.652807	0.261123	Ⅳ 较高	180243200	0		2.77744	0.334237	0		0.331384	0.221874	1	1	Ⅰ类 高资源-高产业型
701	776	辽宁省	大连市	大连市	大连市	普兰店区	大连安波猎户滑雪(暂停营业)	安波镇宋家屯(大连安波温泉滑雪场对面)	待识别	待划分	滑雪+度假综合型	GaodeAPI_text(滑雪小镇)	122.288	39.8121	B0FFFIFUZ7	大连市	低海拔人工造雪型	3	0	-3.18854	0	0.653073	0.261229	Ⅳ 较高	95169000	610.3	753.9	1.4274	0.176478	0.182977	0.35224	0.166531	0.219557	1	1	Ⅰ类 高资源-高产业型
702	838	陕西省	榆林市	榆林市	榆林市	榆阳区	刘官寨滑雪场	榆海石油加油站北侧270米	待识别	待划分	城郊体验型	GaodeAPI_text(滑雪场)	109.773	38.1872	B0L6PM9SMB	榆林市	低海拔人工造雪型	3	0	-3.19366	0	0.653235	0.261294	Ⅳ 较高	75486800	103.37	360.73	0.440279	0.13998	0.0309918	0.168542	0.045994	0.096377	1	0	Ⅱ类 高资源-低产业型
703	795	辽宁省	铁岭市	铁岭市	铁岭市	开原市	七道壕冰雪乐园	靠山镇郭家沟村	室内	待划分	城市综合体室内雪场型	GaodeAPI_text(冰雪世界)	124.153	42.2891	B0I64SVNVE	铁岭市	低海拔人工造雪型	3	1.00909	-3.19607	0.0946897	0.653312	0.318138	Ⅴ 很高	7786000	55.29	226.4	0.480424	0.0144381	0.0165767	0.10578	0.0508961	0.0469226	1	0	Ⅱ类 高资源-低产业型
704	798	辽宁省	铁岭市	铁岭市	铁岭市	银州区	小马驹滑雪场	老官台马驹山	待识别	待划分	城郊体验型	GaodeAPI_text(滑雪场)	123.847	42.227	B019A06KAV	铁岭市	低海拔人工造雪型	3	1.00909	-3.20056	0.0946897	0.653454	0.318195	Ⅴ 很高	7786000	55.29	226.4	0.480424	0.0144381	0.0165767	0.10578	0.0508961	0.0469226	1	0	Ⅱ类 高资源-低产业型
705	156	吉林省	白山市	白山市	白山市	抚松县	长白山华美胜地滑雪场UTV体验区	漫江镇华美胜地滑雪场UTV体验区	待识别	待划分	城郊体验型	GaodeAPI_text(滑雪场)	127.525	41.9678	B0KK3ZWKT4	白山市	低海拔人工造雪型	3	5.78409	-3.2455	0.54276	0.654881	0.587608	Ⅴ 很高	5678500	0	89.59	0.42315	0.01053	0	0.0418586	0.0439024	0.0240728	1	0	Ⅱ类 高资源-低产业型
706	153	吉林省	白山市	白山市	白山市	抚松县	万达长白山国际度假区滑雪场	松江河镇白云路455号长白山万达国际旅游度假区	待识别	待划分	滑雪+度假综合型	GaodeAPI_text(滑雪场)	127.505	42.1059	B01B70M4B2	白山市	低海拔人工造雪型	3	5.78409	-3.26033	0.54276	0.655351	0.587796	Ⅴ 很高	5678500	0	89.59	0.42315	0.01053	0	0.0418586	0.0439024	0.0240728	1	0	Ⅱ类 高资源-低产业型
707	536	河北省	保定市	保定市	保定市	涞水县	御鹿园滑雪场	希望路与向阳路交叉口西南400米	待识别	待划分	城郊体验型	GaodeAPI_text(滑雪场)	115.683	39.3173	B0FFHNC8M3	保定市	低海拔人工造雪型	3	0.00454545	-3.30785	0.00042653	0.65686	0.263	Ⅳ 较高	47733000	684.19	909.89	1.29013	0.0885146	0.20513	0.425123	0.149769	0.217134	1	1	Ⅰ类 高资源-高产业型
708	850	陕西省	榆林市	榆林市	榆林市	神木市	阳崖沟滑雪场(暂停营业)	府阳路东山路口转角	待识别	待划分	城郊体验型	GaodeAPI_text(滑雪场)	110.508	38.8437	B0FFJ0UG51	榆林市	低海拔人工造雪型	3	0	-3.3279	0	0.657496	0.262998	Ⅳ 较高	75486800	103.37	360.73	0.440279	0.13998	0.0309918	0.168542	0.045994	0.096377	1	0	Ⅱ类 高资源-低产业型
709	155	吉林省	白山市	白山市	白山市	抚松县	长白山华美胜地山地滑雪场	漫江镇前进村华美胜地度假区内	待识别	待划分	滑雪+度假综合型	GaodeAPI_text(滑雪场)	127.523	41.964	B0FFHQ9EJB	白山市	低海拔人工造雪型	3	5.78409	-3.36383	0.54276	0.658637	0.58911	Ⅴ 很高	5678500	0	89.59	0.42315	0.01053	0	0.0418586	0.0439024	0.0240728	1	0	Ⅱ类 高资源-低产业型
710	90	北京市	北京市	北京市	北京市	昌平区	北京十三陵石牌坊冰雪大世界(暂停营业)	石牌坊	待识别	待划分	城市综合体室内雪场型	GaodeAPI_text(华发冰雪世界)	116.218	40.2355	B0J2RAG5XP	北京市	低海拔人工造雪型	3	0	-3.36675	0	0.658729	0.263492	Ⅳ 较高	498431000	2914		4.08856	0.924275	0.873658		0.491484	0.763139	1	1	Ⅰ类 高资源-高产业型
711	552	河北省	唐山市	唐山市	唐山市	路北区	雪坐标室内滑雪馆	爱琴海购物中心六层西南角	室内	待划分	城市综合体室内雪场型	GaodeAPI_text(滑雪中心)	118.165	39.6329	B0KK6LNOZY	唐山市	低海拔人工造雪型	3	0	-3.37077	0	0.658857	0.263543	Ⅳ 较高	100039000	446.97	771.95	1.98314	0.185509	0.134008	0.360674	0.234392	0.228646	1	1	Ⅰ类 高资源-高产业型
712	343	山西省	大同市	大同市	大同市	平城区	小石子滑雪场(暂停营业)	马军营街道小石子村南200米	待识别	待划分	城郊体验型	GaodeAPI_text(滑雪场)	113.267	40.1634	B0KKR50FPQ	大同市	低海拔人工造雪型	3	0.165909	-3.37127	0.0155684	0.658873	0.27289	Ⅳ 较高	18024800	290.9	307.9	0.691564	0.0334246	0.0872159	0.143858	0.0766783	0.0852943	1	0	Ⅱ类 高资源-低产业型
713	435	新疆维吾尔自治区	乌鲁木齐市	乌鲁木齐市	乌鲁木齐市	米东区	红光山-冰雪乐园	俊发红光山植物园(西北角)	室内	待划分	城市综合体室内雪场型	GaodeAPI_text(冰雪世界)	87.619	43.897	B0FFLKL836	乌鲁木齐市	低海拔人工造雪型	3	3.17045	-3.41254	0.297505	0.660183	0.442576	Ⅴ 很高	45021600	479.18	408.48	0.766738	0.0834866	0.143665	0.190852	0.0858578	0.125965	1	0	Ⅱ类 高资源-低产业型
714	556	河北省	唐山市	唐山市	唐山市	遵化市	遵化市龙山滑雪场	遵化镇学庄子村	待识别	待划分	城郊体验型	GaodeAPI_text(滑雪场)	117.979	40.1531	B0FFGDK1A1	唐山市	低海拔人工造雪型	3	0	-3.44268	0	0.661139	0.264456	Ⅳ 较高	100039000	446.97	771.95	1.98314	0.185509	0.134008	0.360674	0.234392	0.228646	1	1	Ⅰ类 高资源-高产业型
715	152	吉林省	白山市	白山市	白山市	抚松县	万达滑雪度假区度假小镇	吉林长白山万达滑雪场度假区	待识别	待划分	滑雪+度假综合型	GaodeAPI_text(滑雪场)	127.512	42.1045	B0FFGNKED5	白山市	低海拔人工造雪型	3	5.78409	-3.45101	0.54276	0.661404	0.590217	Ⅴ 很高	5678500	0	89.59	0.42315	0.01053	0	0.0418586	0.0439024	0.0240728	1	0	Ⅱ类 高资源-低产业型
716	94	北京市	北京市	北京市	北京市	朝阳区	SKINOW雪乐山室内滑雪(和平里店)	和平里西街21号天丰利生活MALL3F层	室内	待划分	城市综合体室内雪场型	GaodeAPI_text(滑雪小镇)	116.418	39.9627	B0LR2H5EJH	北京市	低海拔人工造雪型	3	0	-3.47129	0	0.662048	0.264819	Ⅳ 较高	498431000	2914		4.08856	0.924275	0.873658		0.491484	0.763139	1	1	Ⅰ类 高资源-高产业型
717	921	黑龙江省	牡丹江市	牡丹江市	牡丹江市	林口县	林口滑雪场	鹤大路	待识别	待划分	城郊体验型	GaodeAPI_text(滑雪场)	130.257	45.1698	B01C501P73	牡丹江市	低海拔人工造雪型	3	6.55455	-3.49454	0.615057	0.662786	0.634148	Ⅴ 很高	10513600	79.9	238.16	0.293006	0.0194961	0.0239551	0.111274	0.0280106	0.045684	1	0	Ⅱ类 高资源-低产业型
718	485	新疆维吾尔自治区	阿勒泰地区	阿勒泰地区	阿勒泰地区	布尔津县	禾木(吉克普林)国际滑雪度假区	禾木哈纳斯蒙古族乡禾木村禾木入口服务区管理用房2禾木(吉克普林)国际滑雪度假区北门	待识别	待划分	滑雪+度假综合型	GaodeAPI_text(滑雪度假区)	87.5522	48.605	B0H0OCYOJC	阿勒泰地区	低海拔人工造雪型	3	10.6568	-3.51462	1	0.663423	0.865369	Ⅴ 很高			0	0.119548			0	0.00682971	0.00341485	1	0	Ⅱ类 高资源-低产业型
719	430	新疆维吾尔自治区	乌鲁木齐市	乌鲁木齐市	乌鲁木齐市	水磨沟区	乌鲁木齐龙骧马术滑雪场	水磨沟村111号	待识别	待划分	城郊体验型	GaodeAPI_text(滑雪场)	87.6968	43.8193	B03DF0T16G	乌鲁木齐市	低海拔人工造雪型	3	3.17045	-3.51788	0.297505	0.663526	0.443913	Ⅴ 很高	45021600	479.18	408.48	0.766738	0.0834866	0.143665	0.190852	0.0858578	0.125965	1	0	Ⅱ类 高资源-低产业型
720	45	内蒙古自治区	呼和浩特市	呼和浩特市	呼和浩特市	新城区	呼和浩特大青山太伟滑雪场	保合少镇古路板村大青山太伟运动休闲度假村内	待识别	待划分	城郊体验型	GaodeAPI_text(滑雪场)	111.824	40.9512	B0FFFJQZ0X	呼和浩特市	低海拔人工造雪型	3	1.22955	-3.53924	0.115376	0.664204	0.334908	Ⅴ 很高	41070800	419.64	360.41	0.609106	0.0761604	0.125814	0.168392	0.0666094	0.109244	1	0	Ⅱ类 高资源-低产业型
721	788	辽宁省	沈阳市	沈阳市	沈阳市	沈北新区	沈阳东北亚国际滑雪场	马刚乡老寺沟沈阳东北亚国际风景区内	待识别	待划分	城郊体验型	GaodeAPI_text(滑雪场)	123.727	42.0427	B0FFGXL4KE	沈阳市	低海拔人工造雪型	3	0.536364	-3.54214	0.0503306	0.664297	0.295917	Ⅳ 较高	90271000	502.6	920.4	1.1764	0.167396	0.150687	0.430033	0.135881	0.220999	1	1	Ⅰ类 高资源-高产业型
722	351	山西省	忻州市	忻州市	忻州市	忻府区	云中河冰雪运动中心	秦城乡龙翔街与通岗路交叉口南侧	待识别	待划分	城市综合体室内雪场型	GaodeAPI_text(冰雪世界)	112.708	38.482	B0G22ATJQD	忻州市	低海拔人工造雪型	3	0	-3.57906	0	0.665469	0.266187	Ⅳ 较高	13433767	281	263.47	0.451175	0.0249112	0.0842478	0.1231	0.0473245	0.0698958	1	0	Ⅱ类 高资源-低产业型
723	887	黑龙江省	哈尔滨市	哈尔滨市	哈尔滨市	五常市	心悦来滑雪场	山河屯林业局大河身森林经营所	待识别	待划分	城郊体验型	GaodeAPI_text(滑雪场)	128.138	44.3877	B0FFKNY1AN	哈尔滨市	低海拔人工造雪型	3	3.125	-3.58436	0.293239	0.665637	0.442198	Ⅴ 很高	60163000	1105.69	0	0.482107	0.111564	0.331501	0	0.0511016	0.123542	1	0	Ⅱ类 高资源-低产业型
724	800	辽宁省	铁岭市	铁岭市	铁岭市	银州区	铁岭冰雪大世界(暂停营业)	柴河街道枫情水岸东侧东大桥	待识别	待划分	城市综合体室内雪场型	GaodeAPI_text(冰雪世界)	123.873	42.3044	B0JK7UR87F	铁岭市	低海拔人工造雪型	3	1.00909	-3.58471	0.0946897	0.665648	0.323073	Ⅴ 很高	7786000	55.29	226.4	0.480424	0.0144381	0.0165767	0.10578	0.0508961	0.0469226	1	0	Ⅱ类 高资源-低产业型
725	570	河北省	张家口市	张家口市	张家口市	崇礼区	密苑云顶乐园(云顶滑雪场)	四台嘴乡太子城梧桐大道	待识别	待划分	城郊体验型	GaodeAPI_text(滑雪场)	115.426	40.9503	B0JG9G5GPP	张家口市	低海拔人工造雪型	3	0.752273	-3.58835	0.0705907	0.665763	0.30866	Ⅳ 较高	19133000	213.58	405.01	1.00065	0.0354796	0.0640343	0.18923	0.11442	0.100791	1	0	Ⅱ类 高资源-低产业型
726	917	黑龙江省	大庆市	大庆市	大庆市	让胡路区	奇妙城市滑雪空间(大庆华峻生活广场店)	中原路4号华峻生活广场F1层	待识别	待划分	城市综合体室内雪场型	GaodeAPI_text(滑雪场)	124.891	46.6102	B0J1JMQMRC	大庆市	低海拔人工造雪型	3	0	-3.5905	0	0.665832	0.266333	Ⅳ 较高	28158000	65.1	0	0.411385	0.0522153	0.0195179	0	0.0424658	0.0285497	1	0	Ⅱ类 高资源-低产业型
727	58	内蒙古自治区	鄂尔多斯市	鄂尔多斯市	鄂尔多斯市	东胜区	九城宫冰雪世界(暂停开放)	九城宫旅游度假区	室内	待划分	城市综合体室内雪场型	GaodeAPI_text(冰雪乐园)	109.776	39.7994	B0FFKF9494	鄂尔多斯市	低海拔人工造雪型	3	0.0931818	-3.60188	0.00874387	0.666193	0.271723	Ⅳ 较高	63630292	327.33	222.03	0.307037	0.117994	0.0981382	0.103738	0.0297239	0.0873985	1	0	Ⅱ类 高资源-低产业型
728	548	河北省	唐山市	唐山市	唐山市	乐亭县	滑雪场(暂停营业)	菩提岛(东北角)	待识别	待划分	城郊体验型	GaodeAPI_text(滑雪场)	118.838	39.1498	B0FFKR0M7U	唐山市	低海拔人工造雪型	3	0	-3.61128	0	0.666491	0.266596	Ⅳ 较高	100039000	446.97	771.95	1.98314	0.185509	0.134008	0.360674	0.234392	0.228646	1	1	Ⅰ类 高资源-高产业型
729	799	辽宁省	铁岭市	铁岭市	铁岭市	银州区	金峰滑雪场	山咀子分场金峰小镇内	待识别	待划分	城郊体验型	GaodeAPI_text(滑雪场)	123.777	42.1991	B0FFF01N0P	铁岭市	低海拔人工造雪型	3	1.00909	-3.61979	0.0946897	0.666761	0.323518	Ⅴ 很高	7786000	55.29	226.4	0.480424	0.0144381	0.0165767	0.10578	0.0508961	0.0469226	1	0	Ⅱ类 高资源-低产业型
730	105	北京市	北京市	北京市	北京市	朝阳区	雪乐山室内滑雪(常营华联店)	朝阳北路17号BHG Mall北京华联常营购物中心F3层F3-35	室内	待划分	城市综合体室内雪场型	GaodeAPI_text(滑雪小镇)	116.597	39.9265	B0FFKQ4P51	北京市	低海拔人工造雪型	3	0	-3.63983	0	0.667398	0.266959	Ⅳ 较高	498431000	2914		4.08856	0.924275	0.873658		0.491484	0.763139	1	1	Ⅰ类 高资源-高产业型
731	166	吉林省	长春市	长春市	长春市	九台区	长春庙香山温泉滑雪度假区	庙香山风景区游客中心西侧100米	待识别	待划分	滑雪+度假综合型	GaodeAPI_text(滑雪场)	125.888	43.9605	B0JB9O1S37	长春市	低海拔人工造雪型	3	0	-3.65851	0	0.66799	0.267196	Ⅳ 较高	76321900	1381.52	910.19	0.868293	0.141529	0.414199	0.425263	0.0982586	0.269812	1	1	Ⅰ类 高资源-高产业型
732	440	新疆维吾尔自治区	伊犁哈萨克自治州	伊犁哈萨克自治州	伊犁哈萨克自治州	新源县	新源县那拉提国际滑雪场(暂停营业)	别斯托别乡哈木斯特村(那拉提机场对面)	待识别	待划分	城市综合体室内雪场型	GaodeAPI_text(冰雪世界)	83.3824	43.403	B0FFGIMNSO	伊犁哈萨克自治州	低海拔人工造雪型	3	5.50455	-3.65954	0.516528	0.668023	0.577126	Ⅴ 很高			0	0.308364			0	0.0298859	0.014943	1	0	Ⅱ类 高资源-低产业型
733	576	河北省	张家口市	张家口市	张家口市	崇礼区	阿那亚拾雪川滑雪场	万龙路168号阿那亚崇礼	待识别	待划分	城郊体验型	GaodeAPI_text(滑雪场)	115.325	40.9789	B0J6VH9UF4	张家口市	低海拔人工造雪型	3	0.752273	-3.66444	0.0705907	0.668179	0.309626	Ⅳ 较高	19133000	213.58	405.01	1.00065	0.0354796	0.0640343	0.18923	0.11442	0.100791	1	0	Ⅱ类 高资源-低产业型
734	48	内蒙古自治区	呼和浩特市	呼和浩特市	呼和浩特市	赛罕区	呼和浩特冰雪大世界(暂停开放)	金河镇102省道东侧青城乐水潮玩谷院内	待识别	待划分	城市综合体室内雪场型	GaodeAPI_text(冰雪世界)	111.797	40.7322	B0KKSU2DUS	呼和浩特市	低海拔人工造雪型	3	1.22955	-3.66563	0.115376	0.668217	0.336512	Ⅴ 很高	41070800	419.64	360.41	0.609106	0.0761604	0.125814	0.168392	0.0666094	0.109244	1	0	Ⅱ类 高资源-低产业型
735	566	河北省	张家口市	张家口市	张家口市	崇礼区	国家越野滑雪中心	奥林匹克公园	待识别	待划分	体育赛事/训练型	GaodeAPI_text(滑雪场)	115.479	40.9029	B0FFL33FNX	张家口市	低海拔人工造雪型	3	0.752273	-3.73653	0.0705907	0.670467	0.310541	Ⅴ 很高	19133000	213.58	405.01	1.00065	0.0354796	0.0640343	0.18923	0.11442	0.100791	1	0	Ⅱ类 高资源-低产业型
736	31	内蒙古自治区	乌兰察布市	乌兰察布市	乌兰察布市	集宁区	日光火山大河湾滑雪度假区(暂停营业)	白海子镇大河湾村乌兰察布日光草原·大河湾滑雪旅游度假区	待识别	待划分	滑雪+度假综合型	GaodeAPI_text(滑雪度假区)	113.179	41.2025	B0FFJWF4BS	乌兰察布市	低海拔人工造雪型	3	0.718182	-3.74162	0.0673918	0.670629	0.308686	Ⅳ 较高	12141900	195.4	160.48	0.304395	0.0225156	0.0585837	0.0749801	0.0294013	0.0463702	1	0	Ⅱ类 高资源-低产业型
737	572	河北省	张家口市	张家口市	张家口市	崇礼区	富龙滑雪场	098乡道	待识别	待划分	城郊体验型	GaodeAPI_text(滑雪场)	115.311	40.9718	B0FFHFOBUB	张家口市	低海拔人工造雪型	3	0.752273	-3.77133	0.0705907	0.671572	0.310983	Ⅴ 很高	19133000	213.58	405.01	1.00065	0.0354796	0.0640343	0.18923	0.11442	0.100791	1	0	Ⅱ类 高资源-低产业型
738	786	辽宁省	沈阳市	沈阳市	沈阳市	和平区	和平湾冰雪大世界(暂停营业)	曹仲地铁口D口东走50米领事馆路108号	待识别	待划分	城市综合体室内雪场型	GaodeAPI_text(冰雪世界)	123.362	41.7336	B0H037UO9Y	沈阳市	低海拔人工造雪型	3	0.536364	-3.77442	0.0503306	0.67167	0.298866	Ⅳ 较高	90271000	502.6	920.4	1.1764	0.167396	0.150687	0.430033	0.135881	0.220999	1	1	Ⅰ类 高资源-高产业型
739	477	新疆维吾尔自治区	阿克苏地区	阿克苏地区	阿克苏地区	温宿县	冰雪丝路温宿故事(温宿冰雪大世界)	620专用线与072乡道交叉口东南420米	待识别	待划分	城市综合体室内雪场型	GaodeAPI_text(冰雪世界)	80.1775	41.292	B0KKCL94VU	阿克苏地区	低海拔人工造雪型	3	0.654545	-3.78704	0.0614203	0.67207	0.30568	Ⅳ 较高			0	0.117211			0	0.00654434	0.00327217	1	0	Ⅱ类 高资源-低产业型
740	653	河南省	新乡市	新乡市	新乡市	辉县市	香木河滑雪场	南寨镇三郊口徐家桥	待识别	待划分	城郊体验型	GaodeAPI_text(滑雪场)	113.605	35.7923	B0FFFPL9HS	新乡市	低海拔人工造雪型	3	0.00681818	-3.791	0.000639795	0.672196	0.269262	Ⅳ 较高	35697000	222.31	612.5	2.56387	0.0661954	0.0666517	0.286175	0.305305	0.181082	1	1	Ⅰ类 高资源-高产业型
741	344	山西省	大同市	大同市	大同市	平城区	雪动力滑雪俱乐部(正德文体中心店)(暂停营业)	正德文体中心二楼	待识别	待划分	城郊体验型	GaodeAPI_text(滑雪中心)	113.284	40.0605	B0IA9RRAJD	大同市	低海拔人工造雪型	3	0.165909	-3.79768	0.0155684	0.672408	0.278304	Ⅳ 较高	18024800	290.9	307.9	0.691564	0.0334246	0.0872159	0.143858	0.0766783	0.0852943	1	0	Ⅱ类 高资源-低产业型
742	86	北京市	北京市	北京市	北京市	昌平区	SKINOW雪乐山滑雪(北京超极合生汇西区店)	超极合生汇西区L2-03B	室内	待划分	城市综合体室内雪场型	GaodeAPI_text(滑雪小镇)	116.289	40.0971	B0LGTY008S	北京市	低海拔人工造雪型	3	0	-3.80241	0	0.672558	0.269023	Ⅳ 较高	498431000	2914		4.08856	0.924275	0.873658		0.491484	0.763139	1	1	Ⅰ类 高资源-高产业型
743	564	河北省	张家口市	张家口市	张家口市	崇礼区	云顶滑雪场地公园	四台嘴乡太子城梧桐大道	待识别	待划分	城郊体验型	GaodeAPI_text(滑雪场)	115.419	40.959	B01390PDED	张家口市	低海拔人工造雪型	3	0.752273	-3.80907	0.0705907	0.67277	0.311462	Ⅴ 很高	19133000	213.58	405.01	1.00065	0.0354796	0.0640343	0.18923	0.11442	0.100791	1	0	Ⅱ类 高资源-低产业型
744	122	吉林省	吉林市	吉林市	吉林市	丰满区	五家山滑雪场(五家山森林公园东南)	通达北路和通达南路交汇处东北侧	待识别	待划分	城郊体验型	GaodeAPI_text(滑雪场)	126.721	43.7534	B01B0024JY	吉林市	低海拔人工造雪型	3	0	-3.8209	0	0.673145	0.269258	Ⅳ 较高	16332300	547.2	352.81	0.534725	0.0302861	0.164058	0.164841	0.0575268	0.104178	1	0	Ⅱ类 高资源-低产业型
745	934	内蒙古自治区	巴彦淖尔市	巴彦淖尔市		临河区	临河市有多蓝湖滑雪场		户外		城郊体验型	手工补录：锡林浩特市正达滑雪场.docx	107.443	40.6953		巴彦淖尔市	低海拔人工造雪型	3	0	-3.82967	0	0.673423	0.269369	Ⅳ 较高										1	0	Ⅱ类 高资源-低产业型
746	350	山西省	忻州市	忻州市	忻州市	五台县	五台县沟南乡锦浩滑雪场	沟南乡晨溪花苑小区东区1号	待识别	待划分	城郊体验型	GaodeAPI_text(滑雪场)	113.265	38.7104	B0KKYM0DOV	忻州市	低海拔人工造雪型	3	0	-3.86134	0	0.674429	0.269771	Ⅳ 较高	13433767	281	263.47	0.451175	0.0249112	0.0842478	0.1231	0.0473245	0.0698958	1	0	Ⅱ类 高资源-低产业型
747	168	吉林省	长春市	长春市	长春市	二道区	嗨翻运动滑雪俱乐部	天定山滑雪场北门入口301室	待识别	待划分	城郊体验型	GaodeAPI_text(滑雪场)	125.598	43.8817	B0K0511CCV	长春市	低海拔人工造雪型	3	0	-3.87174	0	0.674759	0.269904	Ⅳ 较高	76321900	1381.52	910.19	0.868293	0.141529	0.414199	0.425263	0.0982586	0.269812	1	1	Ⅰ类 高资源-高产业型
748	533	河北省	保定市	保定市	保定市	安国市	丰盈滑雪场	伍仁桥流托村光明东路54号	待识别	待划分	城郊体验型	GaodeAPI_text(滑雪场)	115.332	38.3187	B0FFIOW28I	保定市	低海拔人工造雪型	3	0.00454545	-3.87552	0.00042653	0.674879	0.270207	Ⅳ 较高	47733000	684.19	909.89	1.29013	0.0885146	0.20513	0.425123	0.149769	0.217134	1	1	Ⅰ类 高资源-高产业型
749	195	天津市	天津市	天津市	天津市	北辰区	天津市北辰区天穆镇龙曜城滑雪场(暂停营业)	普济河道119号	待识别	待划分	城郊体验型	GaodeAPI_text(滑雪场)	117.177	39.1906	B0K0HSJLOC	天津市	低海拔人工造雪型	3	0	-3.87918	0	0.674995	0.269998	Ⅳ 较高	180243200	0		2.77744	0.334237	0		0.331384	0.221874	1	1	Ⅰ类 高资源-高产业型
750	562	河北省	张家口市	张家口市	张家口市	尚义县	尚义鸳鸯湖滑雪场(暂停营业)	鸳鸯湖国际露营公园(鸳鸯湖东南岸)	待识别	待划分	城郊体验型	GaodeAPI_text(滑雪场)	114.02	41.0997	B0FFHN28PZ	张家口市	低海拔人工造雪型	3	0.752273	-3.89148	0.0705907	0.675386	0.312509	Ⅴ 很高	19133000	213.58	405.01	1.00065	0.0354796	0.0640343	0.18923	0.11442	0.100791	1	0	Ⅱ类 高资源-低产业型
751	563	河北省	张家口市	张家口市	张家口市	崇礼区	万龙滑雪场	红花梁	待识别	待划分	滑雪+度假综合型	GaodeAPI_text(滑雪场)	115.399	40.9638	B0L1KHUEFL	张家口市	低海拔人工造雪型	3	0.752273	-3.92339	0.0705907	0.676398	0.312914	Ⅴ 很高	19133000	213.58	405.01	1.00065	0.0354796	0.0640343	0.18923	0.11442	0.100791	1	0	Ⅱ类 高资源-低产业型
752	126	吉林省	吉林市	吉林市	吉林市	永吉县	吉林市永吉县北大湖滑雪度假区	北大湖镇松江中路65号	待识别	待划分	滑雪+度假综合型	GaodeAPI_text(滑雪场)	126.632	43.416	B01B00194F	吉林市	低海拔人工造雪型	3	0	-3.93236	0	0.676683	0.270673	Ⅳ 较高	16332300	547.2	352.81	0.534725	0.0302861	0.164058	0.164841	0.0575268	0.104178	1	0	Ⅱ类 高资源-低产业型
753	585	河北省	沧州市	沧州市	沧州市	任丘市	百果园梦幻冰雪王国(暂停营业)	建强驾校北500米106国道西侧	待识别	待划分	城市综合体室内雪场型	GaodeAPI_text(冰雪世界)	116.09	38.7433	B0IKSU0F8D	沧州市	低海拔人工造雪型	3	0.0204545	-3.95128	0.00191939	0.677284	0.272065	Ⅳ 较高	47228000	118.78	726.46	2.12456	0.0875781	0.0356119	0.33942	0.25166	0.178568	1	1	Ⅰ类 高资源-高产业型
754	133	吉林省	延边朝鲜族自治州	延边朝鲜族自治州	延边朝鲜族自治州	安图县	长白山和平滑雪场	二道白河镇	待识别	待划分	滑雪+度假综合型	GaodeAPI_text(滑雪场)	128.198	42.2895	B059900OVG	延边朝鲜族自治州	低海拔人工造雪型	3	2.43864	-3.97762	0.228833	0.67812	0.408548	Ⅴ 很高			189.49	0.296596			0.0885343	0.028449	0.0584916	1	0	Ⅱ类 高资源-低产业型
755	206	天津市	天津市	天津市	天津市	滨海新区	阿尔卑斯室内滑雪训练基地	滨海文化中心6层	室内	待划分	城市综合体室内雪场型	GaodeAPI_text(滑雪场)	117.686	39.0174	B0FFIQT9UE	天津市	低海拔人工造雪型	3	0	-3.99066	0	0.678534	0.271414	Ⅳ 较高	180243200	0		2.77744	0.334237	0		0.331384	0.221874	1	1	Ⅰ类 高资源-高产业型
756	207	天津市	天津市	天津市	天津市	蓟州区	天津市蓟州区盘山滑雪场	盘山文化产业园区八方桥南200米	待识别	待划分	城郊体验型	GaodeAPI_text(滑雪场)	117.292	40.0643	B00160A7B7	天津市	低海拔人工造雪型	3	0	-4.03225	0	0.679854	0.271942	Ⅳ 较高	180243200	0		2.77744	0.334237	0		0.331384	0.221874	1	1	Ⅰ类 高资源-高产业型
757	540	河北省	保定市	保定市	保定市	涞源县	涞源长城冰雪小镇(暂停营业)	上柱角石村	待识别	待划分	城市综合体室内雪场型	GaodeAPI_text(冰雪世界)	114.922	39.4915	B0FFH6CLWC	保定市	低海拔人工造雪型	3	0.00454545	-4.07452	0.00042653	0.681196	0.272734	Ⅳ 较高	47733000	684.19	909.89	1.29013	0.0885146	0.20513	0.425123	0.149769	0.217134	1	1	Ⅰ类 高资源-高产业型
758	608	河北省	秦皇岛市	秦皇岛市	秦皇岛市	海港区	老君顶滑雪场(暂停营业)	老君顶冰雪王国南侧170米	待识别	待划分	城郊体验型	GaodeAPI_text(滑雪场)	119.581	40.1511	B0GRXX9OJ3	秦皇岛市	低海拔人工造雪型	3	0	-4.07733	0	0.681285	0.272514	Ⅳ 较高	2.12856e+07	268.57	310.74	0.78704	0.0394713	0.0805211	0.145185	0.0883368	0.0883786	1	0	Ⅱ类 高资源-低产业型
759	902	黑龙江省	哈尔滨市	哈尔滨市	哈尔滨市	阿城区	上京国际滑雪场(暂停营业)	鸽子洞(301国道亚沟出口)	待识别	待划分	城郊体验型	GaodeAPI_text(滑雪场)	127.083	45.4237	B01C30IDOB	哈尔滨市	低海拔人工造雪型	3	3.125	-4.10849	0.293239	0.682274	0.448853	Ⅴ 很高	60163000	1105.69	0	0.482107	0.111564	0.331501	0	0.0511016	0.123542	1	0	Ⅱ类 高资源-低产业型
760	785	辽宁省	沈阳市	沈阳市	沈阳市	和平区	Snowavely室内滑雪冲浪(沈阳中海环宇城店)	南京南街368号沈阳中海环宇城F4层-24	室内	待划分	城市综合体室内雪场型	GaodeAPI_text(滑雪场)	123.407	41.7293	B0JBMB3P2T	沈阳市	低海拔人工造雪型	3	0.536364	-4.11685	0.0503306	0.682539	0.303214	Ⅳ 较高	90271000	502.6	920.4	1.1764	0.167396	0.150687	0.430033	0.135881	0.220999	1	1	Ⅰ类 高资源-高产业型
761	201	天津市	天津市	天津市	天津市	宝坻区	SnowWay滑雪运动空间(宝坻店)	嘉禾街嘉禾体育谷1号	待识别	待划分	城郊体验型	GaodeAPI_text(滑雪场)	117.283	39.7024	B0JUCRBN2R	天津市	低海拔人工造雪型	3	0	-4.12402	0	0.682767	0.273107	Ⅳ 较高	180243200	0		2.77744	0.334237	0		0.331384	0.221874	1	1	Ⅰ类 高资源-高产业型
762	64	北京市	北京市	北京市	北京市	丰台区	南宫冰雪奇幻小镇(暂停开放)	王佐镇南宫滨河路南宫露营运动乐园北门对面	待识别	待划分	滑雪+度假综合型	GaodeAPI_text(滑雪小镇)	116.143	39.8025	B0I23BZ622	北京市	低海拔人工造雪型	3	0	-4.13889	0	0.683239	0.273296	Ⅳ 较高	498431000	2914		4.08856	0.924275	0.873658		0.491484	0.763139	1	1	Ⅰ类 高资源-高产业型
763	604	河北省	秦皇岛市	秦皇岛市	秦皇岛市	海港区	天女小镇滑雪场	石门寨镇车厂村天女小镇内(西侧)	待识别	待划分	城郊体验型	GaodeAPI_text(滑雪场)	119.523	40.1165	B0FFIPGX5I	秦皇岛市	低海拔人工造雪型	3	0	-4.16004	0	0.68391	0.273564	Ⅳ 较高	2.12856e+07	268.57	310.74	0.78704	0.0394713	0.0805211	0.145185	0.0883368	0.0883786	1	0	Ⅱ类 高资源-低产业型
764	434	新疆维吾尔自治区	乌鲁木齐市	乌鲁木齐市	乌鲁木齐市	米东区	天山丽都滑雪场	铁厂沟镇峡门子旅游风景区	待识别	待划分	城郊体验型	GaodeAPI_text(滑雪场)	87.8521	43.9086	B03DF0SB11	乌鲁木齐市	低海拔人工造雪型	3	3.17045	-4.16744	0.297505	0.684145	0.452161	Ⅴ 很高	45021600	479.18	408.48	0.766738	0.0834866	0.143665	0.190852	0.0858578	0.125965	1	0	Ⅱ类 高资源-低产业型
765	431	新疆维吾尔自治区	乌鲁木齐市	乌鲁木齐市	乌鲁木齐市	水磨沟区	新疆红树林国际滑雪度假区	葛家沟东路666号	待识别	待划分	滑雪+度假综合型	GaodeAPI_text(滑雪度假区)	87.7791	43.8204	B0KKU7UV0Q	乌鲁木齐市	低海拔人工造雪型	3	3.17045	-4.1712	0.297505	0.684264	0.452209	Ⅴ 很高	45021600	479.18	408.48	0.766738	0.0834866	0.143665	0.190852	0.0858578	0.125965	1	0	Ⅱ类 高资源-低产业型
766	877	黑龙江省	伊春市	伊春市	伊春市	大箐山县	石猴山滑雪场	朗乡镇	待识别	待划分	城郊体验型	GaodeAPI_text(滑雪场)	128.892	46.9243	B0FFFOPB29	伊春市	低海拔人工造雪型	3	0	-4.17295	0	0.68432	0.273728	Ⅳ 较高	3704700	54.36	104.83	0.149953	0.00686988	0.0162979	0.0489791	0.0105424	0.0206723	1	0	Ⅱ类 高资源-低产业型
767	47	内蒙古自治区	呼和浩特市	呼和浩特市	呼和浩特市	玉泉区	大库伦冰雪游乐场	玉泉区大库伦村村委会北200米	待识别	待划分	城市综合体室内雪场型	GaodeAPI_text(冰雪世界)	111.645	40.7519	B0K61AOPNL	呼和浩特市	低海拔人工造雪型	3	1.22955	-4.20137	0.115376	0.685222	0.343315	Ⅴ 很高	41070800	419.64	360.41	0.609106	0.0761604	0.125814	0.168392	0.0666094	0.109244	1	0	Ⅱ类 高资源-低产业型
768	891	黑龙江省	哈尔滨市	哈尔滨市	哈尔滨市	尚志市	奇景亚布力滑雪乐园	尚志市青顶子屯2号	待识别	待划分	城郊体验型	GaodeAPI_text(滑雪场)	128.518	44.8273	B0K3OAOSOU	哈尔滨市	低海拔人工造雪型	3	3.125	-4.25967	0.293239	0.687073	0.450773	Ⅴ 很高	60163000	1105.69	0	0.482107	0.111564	0.331501	0	0.0511016	0.123542	1	0	Ⅱ类 高资源-低产业型
769	53	内蒙古自治区	赤峰市	赤峰市	赤峰市	喀喇沁旗	美林冰雪大世界(暂停开放)	美林镇中心卫生院西南侧290米	待识别	待划分	城市综合体室内雪场型	GaodeAPI_text(滑雪中心)	118.365	41.6515	B0FFKAPW5V	赤峰市	低海拔人工造雪型	3	0	-4.32347	0	0.689098	0.275639	Ⅳ 较高	23220700	201.1	396.7	0.32252	0.0430597	0.0602926	0.185348	0.0316145	0.0800787	1	0	Ⅱ类 高资源-低产业型
770	453	新疆维吾尔自治区	哈密市	哈密市	哈密市	伊州区	松树塘滑雪场(暂停营业)	天山风景名胜区旁	待识别	待划分	城市综合体室内雪场型	GaodeAPI_text(冰雪世界)	93.621	43.3692	B0386001SP	哈密市	低海拔人工造雪型	3	0	-4.33168	0	0.689359	0.275743	Ⅳ 较高	10843936	39.4	0	0.116779	0.0201087	0.0118127	0	0.00649159	0.00960323	1	0	Ⅱ类 高资源-低产业型
771	65	北京市	北京市	北京市	北京市	丰台区	草桥丰卉冰雪乐园	南四环中路256号	室内	待划分	城市综合体室内雪场型	GaodeAPI_text(冰雪世界)	116.359	39.8302	B0JK97FBKQ	北京市	低海拔人工造雪型	3	0	-4.34302	0	0.689718	0.275887	Ⅳ 较高	498431000	2914		4.08856	0.924275	0.873658		0.491484	0.763139	1	1	Ⅰ类 高资源-高产业型
772	30	内蒙古自治区	乌兰察布市	乌兰察布市	乌兰察布市	集宁区	大河湾滑雪旅游度假区	白海子镇大河湾村	待识别	待划分	滑雪+度假综合型	GaodeAPI_text(滑雪度假区)	113.183	41.2032	B0G3BCP189	乌兰察布市	低海拔人工造雪型	3	0.718182	-4.3601	0.0673918	0.690261	0.316539	Ⅴ 很高	12141900	195.4	160.48	0.304395	0.0225156	0.0585837	0.0749801	0.0294013	0.0463702	1	0	Ⅱ类 高资源-低产业型
773	883	黑龙江省	佳木斯市	佳木斯市	佳木斯市	郊区	松花江敖其湾滑雪场	敖其镇民兴村南2公里	待识别	待划分	城郊体验型	GaodeAPI_text(滑雪场)	130.156	46.7526	B0I0HZRDAM	佳木斯市	低海拔人工造雪型	3	6.17727	-4.45322	0.579655	0.693216	0.625079	Ⅴ 很高	10077000	59.7	223.5	0.381751	0.0186865	0.0178989	0.104425	0.0388472	0.0449643	1	0	Ⅱ类 高资源-低产业型
774	906	黑龙江省	哈尔滨市	哈尔滨市	哈尔滨市	阿城区	玉泉金都滑雪场(暂停营业)	玉泉镇王岗村	待识别	待划分	城郊体验型	GaodeAPI_text(滑雪场)	127.121	45.4194	B0FFFTRZI2	哈尔滨市	低海拔人工造雪型	3	3.125	-4.45602	0.293239	0.693305	0.453266	Ⅴ 很高	60163000	1105.69	0	0.482107	0.111564	0.331501	0	0.0511016	0.123542	1	0	Ⅱ类 高资源-低产业型
775	223	宁夏回族自治区	银川市	银川市	银川市	金凤区	华雁湖滑雪场	湖畔路保伏新村A区	待识别	待划分	城郊体验型	GaodeAPI_text(滑雪场)	106.24	38.4434	B0HK2SVSOX	银川市	低海拔人工造雪型	3	0	-4.46473	0	0.693582	0.277433	Ⅳ 较高	29395300	0	290.81	1.21049	0.0545097	0	0.135873	0.140044	0.0826067	1	0	Ⅱ类 高资源-低产业型
776	421	新疆维吾尔自治区	乌鲁木齐市	乌鲁木齐市	乌鲁木齐市	乌鲁木齐县	乌鲁木齐五棵松滑雪场	水西沟镇方家庄村南和路131号	待识别	待划分	城郊体验型	GaodeAPI_text(滑雪场)	87.4912	43.45	B03DF0UOJ3	乌鲁木齐市	低海拔人工造雪型	3	3.17045	-4.47138	0.297505	0.693793	0.45602	Ⅴ 很高	45021600	479.18	408.48	0.766738	0.0834866	0.143665	0.190852	0.0858578	0.125965	1	0	Ⅱ类 高资源-低产业型
777	897	黑龙江省	哈尔滨市	哈尔滨市	哈尔滨市	尚志市	深途滑雪俱乐部	雪迹滑雪俱乐部东南侧	待识别	待划分	城郊体验型	GaodeAPI_text(滑雪场)	127.454	45.2567	B0IGACU0KR	哈尔滨市	低海拔人工造雪型	3	3.125	-4.50846	0.293239	0.69497	0.453932	Ⅴ 很高	60163000	1105.69	0	0.482107	0.111564	0.331501	0	0.0511016	0.123542	1	0	Ⅱ类 高资源-低产业型
778	796	辽宁省	铁岭市	铁岭市	铁岭市	开原市	开原政府冰雪大世界	滨河景观大道滨水新城珍稀植物园(西南角)	待识别	待划分	城市综合体室内雪场型	GaodeAPI_text(雪世界)	124.066	42.5872	B0FFLDC0NC	铁岭市	低海拔人工造雪型	3	1.00909	-4.51704	0.0946897	0.695242	0.334911	Ⅴ 很高	7786000	55.29	226.4	0.480424	0.0144381	0.0165767	0.10578	0.0508961	0.0469226	1	0	Ⅱ类 高资源-低产业型
779	911	黑龙江省	哈尔滨市	哈尔滨市	哈尔滨市	香坊区	名都滑雪场	哈平路215号	待识别	待划分	城郊体验型	GaodeAPI_text(滑雪场)	126.657	45.6642	B0FFFU1QZI	哈尔滨市	低海拔人工造雪型	3	3.125	-4.52755	0.293239	0.695576	0.454174	Ⅴ 很高	60163000	1105.69	0	0.482107	0.111564	0.331501	0	0.0511016	0.123542	1	0	Ⅱ类 高资源-低产业型
780	119	北京市	北京市	北京市	北京市	顺义区	东江公园冰雪大世界	东江公园3号门	待识别	待划分	城市综合体室内雪场型	GaodeAPI_text(冰雪世界)	116.783	40.1662	B0JKT61TSZ	北京市	低海拔人工造雪型	3	0	-4.58365	0	0.697357	0.278943	Ⅳ 较高	498431000	2914		4.08856	0.924275	0.873658		0.491484	0.763139	1	1	Ⅰ类 高资源-高产业型
781	444	新疆维吾尔自治区	克孜勒苏柯尔克孜自治州	克孜勒苏柯尔克孜自治州	克孜勒苏柯尔克孜自治州	乌恰县	乌恰县云峰滑雪场	黑孜苇乡阿依布拉克村25号	待识别	待划分	滑雪+度假综合型	GaodeAPI_text(滑雪度假区)	75.291	39.6955	B0JKKHDYE4	克孜勒苏柯尔克孜自治州	低海拔人工造雪型	3	0	-4.59227	0	0.69763	0.279052	Ⅳ 较高			63.21	0.099271			0.0295332	0.00435369	0.0169435	1	0	Ⅱ类 高资源-低产业型
782	475	新疆维吾尔自治区	阿克苏地区	阿克苏地区	阿克苏地区	库车市	库车市五洲滑雪场	库车市库车市杏花公园	待识别	待划分	城市综合体室内雪场型	GaodeAPI_text(冰雪世界)	82.951	41.7288	B0H6OCSZJA	阿克苏地区	低海拔人工造雪型	3	0.654545	-4.68238	0.0614203	0.700491	0.317048	Ⅴ 很高			0	0.117211			0	0.00654434	0.00327217	1	0	Ⅱ类 高资源-低产业型
783	35	内蒙古自治区	包头市	包头市	包头市	东河区	南海滑雪场(暂停营业)	南海湿地景区内	待识别	待划分	城郊体验型	GaodeAPI_text(冰雪乐园)	110.026	40.5549	B01D80QT0C	包头市	低海拔人工造雪型	3	0	-4.70377	0	0.701169	0.280468	Ⅳ 较高	45750600	234.9	276.17	0.360691	0.0848385	0.0704263	0.129033	0.0362756	0.0801434	1	0	Ⅱ类 高资源-低产业型
784	33	内蒙古自治区	兴安盟	兴安盟	兴安盟	阿尔山市	阿尔山太伟滑雪场(暂停营业)	[]	待识别	待划分	城郊体验型	GaodeAPI_text(滑雪中心)	119.955	47.1726	B01E200254	兴安盟	低海拔人工造雪型	3	0	-4.70731	0	0.701282	0.280513	Ⅳ 较高			138.49	0.1654			0.0647059	0.0124287	0.0385673	1	0	Ⅱ类 高资源-低产业型
785	175	吉林省	长春市	长春市	长春市	朝阳区	天茂湖哈王国滑雪场冰雪乐园(暂停营业)	超越大街与城南大路交汇处	室内	待划分	城市综合体室内雪场型	GaodeAPI_text(滑雪场)	125.251	43.7621	B0JK15KF85	长春市	低海拔人工造雪型	3	0	-4.72833	0	0.701949	0.28078	Ⅳ 较高	76321900	1381.52	910.19	0.868293	0.141529	0.414199	0.425263	0.0982586	0.269812	1	1	Ⅰ类 高资源-高产业型
786	779	辽宁省	抚顺市	抚顺市	抚顺市	东洲区	紫花岭滑雪场(暂停营业)	禄霖滑雪场	待识别	待划分	城郊体验型	GaodeAPI_text(滑雪场)	124.129	41.7396	B0FFKUU7ME	抚顺市	低海拔人工造雪型	3	1.85	-4.75575	0.173598	0.702819	0.385286	Ⅴ 很高	10109000	26.85	174.8	0.41936	0.0187458	0.00805001	0.0816708	0.0434396	0.0379766	1	0	Ⅱ类 高资源-低产业型
787	167	吉林省	长春市	长春市	长春市	九台区	长春庙香山滑雪场	空港新城开发区庙香山度假区	待识别	待划分	城郊体验型	GaodeAPI_text(滑雪场)	125.889	43.9583	B01AF14F0O	长春市	低海拔人工造雪型	3	0	-4.75771	0	0.702882	0.281153	Ⅳ 较高	76321900	1381.52	910.19	0.868293	0.141529	0.414199	0.425263	0.0982586	0.269812	1	1	Ⅰ类 高资源-高产业型
788	460	新疆维吾尔自治区	塔城地区	塔城地区	塔城地区	沙湾市	阿魏滩滑雪场(暂停营业)	阿魏滩	待识别	待划分	城市综合体室内雪场型	GaodeAPI_text(冰雪世界)	85.9602	44.214	B03850LY3F	塔城地区	低海拔人工造雪型	3	8.49545	-4.80023	0.797185	0.704231	0.760004	Ⅴ 很高			109.65	0.165306			0.0512311	0.0124172	0.0318242	1	0	Ⅱ类 高资源-低产业型
789	476	新疆维吾尔自治区	阿克苏地区	阿克苏地区	阿克苏地区	拜城县	拜城冰雪大世界	巴依路与资源路交叉口西南220米	待识别	待划分	城市综合体室内雪场型	GaodeAPI_text(冰雪世界)	81.8292	41.8037	B0KKV9PPON	阿克苏地区	低海拔人工造雪型	3	0.654545	-4.83891	0.0614203	0.705459	0.319036	Ⅴ 很高			0	0.117211			0	0.00654434	0.00327217	1	0	Ⅱ类 高资源-低产业型
790	901	黑龙江省	哈尔滨市	哈尔滨市	哈尔滨市	道里区	哈尔滨冰雪乐园(暂停营业)	九站公园内江上体育活动指导中心	室内	待划分	城市综合体室内雪场型	GaodeAPI_text(冰雪世界)	126.602	45.7748	B01C31B60U	哈尔滨市	低海拔人工造雪型	3	3.125	-4.84321	0.293239	0.705596	0.458182	Ⅴ 很高	60163000	1105.69	0	0.482107	0.111564	0.331501	0	0.0511016	0.123542	1	0	Ⅱ类 高资源-低产业型
791	102	北京市	北京市	北京市	北京市	朝阳区	绿营地滑雪	高碑店路高碑店村东区D25-3	待识别	待划分	滑雪+度假综合型	GaodeAPI_text(滑雪小镇)	116.537	39.9042	B0FFKZMLV5	北京市	低海拔人工造雪型	3	0	-4.84647	0	0.705699	0.28228	Ⅳ 较高	498431000	2914		4.08856	0.924275	0.873658		0.491484	0.763139	1	1	Ⅰ类 高资源-高产业型
792	424	新疆维吾尔自治区	乌鲁木齐市	乌鲁木齐市	乌鲁木齐市	乌鲁木齐县	白云儿童滑雪场	水西沟镇白云滑雪场度假区	待识别	待划分	城郊体验型	GaodeAPI_text(滑雪场)	87.493	43.4482	B0JKY74EMT	乌鲁木齐市	低海拔人工造雪型	3	3.17045	-4.90306	0.297505	0.707495	0.461501	Ⅴ 很高	45021600	479.18	408.48	0.766738	0.0834866	0.143665	0.190852	0.0858578	0.125965	1	0	Ⅱ类 高资源-低产业型
793	747	甘肃省	张掖市	张掖市	张掖市	甘州区	新河田园综合体冰雪大世界	乌江镇元丰村六社48号	待识别	待划分	城市综合体室内雪场型	GaodeAPI_text(冰雪大世界)	100.449	39.0336	B0K6SR7C7X	张掖市	低海拔人工造雪型	3	0	-4.93129	0	0.708392	0.283357	Ⅳ 较高	6808800	185.09	110.46	0.198655	0.012626	0.0554926	0.0516096	0.0164894	0.0340544	1	0	Ⅱ类 高资源-低产业型
794	54	内蒙古自治区	赤峰市	赤峰市	赤峰市	喀喇沁旗	赤峰美林谷滑雪场(暂停营业)	美林谷运动休闲度假区内	待识别	待划分	滑雪+度假综合型	GaodeAPI_text(滑雪度假区)	118.245	41.6802	B01DC16BGD	赤峰市	低海拔人工造雪型	3	0	-4.93238	0	0.708426	0.28337	Ⅳ 较高	23220700	201.1	396.7	0.32252	0.0430597	0.0602926	0.185348	0.0316145	0.0800787	1	0	Ⅱ类 高资源-低产业型
795	892	黑龙江省	哈尔滨市	哈尔滨市	哈尔滨市	尚志市	好汉泊滑雪场	金牌大道82号	待识别	待划分	城郊体验型	GaodeAPI_text(滑雪场)	128.48	44.7824	B0J3DHG5JE	哈尔滨市	低海拔人工造雪型	3	3.125	-4.94472	0.293239	0.708818	0.459471	Ⅴ 很高	60163000	1105.69	0	0.482107	0.111564	0.331501	0	0.0511016	0.123542	1	0	Ⅱ类 高资源-低产业型
796	28	内蒙古自治区	乌兰察布市	乌兰察布市	乌兰察布市	凉城县	凉城县滑雪场冰雪游乐园	岱海镇西营村卧佛山路2排2号	待识别	待划分	城郊体验型	GaodeAPI_text(滑雪场)	112.611	40.6422	B0K6DA8T7D	乌兰察布市	低海拔人工造雪型	3	0.718182	-4.9671	0.0673918	0.709528	0.324246	Ⅴ 很高	12141900	195.4	160.48	0.304395	0.0225156	0.0585837	0.0749801	0.0294013	0.0463702	1	0	Ⅱ类 高资源-低产业型
797	426	新疆维吾尔自治区	乌鲁木齐市	乌鲁木齐市	乌鲁木齐市	乌鲁木齐县	白杨沟南山南滑雪场(暂停营业)	西白杨沟自然风景区	待识别	待划分	城郊体验型	GaodeAPI_text(滑雪场)	87.1679	43.4299	B0FFGK05HG	乌鲁木齐市	低海拔人工造雪型	3	3.17045	-4.98323	0.297505	0.71004	0.462519	Ⅴ 很高	45021600	479.18	408.48	0.766738	0.0834866	0.143665	0.190852	0.0858578	0.125965	1	0	Ⅱ类 高资源-低产业型
798	574	河北省	张家口市	张家口市	张家口市	崇礼区	翠云山银河滑雪场	大夹道沟村	待识别	待划分	城郊体验型	GaodeAPI_text(滑雪场)	115.31	40.9993	B0FFI6SQXV	张家口市	低海拔人工造雪型	3	0.752273	-4.99556	0.0705907	0.710432	0.326527	Ⅴ 很高	19133000	213.58	405.01	1.00065	0.0354796	0.0640343	0.18923	0.11442	0.100791	1	0	Ⅱ类 高资源-低产业型
799	97	北京市	北京市	北京市	北京市	朝阳区	冰丝带冰雪狂欢季	林萃路6号	待识别	待划分	城市综合体室内雪场型	GaodeAPI_text(冰雪世界)	116.378	40.0151	B0JKOAMIRV	北京市	高山雪量稳定型	1	0	-5.0403	0	0.711852	0.284741	Ⅳ 较高	498431000	2914		4.08856	0.924275	0.873658		0.491484	0.763139	1	1	Ⅰ类 高资源-高产业型
800	898	黑龙江省	哈尔滨市	哈尔滨市	哈尔滨市	尚志市	雪容融滑雪俱乐部	北环街与新建路交叉口东60米	待识别	待划分	城郊体验型	GaodeAPI_text(滑雪场)	127.96	45.2188	B0JDJUJ3GS	哈尔滨市	高山雪量稳定型	1	3.125	-5.05161	0.293239	0.712211	0.460828	Ⅴ 很高	60163000	1105.69	0	0.482107	0.111564	0.331501	0	0.0511016	0.123542	1	0	Ⅱ类 高资源-低产业型
801	900	黑龙江省	哈尔滨市	哈尔滨市	哈尔滨市	松北区	哈尔滨热雪奇迹	世茂大道99号融创茂1楼	室内	待划分	城市综合体室内雪场型	GaodeAPI_text(热雪奇迹)	126.501	45.8032	B0FFL7VUKH	哈尔滨市	高山雪量稳定型	1	3.125	-5.07347	0.293239	0.712905	0.461106	Ⅴ 很高	60163000	1105.69	0	0.482107	0.111564	0.331501	0	0.0511016	0.123542	1	0	Ⅱ类 高资源-低产业型
802	37	内蒙古自治区	包头市	包头市	包头市	九原区	宇意博园滑雪俱乐部	奥运冰雪中心一楼大厅	待识别	待划分	城郊体验型	GaodeAPI_text(滑雪中心)	109.939	40.6204	B0LB4RJY45	包头市	高山雪量稳定型	1	0	-5.08766	0	0.713355	0.285342	Ⅳ 较高	45750600	234.9	276.17	0.360691	0.0848385	0.0704263	0.129033	0.0362756	0.0801434	1	0	Ⅱ类 高资源-低产业型
803	896	黑龙江省	哈尔滨市	哈尔滨市	哈尔滨市	尚志市	新濠阳光滑雪场	金牌大道附近	待识别	待划分	城郊体验型	GaodeAPI_text(滑雪场)	128.428	44.7767	B0FFF351XF	哈尔滨市	高山雪量稳定型	1	3.125	-5.12223	0.293239	0.714452	0.461725	Ⅴ 很高	60163000	1105.69	0	0.482107	0.111564	0.331501	0	0.0511016	0.123542	1	0	Ⅱ类 高资源-低产业型
804	538	河北省	保定市	保定市	保定市	涞水县	荣盛康旅野三坡滑雪场(暂停营业)	赵各庄镇河东村村西南	待识别	待划分	城郊体验型	GaodeAPI_text(滑雪场)	115.313	39.6644	B0FFHKCQXW	保定市	高山雪量稳定型	1	0.00454545	-5.12773	0.00042653	0.714627	0.286107	Ⅳ 较高	47733000	684.19	909.89	1.29013	0.0885146	0.20513	0.425123	0.149769	0.217134	1	1	Ⅰ类 高资源-高产业型
805	57	内蒙古自治区	通辽市	通辽市	通辽市	霍林郭勒市	霍林河滑雪场(暂停营业)	观音山旅游风景区	待识别	待划分	滑雪+度假综合型	GaodeAPI_text(滑雪度假区)	119.584	45.5881	B01DB0102V	通辽市	高山雪量稳定型	1	0	-5.15499	0	0.715492	0.286197	Ⅳ 较高	16862000	223.12	280.66	0.320681	0.0312684	0.0668945	0.131131	0.03139	0.065171	1	0	Ⅱ类 高资源-低产业型
806	165	吉林省	通化市	通化市	通化市	通化县	康养谷滑雪度假村	聚鑫经济开发区赤柏松村五组	待识别	待划分	滑雪+度假综合型	GaodeAPI_text(滑雪度假区)	125.735	41.6389	B0FFIOXMEF	通化市	高山雪量稳定型	1	4.68182	-5.18361	0.439326	0.716401	0.550156	Ⅴ 很高	5767900	66.9	149.95	0.464219	0.0106958	0.0200576	0.0700603	0.0489173	0.0374327	1	0	Ⅱ类 高资源-低产业型
807	784	辽宁省	沈阳市	沈阳市	沈阳市	于洪区	丁香湖奥悦滑雪场	环湖路与元江街交叉口西南160米	待识别	待划分	城郊体验型	GaodeAPI_text(滑雪场)	123.348	41.8583	B0J6N7PQKO	沈阳市	高山雪量稳定型	1	0.536364	-5.18959	0.0503306	0.716591	0.316835	Ⅴ 很高	90271000	502.6	920.4	1.1764	0.167396	0.150687	0.430033	0.135881	0.220999	1	1	Ⅰ类 高资源-高产业型
808	802	辽宁省	鞍山市	鞍山市	鞍山市	铁东区	千山滑雪场(暂停营业)	温泉街道温泉街道倪家台村130号	待识别	待划分	城郊体验型	GaodeAPI_text(滑雪场)	123.122	41.0598	B019C017XD	鞍山市	高山雪量稳定型	1	0.684091	-5.19469	0.0641928	0.716753	0.325217	Ⅴ 很高	21563000	275.21	326.41	0.778895	0.0399858	0.0825118	0.152507	0.0873423	0.0905866	1	0	Ⅱ类 高资源-低产业型
809	40	内蒙古自治区	呼和浩特市	呼和浩特市	呼和浩特市	和林格尔县	云洲熙府冰雪大世界(暂停营业)	云鲲西街	待识别	待划分	城市综合体室内雪场型	GaodeAPI_text(冰雪世界)	111.792	40.5553	B0HKJ70Q6P	呼和浩特市	高山雪量稳定型	1	1.22955	-5.24508	0.115376	0.718352	0.356567	Ⅴ 很高	41070800	419.64	360.41	0.609106	0.0761604	0.125814	0.168392	0.0666094	0.109244	1	0	Ⅱ类 高资源-低产业型
810	130	吉林省	吉林市	吉林市	吉林市	船营区	吉雪滑雪场	大绥河镇小绥河村	待识别	待划分	城郊体验型	GaodeAPI_text(滑雪场)	126.34	43.8457	B0FFG8YQHE	吉林市	高山雪量稳定型	1	0	-5.28495	0	0.719618	0.287847	Ⅳ 较高	16332300	547.2	352.81	0.534725	0.0302861	0.164058	0.164841	0.0575268	0.104178	1	0	Ⅱ类 高资源-低产业型
811	139	吉林省	延边朝鲜族自治州	延边朝鲜族自治州	延边朝鲜族自治州	延吉市	天帝滑雪场	公园街道公园路与延西街交叉口北340米	待识别	待划分	城郊体验型	GaodeAPI_text(滑雪场)	129.497	42.9107	B0HU2ZUQN2	延边朝鲜族自治州	高山雪量稳定型	1	2.43864	-5.30558	0.228833	0.720272	0.425409	Ⅴ 很高			189.49	0.296596			0.0885343	0.028449	0.0584916	1	0	Ⅱ类 高资源-低产业型
812	470	新疆维吾尔自治区	昌吉回族自治州	昌吉回族自治州	昌吉回族自治州	阜康市	新疆冰雪大世界	城关镇	待识别	待划分	城市综合体室内雪场型	GaodeAPI_text(雪世界)	88.0435	44.1335	B0FFHOJ88S	昌吉回族自治州	高山雪量稳定型	1	7.03182	-5.30948	0.659842	0.720396	0.684064	Ⅴ 很高			0	0.222301			0	0.0193768	0.00968841	1	0	Ⅱ类 高资源-低产业型
813	154	吉林省	白山市	白山市	白山市	抚松县	小禾滑雪场(暂停营业)	东岗镇长白山池西区乡村振兴三产融合园区南560米	待识别	待划分	城郊体验型	GaodeAPI_text(滑雪场)	127.503	42.1453	B0K0D698G3	白山市	高山雪量稳定型	1	5.78409	-5.34789	0.54276	0.721615	0.614302	Ⅴ 很高	5678500	0	89.59	0.42315	0.01053	0	0.0418586	0.0439024	0.0240728	1	0	Ⅱ类 高资源-低产业型
814	157	吉林省	白山市	白山市	白山市	抚松县	长白山西坡/西景区/南坡/南景区/万达鲁能/滑雪场	天池大路与高山街交叉口东北120米	待识别	待划分	滑雪+度假综合型	GaodeAPI_text(滑雪场)	127.514	42.1514	B0L1SRRG0D	白山市	高山雪量稳定型	1	5.78409	-5.42196	0.54276	0.723967	0.615242	Ⅴ 很高	5678500	0	89.59	0.42315	0.01053	0	0.0418586	0.0439024	0.0240728	1	0	Ⅱ类 高资源-低产业型
815	147	吉林省	白城市	白城市	白城市	洮北区	到保滑雪游泳游乐场(暂停营业)	到保镇双龙村到保林场后二龙之间	待识别	待划分	城郊体验型	GaodeAPI_text(滑雪场)	123.084	45.5534	B0FFHNGRPC	白城市	高山雪量稳定型	1	0	-5.42337	0	0.724011	0.289605	Ⅳ 较高	6142400	26.73	146.75	0.332848	0.0113903	0.00801403	0.0685652	0.0328757	0.0302113	1	0	Ⅱ类 高资源-低产业型
816	142	吉林省	延边朝鲜族自治州	延边朝鲜族自治州	延边朝鲜族自治州	敦化市	雪乡滑雪场	黑龙江森工大海林林业局双峰林场Z036附近	待识别	待划分	城郊体验型	GaodeAPI_text(滑雪场)	128.212	44.3336	B0FFG2WPXE	延边朝鲜族自治州	高山雪量稳定型	1	2.43864	-5.45867	0.228833	0.725132	0.427353	Ⅴ 很高			189.49	0.296596			0.0885343	0.028449	0.0584916	1	0	Ⅱ类 高资源-低产业型
817	468	新疆维吾尔自治区	昌吉回族自治州	昌吉回族自治州	昌吉回族自治州	昌吉市	龙山滑雪场	乌伊西路18公里老阿什里乡政府南	待识别	待划分	城郊体验型	GaodeAPI_text(滑雪场)	87.0121	43.9124	B03E20M61E	昌吉回族自治州	高山雪量稳定型	1	7.03182	-5.47239	0.659842	0.725567	0.686132	Ⅴ 很高			0	0.222301			0	0.0193768	0.00968841	1	0	Ⅱ类 高资源-低产业型
818	920	黑龙江省	牡丹江市	牡丹江市	牡丹江市	东安区	牡丹峰滑雪场	牡丹峰森林公园内	待识别	待划分	城郊体验型	GaodeAPI_text(滑雪场)	129.75	44.4632	B01C502AL4	牡丹江市	高山雪量稳定型	1	6.55455	-5.52888	0.615057	0.72736	0.659978	Ⅴ 很高	10513600	79.9	238.16	0.293006	0.0194961	0.0239551	0.111274	0.0280106	0.045684	1	0	Ⅱ类 高资源-低产业型
819	923	黑龙江省	牡丹江市	牡丹江市	牡丹江市	西安区	中兴滑雪场	牡海公路中兴村	待识别	待划分	城郊体验型	GaodeAPI_text(滑雪场)	129.422	44.5352	B0FFK3N29P	牡丹江市	高山雪量稳定型	1	6.55455	-5.5329	0.615057	0.727488	0.660029	Ⅴ 很高	10513600	79.9	238.16	0.293006	0.0194961	0.0239551	0.111274	0.0280106	0.045684	1	0	Ⅱ类 高资源-低产业型
820	162	吉林省	通化市	通化市	通化市	东昌区	通化千叶湖滑雪场	江雪路1588号千叶湖风景区内(西侧)	待识别	待划分	城郊体验型	GaodeAPI_text(滑雪场)	125.953	41.6997	B01B30MOX9	通化市	高山雪量稳定型	1	4.68182	-5.5451	0.439326	0.727875	0.554746	Ⅴ 很高	5767900	66.9	149.95	0.464219	0.0106958	0.0200576	0.0700603	0.0489173	0.0374327	1	0	Ⅱ类 高资源-低产业型
821	894	黑龙江省	哈尔滨市	哈尔滨市	哈尔滨市	尚志市	帽儿山高山滑雪场	尚志哈体院帽儿山高山滑雪场酒店1层	待识别	待划分	体育赛事/训练型	GaodeAPI_text(滑雪场)	127.454	45.2576	B0FFK1Q8RM	哈尔滨市	高山雪量稳定型	1	3.125	-5.5588	0.293239	0.72831	0.467268	Ⅴ 很高	60163000	1105.69	0	0.482107	0.111564	0.331501	0	0.0511016	0.123542	1	0	Ⅱ类 高资源-低产业型
822	903	黑龙江省	哈尔滨市	哈尔滨市	哈尔滨市	阿城区	兴旺滑雪场(暂停营业)	玉泉镇(哈阿高速亚沟出口下)	待识别	待划分	城郊体验型	GaodeAPI_text(滑雪场)	127.133	45.4216	B01C317ED8	哈尔滨市	高山雪量稳定型	1	3.125	-5.57355	0.293239	0.728778	0.467455	Ⅴ 很高	60163000	1105.69	0	0.482107	0.111564	0.331501	0	0.0511016	0.123542	1	0	Ⅱ类 高资源-低产业型
823	265	山东省	济南市	济南市	济南市	历下区	爱飞驰城市滑雪空间(全运村店)	全运村中央广场1层中庭1011号	待识别	待划分	城市综合体室内雪场型	GaodeAPI_text(滑雪场)	117.121	36.6447	B0H3US83YP	济南市	高山雪量稳定型	1	0.0954545	-5.62986	0.00895713	0.730566	0.297601	Ⅳ 较高	135276000	702.8	943.7	2.22687	0.250852	0.210709	0.440919	0.264154	0.291659	1	1	Ⅰ类 高资源-高产业型
824	919	黑龙江省	牡丹江市	牡丹江市	牡丹江市	东安区	大湾滑雪场(彩虹滑道乐园)(暂停营业)	兴隆街道大湾村(大湾水世界南)	待识别	待划分	城郊体验型	GaodeAPI_text(滑雪场)	129.664	44.579	B0FFHL8BBB	牡丹江市	高山雪量稳定型	1	6.55455	-5.69122	0.615057	0.732514	0.662039	Ⅴ 很高	10513600	79.9	238.16	0.293006	0.0194961	0.0239551	0.111274	0.0280106	0.045684	1	0	Ⅱ类 高资源-低产业型
825	943	新疆维吾尔自治区	吐鲁番市	吐鲁番市		高昌区	叶鲁番市亚尔果勒滑雪场		户外		城郊体验型	手工补录：锡林浩特市正达滑雪场.docx	89.091	42.9451		吐鲁番市	高山雪量稳定型	1	0.352273	-5.69583	0.0330561	0.73266	0.312898	Ⅴ 很高										1	0	Ⅱ类 高资源-低产业型
826	46	内蒙古自治区	呼和浩特市	呼和浩特市	呼和浩特市	玉泉区	南湖乐众冰雪世界	湿地公园内广场路北或观澜国际南门	室内	待划分	城市综合体室内雪场型	GaodeAPI_text(雪世界)	111.654	40.76	B0H0YUIA3D	呼和浩特市	高山雪量稳定型	1	1.22955	-5.72581	0.115376	0.733612	0.362671	Ⅴ 很高	41070800	419.64	360.41	0.609106	0.0761604	0.125814	0.168392	0.0666094	0.109244	1	0	Ⅱ类 高资源-低产业型
827	464	新疆维吾尔自治区	巴音郭楞蒙古自治州	巴音郭楞蒙古自治州	巴音郭楞蒙古自治州	库尔勒市	龙之山东归滑雪场(暂停营业)	龙山东归塔北侧	待识别	待划分	城市综合体室内雪场型	GaodeAPI_text(冰雪世界)	86.1909	41.7755	B0FFGA342B	巴音郭楞蒙古自治州	高山雪量稳定型	1	0.390909	-5.73289	0.0366816	0.733836	0.315543	Ⅴ 很高			0	0.063617			0	0	0	1	0	Ⅱ类 高资源-低产业型
828	174	吉林省	长春市	长春市	长春市	宽城区	北城冰雪水上大世界	青年公园	待识别	待划分	城市综合体室内雪场型	GaodeAPI_text(冰雪世界)	125.309	43.968	B0GR3OM6EC	长春市	高山雪量稳定型	1	0	-5.74601	0	0.734253	0.293701	Ⅳ 较高	76321900	1381.52	910.19	0.868293	0.141529	0.414199	0.425263	0.0982586	0.269812	1	1	Ⅰ类 高资源-高产业型
829	150	吉林省	白城市	白城市	白城市	洮南市	西郊公园冰雪乐园(暂停营业)	洮突路与西二环交叉口西500米	室内	待划分	城市综合体室内雪场型	GaodeAPI_text(冰雪世界)	122.754	45.3326	B0J63U35N2	白城市	高山雪量稳定型	1	0	-5.74884	0	0.734343	0.293737	Ⅳ 较高	6142400	26.73	146.75	0.332848	0.0113903	0.00801403	0.0685652	0.0328757	0.0302113	1	0	Ⅱ类 高资源-低产业型
830	176	吉林省	长春市	长春市	长春市	榆树市	富越山滑雪场(暂停营业)	环城乡福安村一组	待识别	待划分	城郊体验型	GaodeAPI_text(滑雪场)	126.61	44.7818	B0FFK4CJ6K	长春市	高山雪量稳定型	1	0	-5.75464	0	0.734527	0.293811	Ⅳ 较高	76321900	1381.52	910.19	0.868293	0.141529	0.414199	0.425263	0.0982586	0.269812	1	1	Ⅰ类 高资源-高产业型
831	136	吉林省	延边朝鲜族自治州	延边朝鲜族自治州	延边朝鲜族自治州	安图县	长白山高原冰雪训练基地	二道白河镇长白山自然保护区	待识别	待划分	体育赛事/训练型	GaodeAPI_text(滑雪场)	128.07	42.0735	B01B70MDBZ	延边朝鲜族自治州	高山雪量稳定型	1	2.43864	-5.76356	0.228833	0.73481	0.431224	Ⅴ 很高			189.49	0.296596			0.0885343	0.028449	0.0584916	1	0	Ⅱ类 高资源-低产业型
832	442	新疆维吾尔自治区	伊犁哈萨克自治州	伊犁哈萨克自治州	伊犁哈萨克自治州	霍城县	中华福寿山滑雪度假小镇滑雪场(暂停营业)	大西沟乡	待识别	待划分	滑雪+度假综合型	GaodeAPI_text(滑雪度假区)	80.7371	44.3852	B0IB37AWWP	伊犁哈萨克自治州	高山雪量稳定型	1	5.50455	-5.81081	0.516528	0.73631	0.604441	Ⅴ 很高			0	0.308364			0	0.0298859	0.014943	1	0	Ⅱ类 高资源-低产业型
833	112	北京市	北京市	北京市	北京市	石景山区	启迪冰雪体育中心	石景山路与上庄大街交汇八宝山地铁站A口北50米市民冰雪体育中心	待识别	待划分	城市综合体室内雪场型	GaodeAPI_text(冰雪世界)	116.235	39.9092	B0FFKV418I	北京市	高山雪量稳定型	1	0	-5.8576	0	0.737795	0.295118	Ⅳ 较高	498431000	2914		4.08856	0.924275	0.873658		0.491484	0.763139	1	1	Ⅰ类 高资源-高产业型
834	447	新疆维吾尔自治区	博尔塔拉蒙古自治州	博尔塔拉蒙古自治州	博尔塔拉蒙古自治州	博乐市	乐淘淘滑雪场(暂停营业)	八十四团	待识别	待划分	城郊体验型	GaodeAPI_text(滑雪场)	82.2214	45.1663	B0FFH0HB1J	博尔塔拉蒙古自治州	高山雪量稳定型	1	8.025	-5.87819	0.753039	0.738449	0.747203	Ⅴ 很高			0	0.201027			0	0.0167791	0.00838954	1	0	Ⅱ类 高资源-低产业型
835	481	新疆维吾尔自治区	阿勒泰地区	阿勒泰地区	阿勒泰地区	哈巴河县	白桦林景区冰雪乐园	白桦林景区	室内	待划分	城市综合体室内雪场型	GaodeAPI_text(冰雪世界)	86.3388	48.0736	B0IKJC75K3	阿勒泰地区	高山雪量稳定型	1	10.6568	-5.91486	1	0.739613	0.895845	Ⅴ 很高			0	0.119548			0	0.00682971	0.00341485	1	0	Ⅱ类 高资源-低产业型
836	446	新疆维吾尔自治区	克拉玛依市	克拉玛依市	克拉玛依市	独山子区	油田那仁王滑雪场(暂停营业)	油田那仁王农家乐滑雪场	待识别	待划分	城市综合体室内雪场型	GaodeAPI_text(冰雪世界)	84.8749	44.2896	B03DE0LQ1D	克拉玛依市	高山雪量稳定型	1	1.24318	-5.9859	0.116656	0.741867	0.366741	Ⅴ 很高	13270000	36.61	48.9	0.592293	0.0246075	0.0109762	0.0228473	0.0645564	0.0307468	1	0	Ⅱ类 高资源-低产业型
837	899	黑龙江省	哈尔滨市	哈尔滨市	哈尔滨市	平房区	天龙湖滑雪场(暂停营业)	[]	待识别	待划分	城郊体验型	GaodeAPI_text(滑雪场)	126.701	45.5707	B0K0TUOS6I	哈尔滨市	高山雪量稳定型	1	3.125	-5.98769	0.293239	0.741924	0.472713	Ⅴ 很高	60163000	1105.69	0	0.482107	0.111564	0.331501	0	0.0511016	0.123542	1	0	Ⅱ类 高资源-低产业型
838	170	吉林省	长春市	长春市	长春市	二道区	莲花山滑雪场	四家乡青山村	待识别	待划分	城郊体验型	GaodeAPI_text(滑雪场)	125.747	43.861	B01AF08820	长春市	高山雪量稳定型	1	0	-5.98848	0	0.741949	0.29678	Ⅳ 较高	76321900	1381.52	910.19	0.868293	0.141529	0.414199	0.425263	0.0982586	0.269812	1	1	Ⅰ类 高资源-高产业型
839	429	新疆维吾尔自治区	乌鲁木齐市	乌鲁木齐市	乌鲁木齐市	新市区	乌鲁木齐市植物园-冰雪大世界(暂停营业)	杭州路街道杭州路街道北京中路916号(喀什路与北京路交汇处)植物园内	待识别	待划分	城市综合体室内雪场型	GaodeAPI_text(冰雪世界)	87.5548	43.8903	B0FFLPWRRJ	乌鲁木齐市	高山雪量稳定型	1	3.17045	-6.02141	0.297505	0.742994	0.475701	Ⅴ 很高	45021600	479.18	408.48	0.766738	0.0834866	0.143665	0.190852	0.0858578	0.125965	1	0	Ⅱ类 高资源-低产业型
840	471	新疆维吾尔自治区	石河子市	石河子市	石河子市	石河子市	石河子市卧龙山旅游滑雪场(暂停营业)	兵团一五二团卧龙山	待识别	待划分	滑雪+度假综合型	GaodeAPI_text(滑雪度假区)	86.0246	44.211	B0FFFQ4C7Y	石河子市	高山雪量稳定型	1	0	-6.03035	0	0.743278	0.297311	Ⅳ 较高				2.36464				0.280977	0.280977	1	1	Ⅰ类 高资源-高产业型
841	886	黑龙江省	哈尔滨市	哈尔滨市	哈尔滨市	五常市	中国雪谷双雁滑雪场	山河屯林业局长青林场	待识别	待划分	城郊体验型	GaodeAPI_text(滑雪场)	128.056	44.4499	B0FFK1905N	哈尔滨市	高山雪量稳定型	1	3.125	-6.0488	0.293239	0.743864	0.473489	Ⅴ 很高	60163000	1105.69	0	0.482107	0.111564	0.331501	0	0.0511016	0.123542	1	0	Ⅱ类 高资源-低产业型
842	146	吉林省	松原市	松原市	松原市	前郭尔罗斯蒙古族自治县	松原成吉思汗文化园冰雪乐园	郭尔罗斯大路成吉思汗文化园(西南角)	室内	待划分	城市综合体室内雪场型	GaodeAPI_text(冰雪世界)	124.864	45.0959	B0FFJYGN2T	松原市	高山雪量稳定型	1	0	-6.06466	0	0.744368	0.297747	Ⅳ 较高	10021800	76.66	212.57	0.34847	0.0185841	0.0229838	0.0993179	0.0347833	0.0439172	1	0	Ⅱ类 高资源-低产业型
843	908	黑龙江省	哈尔滨市	哈尔滨市	哈尔滨市	阿城区	花果山滑雪场	G10绥满高速动物园收费站自哈尔滨方向下高速匝道前行50米右手边上山道路	待识别	待划分	城郊体验型	GaodeAPI_text(滑雪场)	127.124	45.3952	B0FFF33T7X	哈尔滨市	高山雪量稳定型	1	3.125	-6.11042	0.293239	0.74582	0.474272	Ⅴ 很高	60163000	1105.69	0	0.482107	0.111564	0.331501	0	0.0511016	0.123542	1	0	Ⅱ类 高资源-低产业型
844	479	新疆维吾尔自治区	阿克苏地区	阿克苏地区	阿克苏地区	阿克苏市	阿克苏市西湖滑雪场(暂停营业)	西大桥往乌什县方向7公里306省道嘉兴水泥制品厂斜对面	待识别	待划分	城市综合体室内雪场型	GaodeAPI_text(冰雪世界)	80.1845	41.1215	B03E50MAKT	阿克苏地区	高山雪量稳定型	1	0.654545	-6.11728	0.0614203	0.746038	0.335267	Ⅴ 很高			0	0.117211			0	0.00654434	0.00327217	1	0	Ⅱ类 高资源-低产业型
845	138	吉林省	延边朝鲜族自治州	延边朝鲜族自治州	延边朝鲜族自治州	延吉市	国贸民俗村滑雪场	国贸高尔夫练习场旁	待识别	待划分	城郊体验型	GaodeAPI_text(滑雪场)	129.465	42.8755	B0599000BS	延边朝鲜族自治州	高山雪量稳定型	1	2.43864	-6.19696	0.228833	0.748567	0.436727	Ⅴ 很高			189.49	0.296596			0.0885343	0.028449	0.0584916	1	0	Ⅱ类 高资源-低产业型
846	448	新疆维吾尔自治区	博尔塔拉蒙古自治州	博尔塔拉蒙古自治州	博尔塔拉蒙古自治州	博乐市	博州赛里木湖滑雪场	赛里木湖国际滑雪度假区	待识别	待划分	滑雪+度假综合型	GaodeAPI_text(滑雪度假区)	81.426	44.5898	B0LDO52SCC	博尔塔拉蒙古自治州	高山雪量稳定型	1	8.025	-6.20445	0.753039	0.748805	0.751345	Ⅴ 很高			0	0.201027			0	0.0167791	0.00838954	1	0	Ⅱ类 高资源-低产业型
847	472	新疆维吾尔自治区	石河子市	石河子市	石河子市	石河子市	石河子市高新区将军山滑雪场(暂停营业)	石河子市高新区152团10连将军山脚下	待识别	待划分	城市综合体室内雪场型	GaodeAPI_text(冰雪世界)	86.0925	44.1972	B03E10LQ41	石河子市	高山雪量稳定型	1	0	-6.23545	0	0.749789	0.299915	Ⅳ 较高				2.36464				0.280977	0.280977	1	1	Ⅰ类 高资源-高产业型
848	924	黑龙江省	绥化市	绥化市	绥化市	兰西县	八岔沟滑雪度假小镇(暂停营业)	[]	待识别	待划分	滑雪+度假综合型	GaodeAPI_text(滑雪小镇)	126.333	46.1115	B0KKMHJVZO	绥化市	高山雪量稳定型	1	0	-6.26233	0	0.750642	0.300257	Ⅳ 较高	12440000	0	356	0.292913	0.0230683	0	0.166332	0.0279992	0.0543498	1	0	Ⅱ类 高资源-低产业型
849	439	新疆维吾尔自治区	伊犁哈萨克自治州	伊犁哈萨克自治州	伊犁哈萨克自治州	伊宁市	阿勒玛滑雪场	巴彦岱镇苏阿拉木图村村委会院内	待识别	待划分	城市综合体室内雪场型	GaodeAPI_text(冰雪世界)	81.2899	44.2107	B0FFJVUY5S	伊犁哈萨克自治州	高山雪量稳定型	1	5.50455	-6.34419	0.516528	0.75324	0.611213	Ⅴ 很高			0	0.308364			0	0.0298859	0.014943	1	0	Ⅱ类 高资源-低产业型
850	932	黑龙江省	齐齐哈尔市	齐齐哈尔市	齐齐哈尔市	碾子山区	雅鲁河冰雪乐园(暂停开放)	富强街道碾华公路金蛇湾民族村附近	室内	待划分	城市综合体室内雪场型	GaodeAPI_text(冰雪世界)	122.835	47.5435	B0FFIQZPAG	齐齐哈尔市	高山雪量稳定型	1	3.09545	-6.3482	0.290467	0.753368	0.475627	Ⅴ 很高	13531000	102.5	509	0.306944	0.0250915	0.0307309	0.237817	0.0297125	0.080838	1	0	Ⅱ类 高资源-低产业型
851	145	吉林省	松原市	松原市	松原市	前郭尔罗斯蒙古族自治县	冰雪嘉年华	查干湖生态小镇东北侧110米	待识别	待划分	城市综合体室内雪场型	GaodeAPI_text(冰雪世界)	124.545	45.282	B0JBL1PNU4	松原市	高山雪量稳定型	1	0	-6.3789	0	0.754342	0.301737	Ⅳ 较高	10021800	76.66	212.57	0.34847	0.0185841	0.0229838	0.0993179	0.0347833	0.0439172	1	0	Ⅱ类 高资源-低产业型
852	927	黑龙江省	鸡西市	鸡西市	鸡西市	鸡冠区	鸡西动植物园滑雪场(暂停营业)	向南街43号鸡西动植物园	待识别	待划分	城郊体验型	GaodeAPI_text(滑雪场)	130.901	45.3041	B01D30LXY7	鸡西市	高山雪量稳定型	1	0	-6.37938	0	0.754358	0.301743	Ⅳ 较高	6226000	55.4	160.96	0.603947	0.0115453	0.0166097	0.0752044	0.0659794	0.0423347	1	0	Ⅱ类 高资源-低产业型
853	51	内蒙古自治区	呼和浩特市	呼和浩特市	呼和浩特市	赛罕区	马鬃山滑雪场	榆林镇石门沟村内	待识别	待划分	城郊体验型	GaodeAPI_text(滑雪场)	112.109	40.8706	B0HKP79UFY	呼和浩特市	高山雪量稳定型	1	1.22955	-6.39218	0.115376	0.754764	0.371131	Ⅴ 很高	41070800	419.64	360.41	0.609106	0.0761604	0.125814	0.168392	0.0666094	0.109244	1	0	Ⅱ类 高资源-低产业型
854	915	黑龙江省	大庆市	大庆市	大庆市	让胡路区	大庆市让胡路区飞天滑雪场(暂停开放)	西宾街道西湖街140号	待识别	待划分	滑雪+度假综合型	GaodeAPI_text(滑雪场)	124.862	46.6002	B0FFF4YC1Q	大庆市	高山雪量稳定型	1	0	-6.41563	0	0.755508	0.302203	Ⅳ 较高	28158000	65.1	0	0.411385	0.0522153	0.0195179	0	0.0424658	0.0285497	1	0	Ⅱ类 高资源-低产业型
855	134	吉林省	延边朝鲜族自治州	延边朝鲜族自治州	延边朝鲜族自治州	安图县	长白山火山大峡谷滑雪场	二道白河镇长胜村	待识别	待划分	城郊体验型	GaodeAPI_text(滑雪场)	128.071	42.5048	B0K0TKRVAL	延边朝鲜族自治州	高山雪量稳定型	1	2.43864	-6.4288	0.228833	0.755926	0.439671	Ⅴ 很高			189.49	0.296596			0.0885343	0.028449	0.0584916	1	0	Ⅱ类 高资源-低产业型
856	81	北京市	北京市	北京市	北京市	怀柔区	北京怀北国际滑雪场	怀北镇河防口村548号	待识别	待划分	城郊体验型	GaodeAPI_text(滑雪场)	116.656	40.4474	B000A04209	北京市	高山雪量稳定型	1	0	-6.46889	0	0.757199	0.30288	Ⅳ 较高	498431000	2914		4.08856	0.924275	0.873658		0.491484	0.763139	1	1	Ⅰ类 高资源-高产业型
857	801	辽宁省	阜新市	阜新市	阜新市	细河区	黄家沟滑雪场	黄家沟村黄家沟度假区	待识别	待划分	滑雪+度假综合型	GaodeAPI_text(滑雪度假区)	121.611	42.0666	B0FFGIIQ5G	阜新市	高山雪量稳定型	1	0.209091	-6.47208	0.0196204	0.7573	0.314692	Ⅴ 很高	6503000	64.1	176.7	0.509521	0.012059	0.0192181	0.0825585	0.0544491	0.0420712	1	0	Ⅱ类 高资源-低产业型
858	875	黑龙江省	七台河市	七台河市	七台河市	桃山区	万宝山滑雪场	山湖大街南侧	待识别	待划分	滑雪+度假综合型	GaodeAPI_text(滑雪场)	131	45.7421	B0J0JHFX9L	七台河市	高山雪量稳定型	1	7.32955	-6.48411	0.68778	0.757682	0.715741	Ⅴ 很高	2366000	0	0	0.355375	0.00438744	0	0	0.0356264	0.0100035	1	0	Ⅱ类 高资源-低产业型
859	922	黑龙江省	牡丹江市	牡丹江市	牡丹江市	海林市	横道滑雪场	横道河子镇俄罗斯风情园内	待识别	待划分	城郊体验型	GaodeAPI_text(滑雪场)	129.126	44.7742	B01C501PST	牡丹江市	高山雪量稳定型	1	6.55455	-6.49191	0.615057	0.757929	0.672206	Ⅴ 很高	10513600	79.9	238.16	0.293006	0.0194961	0.0239551	0.111274	0.0280106	0.045684	1	0	Ⅱ类 高资源-低产业型
860	131	吉林省	吉林市	吉林市	吉林市	龙潭区	鸣山绿洲滑雪场	天泰村一队	待识别	待划分	城郊体验型	GaodeAPI_text(滑雪场)	126.665	43.8853	B01B00PHWF	吉林市	高山雪量稳定型	1	0	-6.52598	0	0.759011	0.303604	Ⅳ 较高	16332300	547.2	352.81	0.534725	0.0302861	0.164058	0.164841	0.0575268	0.104178	1	0	Ⅱ类 高资源-低产业型
861	916	黑龙江省	大庆市	大庆市	大庆市	让胡路区	大庆市银湖山滑雪场	[]	待识别	待划分	城郊体验型	GaodeAPI_text(滑雪场)	124.796	46.5263	B0J6JHABN4	大庆市	高山雪量稳定型	1	0	-6.55217	0	0.759842	0.303937	Ⅳ 较高	28158000	65.1	0	0.411385	0.0522153	0.0195179	0	0.0424658	0.0285497	1	0	Ⅱ类 高资源-低产业型
862	905	黑龙江省	哈尔滨市	哈尔滨市	哈尔滨市	阿城区	玉泉国际滑雪场	玉泉镇(近新民屯)	待识别	待划分	城郊体验型	GaodeAPI_text(滑雪场)	127.211	45.4041	B0FFFEP2ZG	哈尔滨市	高山雪量稳定型	1	3.125	-6.56219	0.293239	0.76016	0.480008	Ⅴ 很高	60163000	1105.69	0	0.482107	0.111564	0.331501	0	0.0511016	0.123542	1	0	Ⅱ类 高资源-低产业型
863	789	辽宁省	沈阳市	沈阳市	沈阳市	沈北新区	沈阳东北亚滑雪场(暂停营业)	沈阳东北亚国际风景区正门旁	待识别	待划分	城郊体验型	GaodeAPI_text(滑雪场)	123.722	42.0485	B0L65ZNHGR	沈阳市	高山雪量稳定型	1	0.536364	-6.57339	0.0503306	0.760516	0.334405	Ⅴ 很高	90271000	502.6	920.4	1.1764	0.167396	0.150687	0.430033	0.135881	0.220999	1	1	Ⅰ类 高资源-高产业型
864	422	新疆维吾尔自治区	乌鲁木齐市	乌鲁木齐市	乌鲁木齐市	乌鲁木齐县	天山小峡谷滑雪场	灯草沟村	待识别	待划分	城郊体验型	GaodeAPI_text(滑雪场)	87.3696	43.4156	B0FFKDEUMR	乌鲁木齐市	高山雪量稳定型	1	3.17045	-6.60273	0.297505	0.761447	0.483082	Ⅴ 很高	45021600	479.18	408.48	0.766738	0.0834866	0.143665	0.190852	0.0858578	0.125965	1	0	Ⅱ类 高资源-低产业型
865	129	吉林省	吉林市	吉林市	吉林市	船营区	吉林北山四季越野滑雪场	越山路15号	待识别	待划分	体育赛事/训练型	GaodeAPI_text(滑雪场)	126.526	43.8394	B0JU6M0IUY	吉林市	高山雪量稳定型	1	0	-6.61123	0	0.761717	0.304687	Ⅳ 较高	16332300	547.2	352.81	0.534725	0.0302861	0.164058	0.164841	0.0575268	0.104178	1	0	Ⅱ类 高资源-低产业型
866	928	黑龙江省	鹤岗市	鹤岗市	鹤岗市	萝北县	萝北县凤凰山滑雪场	凤凰山	待识别	待划分	城郊体验型	GaodeAPI_text(滑雪场)	130.84	47.6016	B0IBARV4JX	鹤岗市	高山雪量稳定型	1	7.22727	-6.64212	0.678183	0.762698	0.711989	Ⅴ 很高	3802000	14.2	93.5	0.247844	0.00705031	0.00425736	0.0436855	0.0224959	0.0193723	1	0	Ⅱ类 高资源-低产业型
867	465	新疆维吾尔自治区	昌吉回族自治州	昌吉回族自治州	昌吉回族自治州	吉木萨尔县	丝路北庭滑雪场(暂停营业)	新通检测站斜对面	待识别	待划分	城市综合体室内雪场型	GaodeAPI_text(冰雪世界)	89.1119	43.99	B0FFK8BXX6	昌吉回族自治州	高山雪量稳定型	1	7.03182	-6.71853	0.659842	0.765123	0.701954	Ⅴ 很高			0	0.222301			0	0.0193768	0.00968841	1	0	Ⅱ类 高资源-低产业型
868	575	河北省	张家口市	张家口市	张家口市	崇礼区	长城岭银河滑雪场(暂停营业)	101乡道和平森林公园(近和平森林公园)	待识别	待划分	城郊体验型	GaodeAPI_text(滑雪场)	115.461	41.0088	B013902C7C	张家口市	高山雪量稳定型	1	0.752273	-6.7293	0.0705907	0.765465	0.34854	Ⅴ 很高	19133000	213.58	405.01	1.00065	0.0354796	0.0640343	0.18923	0.11442	0.100791	1	0	Ⅱ类 高资源-低产业型
869	551	河北省	唐山市	唐山市	唐山市	路北区	弯道山滑雪场	缸窑路92号弯道山公园内(北侧)	待识别	待划分	城郊体验型	GaodeAPI_text(滑雪场)	118.206	39.6711	B013B03BFR	唐山市	高山雪量稳定型	1	0	-6.75383	0	0.766243	0.306497	Ⅳ 较高	100039000	446.97	771.95	1.98314	0.185509	0.134008	0.360674	0.234392	0.228646	1	1	Ⅰ类 高资源-高产业型
870	486	新疆维吾尔自治区	阿勒泰地区	阿勒泰地区	阿勒泰地区	阿勒泰市	将军山国际滑雪度假区	将军山路40号	待识别	待划分	滑雪+度假综合型	GaodeAPI_text(滑雪度假区)	88.161	47.8458	B0FFFPTZKE	阿勒泰地区	高山雪量稳定型	1	10.6568	-6.76514	1	0.766603	0.906641	Ⅴ 很高			0	0.119548			0	0.00682971	0.00341485	1	0	Ⅱ类 高资源-低产业型
871	910	黑龙江省	哈尔滨市	哈尔滨市	哈尔滨市	阿城区	霜雪滑雪场	西山屯高速公路玉泉出口左拐3公里	待识别	待划分	城郊体验型	GaodeAPI_text(滑雪场)	127.139	45.4181	B01C317FFG	哈尔滨市	高山雪量稳定型	1	3.125	-6.81046	0.293239	0.768041	0.48316	Ⅴ 很高	60163000	1105.69	0	0.482107	0.111564	0.331501	0	0.0511016	0.123542	1	0	Ⅱ类 高资源-低产业型
872	783	辽宁省	沈阳市	沈阳市	沈阳市	于洪区	丁香小镇citypark滑雪公园(暂停营业)	元江街62-1号(近10号线地铁口丁香湖站)	待识别	待划分	城郊体验型	GaodeAPI_text(滑雪场)	123.347	41.8581	B0J395CZS3	沈阳市	高山雪量稳定型	1	0.536364	-6.87554	0.0503306	0.770107	0.338241	Ⅴ 很高	90271000	502.6	920.4	1.1764	0.167396	0.150687	0.430033	0.135881	0.220999	1	1	Ⅰ类 高资源-高产业型
873	171	吉林省	长春市	长春市	长春市	南关区	净月潭滑雪场	玉潭镇净月大街5840号净月潭国家森林公园内(东南角)	待识别	待划分	城郊体验型	GaodeAPI_text(滑雪场)	125.474	43.7656	B0G0FS99I5	长春市	高山雪量稳定型	1	0	-6.92124	0	0.771557	0.308623	Ⅳ 较高	76321900	1381.52	910.19	0.868293	0.141529	0.414199	0.425263	0.0982586	0.269812	1	1	Ⅰ类 高资源-高产业型
874	469	新疆维吾尔自治区	昌吉回族自治州	昌吉回族自治州	昌吉回族自治州	阜康市	天山·天池国际滑雪场	三工河谷西台子境内1-3号	待识别	待划分	城郊体验型	GaodeAPI_text(滑雪场)	88.0671	43.9663	B03E20M674	昌吉回族自治州	高山雪量稳定型	1	7.03182	-6.98982	0.659842	0.773734	0.705399	Ⅴ 很高			0	0.222301			0	0.0193768	0.00968841	1	0	Ⅱ类 高资源-低产业型
875	895	黑龙江省	哈尔滨市	哈尔滨市	哈尔滨市	尚志市	新亚布力滑雪场	金牌大道84号	待识别	待划分	城郊体验型	GaodeAPI_text(滑雪场)	128.449	44.7742	B0FFGTKWFZ	哈尔滨市	高山雪量稳定型	1	3.125	-7.01987	0.293239	0.774688	0.485819	Ⅴ 很高	60163000	1105.69	0	0.482107	0.111564	0.331501	0	0.0511016	0.123542	1	0	Ⅱ类 高资源-低产业型
876	573	河北省	张家口市	张家口市	张家口市	崇礼区	崇礼泊心湾雪墅店近富龙滑雪场	裕兴路与奥雪东路交叉口南40米	待识别	待划分	城郊体验型	GaodeAPI_text(滑雪场)	115.294	40.9819	B0J0LHOQ1J	张家口市	高山雪量稳定型	1	0.752273	-7.04029	0.0705907	0.775336	0.352489	Ⅴ 很高	19133000	213.58	405.01	1.00065	0.0354796	0.0640343	0.18923	0.11442	0.100791	1	0	Ⅱ类 高资源-低产业型
877	173	吉林省	长春市	长春市	长春市	南关区	斯奇曼滑雪俱乐部	泰兴街与华惠路交会钜城华亿购物中心6号门4楼电梯旁	待识别	待划分	城郊体验型	GaodeAPI_text(滑雪场)	125.319	43.7989	B0GRYZU0MW	长春市	高山雪量稳定型	1	0	-7.07465	0	0.776427	0.310571	Ⅴ 很高	76321900	1381.52	910.19	0.868293	0.141529	0.414199	0.425263	0.0982586	0.269812	1	1	Ⅰ类 高资源-高产业型
878	160	吉林省	辽源市	辽源市	辽源市	西安区	天陆山滑雪场	县级直管村级单位仙城大街2970号	待识别	待划分	城郊体验型	GaodeAPI_text(滑雪场)	125.161	42.9487	B0J0R5OAJ3	辽源市	高山雪量稳定型	1	4.475	-7.07747	0.419919	0.776517	0.562558	Ⅴ 很高	5276900	38.75	94.38	0.620065	0.00978532	0.0116178	0.0440966	0.0679476	0.0333618	1	0	Ⅱ类 高资源-低产业型
879	483	新疆维吾尔自治区	阿勒泰地区	阿勒泰地区	阿勒泰地区	富蕴县	富蕴县新天地滑雪场(暂停营业)	天蕴名苑北2公里处	待识别	待划分	城市综合体室内雪场型	GaodeAPI_text(冰雪世界)	89.5329	47.0175	B0FFK50UHV	阿勒泰地区	高山雪量稳定型	1	10.6568	-7.12228	1	0.777939	0.911175	Ⅴ 很高			0	0.119548			0	0.00682971	0.00341485	1	0	Ⅱ类 高资源-低产业型
880	454	新疆维吾尔自治区	哈密市	哈密市	哈密市	巴里坤哈萨克自治县	蒲类大观园滑雪场	新市路14号	待识别	待划分	城市综合体室内雪场型	GaodeAPI_text(冰雪世界)	93.0281	43.6027	B03860LVXQ	哈密市	高山雪量稳定型	1	0	-7.15013	0	0.778823	0.311529	Ⅴ 很高	10843936	39.4	0	0.116779	0.0201087	0.0118127	0	0.00649159	0.00960323	1	0	Ⅱ类 高资源-低产业型
881	904	黑龙江省	哈尔滨市	哈尔滨市	哈尔滨市	阿城区	凤山滑雪场	哈阿高速公路玉泉口出处收费站右侧林场对过距玉泉火车站2公里	待识别	待划分	城郊体验型	GaodeAPI_text(滑雪场)	127.173	45.398	B01C30K2DM	哈尔滨市	高山雪量稳定型	1	3.125	-7.18447	0.293239	0.779913	0.487909	Ⅴ 很高	60163000	1105.69	0	0.482107	0.111564	0.331501	0	0.0511016	0.123542	1	0	Ⅱ类 高资源-低产业型
882	172	吉林省	长春市	长春市	长春市	南关区	南关区滑雪场	净月大街与柳莺东路交叉口西北40米	待识别	待划分	城郊体验型	GaodeAPI_text(滑雪场)	125.45	43.7765	B0JDRNA2BH	长春市	高山雪量稳定型	1	0	-7.20232	0	0.780479	0.312192	Ⅴ 很高	76321900	1381.52	910.19	0.868293	0.141529	0.414199	0.425263	0.0982586	0.269812	1	1	Ⅰ类 高资源-高产业型
883	123	吉林省	吉林市	吉林市	吉林市	丰满区	朱雀山滑雪场(暂停营业)	江南乡吉丰东路10公里孟家村朱雀山国家森林公园(西南角)	待识别	待划分	城郊体验型	GaodeAPI_text(滑雪场)	126.686	43.7803	B01B0024JS	吉林市	高山雪量稳定型	1	0	-7.24541	0	0.781847	0.312739	Ⅴ 很高	16332300	547.2	352.81	0.534725	0.0302861	0.164058	0.164841	0.0575268	0.104178	1	0	Ⅱ类 高资源-低产业型
884	433	新疆维吾尔自治区	乌鲁木齐市	乌鲁木齐市	乌鲁木齐市	沙依巴克区	阳光100雪乐山室内滑雪场	钱塘江路333号七一阳光100休闲广场5楼	室内	待划分	城市综合体室内雪场型	GaodeAPI_text(滑雪场)	87.5952	43.7825	B0J1C18KML	乌鲁木齐市	高山雪量稳定型	1	3.17045	-7.35847	0.297505	0.785436	0.492677	Ⅴ 很高	45021600	479.18	408.48	0.766738	0.0834866	0.143665	0.190852	0.0858578	0.125965	1	0	Ⅱ类 高资源-低产业型
885	128	吉林省	吉林市	吉林市	吉林市	船营区	北山滑雪场	致和街新春胡同6-4号	待识别	待划分	城郊体验型	GaodeAPI_text(滑雪场)	126.526	43.8459	B0L6AC0C7F	吉林市	高山雪量稳定型	1	0	-7.46548	0	0.788833	0.315533	Ⅴ 很高	16332300	547.2	352.81	0.534725	0.0302861	0.164058	0.164841	0.0575268	0.104178	1	0	Ⅱ类 高资源-低产业型
886	490	新疆维吾尔自治区	阿勒泰地区	阿勒泰地区	阿勒泰地区	青河县	青格里狼山滑雪场A区(暂停营业)	阿热勒托别镇青格里狼山景区	待识别	待划分	滑雪+度假综合型	GaodeAPI_text(滑雪旅游度假区)	90.3483	46.5606	B0I30SNDFC	阿勒泰地区	高山雪量稳定型	1	10.6568	-7.46637	1	0.788861	0.915544	Ⅴ 很高			0	0.119548			0	0.00682971	0.00341485	1	0	Ⅱ类 高资源-低产业型
887	885	黑龙江省	双鸭山市	双鸭山市	双鸭山市	尖山区	云峰山滑雪场(暂停营业)	安邦乡向阳小区四路车终点	待识别	待划分	城郊体验型	GaodeAPI_text(滑雪场)	131.184	46.6525	B0FFGFEVNJ	双鸭山市	高山雪量稳定型	1	5.78864	-7.50658	0.543186	0.790138	0.641967	Ⅴ 很高	5574000	0	0	0.298788	0.0103363	0	0	0.0287166	0.00976322	1	0	Ⅱ类 高资源-低产业型
888	797	辽宁省	铁岭市	铁岭市	铁岭市	调兵山市	调兵山市瑞隆滑雪场(暂停营业)	晓楠镇高力沟村	待识别	待划分	城郊体验型	GaodeAPI_text(滑雪场)	123.508	42.4087	B0IK1COO3Z	铁岭市	高山雪量稳定型	1	1.00909	-7.5416	0.0946897	0.791249	0.373313	Ⅴ 很高	7786000	55.29	226.4	0.480424	0.0144381	0.0165767	0.10578	0.0508961	0.0469226	1	0	Ⅱ类 高资源-低产业型
889	141	吉林省	延边朝鲜族自治州	延边朝鲜族自治州	延边朝鲜族自治州	敦化市	敦化市北山滑雪场	北山公园北坡	待识别	待划分	城郊体验型	GaodeAPI_text(滑雪场)	128.227	43.3872	B05990MBLI	延边朝鲜族自治州	高山雪量稳定型	1	2.43864	-7.54245	0.228833	0.791276	0.45381	Ⅴ 很高			189.49	0.296596			0.0885343	0.028449	0.0584916	1	0	Ⅱ类 高资源-低产业型
890	76	北京市	北京市	北京市	北京市	密云区	滑雪之约	河东路与河宁路交叉口西北140米	待识别	待划分	滑雪+度假综合型	GaodeAPI_text(滑雪小镇)	116.857	40.3475	B0LUSUZF5E	北京市	高山雪量稳定型	1	0	-7.64533	0	0.794542	0.317817	Ⅴ 很高	498431000	2914		4.08856	0.924275	0.873658		0.491484	0.763139	1	1	Ⅰ类 高资源-高产业型
891	876	黑龙江省	伊春市	伊春市	伊春市	伊美区	梅花山滑雪场(暂停营业)	青山路131号(伊青林场所旁边)	待识别	待划分	城郊体验型	GaodeAPI_text(滑雪场)	129.172	47.8868	B01CA0M0YY	伊春市	高山雪量稳定型	1	0	-7.7233	0	0.797017	0.318807	Ⅴ 很高	3704700	54.36	104.83	0.149953	0.00686988	0.0162979	0.0489791	0.0105424	0.0206723	1	0	Ⅱ类 高资源-低产业型
892	926	黑龙江省	鸡西市	鸡西市	鸡西市	密山市	蜂蜜山滑雪场	[]	待识别	待划分	城郊体验型	GaodeAPI_text(滑雪场)	132.104	45.4031	B0L6KCPIOA	鸡西市	高山雪量稳定型	1	0	-7.74755	0	0.797787	0.319115	Ⅴ 很高	6226000	55.4	160.96	0.603947	0.0115453	0.0166097	0.0752044	0.0659794	0.0423347	1	0	Ⅱ类 高资源-低产业型
893	909	黑龙江省	哈尔滨市	哈尔滨市	哈尔滨市	阿城区	阿城区冰雪嘉年华	解放大街甲406号阿什河公园	待识别	待划分	城郊体验型	GaodeAPI_text(冰雪城)	126.999	45.5361	B0FFIQUMAE	哈尔滨市	高山雪量稳定型	1	3.125	-7.75845	0.293239	0.798132	0.495197	Ⅴ 很高	60163000	1105.69	0	0.482107	0.111564	0.331501	0	0.0511016	0.123542	1	0	Ⅱ类 高资源-低产业型
894	144	吉林省	延边朝鲜族自治州	延边朝鲜族自治州	延边朝鲜族自治州	龙井市	海兰江滑雪场(暂停营业)	龙门街道延边大学农学院西北	待识别	待划分	城郊体验型	GaodeAPI_text(滑雪场)	129.392	42.7898	B05990MB2V	延边朝鲜族自治州	高山雪量稳定型	1	2.43864	-7.76998	0.228833	0.798499	0.456699	Ⅴ 很高			189.49	0.296596			0.0885343	0.028449	0.0584916	1	0	Ⅱ类 高资源-低产业型
895	459	新疆维吾尔自治区	塔城地区	塔城地区	塔城地区	沙湾市	翠山国际滑雪场	三道河子镇005乡道	待识别	待划分	城市综合体室内雪场型	GaodeAPI_text(冰雪世界)	85.5507	44.2823	B0FFGJAIVT	塔城地区	高山雪量稳定型	1	8.49545	-7.83989	0.797185	0.800718	0.798598	Ⅴ 很高			109.65	0.165306			0.0512311	0.0124172	0.0318242	1	0	Ⅱ类 高资源-低产业型
896	132	吉林省	四平市	四平市	四平市	铁东区	叶赫皇家山滑雪场	叶赫满族镇砬子沟村	待识别	待划分	城郊体验型	GaodeAPI_text(滑雪场)	124.595	43.0077	B01B20N1R7	四平市	高山雪量稳定型	1	0	-7.84814	0	0.800979	0.320392	Ⅴ 很高	5805800	0	206.98	0.553224	0.0107661	0	0.0967061	0.0597857	0.0418145	1	0	Ⅱ类 高资源-低产业型
897	125	吉林省	吉林市	吉林市	吉林市	永吉县	北大湖滑雪度假区票务中心	北大壶开发区雪上项目综合训练中心A栋2302室	待识别	待划分	滑雪+度假综合型	GaodeAPI_text(滑雪场)	126.617	43.4248	B0IKHCI3T0	吉林市	高山雪量稳定型	1	0	-7.91749	0	0.803181	0.321272	Ⅴ 很高	16332300	547.2	352.81	0.534725	0.0302861	0.164058	0.164841	0.0575268	0.104178	1	0	Ⅱ类 高资源-低产业型
898	463	新疆维吾尔自治区	塔城地区	塔城地区	塔城地区	额敏县	也迷里滑雪场(暂停营业)	霍吉尔特蒙古民族乡野果林景区	待识别	待划分	城市综合体室内雪场型	GaodeAPI_text(冰雪世界)	83.9503	46.3728	B03850ME6O	塔城地区	高山雪量稳定型	1	8.49545	-7.92209	0.797185	0.803327	0.799642	Ⅴ 很高			109.65	0.165306			0.0512311	0.0124172	0.0318242	1	0	Ⅱ类 高资源-低产业型
899	437	新疆维吾尔自治区	伊犁哈萨克自治州	伊犁哈萨克自治州	伊犁哈萨克自治州	伊宁市	大美西域滑雪场(暂停营业)	巴彦岱镇新汶路九城生态园	待识别	待划分	城市综合体室内雪场型	GaodeAPI_text(冰雪世界)	81.2012	44.0204	B0FFFRUG4J	伊犁哈萨克自治州	高山雪量稳定型	1	5.50455	-8.00444	0.516528	0.805941	0.632293	Ⅴ 很高			0	0.308364			0	0.0298859	0.014943	1	0	Ⅱ类 高资源-低产业型
900	466	新疆维吾尔自治区	昌吉回族自治州	昌吉回族自治州	昌吉回族自治州	奇台县	南湖滑雪场	距奇台县城中心5公里的南湖牧业村	待识别	待划分	城郊体验型	GaodeAPI_text(滑雪中心)	89.5275	44.0044	B0FFINMKZ2	昌吉回族自治州	高山雪量稳定型	1	7.03182	-8.01958	0.659842	0.806421	0.718474	Ⅴ 很高			0	0.222301			0	0.0193768	0.00968841	1	0	Ⅱ类 高资源-低产业型
901	889	黑龙江省	哈尔滨市	哈尔滨市	哈尔滨市	宾县	黑龙江省长寿山滑雪场(暂停营业)	宾西国家森林公园内	待识别	待划分	城郊体验型	GaodeAPI_text(滑雪场)	127.255	45.6227	B01C30LDXR	哈尔滨市	高山雪量稳定型	1	3.125	-8.1097	0.293239	0.809282	0.499656	Ⅴ 很高	60163000	1105.69	0	0.482107	0.111564	0.331501	0	0.0511016	0.123542	1	0	Ⅱ类 高资源-低产业型
902	882	黑龙江省	佳木斯市	佳木斯市	佳木斯市	郊区	卧佛山滑雪场	敖其镇民兴村南2公里	待识别	待划分	城郊体验型	GaodeAPI_text(滑雪场)	130.154	46.7548	B01C60MPXD	佳木斯市	高山雪量稳定型	1	6.17727	-8.11048	0.579655	0.809307	0.671515	Ⅴ 很高	10077000	59.7	223.5	0.381751	0.0186865	0.0178989	0.104425	0.0388472	0.0449643	1	0	Ⅱ类 高资源-低产业型
903	890	黑龙江省	哈尔滨市	哈尔滨市	哈尔滨市	宾县	龙珠二龙山滑雪场(暂停营业)	二龙山风景区	待识别	待划分	城郊体验型	GaodeAPI_text(滑雪场)	127.41	45.7251	B01C30J7F9	哈尔滨市	高山雪量稳定型	1	3.125	-8.11698	0.293239	0.809513	0.499749	Ⅴ 很高	60163000	1105.69	0	0.482107	0.111564	0.331501	0	0.0511016	0.123542	1	0	Ⅱ类 高资源-低产业型
904	478	新疆维吾尔自治区	阿克苏地区	阿克苏地区	阿克苏地区	温宿县	天山托峰滑雪场	塔格拉克牧场塔格拉克村三组	待识别	待划分	城市综合体室内雪场型	GaodeAPI_text(冰雪世界)	80.3536	41.7123	B0H6DD8EYN	阿克苏地区	高山雪量稳定型	1	0.654545	-8.2107	0.0614203	0.812488	0.361847	Ⅴ 很高			0	0.117211			0	0.00654434	0.00327217	1	0	Ⅱ类 高资源-低产业型
905	925	黑龙江省	绥化市	绥化市	绥化市	海伦市	海伦市锦绣山滑雪场	锦绣山湖畔庄园东侧	待识别	待划分	城郊体验型	GaodeAPI_text(滑雪场)	127.149	47.4244	B0KKHRUSH8	绥化市	高山雪量稳定型	1	0	-8.26023	0	0.81406	0.325624	Ⅴ 很高	12440000	0	356	0.292913	0.0230683	0	0.166332	0.0279992	0.0543498	1	0	Ⅱ类 高资源-低产业型
906	930	黑龙江省	齐齐哈尔市	齐齐哈尔市	齐齐哈尔市	梅里斯达斡尔族区	明月岛滑雪场	沿江北街4号明月岛(西北角)	待识别	待划分	城郊体验型	GaodeAPI_text(滑雪场)	123.903	47.4119	B01C402JTP	齐齐哈尔市	高山雪量稳定型	1	3.09545	-8.35655	0.290467	0.817117	0.501127	Ⅴ 很高	13531000	102.5	509	0.306944	0.0250915	0.0307309	0.237817	0.0297125	0.080838	1	0	Ⅱ类 高资源-低产业型
907	907	黑龙江省	哈尔滨市	哈尔滨市	哈尔滨市	阿城区	神鹿雪场(暂停营业)	平山镇平山旅游区	待识别	待划分	城郊体验型	GaodeAPI_text(滑雪场)	127.368	45.3048	B01C30II71	哈尔滨市	高山雪量稳定型	1	3.125	-8.40213	0.293239	0.818564	0.503369	Ⅴ 很高	60163000	1105.69	0	0.482107	0.111564	0.331501	0	0.0511016	0.123542	1	0	Ⅱ类 高资源-低产业型
908	582	河北省	承德市	承德市	承德市	围场满族蒙古族自治县	滑雪场	凤凰南路	待识别	待划分	城郊体验型	GaodeAPI_text(滑雪场)	117.523	42.2766	B013A01QR4	承德市	高山雪量稳定型	1	0	-8.52566	0	0.822486	0.328994	Ⅴ 很高	19626000	300.48	330.22	0.366635	0.0363938	0.0900881	0.154287	0.0370014	0.0794425	1	0	Ⅱ类 高资源-低产业型
909	461	新疆维吾尔自治区	塔城地区	塔城地区	塔城地区	裕民县	巴尔鲁克雪域之都滑雪场(暂停营业)	冰雪体验中心东南198米	待识别	待划分	城郊体验型	GaodeAPI_text(滑雪场)	82.9489	46.1411	B0FFIR9CP8	塔城地区	高山雪量稳定型	1	8.49545	-8.56469	0.797185	0.823725	0.807801	Ⅴ 很高			109.65	0.165306			0.0512311	0.0124172	0.0318242	1	0	Ⅱ类 高资源-低产业型
910	918	黑龙江省	大庆市	大庆市	大庆市	让胡路区	红骥滑雪场(暂停营业)	让杜路乡情园	待识别	待划分	城郊体验型	GaodeAPI_text(滑雪场)	124.722	46.737	B0FFF6AFEF	大庆市	高山雪量稳定型	1	0	-8.64412	0	0.826246	0.330498	Ⅴ 很高	28158000	65.1	0	0.411385	0.0522153	0.0195179	0	0.0424658	0.0285497	1	0	Ⅱ类 高资源-低产业型
911	884	黑龙江省	双鸭山市	双鸭山市	双鸭山市	宝清县	圣洁摇篮山滑雪旅游度假地(暂停营业)	梨树林场	待识别	待划分	滑雪+度假综合型	GaodeAPI_text(滑雪旅游度假区)	132.012	46.3113	B0FFHXK55K	双鸭山市	高山雪量稳定型	1	5.78864	-8.68915	0.543186	0.827675	0.656982	Ⅴ 很高	5574000	0	0	0.298788	0.0103363	0	0	0.0287166	0.00976322	1	0	Ⅱ类 高资源-低产业型
912	38	内蒙古自治区	呼伦贝尔市	呼伦贝尔市	呼伦贝尔市	扎兰屯市	金龙山滑雪场	卧牛河镇五星村6组	待识别	待划分	滑雪+度假综合型	GaodeAPI_text(滑雪度假区)	122.632	48.0526	B01D60NRLQ	呼伦贝尔市	高山雪量稳定型	1	4.47273	-8.76854	0.419706	0.830195	0.583901	Ⅴ 很高	17306700	192.79	216.63	0.125108	0.032093	0.0578012	0.101215	0.00750864	0.0496544	1	0	Ⅱ类 高资源-低产业型
913	482	新疆维吾尔自治区	阿勒泰地区	阿勒泰地区	阿勒泰地区	富蕴县	可可托海国际滑雪场	226省道可可托海吐尔洪乡喀拉吉拉村5组	待识别	待划分	滑雪+度假综合型	GaodeAPI_text(滑雪度假区)	90.0591	47.1905	B0LGUR53A3	阿勒泰地区	高山雪量稳定型	1	10.6568	-8.92568	1	0.835183	0.934073	Ⅴ 很高			0	0.119548			0	0.00682971	0.00341485	1	0	Ⅱ类 高资源-低产业型
914	878	黑龙江省	伊春市	伊春市	伊春市	金林区	九峰山养心谷景区滑雪场(暂停营业)	奋斗街道鹤伊公路九峰山养心谷景区内	待识别	待划分	滑雪+度假综合型	GaodeAPI_text(滑雪场)	129.508	47.3801	B0FFIT9NQ9	伊春市	高山雪量稳定型	1	0	-8.94835	0	0.835903	0.334361	Ⅴ 很高	3704700	54.36	104.83	0.149953	0.00686988	0.0162979	0.0489791	0.0105424	0.0206723	1	0	Ⅱ类 高资源-低产业型
915	484	新疆维吾尔自治区	阿勒泰地区	阿勒泰地区	阿勒泰地区	布尔津县	吉克普林国际滑雪度假区	洪巴斯路与也禾段交叉口东北280米	待识别	待划分	滑雪+度假综合型	GaodeAPI_text(滑雪度假区)	87.4637	48.5766	B0K0UXTS31	阿勒泰地区	高山雪量稳定型	1	10.6568	-9.02491	1	0.838333	0.935333	Ⅴ 很高			0	0.119548			0	0.00682971	0.00341485	1	0	Ⅱ类 高资源-低产业型
916	462	新疆维吾尔自治区	塔城地区	塔城地区	塔城地区	裕民县	巴山滑雪场	Z807附近	待识别	待划分	城市综合体室内雪场型	GaodeAPI_text(冰雪世界)	82.8348	46.1427	B0FFFE8WVT	塔城地区	高山雪量稳定型	1	8.49545	-9.09131	0.797185	0.840441	0.814487	Ⅴ 很高			109.65	0.165306			0.0512311	0.0124172	0.0318242	1	0	Ⅱ类 高资源-低产业型
917	436	新疆维吾尔自治区	伊犁哈萨克自治州	伊犁哈萨克自治州	伊犁哈萨克自治州	伊宁县	伊宁县开心滑雪场(暂停营业)	吐鲁番于孜乡下吐鲁番于孜村北山坡	待识别	待划分	城市综合体室内雪场型	GaodeAPI_text(冰雪世界)	81.4757	44.0195	B0FFK2VD1B	伊犁哈萨克自治州	高山雪量稳定型	1	5.50455	-9.15466	0.516528	0.842452	0.646897	Ⅴ 很高			0	0.308364			0	0.0298859	0.014943	1	0	Ⅱ类 高资源-低产业型
918	445	新疆维吾尔自治区	克拉玛依市	克拉玛依市	克拉玛依市	独山子区	天山滑雪场(暂停营业)	西宁路街道217国道	待识别	待划分	城市综合体室内雪场型	GaodeAPI_text(冰雪世界)	84.8407	44.1896	B03DE003T0	克拉玛依市	高山雪量稳定型	1	1.24318	-9.19365	0.116656	0.843689	0.407469	Ⅴ 很高	13270000	36.61	48.9	0.592293	0.0246075	0.0109762	0.0228473	0.0645564	0.0307468	1	0	Ⅱ类 高资源-低产业型
919	149	吉林省	白城市	白城市	白城市	洮南市	四海明珠滑雪场	安定镇四海村四海林场南100米	待识别	待划分	城郊体验型	GaodeAPI_text(滑雪场)	122.537	45.086	B0FFFSI6JR	白城市	高山雪量稳定型	1	0	-9.21655	0	0.844416	0.337766	Ⅴ 很高	6142400	26.73	146.75	0.332848	0.0113903	0.00801403	0.0685652	0.0328757	0.0302113	1	0	Ⅱ类 高资源-低产业型
920	487	新疆维吾尔自治区	阿勒泰地区	阿勒泰地区	阿勒泰地区	阿勒泰市	小东沟滑雪场	拉斯特乡大小东沟森林风景区内	待识别	待划分	城市综合体室内雪场型	GaodeAPI_text(冰雪世界)	88.1166	47.8986	B0FFFM0Q3F	阿勒泰地区	高山雪量稳定型	1	10.6568	-9.30658	1	0.847274	0.93891	Ⅴ 很高			0	0.119548			0	0.00682971	0.00341485	1	0	Ⅱ类 高资源-低产业型
921	438	新疆维吾尔自治区	伊犁哈萨克自治州	伊犁哈萨克自治州	伊犁哈萨克自治州	伊宁市	快乐星滑雪场(暂停营业)	巴彦岱干沟北山坡	待识别	待划分	城市综合体室内雪场型	GaodeAPI_text(冰雪世界)	81.1781	44.0284	B0IKSH1I5F	伊犁哈萨克自治州	高山雪量稳定型	1	5.50455	-9.72344	0.516528	0.860506	0.654119	Ⅴ 很高			0	0.308364			0	0.0298859	0.014943	1	0	Ⅱ类 高资源-低产业型
922	148	吉林省	白城市	白城市	白城市	洮北区	查干浩特冰雪乐园(暂停营业)	欧陆风情园东490米	室内	待划分	城市综合体室内雪场型	GaodeAPI_text(冰雪世界)	122.49	45.8655	B0FFK4Y9ET	白城市	高山雪量稳定型	1	0	-9.73558	0	0.860891	0.344356	Ⅴ 很高	6142400	26.73	146.75	0.332848	0.0113903	0.00801403	0.0685652	0.0328757	0.0302113	1	0	Ⅱ类 高资源-低产业型
923	881	黑龙江省	伊春市	伊春市	伊春市	铁力市	日月峡滑雪场(西区)(暂停营业)	铁力林业局马永顺林场	待识别	待划分	城郊体验型	GaodeAPI_text(滑雪场)	128.371	47.1846	B01CA0LXRK	伊春市	高山雪量稳定型	1	0	-9.88428	0	0.865611	0.346245	Ⅴ 很高	3704700	54.36	104.83	0.149953	0.00686988	0.0162979	0.0489791	0.0105424	0.0206723	1	0	Ⅱ类 高资源-低产业型
924	879	黑龙江省	伊春市	伊春市	伊春市	铁力市	日月峡滑雪场(东区)	哈伊公路	待识别	待划分	城郊体验型	GaodeAPI_text(滑雪场)	128.389	47.1835	B01CA0LWGD	伊春市	高海拔干冷型	2	0	-10.0181	0	0.869859	0.347944	Ⅴ 很高	3704700	54.36	104.83	0.149953	0.00686988	0.0162979	0.0489791	0.0105424	0.0206723	1	0	Ⅱ类 高资源-低产业型
925	931	黑龙江省	齐齐哈尔市	齐齐哈尔市	齐齐哈尔市	碾子山区	奥悦碾子山滑雪场	佛尔寺南	待识别	待划分	滑雪+度假综合型	GaodeAPI_text(滑雪场)	122.846	47.5421	B0HK0CFHXY	齐齐哈尔市	高海拔干冷型	2	3.09545	-10.1373	0.290467	0.873643	0.523737	Ⅴ 很高	13531000	102.5	509	0.306944	0.0250915	0.0307309	0.237817	0.0297125	0.080838	1	0	Ⅱ类 高资源-低产业型
926	449	新疆维吾尔自治区	博尔塔拉蒙古自治州	博尔塔拉蒙古自治州	博尔塔拉蒙古自治州	博乐市	鑫长城滑雪场(暂停营业)	赛马场东800米	待识别	待划分	城市综合体室内雪场型	GaodeAPI_text(冰雪世界)	82.0752	44.813	B0FFM0X3NH	博尔塔拉蒙古自治州	高海拔干冷型	2	8.025	-10.4703	0.753039	0.884213	0.805508	Ⅴ 很高			0	0.201027			0	0.0167791	0.00838954	1	0	Ⅱ类 高资源-低产业型
927	914	黑龙江省	大庆市	大庆市	大庆市	萨尔图区	兰德湖主题滑雪场(暂停营业)	萨政路12号	待识别	待划分	城郊体验型	GaodeAPI_text(滑雪场)	125.126	46.6289	B0KKNP3VIH	大庆市	高海拔干冷型	2	0	-10.6531	0	0.890016	0.356006	Ⅴ 很高	28158000	65.1	0	0.411385	0.0522153	0.0195179	0	0.0424658	0.0285497	1	0	Ⅱ类 高资源-低产业型
928	912	黑龙江省	大兴安岭地区	大兴安岭地区	大兴安岭地区	加格达奇区	映山红滑雪场(暂停营业)	[]	待识别	待划分	城郊体验型	GaodeAPI_text(滑雪场)	124.069	50.3829	B01C90LUEO	大兴安岭地区	高海拔干冷型	2	9.45455	-10.8547	0.887183	0.896416	0.890876	Ⅴ 很高			37.84	0.12394			0.0176798	0.00736601	0.0125229	1	0	Ⅱ类 高资源-低产业型
929	488	新疆维吾尔自治区	阿勒泰地区	阿勒泰地区	阿勒泰地区	阿勒泰市	新疆阿勒泰西域滑雪场	拉斯特乡	待识别	待划分	城市综合体室内雪场型	GaodeAPI_text(冰雪世界)	88.1329	47.9032	B038A0LPLJ	阿勒泰地区	高海拔干冷型	2	10.6568	-10.9659	1	0.899945	0.959978	Ⅴ 很高			0	0.119548			0	0.00682971	0.00341485	1	0	Ⅱ类 高资源-低产业型
930	880	黑龙江省	伊春市	伊春市	伊春市	铁力市	日月峡滑雪场(暂停营业)	哈伊公路	待识别	待划分	城郊体验型	GaodeAPI_text(滑雪场)	128.389	47.1836	B0H6B7G0SC	伊春市	高海拔干冷型	2	0	-11.1802	0	0.906747	0.362699	Ⅴ 很高	3704700	54.36	104.83	0.149953	0.00686988	0.0162979	0.0489791	0.0105424	0.0206723	1	0	Ⅱ类 高资源-低产业型
931	489	新疆维吾尔自治区	阿勒泰地区	阿勒泰地区	阿勒泰地区	阿勒泰市	阿尔泰山野卡峡滑雪场	阿苇滩镇	待识别	待划分	城市综合体室内雪场型	GaodeAPI_text(冰雪世界)	88.3063	48.1765	B0FFM47OL8	阿勒泰地区	高海拔干冷型	2	10.6568	-12.5082	1	0.948901	0.97956	Ⅴ 很高			0	0.119548			0	0.00682971	0.00341485	1	0	Ⅱ类 高资源-低产业型
932	929	黑龙江省	黑河市	黑河市	黑河市	爱辉区	黑河红河谷国际滑雪场	二道白河旅游经济开发区卧牛湖风景区内(S209省道转卧牛湖水库方向)	待识别	待划分	城郊体验型	GaodeAPI_text(滑雪场)	127.336	50.2941	B0FFFRTBH3	黑河市	高海拔干冷型	2	0	-13.2118	0	0.971235	0.388494	Ⅴ 很高	7114000	38.4	123	0.174877	0.013192	0.0115129	0.0574686	0.0135859	0.0239398	1	0	Ⅱ类 高资源-低产业型
933	913	黑龙江省	大兴安岭地区	大兴安岭地区	大兴安岭地区	漠河市	中国最北滑雪场	北极村旅游风景区	待识别	待划分	城郊体验型	GaodeAPI_text(滑雪场)	122.598	53.4598	B0FFGM3I8E	大兴安岭地区	高海拔干冷型	2	9.45455	-13.8517	0.887183	0.991548	0.928929	Ⅴ 很高			37.84	0.12394			0.0176798	0.00736601	0.0125229	1	0	Ⅱ类 高资源-低产业型
934	39	内蒙古自治区	呼伦贝尔市	呼伦贝尔市	呼伦贝尔市	牙克石市	凤凰山滑雪场(暂停营业)	凤游线	待识别	待划分	城郊体验型	GaodeAPI_text(滑雪中心)	120.859	49.203	B0JRAKHX32	呼伦贝尔市	高海拔干冷型	2	4.47273	-14.118	0.419706	1	0.651823	Ⅴ 很高	17306700	192.79	216.63	0.125108	0.032093	0.0578012	0.101215	0.00750864	0.0496544	1	0	Ⅱ类 高资源-低产业型
