# Supplementary material
Source: Research Square preprint supplement (doi:10.21203/rs.3.rs-9182910/v1)
Supplement: Supplementary file 5 [file f0ea545cc8503a0617a41699.xlsx]

## Sheet: 表格_20260308 (4)
滑雪场名称	营业状态
哈尔滨热雪奇迹	正常
哈尔滨名都滑雪场	正常
亚布力雪都滑雪度假中心	正常
哈体院帽儿山滑雪场	正常
哈尔滨玉泉霜雪滑雪场	正常
牡丹峰滑雪场	正常
平山神鹿滑雪场	正常
玉泉威虎山滑雪场	正常
上京国际滑雪场	正常
东村·滑雪公园	正常
天恒山冰雪运动大世界	正常
万峰通化滑雪度假区	正常
长春天定山滑雪场	正常
莲花山滑雪场	正常
长春庙香山滑雪场	正常
长春净月潭滑雪场	正常
梦都美民俗旅游度假村滑雪场	正常
长白山和平滑雪场	正常
海兰江滑雪场	正常
万达长白山国际滑雪场	正常
北大湖滑雪度假区	正常
长白山国际滑雪场	正常
长白山华美胜地山地滑雪场	正常
东北亚滑雪场	正常
棋盘山冰雪大世界	正常
白清寨滑雪场	正常
和平湾冰雪大世界	正常
沈阳怪坡滑雪场	正常
辽阳弓长岭温泉滑雪场	正常
五龙高尔夫滑雪场	正常
天桥沟滑雪场	正常
千山滑雪场	正常
何家沟滑雪场	正常
大连林海滑雪场	正常
大连铭湖温泉滑雪度假园区	正常
南山滑雪场	正常
北京渔阳国际滑雪场	正常
大跳台	正常
军都山滑雪场	正常
蓝调庄园-滑雪场	正常
云居滑雪场	正常
北京西山滑雪场	正常
雪都滑雪场	正常
北京怀北国际滑雪场	正常
万科石京龙滑雪场	正常
八达岭滑雪场	正常
北京云佛山滑雪场	正常
华彬生态园滑雪场	正常
伏龙滑雪场	正常
太舞滑雪场	正常
翠云山银河滑雪场	正常
阿那亚拾雪川滑雪场	正常
多乐美地滑雪度假区	正常
密云苑云顶滑雪场	正常
万龙滑雪场	正常
赤峰道谷南山滑雪场	正常
美林谷滑雪场	正常
呼伦贝尔市·凤凰山滑雪中心	正常
金龙山滑雪场	正常
留坝县紫柏山国际滑雪场	正常
白鹿原滑雪场	正常
翠华山滑雪场	正常
西安竹林畔滑雪场	正常
照金国际滑雪场	正常
冯家塬必捷滑雪场	正常
太白鳌山滑雪场	正常
丰原必捷滑雪场	正常
华山国际滑雪场	正常
袁家村北必捷滑雪场	正常
维斯特滑雪场	正常
丝绸之路国际滑雪场	正常
白云滑雪场	正常
可可托海国际滑雪度假区	正常
青格里狼山国际滑雪场	正常
天山·天池国际滑雪场	正常
将军山滑雪场	正常
吉克普林国际滑雪度假区	正常
龙山国际滑雪场	正常
兴隆山滑雪场	正常
极地冰雪小镇(郑州人民公园店)	正常
嵩顶滑雪度假区	正常
郑州豫龙滑雪场	正常
九龙口滑雪乐园	正常
伊龙国际滑雪场	正常
倒盏村奥斯陆滑雪场	正常
当阳峪滑雪乐园	正常
黄冈桃花冲滑雪场	正常
英山大别山南武当滑雪场	正常
五峰国际滑雪场	正常
神农架国际滑雪场	正常
神农架中和滑雪场	正常
